# Supplementary material for: Metabolome Genome-Wide Association Study Identifies 74 Novel Genomic Regions Influencing Plasma Metabolites Levels
Source: MDPI journal article supplement (doi:10.3390/metabo12010061), 2022-01-11

**Figure S2.** The distribution of the normalized effect size (NES) across a selection of GTEx-available tissues. Only the most significant eQTL effect per associated region (Supplementary Table 3) was selected. The top two rows are selected on the basis of a high NES median and the bottom two of a low NES median.

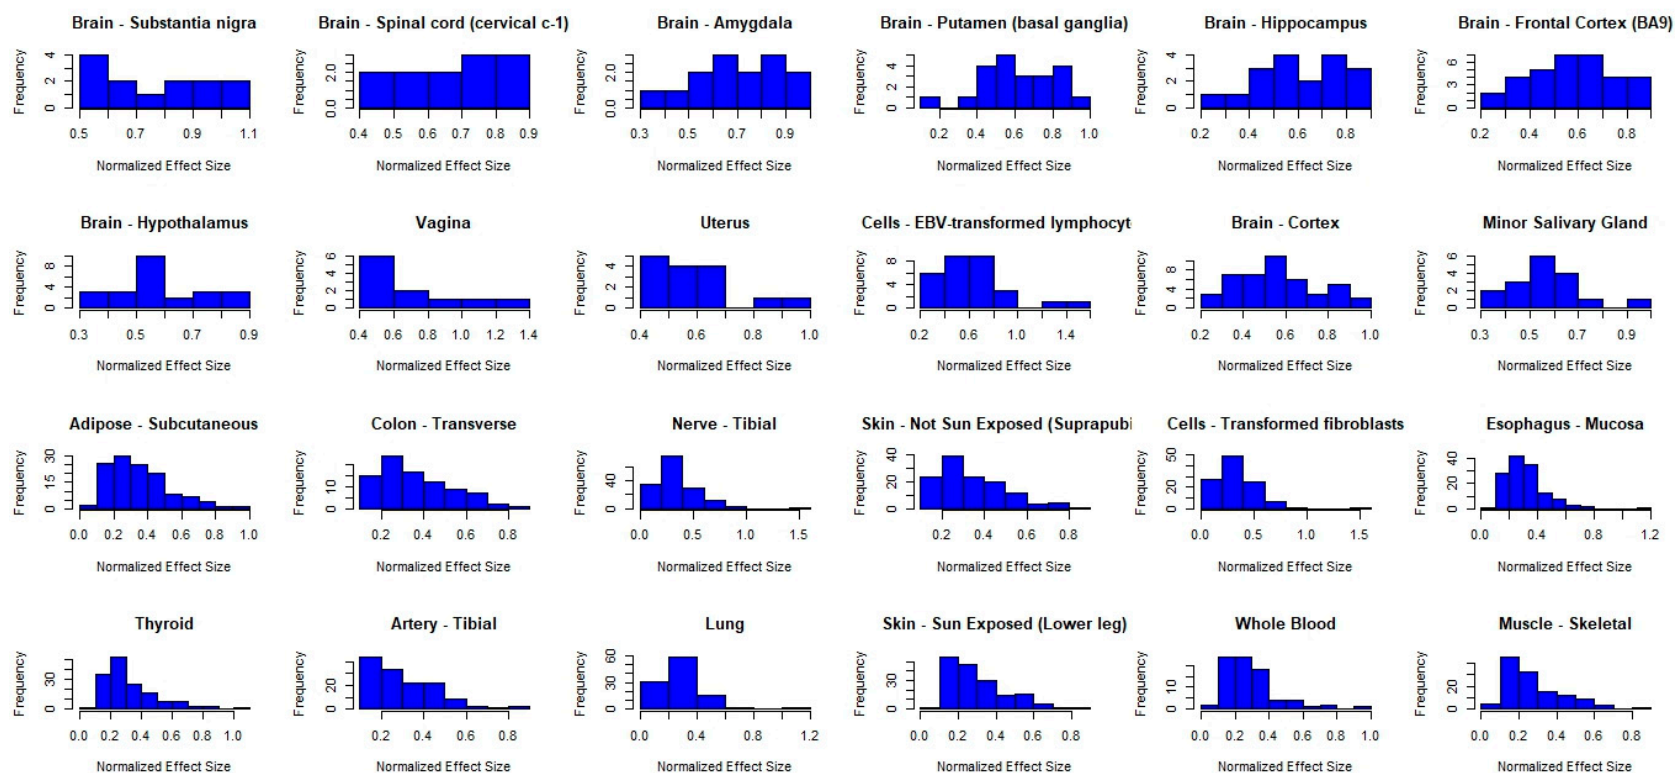

Supplement: s1 [file s1]
