# Supplementary material for: Metabolome Genome-Wide Association Study Identifies 74 Novel Genomic Regions Influencing Plasma Metabolites Levels
Source: Metabolites. 2022 Jan 11;12(1):61. doi: 10.3390/metabo12010061 (PMC8777659; doi:10.3390/metabo12010061)
Supplement: Supplementary file 1 [file metabolites-12-00061-s001.zip]

Archive with 5 entries (5 files):
- Figure S1.pdf
- Figure S2.pdf
- Figure S3.pdf
- Supplementary file NIHR Bioresource Consortium.xls
- Supplementary Tables_submit.xlsx
