# Supplementary material for: Metabolome Genome-Wide Association Study Identifies 74 Novel Genomic Regions Influencing Plasma Metabolites Levels
Source: Metabolites. 2022 Jan 11;12(1):61. doi: 10.3390/metabo12010061 (PMC8777659; doi:10.3390/metabo12010061)
Supplement: Supplementary file 1 [file metabolites-12-00061-s001.zip › Supplementary file NIHR Bioresource Consortium.xls]

## Sheet: Teams
Forename	Surname	Affliation1	Affliation2	Affliation3	Affliation4	Affliation5
Principal Investigators NIHR BioResource - Rare Diseases Consortium Projects
Timothy J	Aitman	MRC Clinical Sciences Centre, Faculty of Medicine, Imperial College London,London,UK	Institute of Genetics and Molecular Medicine, University of Edinburgh,Edinburgh,UK
David L	Bennett	The Nuffield Department of Clinical Neurosciences, University of Oxford, John Radcliffe Hospital,Oxford,UK
Mark	Caulfield	Genomics England, Charterhouse Square,London,UK	William Harvey Research Institute, NIHR Biomedical Research Centre at Barts, Queen Mary University of London,London,UK
Patrick F	Chinnery	Department of Clinical Neurosciences, School of Clinical Medicine, University of Cambridge, Cambridge Biomedical Campus,Cambridge,UK	Medical Research Council Mitochondrial Biology Unit, Cambridge Biomedical Campus,Cambridge,UK	NIHR BioResource, Cambridge University Hospitals NHS Foundation, Cambridge Biomedical Campus,Cambridge,UK
Peter H	Dixon	Division of Women's Health, King's College London,London,UK
Kathleen	Freson	Department of Cardiovascular Sciences, Center for Molecular and Vascular Biology, KULeuven,Leuven,Belgium
Daniel P	Gale	UCL Centre for Nephrology, University College London,London,UK
Ania	Koziell	King's College London,London,UK	Department of Paediatric Nephrology, Evelina London Children's Hospital, Guy's & St Thomas' NHS Foundation Trust,London,UK
Taco W	Kuijpers	Department of Pediatric Hematology, Immunology, Rheumatology and Infectious Diseases, Emma Children’s Hospital, Academic Medical Center (AMC), University of Amsterdam,Amsterdam,The Netherlands	Department of Blood Cell Research, Sanquin,Amsterdam,The Netherlands
Michael A	Laffan	Department of Haematology, Hammersmith Hospital, Imperial College Healthcare NHS Trust,London,UK	Centre for Haematology, Imperial College London,London,UK
Eamonn R	Maher	Department of Medical Genetics, Cambridge Institute for Medical Research, University of Cambridge, Cambridge Biomedical Campus,Cambridge,UK	NIHR Cambridge Biomedical Research Centre, Cambridge Biomedical Campus,Cambridge,UK
Hugh S	Markus	Stroke Research Group, Department of Clinical Neurosciences, University of Cambridge, Cambridge Biomedical Campus,Cambridge,UK
Nicholas	Morrell	Department of Medicine, School of Clinical Medicine, University of Cambridge, Cambridge Biomedical Campus,Cambridge,UK	NIHR BioResource, Cambridge University Hospitals NHS Foundation, Cambridge Biomedical Campus,Cambridge,UK
Willem H	Ouwehand	Department of Haematology, University of Cambridge, Cambridge Biomedical Campus,Cambridge,UK	NIHR BioResource, Cambridge University Hospitals NHS Foundation, Cambridge Biomedical Campus,Cambridge,UK	Wellcome Sanger Institute, Wellcome Genome Campus, Hinxton,Cambridge,UK	NHS Blood and Transplant, Cambridge Biomedical Campus,Cambridge,UK	British Heart Foundation Cambridge Centre of Excellence, University of Cambridge,Cambridge,UK
F Lucy	Raymond	Department of Medical Genetics, Cambridge Institute for Medical Research, University of Cambridge, Cambridge Biomedical Campus,Cambridge,UK	NIHR BioResource, Cambridge University Hospitals NHS Foundation, Cambridge Biomedical Campus,Cambridge,UK
Irene	Roberts	MRC Molecular Haematology Unit, MRC Weatherall Institute of Molecular Medicine, University of Oxford,Oxford,UK	Department of Paediatrics, Weatherall Institute of Molecular Medicine, University of Oxford,Oxford,UK	NIHR Oxford Biomedical Research Centre, Oxford University Hospitals Trust,Oxford,UK
Kenneth G C	Smith	Department of Medicine, School of Clinical Medicine, University of Cambridge, Cambridge Biomedical Campus,Cambridge,UK
Adrian J	Thrasher	UCL Great Ormond Street Institute of Child Health,London,UK
Hugh	Watkins	Department of Cardiovascular Medicine, Radcliffe Department of Medicine, University of Oxford,Oxford,UK	Wellcome Centre for Human Genetics, University of Oxford,Oxford,UK	Oxford University Hospitals NHS Foundation Trust,Oxford,UK
Catherine	Williamson	Division of Women's Health, King's College London,London,UK	Institute of Reproductive and Developmental Biology, Surgery and Cancer, Hammersmith Hospital, Imperial College Healthcare NHS Trust,London,UK
Christopher Geoffrey	Woods	Department of Medical Genetics, Cambridge Institute for Medical Research, University of Cambridge, Cambridge Biomedical Campus,Cambridge,UK	Addenbrookes Hospital, Cambridge University Hospitals NHS Foundation Trust,Cambridge,UK
NIIHR BioResource - Rare Diseases - Management Team
Sofie	Ashford	Department of Public Health and Primary Care, University of Cambridge,Cambridge,UK	NIHR BioResource, Cambridge University Hospitals NHS Foundation, Cambridge Biomedical Campus,Cambridge,UK
John R	Bradley	Addenbrookes Hospital, Cambridge University Hospitals NHS Foundation Trust,Cambridge,UK	Department of Medicine, School of Clinical Medicine, University of Cambridge, Cambridge Biomedical Campus,Cambridge,UK	Department of Renal Medicine, Addenbrookes Hospital, Cambridge University Hospitals NHS Foundation Trust,Cambridge,UK	NIHR BioResource, Cambridge University Hospitals NHS Foundation, Cambridge Biomedical Campus,Cambridge,UK	NIHR Cambridge Biomedical Research Centre, Cambridge Biomedical Campus,Cambridge,UK
Debra	Fletcher	Department of Haematology, University of Cambridge, Cambridge Biomedical Campus,Cambridge,UK	NIHR BioResource, Cambridge University Hospitals NHS Foundation, Cambridge Biomedical Campus,Cambridge,UK
Roger	James	Department of Haematology, University of Cambridge, Cambridge Biomedical Campus,Cambridge,UK	NIHR BioResource, Cambridge University Hospitals NHS Foundation, Cambridge Biomedical Campus,Cambridge,UK
Mary A	Kasanicki	Addenbrookes Hospital, Cambridge University Hospitals NHS Foundation Trust,Cambridge,UK
Nathalie	Kingston	NIHR BioResource, Cambridge University Hospitals NHS Foundation, Cambridge Biomedical Campus,Cambridge,UK
Willem H	Ouwehand	Department of Haematology, University of Cambridge, Cambridge Biomedical Campus,Cambridge,UK	NIHR BioResource, Cambridge University Hospitals NHS Foundation, Cambridge Biomedical Campus,Cambridge,UK	Wellcome Sanger Institute, Wellcome Genome Campus, Hinxton,Cambridge,UK	NHS Blood and Transplant, Cambridge Biomedical Campus,Cambridge,UK	British Heart Foundation Cambridge Centre of Excellence, University of Cambridge,Cambridge,UK
Christopher J	Penkett	Department of Haematology, University of Cambridge, Cambridge Biomedical Campus,Cambridge,UK	NIHR BioResource, Cambridge University Hospitals NHS Foundation, Cambridge Biomedical Campus,Cambridge,UK
F Lucy	Raymond	Department of Medical Genetics, Cambridge Institute for Medical Research, University of Cambridge, Cambridge Biomedical Campus,Cambridge,UK	NIHR BioResource, Cambridge University Hospitals NHS Foundation, Cambridge Biomedical Campus,Cambridge,UK
Hannah	Stark	Department of Public Health and Primary Care, University of Cambridge,Cambridge,UK	NIHR BioResource, Cambridge University Hospitals NHS Foundation, Cambridge Biomedical Campus,Cambridge,UK
Kathleen E	Stirrups	Department of Haematology, University of Cambridge, Cambridge Biomedical Campus,Cambridge,UK	NIHR BioResource, Cambridge University Hospitals NHS Foundation, Cambridge Biomedical Campus,Cambridge,UK
Marijcke W M	Veltman	Department of Haematology, University of Cambridge, Cambridge Biomedical Campus,Cambridge,UK	NIHR BioResource, Cambridge University Hospitals NHS Foundation, Cambridge Biomedical Campus,Cambridge,UK
Timothy	Young	Department of Haematology, University of Cambridge, Cambridge Biomedical Campus,Cambridge,UK	NIHR BioResource, Cambridge University Hospitals NHS Foundation, Cambridge Biomedical Campus,Cambridge,UK
Enrolment and Ethics
Sofie	Ashford	Department of Public Health and Primary Care, University of Cambridge,Cambridge,UK	NIHR BioResource, Cambridge University Hospitals NHS Foundation, Cambridge Biomedical Campus,Cambridge,UK
Lindsey	Berends	Department of Haematology, University of Cambridge, Cambridge Biomedical Campus,Cambridge,UK	NIHR BioResource, Cambridge University Hospitals NHS Foundation, Cambridge Biomedical Campus,Cambridge,UK
Matthew	Brown	Department of Haematology, University of Cambridge, Cambridge Biomedical Campus,Cambridge,UK	NIHR BioResource, Cambridge University Hospitals NHS Foundation, Cambridge Biomedical Campus,Cambridge,UK
Naomi	Clements Brod	Department of Haematology, University of Cambridge, Cambridge Biomedical Campus,Cambridge,UK	NIHR BioResource, Cambridge University Hospitals NHS Foundation, Cambridge Biomedical Campus,Cambridge,UK
John	Davis	Department of Haematology, University of Cambridge, Cambridge Biomedical Campus,Cambridge,UK	NIHR BioResource, Cambridge University Hospitals NHS Foundation, Cambridge Biomedical Campus,Cambridge,UK
Eleanor F	Dewhurst	Department of Haematology, University of Cambridge, Cambridge Biomedical Campus,Cambridge,UK	NIHR BioResource, Cambridge University Hospitals NHS Foundation, Cambridge Biomedical Campus,Cambridge,UK
Helen	Dolling	Department of Haematology, University of Cambridge, Cambridge Biomedical Campus,Cambridge,UK	NIHR BioResource, Cambridge University Hospitals NHS Foundation, Cambridge Biomedical Campus,Cambridge,UK
Marie	Erwood	Department of Haematology, University of Cambridge, Cambridge Biomedical Campus,Cambridge,UK	NIHR BioResource, Cambridge University Hospitals NHS Foundation, Cambridge Biomedical Campus,Cambridge,UK
Amy J	Frary	Department of Haematology, University of Cambridge, Cambridge Biomedical Campus,Cambridge,UK	NIHR BioResource, Cambridge University Hospitals NHS Foundation, Cambridge Biomedical Campus,Cambridge,UK
Rachel	Linger	Department of Public Health and Primary Care, University of Cambridge,Cambridge,UK	NIHR BioResource, Cambridge University Hospitals NHS Foundation, Cambridge Biomedical Campus,Cambridge,UK
Jennifer	Martin	Department of Public Health and Primary Care, University of Cambridge,Cambridge,UK	NIHR BioResource, Cambridge University Hospitals NHS Foundation, Cambridge Biomedical Campus,Cambridge,UK	Department of Medicine, School of Clinical Medicine, University of Cambridge, Cambridge Biomedical Campus,Cambridge,UK
Sofia	Papadia	Department of Public Health and Primary Care, University of Cambridge,Cambridge,UK	NIHR BioResource, Cambridge University Hospitals NHS Foundation, Cambridge Biomedical Campus,Cambridge,UK
Karola	Rehnstrom	Department of Haematology, University of Cambridge, Cambridge Biomedical Campus,Cambridge,UK	NIHR BioResource, Cambridge University Hospitals NHS Foundation, Cambridge Biomedical Campus,Cambridge,UK
Crina	Samarghitean	Department of Haematology, University of Cambridge, Cambridge Biomedical Campus,Cambridge,UK	NIHR BioResource, Cambridge University Hospitals NHS Foundation, Cambridge Biomedical Campus,Cambridge,UK
Emily	Staples	Department of Medicine, School of Clinical Medicine, University of Cambridge, Cambridge Biomedical Campus,Cambridge,UK
Hannah	Stark	Department of Public Health and Primary Care, University of Cambridge,Cambridge,UK	NIHR BioResource, Cambridge University Hospitals NHS Foundation, Cambridge Biomedical Campus,Cambridge,UK
Katherine	Yates	Department of Medicine, School of Clinical Medicine, University of Cambridge, Cambridge Biomedical Campus,Cambridge,UK	Department of Haematology, University of Cambridge, Cambridge Biomedical Campus,Cambridge,UK	NIHR BioResource, Cambridge University Hospitals NHS Foundation, Cambridge Biomedical Campus,Cambridge,UK
Clinical Bioinformatics
Csaba	Halmagyi	Department of Haematology, University of Cambridge, Cambridge Biomedical Campus,Cambridge,UK	NIHR BioResource, Cambridge University Hospitals NHS Foundation, Cambridge Biomedical Campus,Cambridge,UK
Roger	James	Department of Haematology, University of Cambridge, Cambridge Biomedical Campus,Cambridge,UK	NIHR BioResource, Cambridge University Hospitals NHS Foundation, Cambridge Biomedical Campus,Cambridge,UK
Vera	Matser	Department of Haematology, University of Cambridge, Cambridge Biomedical Campus,Cambridge,UK	NIHR BioResource, Cambridge University Hospitals NHS Foundation, Cambridge Biomedical Campus,Cambridge,UK
Catherine	Titterton	Department of Haematology, University of Cambridge, Cambridge Biomedical Campus,Cambridge,UK	NIHR BioResource, Cambridge University Hospitals NHS Foundation, Cambridge Biomedical Campus,Cambridge,UK
Julie	von Ziegenweidt	Department of Haematology, University of Cambridge, Cambridge Biomedical Campus,Cambridge,UK	NIHR BioResource, Cambridge University Hospitals NHS Foundation, Cambridge Biomedical Campus,Cambridge,UK
Ping	Yu	Department of Haematology, University of Cambridge, Cambridge Biomedical Campus,Cambridge,UK	NIHR BioResource, Cambridge University Hospitals NHS Foundation, Cambridge Biomedical Campus,Cambridge,UK
Sample Processing
Anthony	Attwood	Department of Haematology, University of Cambridge, Cambridge Biomedical Campus,Cambridge,UK	NIHR BioResource, Cambridge University Hospitals NHS Foundation, Cambridge Biomedical Campus,Cambridge,UK
Abigail	Crisp-Hihn	Department of Haematology, University of Cambridge, Cambridge Biomedical Campus,Cambridge,UK	NIHR BioResource, Cambridge University Hospitals NHS Foundation, Cambridge Biomedical Campus,Cambridge,UK
Karen	Edwards	Department of Haematology, University of Cambridge, Cambridge Biomedical Campus,Cambridge,UK	NIHR BioResource, Cambridge University Hospitals NHS Foundation, Cambridge Biomedical Campus,Cambridge,UK
James	Fox	Department of Haematology, University of Cambridge, Cambridge Biomedical Campus,Cambridge,UK	NIHR BioResource, Cambridge University Hospitals NHS Foundation, Cambridge Biomedical Campus,Cambridge,UK
Jennifer	Jolley	Department of Haematology, University of Cambridge, Cambridge Biomedical Campus,Cambridge,UK	NIHR BioResource, Cambridge University Hospitals NHS Foundation, Cambridge Biomedical Campus,Cambridge,UK
Rutendo	Mapeta	Department of Haematology, University of Cambridge, Cambridge Biomedical Campus,Cambridge,UK	NIHR BioResource, Cambridge University Hospitals NHS Foundation, Cambridge Biomedical Campus,Cambridge,UK
Paula J	Rayner-Matthews	Department of Haematology, University of Cambridge, Cambridge Biomedical Campus,Cambridge,UK	NIHR BioResource, Cambridge University Hospitals NHS Foundation, Cambridge Biomedical Campus,Cambridge,UK
Ilenia	Simeoni	Department of Haematology, University of Cambridge, Cambridge Biomedical Campus,Cambridge,UK	NIHR BioResource, Cambridge University Hospitals NHS Foundation, Cambridge Biomedical Campus,Cambridge,UK
Simon	Staines	Department of Haematology, University of Cambridge, Cambridge Biomedical Campus,Cambridge,UK	NIHR BioResource, Cambridge University Hospitals NHS Foundation, Cambridge Biomedical Campus,Cambridge,UK
Jonathan	Stephens	Department of Haematology, University of Cambridge, Cambridge Biomedical Campus,Cambridge,UK	NIHR BioResource, Cambridge University Hospitals NHS Foundation, Cambridge Biomedical Campus,Cambridge,UK
Kathleen E	Stirrups	Department of Haematology, University of Cambridge, Cambridge Biomedical Campus,Cambridge,UK	NIHR BioResource, Cambridge University Hospitals NHS Foundation, Cambridge Biomedical Campus,Cambridge,UK
Christopher	Watt	Department of Haematology, University of Cambridge, Cambridge Biomedical Campus,Cambridge,UK	NIHR BioResource, Cambridge University Hospitals NHS Foundation, Cambridge Biomedical Campus,Cambridge,UK
Deborah	Whitehorn	Department of Haematology, University of Cambridge, Cambridge Biomedical Campus,Cambridge,UK	NIHR BioResource, Cambridge University Hospitals NHS Foundation, Cambridge Biomedical Campus,Cambridge,UK
Yvette	Wood	Department of Haematology, University of Cambridge, Cambridge Biomedical Campus,Cambridge,UK	NIHR BioResource, Cambridge University Hospitals NHS Foundation, Cambridge Biomedical Campus,Cambridge,UK
Bioinformatic Data Processing
Sri V V	Deevi	Department of Haematology, University of Cambridge, Cambridge Biomedical Campus,Cambridge,UK	NIHR BioResource, Cambridge University Hospitals NHS Foundation, Cambridge Biomedical Campus,Cambridge,UK
Fengyuan	Hu	Department of Haematology, University of Cambridge, Cambridge Biomedical Campus,Cambridge,UK	NIHR BioResource, Cambridge University Hospitals NHS Foundation, Cambridge Biomedical Campus,Cambridge,UK
Stuart	Meacham	Department of Haematology, University of Cambridge, Cambridge Biomedical Campus,Cambridge,UK	NIHR BioResource, Cambridge University Hospitals NHS Foundation, Cambridge Biomedical Campus,Cambridge,UK
Christopher J	Penkett	Department of Haematology, University of Cambridge, Cambridge Biomedical Campus,Cambridge,UK	NIHR BioResource, Cambridge University Hospitals NHS Foundation, Cambridge Biomedical Campus,Cambridge,UK
Olga	Shamardina	Department of Haematology, University of Cambridge, Cambridge Biomedical Campus,Cambridge,UK	NIHR BioResource, Cambridge University Hospitals NHS Foundation, Cambridge Biomedical Campus,Cambridge,UK
Salih	Tuna	Department of Haematology, University of Cambridge, Cambridge Biomedical Campus,Cambridge,UK	NIHR BioResource, Cambridge University Hospitals NHS Foundation, Cambridge Biomedical Campus,Cambridge,UK
Clinical Interpretation
Louise C	Daugherty	Department of Haematology, University of Cambridge, Cambridge Biomedical Campus,Cambridge,UK	NIHR BioResource, Cambridge University Hospitals NHS Foundation, Cambridge Biomedical Campus,Cambridge,UK	Genomics England, Charterhouse Square,London,UK
Sri V V	Deevi	Department of Haematology, University of Cambridge, Cambridge Biomedical Campus,Cambridge,UK	NIHR BioResource, Cambridge University Hospitals NHS Foundation, Cambridge Biomedical Campus,Cambridge,UK
Kate	Downes	Department of Haematology, University of Cambridge, Cambridge Biomedical Campus,Cambridge,UK	NIHR BioResource, Cambridge University Hospitals NHS Foundation, Cambridge Biomedical Campus,Cambridge,UK
Daniel	Duarte	Department of Haematology, University of Cambridge, Cambridge Biomedical Campus,Cambridge,UK	NIHR BioResource, Cambridge University Hospitals NHS Foundation, Cambridge Biomedical Campus,Cambridge,UK
Rutendo	Mapeta	Department of Haematology, University of Cambridge, Cambridge Biomedical Campus,Cambridge,UK	NIHR BioResource, Cambridge University Hospitals NHS Foundation, Cambridge Biomedical Campus,Cambridge,UK
Karyn	Megy	Department of Haematology, University of Cambridge, Cambridge Biomedical Campus,Cambridge,UK	NIHR BioResource, Cambridge University Hospitals NHS Foundation, Cambridge Biomedical Campus,Cambridge,UK
Willem H	Ouwehand	Department of Haematology, University of Cambridge, Cambridge Biomedical Campus,Cambridge,UK	NIHR BioResource, Cambridge University Hospitals NHS Foundation, Cambridge Biomedical Campus,Cambridge,UK	Wellcome Sanger Institute, Wellcome Genome Campus, Hinxton,Cambridge,UK	NHS Blood and Transplant, Cambridge Biomedical Campus,Cambridge,UK	British Heart Foundation Cambridge Centre of Excellence, University of Cambridge,Cambridge,UK
F Lucy	Raymond	Department of Medical Genetics, Cambridge Institute for Medical Research, University of Cambridge, Cambridge Biomedical Campus,Cambridge,UK	NIHR BioResource, Cambridge University Hospitals NHS Foundation, Cambridge Biomedical Campus,Cambridge,UK
Ilenia	Simeoni	Department of Haematology, University of Cambridge, Cambridge Biomedical Campus,Cambridge,UK	NIHR BioResource, Cambridge University Hospitals NHS Foundation, Cambridge Biomedical Campus,Cambridge,UK
Bioinformatic Data Analysis
William J	Astle	Department of Haematology, University of Cambridge, Cambridge Biomedical Campus,Cambridge,UK	NIHR BioResource, Cambridge University Hospitals NHS Foundation, Cambridge Biomedical Campus,Cambridge,UK	MRC Biostatistics Unit, Cambridge Institute of Public Health, University of Cambridge,Cambridge,UK	MRC Toxicology Unit, School of Biological Sciences, University of Cambridge,Cambridge,UK
Marta	Bleda	Department of Medicine, School of Clinical Medicine, University of Cambridge, Cambridge Biomedical Campus,Cambridge,UK
Keren	Carss	Department of Haematology, University of Cambridge, Cambridge Biomedical Campus,Cambridge,UK	NIHR BioResource, Cambridge University Hospitals NHS Foundation, Cambridge Biomedical Campus,Cambridge,UK
Stefan	Gräf	Department of Medicine, School of Clinical Medicine, University of Cambridge, Cambridge Biomedical Campus,Cambridge,UK	Department of Haematology, University of Cambridge, Cambridge Biomedical Campus,Cambridge,UK	NIHR BioResource, Cambridge University Hospitals NHS Foundation, Cambridge Biomedical Campus,Cambridge,UK
Daniel	Greene	Department of Haematology, University of Cambridge, Cambridge Biomedical Campus,Cambridge,UK	NIHR BioResource, Cambridge University Hospitals NHS Foundation, Cambridge Biomedical Campus,Cambridge,UK	MRC Biostatistics Unit, Cambridge Institute of Public Health, University of Cambridge,Cambridge,UK
Matthias	Haimel	Department of Medicine, School of Clinical Medicine, University of Cambridge, Cambridge Biomedical Campus,Cambridge,UK	Department of Haematology, University of Cambridge, Cambridge Biomedical Campus,Cambridge,UK	NIHR BioResource, Cambridge University Hospitals NHS Foundation, Cambridge Biomedical Campus,Cambridge,UK
Hana	Lango Allen	Department of Haematology, University of Cambridge, Cambridge Biomedical Campus,Cambridge,UK	NIHR BioResource, Cambridge University Hospitals NHS Foundation, Cambridge Biomedical Campus,Cambridge,UK
Karyn	Megy	Department of Haematology, University of Cambridge, Cambridge Biomedical Campus,Cambridge,UK	NIHR BioResource, Cambridge University Hospitals NHS Foundation, Cambridge Biomedical Campus,Cambridge,UK
Alba	Sanchis-Juan	Department of Haematology, University of Cambridge, Cambridge Biomedical Campus,Cambridge,UK	NIHR BioResource, Cambridge University Hospitals NHS Foundation, Cambridge Biomedical Campus,Cambridge,UK
Ernest	Turro	Department of Haematology, University of Cambridge, Cambridge Biomedical Campus,Cambridge,UK	NIHR BioResource, Cambridge University Hospitals NHS Foundation, Cambridge Biomedical Campus,Cambridge,UK	MRC Biostatistics Unit, Cambridge Institute of Public Health, University of Cambridge,Cambridge,UK
Eliska	Zlamalova	Department of Haematology, University of Cambridge, Cambridge Biomedical Campus,Cambridge,UK
MRC Biostatistics Unit
William J	Astle	Department of Haematology, University of Cambridge, Cambridge Biomedical Campus,Cambridge,UK	NIHR BioResource, Cambridge University Hospitals NHS Foundation, Cambridge Biomedical Campus,Cambridge,UK	MRC Biostatistics Unit, Cambridge Institute of Public Health, University of Cambridge,Cambridge,UK	MRC Toxicology Unit, School of Biological Sciences, University of Cambridge,Cambridge,UK
Daniel	Greene	Department of Haematology, University of Cambridge, Cambridge Biomedical Campus,Cambridge,UK	NIHR BioResource, Cambridge University Hospitals NHS Foundation, Cambridge Biomedical Campus,Cambridge,UK	MRC Biostatistics Unit, Cambridge Institute of Public Health, University of Cambridge,Cambridge,UK
Sylvia	Richardson	MRC Biostatistics Unit, Cambridge Institute of Public Health, University of Cambridge,Cambridge,UK
Ernest	Turro	Department of Haematology, University of Cambridge, Cambridge Biomedical Campus,Cambridge,UK	NIHR BioResource, Cambridge University Hospitals NHS Foundation, Cambridge Biomedical Campus,Cambridge,UK	MRC Biostatistics Unit, Cambridge Institute of Public Health, University of Cambridge,Cambridge,UK
High Performance Computing Service
Paul	Calleja	High Performance Computing Service, University of Cambridge,Cambridge,UK
Robert	Klima	High Performance Computing Service, University of Cambridge,Cambridge,UK
Ignacio	Medina Castello	High Performance Computing Service, University of Cambridge,Cambridge,UK
Stuart	Rankin	High Performance Computing Service, University of Cambridge,Cambridge,UK
Wojciech	Turek	High Performance Computing Service, University of Cambridge,Cambridge,UK
EBI
Jeff	Almeida-King	European Molecular Biology Laboratory, European Bioinformatics Institute (EMBL-EBI), Wellcome Genome Campus, Hinxton,Cambridge,UK
Giselle	Kerry	European Molecular Biology Laboratory, European Bioinformatics Institute (EMBL-EBI), Wellcome Genome Campus, Hinxton,Cambridge,UK
Aoife	McMahon	European Molecular Biology Laboratory, European Bioinformatics Institute (EMBL-EBI), Wellcome Genome Campus, Hinxton,Cambridge,UK
Joannella	Morales	European Molecular Biology Laboratory, European Bioinformatics Institute (EMBL-EBI), Wellcome Genome Campus, Hinxton,Cambridge,UK
Steering Commitee
Gerome	Breen	MRC Social, Genetic & Developmental Psychiatry Centre, Institute of Psychiatry, Psychology & Neuroscience, King's College London,London,UK	NIHR Biomedical Research Centre for Mental Health, Maudsley Hospital,London,UK
John	Chambers	Lee Kong Chian School of Medicine, Nanyang Technological University,Singapore,Singapore	Department of Epidemiology and Biostatistics, Imperial College London,London,UK	Department of Cardiology, Ealing Hospital,Middlesex,UK	Imperial College Healthcare NHS Trust,London,UK	MRC-PHE Centre for Environment and Health, Imperial College London,London,UK
Matthew	Hurles	Wellcome Sanger Institute, Wellcome Genome Campus, Hinxton,Cambridge,UK
Nathalie	Kingston	NIHR BioResource, Cambridge University Hospitals NHS Foundation, Cambridge Biomedical Campus,Cambridge,UK
Mark I	McCarthy	Oxford Centre for Diabetes, Endocrinology and Metabolism, University of Oxford, Churchill Hospital,Oxford,UK	Wellcome Centre for Human Genetics, University of Oxford,Oxford,UK	NIHR Oxford Biomedical Research Centre, Oxford University Hospitals Trust,Oxford,UK
Willem H	Ouwehand	Department of Haematology, University of Cambridge, Cambridge Biomedical Campus,Cambridge,UK	NIHR BioResource, Cambridge University Hospitals NHS Foundation, Cambridge Biomedical Campus,Cambridge,UK	Wellcome Sanger Institute, Wellcome Genome Campus, Hinxton,Cambridge,UK	NHS Blood and Transplant, Cambridge Biomedical Campus,Cambridge,UK	British Heart Foundation Cambridge Centre of Excellence, University of Cambridge,Cambridge,UK
F Lucy	Raymond	Department of Medical Genetics, Cambridge Institute for Medical Research, University of Cambridge, Cambridge Biomedical Campus,Cambridge,UK	NIHR BioResource, Cambridge University Hospitals NHS Foundation, Cambridge Biomedical Campus,Cambridge,UK
Nilesh	Samani	Department of Cardiovascular Sciences and NIHR Leicester Biomedical Research Research Centre, University of Leicester,Leicester,UK
Michael	Simpson	Genetics and Molecular Medicine, King's College London,London,UK
Nicholas	Wood	Department of Molecular Neuroscience, UCL Institute of Neurology,London,UK	UCL Genetics Institute,London,UK
Administrative Support
Julie	Anderson	Department of Haematology, University of Cambridge, Cambridge Biomedical Campus,Cambridge,UK	NIHR BioResource, Cambridge University Hospitals NHS Foundation, Cambridge Biomedical Campus,Cambridge,UK
Christine	Bryson	Department of Haematology, University of Cambridge, Cambridge Biomedical Campus,Cambridge,UK	NIHR BioResource, Cambridge University Hospitals NHS Foundation, Cambridge Biomedical Campus,Cambridge,UK
Debra	Fletcher	Department of Haematology, University of Cambridge, Cambridge Biomedical Campus,Cambridge,UK	NIHR BioResource, Cambridge University Hospitals NHS Foundation, Cambridge Biomedical Campus,Cambridge,UK
Tracey	Hammerton	Department of Haematology, University of Cambridge, Cambridge Biomedical Campus,Cambridge,UK	NIHR BioResource, Cambridge University Hospitals NHS Foundation, Cambridge Biomedical Campus,Cambridge,UK
Coleen	McJannet	Department of Haematology, University of Cambridge, Cambridge Biomedical Campus,Cambridge,UK	NIHR BioResource, Cambridge University Hospitals NHS Foundation, Cambridge Biomedical Campus,Cambridge,UK
Sophie	Stock	Department of Haematology, University of Cambridge, Cambridge Biomedical Campus,Cambridge,UK	NIHR BioResource, Cambridge University Hospitals NHS Foundation, Cambridge Biomedical Campus,Cambridge,UK
Lindsey	Walker	Department of Haematology, University of Cambridge, Cambridge Biomedical Campus,Cambridge,UK	NIHR BioResource, Cambridge University Hospitals NHS Foundation, Cambridge Biomedical Campus,Cambridge,UK
Timothy	Young	Department of Haematology, University of Cambridge, Cambridge Biomedical Campus,Cambridge,UK	NIHR BioResource, Cambridge University Hospitals NHS Foundation, Cambridge Biomedical Campus,Cambridge,UK
BPD - Bleeding and Platelet Disorders
Jayanthi	Alamelu	Department of Haematology, Guy's and St Thomas' NHS Foundation Trust,London,UK
Raza	Alikhan	The Arthur Bloom Haemophilia Centre, University Hospital of Wales,Cardiff,UK
David J	Allsup	Queens Centre for Haematology and Oncology, Castle Hill Hospital, Hull and East Yorkshire NHS Trust,Cottingham,UK	Hull York Medical School, University of Hull,Hull,UK
Arif	Alvi	Glasgow Royal Infirmary, NHS Greater Glasgow and Clyde,Glasgow,UK
Steve	Austin	Department of Haematology, Guy's and St Thomas' NHS Foundation Trust,London,UK
Trevor	Baglin	Addenbrookes Hospital, Cambridge University Hospitals NHS Foundation Trust,Cambridge,UK
Tamam	Bakchoul	Center for Clinical Transfusion Medicine, University Hospital of Tübingen,Tübingen,Germany
Tadbir	Bariana	The Katharine Dormandy Haemophilia Centre and Thrombosis Unit, Royal Free London NHS Foundation Trust,London,UK	University College London,London,UK
Gareth	Baynam	School of Paediatrics and Child Health, University of Western Australia,Perth,Australia	Genetic Services of Western Australia, Western Australian Register of Developmental Anomalies and Office of Population Health Genomics, Public and Aboriginal Health Division, Western Australian Department of Health,Perth,Australia	Genetic and Rare Diseases Program, Telethon Kids Institute,Perth,Australia
Neha	Bhatnagar	Oxford Haemophilia and Thrombosis Centre, The Churchill Hospital, Oxford University Hospitals NHS Trust,Oxford,UK
Tina	Biss	Haematology Department, Royal Victoria Infirmary, The Newcastle upon Tyne Hospitals NHS Foundation Trust,Newcastle upon Tyne,UK
Sara	Boyce	Southampton General Hospital, University Hospital Southampton NHS Foundation Trust,Southampton,UK
Elizabeth	Chalmers	Royal Hospital for Children, NHS Greater Glasgow and Clyde,Glasgow,UK
Melissa V	Chan	Blizard Institute, Barts and The London School of Medicine & Dentistry, Queen Mary University of London,London,UK
Janine	Collins	The Royal London Hospital, Barts Health NHS Foundation Trust,London,UK	Department of Haematology, University of Cambridge, Cambridge Biomedical Campus,Cambridge,UK
Peter W	Collins	Institute of Infection and Immunity, School of Medicine Cardiff University,Cardiff,UK
Nicola S	Curry	Oxford Haemophilia and Thrombosis Centre, Oxford University Hospitals NHS Trust, Oxford Comprehensive Biomedical Research Centre,Oxford,UK
Kate	Downes	Department of Haematology, University of Cambridge, Cambridge Biomedical Campus,Cambridge,UK	NIHR BioResource, Cambridge University Hospitals NHS Foundation, Cambridge Biomedical Campus,Cambridge,UK
Tina	Dutt	The Roald Dahl Haemostasis and Thrombosis Centre, The Royal Liverpool University Hospital,Liverpool,UK
Wendy N	Erber	Medical School and School of Biomedical Sciences, Faculty of Health and Medical Sciences, The University of Western Australia,Crawley,Australia
Gillian	Evans	Haemophilia Centre, Kent & Canterbury Hospital, East Kent Hospitals University Foundation Trust,Canterbury,UK
Tamara	Everington	Salisbury District Hospital, Salisbury NHS Foundation Trust,Salisbury,UK	Haemophilia, Haemostasis and Thrombosis Centre, Hampshire Hospitals NHS Foundation Trust,Basingstoke,UK
Remi	Favier	INSERM UMR 1170, Gustave Roussy Cancer Campus, Universite Paris-Saclay,Villejuif,France	Service d'Hematologie biologique, Centre de Reference des Pathologies Plaquettaires, Hopital Armand Trousseau, Assistance Publique-Hopitaux de Paris,Paris,France
Kathleen	Freson	Department of Cardiovascular Sciences, Center for Molecular and Vascular Biology, KULeuven,Leuven,Belgium
Bruce	Furie	Beth Israel Deaconess Medical Centre and Harvard Medical School,Boston,USA
Michael	Gattens	Addenbrookes Hospital, Cambridge University Hospitals NHS Foundation Trust,Cambridge,UK
Keith	Gomez	The Katharine Dormandy Haemophilia Centre and Thrombosis Unit, Royal Free London NHS Foundation Trust,London,UK	University College London,London,UK
Daniel	Greene	Department of Haematology, University of Cambridge, Cambridge Biomedical Campus,Cambridge,UK	NIHR BioResource, Cambridge University Hospitals NHS Foundation, Cambridge Biomedical Campus,Cambridge,UK	MRC Biostatistics Unit, Cambridge Institute of Public Health, University of Cambridge,Cambridge,UK
Andreas	Greinacher	Institute for Immunology and Transfusion Medicine, University Medicine Greifswald,Greifswald,Germany
Paolo	Gresele	Section of Internal and Cardiovascular Medicine, University of Perugia,Perugia,Italy
Daniel	Hart	The Royal London Hospital, Barts Health NHS Foundation Trust,London,UK
Yvonne M C	Henskens	Maastricht University Medical Centre,Maastricht,The Netherlands
Rashid	Kazmi	Southampton General Hospital, University Hospital Southampton NHS Foundation Trust,Southampton,UK
David	Keeling	Oxford Haemophilia and Thrombosis Centre, The Churchill Hospital, Oxford University Hospitals NHS Trust,Oxford,UK
Anne M	Kelly	Addenbrookes Hospital, Cambridge University Hospitals NHS Foundation Trust,Cambridge,UK
Michael A	Laffan	Department of Haematology, Hammersmith Hospital, Imperial College Healthcare NHS Trust,London,UK	Centre for Haematology, Imperial College London,London,UK
Michele	Lambert	Division of Hematology, The Children's Hospital of Philadelphia,Philadelphia,USA	Department of Pediatrics, Perelman School of Medicine at the University of Pennsylvania,Philadelphia,USA
Claire	Lentaigne	Department of Haematology, Hammersmith Hospital, Imperial College Healthcare NHS Trust,London,UK	Centre for Haematology, Imperial College London,London,UK
Ri	Liesner	Department of Haematology, Great Ormond Street Hospital for Children NHS Foundation Trust,London,UK
Bella	Madan	Department of Haematology, Guy's and St Thomas' NHS Foundation Trust,London,UK
Mike	Makris	Royal Hallamshire Hospital NHS Foundation Trust,Sheffield,UK	Department of Infection, Immunity & Cardiovascular Disease, University of Sheffield,Sheffield,UK
Sarah	Mangles	Haemophilia, Haemostasis and Thrombosis Centre, Hampshire Hospitals NHS Foundation Trust,Basingstoke,UK
Mary	Mathias	Department of Haematology, Great Ormond Street Hospital for Children NHS Foundation Trust,London,UK
Carolyn	Millar	Department of Haematology, Hammersmith Hospital, Imperial College Healthcare NHS Trust,London,UK	Centre for Haematology, Imperial College London,London,UK
Andrew D	Mumford	School of Cellular and Molecular Medicine, University of Bristol,Bristol,UK	University Hospitals Bristol NHS Foundation Trust,Bristol,UK
Paquita	Nurden	Institut Hospitalo-Universitaire de Rythmologie et de Modelisation Cardiaque, Plateforme Technologique d'Innovation Biomedicale, Hopital Xavier Arnozan,Pessac,France
Samya	Obaji	The Arthur Bloom Haemophilia Centre, University Hospital of Wales,Cardiff,UK
Willem H	Ouwehand	Department of Haematology, University of Cambridge, Cambridge Biomedical Campus,Cambridge,UK	NIHR BioResource, Cambridge University Hospitals NHS Foundation, Cambridge Biomedical Campus,Cambridge,UK	Wellcome Sanger Institute, Wellcome Genome Campus, Hinxton,Cambridge,UK	NHS Blood and Transplant, Cambridge Biomedical Campus,Cambridge,UK	British Heart Foundation Cambridge Centre of Excellence, University of Cambridge,Cambridge,UK
Sofia	Papadia	Department of Public Health and Primary Care, University of Cambridge,Cambridge,UK	NIHR BioResource, Cambridge University Hospitals NHS Foundation, Cambridge Biomedical Campus,Cambridge,UK
K John	Pasi	Barts and The London School of Medicine and Dentistry, Haemophilia Centre, The Royal London Hospital,London,UK
Jeanette H	Payne	Dept of Haematology, Sheffield Children's Hospital NHS Foundation Trust,Sheffield,UK
Kathelijne	Peerlinck	Department of Cardiovascular Sciences, Center for Molecular and Vascular Biology, KULeuven,Leuven,Belgium
Fernando	Pinto	Royal Hospital for Children, NHS Greater Glasgow and Clyde,Glasgow,UK
Shoshana	Revel-Vilk	Shaare Zedek Medical Center, affiliated with Hebrew-University Medical School,Jerusalem,Israel
Mike	Richards	Leeds Children's Hospital, The Leeds Teaching Hospitals NHS Trust,Leeds,UK
Matthew T	Rondina	Department of Internal Medicine, Eccles Institute of Human Genetics, University of Utah Health Sciences Center,Salt Lake City,USA
Catherine	Roughley	Haemophilia Centre, Kent & Canterbury Hospital, East Kent Hospitals University Foundation Trust,Canterbury,UK
Sol	Schulman	Beth Israel Deaconess Medical Centre and Harvard Medical School,Boston,USA
Harald	Schulze	Experimental Biomedicine, University Hospital Würzburg,Würzburg,Germany
Marie	Scully	University College London Hospitals NHS Foundation Trust,London,UK
Susan E	Shapiro	Oxford Haemophilia and Thrombosis Centre, Oxford University Hospitals NHS Trust, Oxford Comprehensive Biomedical Research Centre,Oxford,UK
Keith	Sibson	Department of Haematology, Great Ormond Street Hospital for Children NHS Foundation Trust,London,UK
Ilenia	Simeoni	Department of Haematology, University of Cambridge, Cambridge Biomedical Campus,Cambridge,UK	NIHR BioResource, Cambridge University Hospitals NHS Foundation, Cambridge Biomedical Campus,Cambridge,UK
Matthew C	Sims	Department of Haematology, University of Cambridge, Cambridge Biomedical Campus,Cambridge,UK	Oxford Haemophilia and Thrombosis Centre, The Churchill Hospital, Oxford University Hospitals NHS Trust,Oxford,UK
Suthesh	Sivapalaratnam	The Royal London Hospital, Barts Health NHS Foundation Trust,London,UK	Department of Haematology, Cambridge University Hospitals NHS Foundation Trust,Cambridge,UK	NHS Blood and Transplant, Cambridge Biomedical Campus,Cambridge,UK	Queen Mary University of London,London,UK
Matthew J	Stubbs	Department of Haematology, Hammersmith Hospital, Imperial College Healthcare NHS Trust,London,UK	Centre for Haematology, Imperial College London,London,UK
R Campbell	Tait	Glasgow Royal Infirmary, NHS Greater Glasgow and Clyde,Glasgow,UK
Kate	Talks	Haematology Department, Royal Victoria Infirmary, The Newcastle upon Tyne Hospitals NHS Foundation Trust,Newcastle upon Tyne,UK
Gordon B	Taylor	Aberdeen Royal Infirmary, NHS Grampian,Aberdeen,UK
Jecko	Thachil	Haematology Department, Manchester Royal Infirmary, Central Manchester University Hospitals National Health Service Foundation Trust, Manchester Academic Health Science Centre,Manchester,UK
Chantal	Thys	Department of Cardiovascular Sciences, Center for Molecular and Vascular Biology, KULeuven,Leuven,Belgium
Cheng-Hock	Toh	The Roald Dahl Haemostasis and Thrombosis Centre, The Royal Liverpool University Hospital,Liverpool,UK
Ernest	Turro	Department of Haematology, University of Cambridge, Cambridge Biomedical Campus,Cambridge,UK	NIHR BioResource, Cambridge University Hospitals NHS Foundation, Cambridge Biomedical Campus,Cambridge,UK	MRC Biostatistics Unit, Cambridge Institute of Public Health, University of Cambridge,Cambridge,UK
Chris	Van Geet	Department of Cardiovascular Sciences, Center for Molecular and Vascular Biology, KULeuven,Leuven,Belgium
Minka J A	Vries	Maastricht University Medical Centre,Maastricht,The Netherlands
Timothy	Warner	Barts Health NHS Foundation Trust,London,UK
Henry G	Watson	Aberdeen Royal Infirmary, NHS Grampian,Aberdeen,UK
Sarah K	Westbury	School of Cellular and Molecular Medicine, University of Bristol,Bristol,UK	University Hospitals Bristol NHS Foundation Trust,Bristol,UK
John-Paul	Westwood	University College London Hospitals NHS Foundation Trust,London,UK
CSVD - Cerebral Small Vessel Disease
Julian	Barwell	Department of Clinical Genetics, Leicester Royal Infirmary, University Hospitals of Leicester,Leicester,UK	University of Leicester,Leicester,UK
Anand	Dixit	Newcastle upon Tyne Hospitals NHS Foundation Trust,Newcastle upon Tyne,UK
Kate	Downes	Department of Haematology, University of Cambridge, Cambridge Biomedical Campus,Cambridge,UK	NIHR BioResource, Cambridge University Hospitals NHS Foundation, Cambridge Biomedical Campus,Cambridge,UK
Anna M	Drazyk	Stroke Research Group, Department of Clinical Neurosciences, University of Cambridge, Cambridge Biomedical Campus,Cambridge,UK
Stefan	Gräf	Department of Medicine, School of Clinical Medicine, University of Cambridge, Cambridge Biomedical Campus,Cambridge,UK	Department of Haematology, University of Cambridge, Cambridge Biomedical Campus,Cambridge,UK	NIHR BioResource, Cambridge University Hospitals NHS Foundation, Cambridge Biomedical Campus,Cambridge,UK
Kirsty	Harkness	Department of Neurology, Sheffield Teaching Hospitals NHS Foundation Trust,Sheffield,UK
Ahamad	Hassan	Department of Neurology, Leeds Teaching Hospital NHS Trust,Leeds,UK
Hugh S	Markus	Stroke Research Group, Department of Clinical Neurosciences, University of Cambridge, Cambridge Biomedical Campus,Cambridge,UK
Sarju	Mehta	Department of Clinical Genetics, Addenbrookes Hospital, Cambridge University Hospitals NHS Foundation Trust,Cambridge,UK
Keith W	Muir	Institute of Neuroscience and Psychology, University of Glasgow,Glasgow,UK
Bartlomiej	Piechowski-Jozwiak	King's College Hospital NHS Foundation Trust,London,UK
Julia	Rankin	Royal Devon and Exeter NHS Foundation Trust,Exeter,UK
Emma E	Richards	Department of Neurology, Sheffield Teaching Hospitals NHS Foundation Trust,Sheffield,UK
Peter	Rothwell	Stroke Prevention Research Unit, University of Oxford,Oxford,UK
Pankaj	Sharma	Institute of Cardiovascular Research Royal Holloway University of London (ICR2UL),London,UK
Rhea Y Y	Tan	Stroke Research Group, Department of Clinical Neurosciences, University of Cambridge, Cambridge Biomedical Campus,Cambridge,UK
Matthew	Traylor	Stroke Research Group, Department of Clinical Neurosciences, University of Cambridge, Cambridge Biomedical Campus,Cambridge,UK
Sarah	Trippier	St George's University Hospitals NHS Foundation Trust,London,UK
Dean	Waugh	Department of Neurology, Leeds Teaching Hospital NHS Trust,Leeds,UK
Angela	Welch	Institute of Neuroscience and Psychology, University of Glasgow,Glasgow,UK
David	Werring	University College London Hospitals NHS Foundation Trust,London,UK
EDS - Ehler-Danlos(ED) and ED-like Syndromes
Munaza	Ahmed	North East Thames Regional Genetics Service, Great Ormond Street Hospital for Children NHS Foundation Trust,London,UK
Timothy J	Aitman	MRC Clinical Sciences Centre, Faculty of Medicine, Imperial College London,London,UK	Institute of Genetics and Molecular Medicine, University of Edinburgh,Edinburgh,UK
Natalie	Canham	North West Thames Regional Genetic Service, London North West University Healthcare NHS Trust,Harrow,UK	Department of Clinical Genetics, Liverpool Women's NHS Foundation,Liverpool,UK
Alex	Henderson	Northern Genetics Service, Newcastle upon Tyne Hospitals NHS Foundation Trust,Newcastle upon Tyne,UK
Hanadi	Kazkaz	University College London Hospitals NHS Foundation Trust,London,UK
Catherine L	Mercer	Southampton General Hospital, University Hospital Southampton NHS Foundation Trust,Southampton,UK
David	Parry	Institute of Genetics and Molecular Medicine, University of Edinburgh,Edinburgh,UK
Miranda	Splitt	Newcastle upon Tyne Hospitals NHS Foundation Trust,Newcastle upon Tyne,UK
Anthony M	Vandersteen	Division of Medical Genetics, IWK Health Centre, Dalhousie University,Halifax,Canada
HCM - Hypertrophic Cardiomyopathy
John	Baski	National Heart and Lung Institute, Imperial College London,London,UK	Royal Brompton Hospital, Royal Brompton and Harefield NHS Foundation Trust,London,UK
Rachel	Bates	Oxford University Hospitals NHS Foundation Trust,Oxford,UK
Paul	Brennan	Newcastle University,Newcastle upon Tyne,UK	Newcastle upon Tyne Hospitals NHS Foundation Trust,Newcastle upon Tyne,UK	Northern Genetics Service, Newcastle upon Tyne Hospitals NHS Foundation Trust,Newcastle upon Tyne,UK
Rachel J	Buchan	National Heart and Lung Institute, Imperial College London,London,UK	Royal Brompton Hospital, Royal Brompton and Harefield NHS Foundation Trust,London,UK
Teofila	Bueser	King's College London,London,UK	Clinical Genetics Department, Guy's and St Thomas NHS Foundation Trust,London,UK	King's College Hospital NHS Foundation Trust,London,UK
Gerald	Carr-White	Guy's and St Thomas' Hospital, Guy's and St Thomas' NHS Foundation Trust,London,UK
Stuart	Cook	National Heart and Lung Institute, Imperial College London,London,UK	MRC London Institute of Medical Sciences, Imperial College London,London,UK	National Heart Research Institute Singapore, National Heart Centre Singapore,Singapore,Singapore	Division of Cardiovascular & Metabolic Disorders, Duke-National University of Singapore,Singapore,Singapore
Matthew J	Daniels	Department of Cardiovascular Medicine, Radcliffe Department of Medicine, University of Oxford,Oxford,UK	Oxford University Hospitals NHS Foundation Trust,Oxford,UK	Department of Biotechnology, Graduate School of Engineering, Osaka University, Suita,Osaka,Japan
Timothy	Dent	Oxford University Hospitals NHS Foundation Trust,Oxford,UK
Andrew R	Harper	Department of Cardiovascular Medicine, Radcliffe Department of Medicine, University of Oxford,Oxford,UK	Wellcome Centre for Human Genetics, University of Oxford,Oxford,UK	Oxford University Hospitals NHS Foundation Trust,Oxford,UK
Alex	Henderson	Northern Genetics Service, Newcastle upon Tyne Hospitals NHS Foundation Trust,Newcastle upon Tyne,UK
Anna C	Michell	Oxford University Hospitals NHS Foundation Trust,Oxford,UK	Department of Cardiovascular Medicine, Radcliffe Department of Medicine, University of Oxford,Oxford,UK
Elizabeth	Ormondroyd	Department of Cardiovascular Medicine, Radcliffe Department of Medicine, University of Oxford,Oxford,UK	Oxford University Hospitals NHS Foundation Trust,Oxford,UK
Antonis	Pantazis	Royal Brompton Hospital, Royal Brompton and Harefield NHS Foundation Trust,London,UK
Georgina	Parsons	Oxford University Hospitals NHS Foundation Trust,Oxford,UK
Sanjay	Prasad	National Heart and Lung Institute, Imperial College London,London,UK	Royal Brompton Hospital, Royal Brompton and Harefield NHS Foundation Trust,London,UK
Leema	Robert	Clinical Genetics Department, Guy's and St Thomas NHS Foundation Trust,London,UK
Linda	Sneddon	Newcastle University,Newcastle upon Tyne,UK
Kate	Thomson	Department of Cardiovascular Medicine, Radcliffe Department of Medicine, University of Oxford,Oxford,UK	Oxford University Hospitals NHS Foundation Trust,Oxford,UK
Roddy	Walsh	National Heart and Lung Institute, Imperial College London,London,UK	Royal Brompton Hospital, Royal Brompton and Harefield NHS Foundation Trust,London,UK
James S	Ware	National Heart and Lung Institute, Imperial College London,London,UK	Royal Brompton Hospital, Royal Brompton and Harefield NHS Foundation Trust,London,UK	MRC London Institute of Medical Sciences, Imperial College London,London,UK
Hugh	Watkins	Department of Cardiovascular Medicine, Radcliffe Department of Medicine, University of Oxford,Oxford,UK	Wellcome Centre for Human Genetics, University of Oxford,Oxford,UK	Oxford University Hospitals NHS Foundation Trust,Oxford,UK
ICP - Intrahepatic Cholestasis of Pregnancy
Irshad	Ahmed	Birmingham Heartlands Hospital, University Hospitals Birmingham NHS Foundation Trust,Birmingham,UK
Rita	Arya	Warrington and Halton Hospitals NHS Foundation Trust,Warrington,UK
Annette	Briley	Division of Women's Health, King's College London,London,UK
Jenny	Chambers	Division of Women's Health, King's College London,London,UK	Women’s Health Research Centre, Surgery and Cancer, Faculty of Medicine, Hammersmith Hospital, Imperial College Healthcare NHS Trust,London,UK
Floria	Cheng	Women’s Health Research Centre, Surgery and Cancer, Faculty of Medicine, Hammersmith Hospital, Imperial College Healthcare NHS Trust,London,UK
Peter H	Dixon	Division of Women's Health, King's College London,London,UK
Tony	Elston	Colchester Hospital University NHS Foundation Trust,Colchester,UK
Maria C	Estiu	Ramón Sardá Mother’s and Children’s Hospital,Buenos Aires,Argentina
Joanna C	Girling	West Middlesex University Hospital, Chelsea and Westminster Hospital NHS Foundation Trust,London,UK
William M	Hague	Robinson Research Institute, Discipline of Obstetrics and Gynaecology, The University of Adelaide, Women's and Children's Hospital,Adelaide,Australia
Sean	Hughes	Lancashire Teaching Hospital NHS Foundation Trust,Lancashire,UK
Mark	Johnson	Chelsea and Westminster Hospital NHS Foundation Trust,London,UK
Bryony	Jones	Queen Charlotte's and Chelsea Hospital, Imperial College Healthcare NHS Trust, Du Cane Road,London,UK
Mahantesh	Karoshi	Barnet General Hospital, Royal Free London NHS Foundation Trust,London,UK
Alison	Kirkpatrick	Frimley Park Hospital, NHS Frimley Health Foundation Trust,Camberley,UK
Ellen	Knox	Birmingham Women's Hospital, Birmingham Women's and Children's NHS Foundation Trust,Birmingham,UK
Malcolm	Macdougall	Newcastle upon Tyne Hospitals NHS Foundation Trust,Newcastle upon Tyne,UK
Lucy H	Mackillop	Nuffield Department of Women’s and Reproductive Health, Oxford University Hospitals NHS Trust,Oxford,UK	Oxford University Hospitals NHS Foundation Trust,Oxford,UK
Laura	Magee	St George's University Hospitals NHS Foundation Trust,London,UK
Hanns-Ulrich	Marschall	Department of Molecular and Clinical Medicine, Sahlgrenska Academy, University of Gothenburg,Gothenburg,Sweden
Muna	Noori	Queen Charlotte's and Chelsea Hospital, Imperial College Healthcare NHS Trust, Du Cane Road,London,UK
Hassan	Shehata	Epsom & St Helier University Hospitals NHS Trust,London,UK	Epsom General Hospital,Epsom,UK
Marta	Vazquez-Lopez	Women’s Health Research Centre, Surgery and Cancer, Faculty of Medicine, Hammersmith Hospital, Imperial College Healthcare NHS Trust,London,UK
David J	Williams	University College London Hospitals NHS Foundation Trust,London,UK
Catherine	Williamson	Division of Women's Health, King's College London,London,UK	Institute of Reproductive and Developmental Biology, Surgery and Cancer, Hammersmith Hospital, Imperial College Healthcare NHS Trust,London,UK
IRD - Inherited Retinal Disorders
Stephen	Abbs	East Anglian Medical Genetics Service, Cambridge University Hospitals NHS Foundation Trust,Cambridge,UK
Louise	Allen	Department of Medical Genetics, Cambridge Institute for Medical Research, University of Cambridge, Cambridge Biomedical Campus,Cambridge,UK	Department of Renal Medicine, Addenbrookes Hospital, Cambridge University Hospitals NHS Foundation Trust,Cambridge,UK	Department of Ophthalmology, Addenbrookes Hospital, Cambridge University Hospitals NHS Foundation Trust,Cambridge,UK
Gavin	Arno	Moorfields Eye Hospital NHS Foundation Trust,London,UK	UCL Institute of Ophthalmology, University College London,London,UK
Keren	Carss	Department of Haematology, University of Cambridge, Cambridge Biomedical Campus,Cambridge,UK	NIHR BioResource, Cambridge University Hospitals NHS Foundation, Cambridge Biomedical Campus,Cambridge,UK
Eleanor F	Dewhurst	Department of Haematology, University of Cambridge, Cambridge Biomedical Campus,Cambridge,UK	NIHR BioResource, Cambridge University Hospitals NHS Foundation, Cambridge Biomedical Campus,Cambridge,UK
Marie	Erwood	Department of Haematology, University of Cambridge, Cambridge Biomedical Campus,Cambridge,UK	NIHR BioResource, Cambridge University Hospitals NHS Foundation, Cambridge Biomedical Campus,Cambridge,UK
Courtney E	French	Department of Paediatrics, School of Clinical Medicine, University of Cambridge, Cambridge Biomedical Campus,Cambridge,UK
Robert H	Henderson	Great Ormond Street Hospital for Children NHS Foundation Trust,London,UK
Dragana	Josifova	Guy's and St Thomas' Hospital, Guy's and St Thomas' NHS Foundation Trust,London,UK
Michel	Michaelides	Moorfields Eye Hospital NHS Foundation Trust,London,UK
Anthony T	Moore	Moorfields Eye Hospital NHS Foundation Trust,London,UK	UCL Institute of Ophthalmology, University College London,London,UK	Ophthalmology Department, UCSF School of Medicine,San Francisco,USA
F Lucy	Raymond	Department of Medical Genetics, Cambridge Institute for Medical Research, University of Cambridge, Cambridge Biomedical Campus,Cambridge,UK	NIHR BioResource, Cambridge University Hospitals NHS Foundation, Cambridge Biomedical Campus,Cambridge,UK
Alba	Sanchis-Juan	Department of Haematology, University of Cambridge, Cambridge Biomedical Campus,Cambridge,UK	NIHR BioResource, Cambridge University Hospitals NHS Foundation, Cambridge Biomedical Campus,Cambridge,UK
Richard	Scott	Great Ormond Street Hospital for Children NHS Foundation Trust,London,UK
Andrew R	Webster	Moorfields Eye Hospital NHS Foundation Trust,London,UK	UCL Institute of Ophthalmology, University College London,London,UK
LHON - Leber Hereditary Optic Neuropathy
Patrick F	Chinnery	Department of Clinical Neurosciences, School of Clinical Medicine, University of Cambridge, Cambridge Biomedical Campus,Cambridge,UK	Medical Research Council Mitochondrial Biology Unit, Cambridge Biomedical Campus,Cambridge,UK	NIHR BioResource, Cambridge University Hospitals NHS Foundation, Cambridge Biomedical Campus,Cambridge,UK
Philip	Griffiths	Wellcome Centre for Mitochondrial Research, Institute of Genetic Medicine, Newcastle University,Newcastle upon Tyne,UK	Institute of Genetic Medicine, Newcastle University,Newcastle upon Tyne,UK
Rita	Horvath	Institute of Genetic Medicine, Newcastle University,Newcastle upon Tyne,UK	John Walton Muscular Dystrophy Research Centre, Institute of Genetic Medicine, Newcastle University,Newcastle upon Tyne,UK
Gavin	Hudson	Institute of Genetic Medicine, Newcastle University,Newcastle upon Tyne,UK
Neringa	Jurkute	Moorfields Eye Hospital NHS Foundation Trust,London,UK	University College London,London,UK
Angela	Pyle	Institute of Genetic Medicine, Newcastle University,Newcastle upon Tyne,UK
Wei	Wei	Department of Clinical Neurosciences, School of Clinical Medicine, University of Cambridge, Cambridge Biomedical Campus,Cambridge,UK	Medical Research Council Mitochondrial Biology Unit, Cambridge Biomedical Campus,Cambridge,UK
Patrick	Yu-Wai-Man	Department of Clinical Neurosciences, School of Clinical Medicine, University of Cambridge, Cambridge Biomedical Campus,Cambridge,UK	Medical Research Council Mitochondrial Biology Unit, Cambridge Biomedical Campus,Cambridge,UK	Moorfields Eye Hospital NHS Foundation Trust,London,UK	UCL Institute of Ophthalmology, University College London,London,UK
MPMT - Multiple Primary Malignant Tumours
Julian	Adlard	Yorkshire Regional Genetics Service, Chapel Allerton Hospital, Leeds Teaching Hospitals NHS Trust,Leeds,UK
Munaza	Ahmed	North East Thames Regional Genetics Service, Great Ormond Street Hospital for Children NHS Foundation Trust,London,UK
Ruth	Armstrong	Department of Medical Genetics, Cambridge Institute for Medical Research, University of Cambridge, Cambridge Biomedical Campus,Cambridge,UK	Cancer Research UK Cambridge Centre, Cambridge Biomedical Campus,Cambridge,UK	NIHR Cambridge Biomedical Research Centre, Cambridge Biomedical Campus,Cambridge,UK
Julian	Barwell	Department of Clinical Genetics, Leicester Royal Infirmary, University Hospitals of Leicester,Leicester,UK	University of Leicester,Leicester,UK
Carole	Brewer	Department of Clinical Genetics, Royal Devon & Exeter Hospital, Royal Devon and Exeter NHS Foundation Trust,Exeter,UK
Ruth	Casey	Department of Medical Genetics, Cambridge Institute for Medical Research, University of Cambridge, Cambridge Biomedical Campus,Cambridge,UK	Cancer Research UK Cambridge Centre, Cambridge Biomedical Campus,Cambridge,UK	NIHR Cambridge Biomedical Research Centre, Cambridge Biomedical Campus,Cambridge,UK
Trevor R P	Cole	West Midlands Regional Genetics Service, Birmingham Women's and Children's NHS Foundation Trust,Birmingham,UK
Dafydd Gareth	Evans	Manchester University NHS Foundation Trust,Manchester,UK
Lynn	Greenhalgh	Department of Clinical Genetics, Liverpool Women's NHS Foundation,Liverpool,UK
Helen L	Hanson	Department of Clinical Genetics, St George's University Hospitals NHS Foundation Trust,London,UK
Alex	Henderson	Northern Genetics Service, Newcastle upon Tyne Hospitals NHS Foundation Trust,Newcastle upon Tyne,UK
Jonathan	Hoffman	West Midlands Regional Genetics Service, Birmingham Women's and Children's NHS Foundation Trust,Birmingham,UK
Louise	Izatt	Department of Clinical Genetics, Guy's and St Thomas' NHS Foundation Trust,London,UK
Ajith	Kumar	North East Thames Regional Genetics Service, Great Ormond Street Hospital for Children NHS Foundation Trust,London,UK
Fiona	Lalloo	Manchester Centre for Genomic Medicine, St Mary's Hospital, Manchester Universities Foundation NHS Trust,Manchester,UK
Eamonn R	Maher	Department of Medical Genetics, Cambridge Institute for Medical Research, University of Cambridge, Cambridge Biomedical Campus,Cambridge,UK	NIHR Cambridge Biomedical Research Centre, Cambridge Biomedical Campus,Cambridge,UK
Kai Ren	Ong	West Midlands Regional Genetics Service, Birmingham Women's and Children's NHS Foundation Trust,Birmingham,UK
Soo-Mi	Park	East Anglian Medical Genetics Service, Cambridge University Hospitals NHS Foundation Trust,Cambridge,UK	Cancer Research UK Cambridge Centre, Cambridge Biomedical Campus,Cambridge,UK	NIHR Cambridge Biomedical Research Centre, Cambridge Biomedical Campus,Cambridge,UK
Joan	Paterson	Department of Medical Genetics, Cambridge Institute for Medical Research, University of Cambridge, Cambridge Biomedical Campus,Cambridge,UK	Cancer Research UK Cambridge Centre, Cambridge Biomedical Campus,Cambridge,UK	NIHR Cambridge Biomedical Research Centre, Cambridge Biomedical Campus,Cambridge,UK
Claire	Searle	Department of Clinical Genetics, Nottingham University Hospitals NHS Trust,Nottingham,UK
Lucy	Side	Wessex Clinical Genetics Service, University Hospital Southampton NHS Foundation Trust,Southampton,UK
Katie	Snape	Department of Clinical Genetics, St George's University Hospitals NHS Foundation Trust,London,UK
Marc	Tischkowitz	East Anglian Medical Genetics Service, Cambridge University Hospitals NHS Foundation Trust,Cambridge,UK	Department of Medical Genetics and NIHR Cambridge Biomedical Research Centre, University of Cambridge,Cambridge,UK
James	Whitworth	Department of Medical Genetics, Cambridge Institute for Medical Research, University of Cambridge, Cambridge Biomedical Campus,Cambridge,UK	Cancer Research UK Cambridge Centre, Cambridge Biomedical Campus,Cambridge,UK	NIHR Cambridge Biomedical Research Centre, Cambridge Biomedical Campus,Cambridge,UK
Emma	Woodward	Manchester Centre for Genomic Medicine, St Mary's Hospital, Manchester Universities Foundation NHS Trust,Manchester,UK
NDD - Neurological and Developmental Disorders
Stephen	Abbs	East Anglian Medical Genetics Service, Cambridge University Hospitals NHS Foundation Trust,Cambridge,UK
Gautam	Ambegaonkar	Child Development Centre, Addenbrookes Hospital, Cambridge University Hospitals NHS Foundation Trust,Cambridge,UK
Ruth	Armstrong	Department of Medical Genetics, Cambridge Institute for Medical Research, University of Cambridge, Cambridge Biomedical Campus,Cambridge,UK	Cancer Research UK Cambridge Centre, Cambridge Biomedical Campus,Cambridge,UK	NIHR Cambridge Biomedical Research Centre, Cambridge Biomedical Campus,Cambridge,UK
Maria A K	Bitner-Glindzicz	Great Ormond Street Hospital for Children NHS Foundation Trust,London,UK	University College London,London,UK	Genetics and Genomic Medicine Programme, UCL Great Ormond Street Institute of Child Health,London,UK
Angela	Brady	North West Thames Regional Genetic Service, London North West University Healthcare NHS Trust,Harrow,UK
Richard	Brown	Department of Neurology, Addenbrookes Hospital, Cambridge University Hospitals NHS Foundation Trust,Cambridge,UK
Jackie	Buck	NHS,NHS Trust,UK
Natalie	Canham	North West Thames Regional Genetic Service, London North West University Healthcare NHS Trust,Harrow,UK	Department of Clinical Genetics, Liverpool Women's NHS Foundation,Liverpool,UK
Jenny	Carmichael	Addenbrookes Hospital, Cambridge University Hospitals NHS Foundation Trust,Cambridge,UK
Keren	Carss	Department of Haematology, University of Cambridge, Cambridge Biomedical Campus,Cambridge,UK	NIHR BioResource, Cambridge University Hospitals NHS Foundation, Cambridge Biomedical Campus,Cambridge,UK
Manali	Chitre	Department of Paediatrics, School of Clinical Medicine, University of Cambridge, Cambridge Biomedical Campus,Cambridge,UK
Emma M	Clement	Great Ormond Street Hospital for Children NHS Foundation Trust,London,UK
Virginia	Clowes	North West Thames Regional Genetic Service, London North West University Healthcare NHS Trust,Harrow,UK
Patrick B	Deegan	Department of Medicine, School of Clinical Medicine, University of Cambridge, Cambridge Biomedical Campus,Cambridge,UK
Charu	Deshpande	Guy's and St Thomas' Hospital, Guy's and St Thomas' NHS Foundation Trust,London,UK
Eleanor F	Dewhurst	Department of Haematology, University of Cambridge, Cambridge Biomedical Campus,Cambridge,UK	NIHR BioResource, Cambridge University Hospitals NHS Foundation, Cambridge Biomedical Campus,Cambridge,UK
Rainer	Doffinger	Division of Clinical Biochemistry and Immunology, Cambridge University Hospitals NHS Foundation Trust,Cambridge,UK
Marie	Erwood	Department of Haematology, University of Cambridge, Cambridge Biomedical Campus,Cambridge,UK	NIHR BioResource, Cambridge University Hospitals NHS Foundation, Cambridge Biomedical Campus,Cambridge,UK
Helen	Firth	East Anglian Medical Genetics Service, Cambridge University Hospitals NHS Foundation Trust,Cambridge,UK	Wellcome Sanger Institute, Wellcome Genome Campus, Hinxton,Cambridge,UK
Frances A	Flinter	Guy's and St Thomas' Hospital, Guy's and St Thomas' NHS Foundation Trust,London,UK	Clinical Genetics Department, Guy's and St Thomas NHS Foundation Trust,London,UK
Courtney E	French	Department of Paediatrics, School of Clinical Medicine, University of Cambridge, Cambridge Biomedical Campus,Cambridge,UK
Alice	Gardham	North West Thames Regional Genetic Service, London North West University Healthcare NHS Trust,Harrow,UK
Neeti	Ghali	National Ehlers–Danlos Syndrome Diagnostic Service, Northwick Park Hospital,London,UK
Paul	Gissen	Great Ormond Street Hospital for Children NHS Foundation Trust,London,UK	University College London,London,UK
Kathleen M	Gorman	Department of Neurology, Great Ormond Street Hospital for Children NHS Foundation Trust,London,UK	Developmental Neurosciences, UCL Great Ormond Street Institute of Child Health,London,UK
Detelina	Grozeva	Department of Medical Genetics, Cambridge Institute for Medical Research, University of Cambridge, Cambridge Biomedical Campus,Cambridge,UK
Anke	Hensiek	Addenbrookes Hospital, Cambridge University Hospitals NHS Foundation Trust,Cambridge,UK
Simon	Holden	Department of Clinical Genetics, Addenbrookes Hospital, Cambridge University Hospitals NHS Foundation Trust,Cambridge,UK
Muriel	Holder	Guy's and St Thomas' Hospital, Guy's and St Thomas' NHS Foundation Trust,London,UK
Henry	Houlden	Department of Molecular Neuroscience, UCL Institute of Neurology,London,UK
Jane A	Hurst	Great Ormond Street Hospital for Children NHS Foundation Trust,London,UK
Dragana	Josifova	Guy's and St Thomas' Hospital, Guy's and St Thomas' NHS Foundation Trust,London,UK
Anne M	Kelly	Addenbrookes Hospital, Cambridge University Hospitals NHS Foundation Trust,Cambridge,UK
Deepa	Krishnakumar	Addenbrookes Hospital, Cambridge University Hospitals NHS Foundation Trust,Cambridge,UK
Manju A	Kurian	Developmental Neurosciences, UCL Great Ormond Street Institute of Child Health,London,UK	Department of Neurology, Great Ormond Street Hospital for Children NHS Foundation Trust,London,UK
Melissa	Lees	Great Ormond Street Hospital for Children NHS Foundation Trust,London,UK
Robert	MacLaren	Moorfields Eye Hospital NHS Foundation Trust,London,UK
Anna	Maw	Addenbrookes Hospital, Cambridge University Hospitals NHS Foundation Trust,Cambridge,UK
Amy	McTague	Department of Neurology, Great Ormond Street Hospital for Children NHS Foundation Trust,London,UK	Developmental Neurosciences, UCL Great Ormond Street Institute of Child Health,London,UK
Sarju	Mehta	Department of Clinical Genetics, Addenbrookes Hospital, Cambridge University Hospitals NHS Foundation Trust,Cambridge,UK
Elaine	Murphy	University College London Hospitals NHS Foundation Trust,London,UK
Joanne	Ng	Department of Neurology, Great Ormond Street Hospital for Children NHS Foundation Trust,London,UK	Developmental Neurosciences, UCL Great Ormond Street Institute of Child Health,London,UK
Adeline	Ngoh	Department of Neurology, Great Ormond Street Hospital for Children NHS Foundation Trust,London,UK	Developmental Neurosciences, UCL Great Ormond Street Institute of Child Health,London,UK
Apostolos	Papandreou	Department of Neurology, Great Ormond Street Hospital for Children NHS Foundation Trust,London,UK	Developmental Neurosciences, UCL Great Ormond Street Institute of Child Health,London,UK	UCL MRC Laboratory for Molecular Cell Biology,London,UK
Soo-Mi	Park	East Anglian Medical Genetics Service, Cambridge University Hospitals NHS Foundation Trust,Cambridge,UK	Cancer Research UK Cambridge Centre, Cambridge Biomedical Campus,Cambridge,UK	NIHR Cambridge Biomedical Research Centre, Cambridge Biomedical Campus,Cambridge,UK
Alasdair P J	Parker	Addenbrookes Hospital, Cambridge University Hospitals NHS Foundation Trust,Cambridge,UK
Chris	Patch	Guy's and St Thomas' Hospital, Guy's and St Thomas' NHS Foundation Trust,London,UK
Joan	Paterson	Department of Medical Genetics, Cambridge Institute for Medical Research, University of Cambridge, Cambridge Biomedical Campus,Cambridge,UK	Cancer Research UK Cambridge Centre, Cambridge Biomedical Campus,Cambridge,UK	NIHR Cambridge Biomedical Research Centre, Cambridge Biomedical Campus,Cambridge,UK
David	Perry	Department of Haematology, Cambridge University Hospitals NHS Foundation Trust,Cambridge,UK
Sanjay	Raina	The Princess Alexandra Hospital NHS Trust,Harlow,UK
F Lucy	Raymond	Department of Medical Genetics, Cambridge Institute for Medical Research, University of Cambridge, Cambridge Biomedical Campus,Cambridge,UK	NIHR BioResource, Cambridge University Hospitals NHS Foundation, Cambridge Biomedical Campus,Cambridge,UK
Evan	Reid	Department of Clinical Genetics, Addenbrookes Hospital, Cambridge University Hospitals NHS Foundation Trust,Cambridge,UK	Department of Medical Genetics, Cambridge Institute for Medical Research, University of Cambridge, Cambridge Biomedical Campus,Cambridge,UK
Elisabeth	Rosser	Great Ormond Street Hospital for Children NHS Foundation Trust,London,UK
Alba	Sanchis-Juan	Department of Haematology, University of Cambridge, Cambridge Biomedical Campus,Cambridge,UK	NIHR BioResource, Cambridge University Hospitals NHS Foundation, Cambridge Biomedical Campus,Cambridge,UK
Richard	Sandford	Department of Clinical Genetics, Addenbrookes Hospital, Cambridge University Hospitals NHS Foundation Trust,Cambridge,UK
Saikat	Santra	Birmingham Children's Hospital, Birmingham Women's and Children's NHS Foundation Trust,Birmingham,UK
Richard	Scott	Great Ormond Street Hospital for Children NHS Foundation Trust,London,UK
Aman	Sohal	Birmingham Children's Hospital, Birmingham Women's and Children's NHS Foundation Trust,Birmingham,UK
Penelope E	Stein	King's College Hospital NHS Foundation Trust,London,UK
Emily	Symington	Department of Haematology, Cambridge University Hospitals NHS Foundation Trust,Cambridge,UK
Ellen	Thomas	Guy's and St Thomas' Hospital, Guy's and St Thomas' NHS Foundation Trust,London,UK
Dorothy A	Thompson	Great Ormond Street Hospital for Children NHS Foundation Trust,London,UK
Marc	Tischkowitz	East Anglian Medical Genetics Service, Cambridge University Hospitals NHS Foundation Trust,Cambridge,UK	Department of Medical Genetics and NIHR Cambridge Biomedical Research Centre, University of Cambridge,Cambridge,UK
Julie	Vogt	West Midlands Regional Genetics Service, Birmingham Women's and Children's NHS Foundation Trust,Birmingham,UK
Emma L	Wakeling	North West Thames Regional Genetic Service, London North West University Healthcare NHS Trust,Harrow,UK
Evangeline	Wassmer	Birmingham Children's Hospital, Birmingham Women's and Children's NHS Foundation Trust,Birmingham,UK
NPD - Neuropathic Pain Disorders
David L	Bennett	The Nuffield Department of Clinical Neurosciences, University of Oxford, John Radcliffe Hospital,Oxford,UK
Sam	Chong	The National Hospital for Neurology and Neurosurgery, University College London Hospitals NHS Foundation Trust,London,UK
Ingrid	Emmerson	Newcastle upon Tyne Hospitals NHS Foundation Trust,Newcastle upon Tyne,UK
Lionel	Ginsberg	Royal Free London NHS Foundation Trust,London,UK	University College London Hospitals NHS Foundation Trust,London,UK	University College London,London,UK
David	Gosal	Salford Royal NHS Foundation Trust,Salford,UK
Robert D M	Hadden	Department of Neurology, King's College Hospital NHS Foundation Trust,London,UK
Rita	Horvath	Institute of Genetic Medicine, Newcastle University,Newcastle upon Tyne,UK	John Walton Muscular Dystrophy Research Centre, Institute of Genetic Medicine, Newcastle University,Newcastle upon Tyne,UK
Mohamed	Mahdi-Rogers	King's College Hospital NHS Foundation Trust,London,UK
Adnan	Manzur	Great Ormond Street Hospital for Children NHS Foundation Trust,London,UK
Andrew	Marshall	Faculty of Medical and Human Sciences, Centre for Endocrinology and Diabetes, Institute of Human Development, University of Manchester,Manchester,UK	Department of Clinical Neurophysiology, Manchester Royal Infirmary, Central Manchester University Hospitals National Health Service Foundation Trust, Manchester Academic Health Science Centre,Manchester,UK	National Institute for Health Research/Wellcome Trust Clinical Research Facility,Manchester,UK
Emma	Matthews	The National Hospital for Neurology and Neurosurgery, University College London Hospitals NHS Foundation Trust,London,UK	MRC Centre for Neuromuscular Diseases, Department of Molecular Neuroscience, UCL Institute of Neurology,London,UK
Mark I	McCarthy	Oxford Centre for Diabetes, Endocrinology and Metabolism, University of Oxford, Churchill Hospital,Oxford,UK	Wellcome Centre for Human Genetics, University of Oxford,Oxford,UK	NIHR Oxford Biomedical Research Centre, Oxford University Hospitals Trust,Oxford,UK
Mary M	Reilly	The National Hospital for Neurology and Neurosurgery, University College London Hospitals NHS Foundation Trust,London,UK	University College London,London,UK
Tara	Renton	King's College Hospital NHS Foundation Trust,London,UK
Andrew S C	Rice	Pain Research, Department of Surgery and Cancer, Faculty of Medicine, Imperial College London,London,UK	Pain Medicine, Chelsea and Westminster Hospital NHS Foundation Trust,London,UK
Andreas C	Themistocleous	The Nuffield Department of Clinical Neurosciences, University of Oxford, John Radcliffe Hospital,Oxford,UK
Tom	Vale	The Nuffield Department of Clinical Neurosciences, University of Oxford, John Radcliffe Hospital,Oxford,UK
Natalie	van Zuydam	The Nuffield Department of Clinical Neurosciences, University of Oxford, John Radcliffe Hospital,Oxford,UK
Suellen M	Walker	Great Ormond Street Hospital for Children NHS Foundation Trust,London,UK	UCL Great Ormond Street Institute of Child Health,London,UK
Christopher Geoffrey	Woods	Department of Medical Genetics, Cambridge Institute for Medical Research, University of Cambridge, Cambridge Biomedical Campus,Cambridge,UK	Addenbrookes Hospital, Cambridge University Hospitals NHS Foundation Trust,Cambridge,UK
PAH - Pulmonary Arterial Hypertension
Marta	Bleda	Department of Medicine, School of Clinical Medicine, University of Cambridge, Cambridge Biomedical Campus,Cambridge,UK
Harm	Bogaard	Department of Pulmonary Medicine, VU University Medical Centre,Amsterdam,The Netherlands
Colin	Church	Golden Jubilee National Hospital,Glasgow,UK
Gerry	Coghlan	Royal Free London NHS Foundation Trust,London,UK
Robin	Condliffe	Sheffield Pulmonary Vascular Disease Unit, Royal Hallamshire Hospital NHS Foundation Trust,Sheffield,UK
Victoria	Cookson	Great Ormond Street Hospital for Children NHS Foundation Trust,London,UK
Paul	Corris	National Pulmonary Hypertension Service (Newcastle), The Newcastle upon Tyne Hospitals NHS Foundation Trust,Newcastle upon Tyne,UK	Institute of Cellular Medicine, Faculty of Medical Sciences, Newcastle University,Newcastle upon Tyne,UK
Amanda	Creaser-Myers	Royal Hallamshire Hospital NHS Foundation Trust,Sheffield,UK
Rosa	Da Costa	Royal Brompton Hospital, Royal Brompton and Harefield NHS Foundation Trust,London,UK
Cesare	Danesino	Department of Molecular Medicine, General Biology, and Medical Genetics Unit, University of Pavia,Pavia,Italy
Natalie	Dormand	Royal Brompton Hospital, Royal Brompton and Harefield NHS Foundation Trust,London,UK
Mélanie	Eyries	Departement de Genetique & ICAN, Hopital Pitie-Salpetriere, Assistance Publique Hopitaux de Paris,Paris,France
Henning	Gall	University of Giessen and Marburg Lung Center (UGMLC),Giessen,Germany
Stefano	Ghio	Division of Cardiology, Fondazione IRCCS Policlinico S. Matteo,Pavia,Italy
Hossein-Ardeschir	Ghofrani	University of Giessen and Marburg Lung Center (UGMLC),Giessen,Germany	Department of Medicine, Imperial College London,London,UK
J Simon R	Gibbs	National Heart and Lung Institute, Imperial College London,London,UK
Barbara	Girerd	Univ. Paris-Sud, Faculty of Medicine, University Paris-Saclay,Le Kremlin Bicetre,France	Service de Pneumologie, Centre de Reference de l'Hypertension Pulmonaire, Hopital Bicetre (Assistance Publique Hopitaux de Paris),Le Kremlin Bicetre,France	INSERM U999, Hospital Marie Lannelongue,Le Plessis Robinson,France
Stefan	Gräf	Department of Medicine, School of Clinical Medicine, University of Cambridge, Cambridge Biomedical Campus,Cambridge,UK	Department of Haematology, University of Cambridge, Cambridge Biomedical Campus,Cambridge,UK	NIHR BioResource, Cambridge University Hospitals NHS Foundation, Cambridge Biomedical Campus,Cambridge,UK
Alan	Greenhalgh	Freeman Hospital, The Newcastle upon Tyne Hospitals NHS Foundation Trust,Newcastle upon Tyne,UK
Charaka	Hadinnapola	Department of Medicine, School of Clinical Medicine, University of Cambridge, Cambridge Biomedical Campus,Cambridge,UK
Matthias	Haimel	Department of Medicine, School of Clinical Medicine, University of Cambridge, Cambridge Biomedical Campus,Cambridge,UK	Department of Haematology, University of Cambridge, Cambridge Biomedical Campus,Cambridge,UK	NIHR BioResource, Cambridge University Hospitals NHS Foundation, Cambridge Biomedical Campus,Cambridge,UK
Simon	Holden	Department of Clinical Genetics, Addenbrookes Hospital, Cambridge University Hospitals NHS Foundation Trust,Cambridge,UK
Arjan	Houweling	Department of Pulmonary Medicine, VU University Medical Centre,Amsterdam,The Netherlands
Luke S	Howard	National Heart and Lung Institute, Imperial College London,London,UK	National Pulmonary Hypertension Service, Imperial College Healthcare NHS Trust,London,UK
Anna E	Huis in 't Veld	Department of Pulmonary Medicine, VU University Medical Centre,Amsterdam,The Netherlands
Marc	Humbert	Univ. Paris-Sud, Faculty of Medicine, University Paris-Saclay,Le Kremlin Bicetre,France	Service de Pneumologie, Centre de Reference de l'Hypertension Pulmonaire, Hopital Bicetre (Assistance Publique Hopitaux de Paris),Le Kremlin Bicetre,France	INSERM U999, Hospital Marie Lannelongue,Le Plessis Robinson,France
Val	Irvine	Golden Jubilee National Hospital,Glasgow,UK
Fiona	Kennedy	Golden Jubilee National Hospital,Glasgow,UK
David G	Kiely	Sheffield Pulmonary Vascular Disease Unit, Royal Hallamshire Hospital NHS Foundation Trust,Sheffield,UK
Gabor	Kovacs	Ludwig Boltzmann Institute for Lung Vascular Research,Graz,Austria	Dept of Internal Medicine, Division of Pulmonology, Medical University of Graz,Graz,Austria
Allan	Lawrie	Department of Infection, Immunity & Cardiovascular Disease, University of Sheffield,Sheffield,UK
Rajiv D	Machado	School of Life Sciences, University of Lincoln,Lincoln,UK	Molecular and Clinical Sciences Research Institute, St George's University of London,London,UK
Robert V	MacKenzie Ross	Royal United Hospitals Bath NHS Foundation Trust,Bath,UK
Jennifer	Martin	Department of Medicine, School of Clinical Medicine, University of Cambridge, Cambridge Biomedical Campus,Cambridge,UK	Department of Public Health and Primary Care, University of Cambridge,Cambridge,UK	NIHR BioResource, Cambridge University Hospitals NHS Foundation, Cambridge Biomedical Campus,Cambridge,UK
Larahmie	Masati	Department of Medicine, Imperial College London,London,UK
Sharon	Meehan	Department of Medicine, Imperial College London,London,UK
Shahin	Moledina	Great Ormond Street Hospital for Children NHS Foundation Trust,London,UK
David	Montani	Univ. Paris-Sud, Faculty of Medicine, University Paris-Saclay,Le Kremlin Bicetre,France	Service de Pneumologie, Centre de Reference de l'Hypertension Pulmonaire, Hopital Bicetre (Assistance Publique Hopitaux de Paris),Le Kremlin Bicetre,France	INSERM U999, Hospital Marie Lannelongue,Le Plessis Robinson,France
Nicholas	Morrell	Department of Medicine, School of Clinical Medicine, University of Cambridge, Cambridge Biomedical Campus,Cambridge,UK	NIHR BioResource, Cambridge University Hospitals NHS Foundation, Cambridge Biomedical Campus,Cambridge,UK
Michael	Newnham	Department of Medicine, School of Clinical Medicine, University of Cambridge, Cambridge Biomedical Campus,Cambridge,UK	Royal Papworth Hospital NHS Foundation Trust,Cambridge,UK
Andrea	Olschewski	Ludwig Boltzmann Institute for Lung Vascular Research,Graz,Austria
Horst	Olschewski	Ludwig Boltzmann Institute for Lung Vascular Research,Graz,Austria	Dept of Internal Medicine, Division of Pulmonology, Medical University of Graz,Graz,Austria
Shokri	Othman	Department of Medicine, Imperial College London,London,UK
Andrew	Peacock	Golden Jubilee National Hospital,Glasgow,UK
Joanna	Pepke-Zaba	Royal Papworth Hospital NHS Foundation Trust,Cambridge,UK
Gary J	Polwarth	Royal Papworth Hospital NHS Foundation Trust,Cambridge,UK
Lavanya	Ranganathan	Department of Medicine, Imperial College London,London,UK
Laura	Scelsi	Division of Cardiology, Fondazione IRCCS Policlinico S. Matteo,Pavia,Italy
Gwen	Schotte	Department of Pulmonary Medicine, VU University Medical Centre,Amsterdam,The Netherlands
Werner	Seeger	University of Giessen and Marburg Lung Center (UGMLC),Giessen,Germany
Deborah	Shipley	Freeman Hospital, The Newcastle upon Tyne Hospitals NHS Foundation Trust,Newcastle upon Tyne,UK
Florent	Soubrier	Departement de Genetique & ICAN, Hopital Pitie-Salpetriere, Assistance Publique Hopitaux de Paris,Paris,France
Laura	Southgate	Molecular and Clinical Sciences Research Institute, St George's University of London,London,UK	Faculty of Life Sciences and Medicine, King’s College London,London,UK
Jay	Suntharalingam	Royal United Hospitals Bath NHS Foundation Trust,Bath,UK
Emilia	Swietlik	Department of Medicine, School of Clinical Medicine, University of Cambridge, Cambridge Biomedical Campus,Cambridge,UK
Mark	Toshner	Department of Medicine, School of Clinical Medicine, University of Cambridge, Cambridge Biomedical Campus,Cambridge,UK	Royal Papworth Hospital NHS Foundation Trust,Cambridge,UK
Carmen	Treacy	Department of Medicine, School of Clinical Medicine, University of Cambridge, Cambridge Biomedical Campus,Cambridge,UK	Royal Papworth Hospital NHS Foundation Trust,Cambridge,UK
Richard	Trembath	King's College London,London,UK
Anton	Vonk Noordegraaf	Department of Pulmonary Medicine, VU University Medical Centre,Amsterdam,The Netherlands
Quinten	Waisfisz	Department of Clinical Genetics, VU University Medical Centre,Amsterdam,The Netherlands
Ivy	Wanjiku	Department of Medicine, Imperial College London,London,UK
John	Wharton	Department of Medicine, Imperial College London,London,UK
Martin R	Wilkins	Department of Medicine, Imperial College London,London,UK
Stephen J	Wort	Royal Brompton Hospital, Royal Brompton and Harefield NHS Foundation Trust,London,UK	Imperial College London,London,UK
Katherine	Yates	Department of Medicine, School of Clinical Medicine, University of Cambridge, Cambridge Biomedical Campus,Cambridge,UK	Department of Haematology, University of Cambridge, Cambridge Biomedical Campus,Cambridge,UK	NIHR BioResource, Cambridge University Hospitals NHS Foundation, Cambridge Biomedical Campus,Cambridge,UK
PID - Primary Immune Disorders
Zoe	Adhya	Barts Health NHS Foundation Trust,London,UK
Hana	Alachkar	Salford Royal NHS Foundation Trust,Salford,UK
Ariharan	Anantharachagan	Addenbrookes Hospital, Cambridge University Hospitals NHS Foundation Trust,Cambridge,UK	Lancashire Teaching Hospital NHS Foundation Trust,Lancashire,UK
Richard	Antrobus	University Hospitals Birmingham NHS Foundation Trust,Birmingham,UK
Gururaj	Arumugakani	The Leeds Teaching Hospitals NHS Trust,Leeds,UK
Chiara	Bacchelli	UCL Great Ormond Street Institute of Child Health,London,UK
Helen E	Baxendale	Department of Medicine, School of Clinical Medicine, University of Cambridge, Cambridge Biomedical Campus,Cambridge,UK	Department of Paediatrics, School of Clinical Medicine, University of Cambridge, Cambridge Biomedical Campus,Cambridge,UK	Division of Clinical Biochemistry and Immunology, Cambridge University Hospitals NHS Foundation Trust,Cambridge,UK	Royal Papworth Hospital NHS Foundation Trust,Cambridge,UK
Claire	Bethune	University Hospitals Plymouth NHS Trust,Plymouth,UK
Shahnaz	Bibi	Great Ormond Street Hospital for Children NHS Foundation Trust,London,UK
Claire	Booth	Great Ormond Street Hospital for Children NHS Foundation Trust,London,UK
Michael J	Browning	Department of Immunology, Leicester Royal Infirmary,Leicester,UK
Matthew S	Buckland	Royal Free London NHS Foundation Trust,London,UK
Siobhan O	Burns	Institute of Immunity and Transplantation, University College London,London,UK	Department of Immunology, Royal Free London NHS Foundation Trust,London,UK
Oliver S	Burren	Department of Medicine, School of Clinical Medicine, University of Cambridge, Cambridge Biomedical Campus,Cambridge,UK
Anita	Chandra	Addenbrookes Hospital, Cambridge University Hospitals NHS Foundation Trust,Cambridge,UK
Nichola	Cooper	Department of Medicine, Imperial College London,London,UK
Sophie	Davies	Addenbrookes Hospital, Cambridge University Hospitals NHS Foundation Trust,Cambridge,UK
Sarah	Deacock	Royal Surrey County Hospital NHS Foundation Trust,Guildford,UK
John	Dempster	Barts Health NHS Foundation Trust,London,UK
Lisa A	Devlin	Regional Immunology Service, The Royal Hospitals,Belfast,UK
Rainer	Doffinger	Division of Clinical Biochemistry and Immunology, Cambridge University Hospitals NHS Foundation Trust,Cambridge,UK
Elizabeth	Drewe	Nottingham University Hospitals NHS Trust,Nottingham,UK
J David M	Edgar	Regional Immunology Service, The Royal Hospitals,Belfast,UK	Queen's University Belfast,Belfast,UK
William	Egner	Sheffield Teaching Hospitals NHS Foundation Trust,Sheffield,UK
Tariq	El-Shanawany	Immunodeficiency Centre for Wales, University Hospital of Wales,Cardiff,IUK
Henry	Farmery	MRC Biostatistics Unit, Cambridge Institute of Public Health, University of Cambridge,Cambridge,UK
H Bobby	Gaspar	UCL Great Ormond Street Institute of Child Health,London,UK
Rohit	Ghurye	Barts Health NHS Foundation Trust,London,UK
Kimberly C	Gilmour	UCL Great Ormond Street Institute of Child Health,London,UK	Great Ormond Street Hospital for Children NHS Foundation Trust,London,UK
Sarah	Goddard	University Hospitals of North Midlands NHS Trust,Stoke-on-Trent,UK
Pavels	Gordins	East Yorkshire Regional Adult Immunology and Allergy Unit, Hull Royal Infirmary, Hull and East Yorkshire Hospitals NHS Trust,Hull,UK
Sofia	Grigoriadou	Barts Health NHS Foundation Trust,London,UK
Scott	Hackett	Birmingham Heartlands Hospital, University Hospitals Birmingham NHS Foundation Trust,Birmingham,UK
Rosie	Hague	Royal Hospital for Children, NHS Greater Glasgow and Clyde,Glasgow,UK
Lorraine	Harper	University Hospitals Birmingham NHS Foundation Trust,Birmingham,UK
Grant	Hayman	Epsom & St Helier University Hospitals NHS Trust,London,UK
Archana	Herwadkar	Salford Royal NHS Foundation Trust,Salford,UK
Stephen	Hughes	Royal Manchester Children's Hospital, Manchester University NHS Foundation Trust,Manchester,UK
Aarnoud P	Huissoon	Birmingham Heartlands Hospital, University Hospitals Birmingham NHS Foundation Trust,Birmingham,UK
Stephen	Jolles	Immunodeficiency Centre for Wales, University Hospital of Wales,Cardiff,IUK
Yousuf	Karim	Royal Surrey County Hospital NHS Foundation Trust,Guildford,UK	Frimley Park Hospital, NHS Frimley Health Foundation Trust,Camberley,UK
Peter	Kelleher	Centre for Immunology & Vaccinology , Chelsea & Westminster Hospital , Department of Medicine, Imperial College London,London,UK	Department of Respiratory Medicine Royal Brompton & Harefield NHS Foundation Trust,London,UK
Sorena	Kiani	Barts Health NHS Foundation Trust,London,UK
Nigel	Klein	Great Ormond Street Hospital for Children NHS Foundation Trust,London,UK
Taco W	Kuijpers	Department of Pediatric Hematology, Immunology, Rheumatology and Infectious Diseases, Emma Children’s Hospital, Academic Medical Center (AMC), University of Amsterdam,Amsterdam,The Netherlands	Department of Blood Cell Research, Sanquin,Amsterdam,The Netherlands
Dinakantha	Kumararatne	Department of Clinical Immunology, Addenbrookes Hospital, Cambridge University Hospitals NHS Foundation Trust,Cambridge,UK
James	Laffan	Barts Health NHS Foundation Trust,London,UK
Hana	Lango Allen	Department of Haematology, University of Cambridge, Cambridge Biomedical Campus,Cambridge,UK	NIHR BioResource, Cambridge University Hospitals NHS Foundation, Cambridge Biomedical Campus,Cambridge,UK
Sara E	Lear	Norfolk and Norwich University Hospitals NHS Foundation Trust,Norwich,UK	Addenbrookes Hospital, Cambridge University Hospitals NHS Foundation Trust,Cambridge,UK	Addenbrooke's Treatment Centre, Addenbrooke's Hospital, Cambridge University Hospitals NHS Foundation Trust,Cambridge,UK
Hilary	Longhurst	Barts Health NHS Foundation Trust,London,UK
Lorena E	Lorenzo	Barts Health NHS Foundation Trust,London,UK
Paul A	Lyons	Department of Medicine, School of Clinical Medicine, University of Cambridge, Cambridge Biomedical Campus,Cambridge,UK
Jesmeen	Maimaris	UCL Great Ormond Street Institute of Child Health,London,UK
Ania	Manson	Addenbrookes Hospital, Cambridge University Hospitals NHS Foundation Trust,Cambridge,UK
Elizabeth M	McDermott	Nottingham University Hospitals NHS Trust,Nottingham,UK
Anoop	Mistry	The Leeds Teaching Hospitals NHS Trust,Leeds,UK
Valerie	Morrisson	Addenbrookes Hospital, Cambridge University Hospitals NHS Foundation Trust,Cambridge,UK
Sai H K	Murng	Gartnavel General Hospital, NHS Greater Glasgow and Clyde,Glasgow,UK	Queen Elizabeth University Hospital,Glasgow,UK
Sadia	Noorani	Sandwell and West Birmingham Hospitals NHS Trust,Birmingham,UK
Eric	Oksenhendler	Department of Clinical Immunology, Hopital Saint-Louis, Assistance Publique-Hopitaux de Paris, University Paris Diderot, Sorbonne Paris Cite,Paris,France
Mark J	Ponsford	Cardiff University,Cardiff,UK	Immunodeficiency Centre for Wales, Heath Hospital,Cardiff,UK
Waseem	Qasim	Great Ormond Street Hospital for Children NHS Foundation Trust,London,UK	UCL Great Ormond Street Institute of Child Health,London,UK
Ellen	Quinn	Great Ormond Street Hospital for Children NHS Foundation Trust,London,UK
Isabella	Quinti	Department of Molecular Medicine, Sapienza University of Rome,Rome,Italy
Alex	Richter	University Hospitals Birmingham NHS Foundation Trust,Birmingham,UK
Crina	Samarghitean	Department of Haematology, University of Cambridge, Cambridge Biomedical Campus,Cambridge,UK	NIHR BioResource, Cambridge University Hospitals NHS Foundation, Cambridge Biomedical Campus,Cambridge,UK
Ravishankar B	Sargur	Sheffield Teaching Hospitals NHS Foundation Trust,Sheffield,UK
Sinisa	Savic	The Department of Clinical Immunology and Allergy and The NIHR Leeds Biomedical Research Centre,Leeds,UK	Leeds Institute of Rheumatic and Musculoskeletal Medicine, St James’s University Hospital,Leeds,UK
Suranjith L	Seneviratne	Royal Free London NHS Foundation Trust,London,UK	Institute of Immunity and Transplantation, University College London,London,UK
W A Carrock	Sewell	Scunthorpe General Hospital, Northern Lincolnshire and Goole NHS Foundation Trust,Scunthorpe,UK
Fiona	Shackley	Sheffield Teaching Hospitals NHS Foundation Trust,Sheffield,UK
Ilenia	Simeoni	Department of Haematology, University of Cambridge, Cambridge Biomedical Campus,Cambridge,UK	NIHR BioResource, Cambridge University Hospitals NHS Foundation, Cambridge Biomedical Campus,Cambridge,UK
Kenneth G C	Smith	Department of Medicine, School of Clinical Medicine, University of Cambridge, Cambridge Biomedical Campus,Cambridge,UK
Emily	Staples	Department of Medicine, School of Clinical Medicine, University of Cambridge, Cambridge Biomedical Campus,Cambridge,UK
Hans	Stauss	Royal Free London NHS Foundation Trust,London,UK
Cathal L	Steele	Ninewells Hospital and Medical School, NHS Tayside,Dundee,UK
James E	Thaventhiran	MRC Toxicology Unit, School of Biological Sciences, University of Cambridge,Cambridge,UK
David	Thomas	Department of Medicine, School of Clinical Medicine, University of Cambridge, Cambridge Biomedical Campus,Cambridge,UK
Moira J	Thomas	Gartnavel General Hospital, NHS Greater Glasgow and Clyde,Glasgow,UK	Queen Elizabeth University Hospital,Glasgow,UK
Adrian J	Thrasher	UCL Great Ormond Street Institute of Child Health,London,UK
Rafal	Urniaz	Department of Medicine, School of Clinical Medicine, University of Cambridge, Cambridge Biomedical Campus,Cambridge,UK
Steven B	Welch	Birmingham Chest Clinic and Heartlands Hospital, University Hospitals Birmingham NHS Foundation Trust,Birmingham,UK
Lisa	Willcocks	Addenbrookes Hospital, Cambridge University Hospitals NHS Foundation Trust,Cambridge,UK
Sarita	Workman	Royal Free London NHS Foundation Trust,London,UK
Austen	Worth	Great Ormond Street Hospital for Children NHS Foundation Trust,London,UK
Nigel	Yeatman	Barts Health NHS Foundation Trust,London,UK
Patrick F K	Yong	Frimley Park Hospital, NHS Frimley Health Foundation Trust,Camberley,UK
PMG - Primary Membranoproliferative Glomerulonephritis
Saeed	Ahmed	Department of Renal Medicine, Sunderland Royal Hospital,Sunderland,UK
Waqar	Ayub	University Hospitals Coventry and Warwickshire,Coventry,UK
Jonathan	Barratt	Infection, Immunity and Inflammation, University of Leicester,Leicester,UK
Preetham	Boddana	Gloucestershire Royal Hospital, Gloucestershire Hospitals NHS Foundation Trust,Gloucester,UK
Gary	Campbell	Norfolk and Norwich University Hospitals NHS Foundation Trust,Norwich,UK
Melanie M Y	Chan	UCL Centre for Nephrology, University College London,London,UK
Martin T	Christian	Children's Renal and Urology Unit, Nottingham Children's Hospital, QMC, Nottingham University Hospitals NHS Trust,Nottingham,UK
H Terence	Cook	Imperial College Renal and Transplant Centre, Hammersmith Hospital, Imperial College Healthcare NHS Trust,London,UK
Daniel P	Gale	UCL Centre for Nephrology, University College London,London,UK
Rodney D	Gilbert	Southampton Children’s Hospital, University Hospital Southampton NHS Foundation Trust,Southampton,UK	Faculty of Medicine, University of Southampton,Southampton,UK
Sian	Griffiths	University Hospital of Wales,Cardiff,UK
Matthew	Hall	Nottingham University Hospitals NHS Trust,Nottingham,UK
Claire	Harris	Institute of Cellular Medicine, Faculty of Medical Sciences, Newcastle University,Newcastle upon Tyne,UK
Shivaram	Hegde	University Hospital of Wales,Cardiff,UK
Praveen	Jeevaratnam	Lister Hospital, East and North Hertfordshire NHS Trust,Stevenage,UK
Sally A	Johnson	Department of Paediatric Nephrology, Great North Children’s Hospital, Newcastle upon Tyne Hospitals NHS Foundation Trust,Newcastle upon Tyne,UK	Institute of Cellular Medicine, Faculty of Medical Sciences, Newcastle University,Newcastle upon Tyne,UK
Caroline	Jones	Alder Hey Children's Hospital,Liverpool,UK
Sarah H A	Lawman	Sussex Kidney Unit, Royal Sussex County Hospital, Brighton and Sussex University Hospitals,Brighton,UK
Adam P	Levine	UCL Centre for Nephrology, University College London,London,UK
Andrew	Lewington	Renal Medicine, Leeds Teaching Hospitals NHS Trust,Leeds,UK
Kevin J	Marchbank	Institute of Cellular Medicine, Faculty of Medical Sciences, Newcastle University,Newcastle upon Tyne,UK	The National Renal Complement Therapeutics Centre, Royal Victoria Infirmary,Newcastle upon Tyne,UK
Patrick B	Mark	Institute of Cardiovascular and Medical Sciences, University of Glasgow,Glasgow,UK	Queen Elizabeth University Hospital,Glasgow,UK
Stephen	Marks	Great Ormond Street Hospital for Children NHS Foundation Trust,London,UK
Heather	Maxwell	Royal Hospital for Children, NHS Greater Glasgow and Clyde,Glasgow,UK
Paul	McAlinden	Institute of Cellular Medicine, Faculty of Medical Sciences, Newcastle University,Newcastle upon Tyne,UK
David	Milford	Birmingham Children's Hospital, Birmingham Women's and Children's NHS Foundation Trust,Birmingham,UK
Jason	Moore	Royal Devon and Exeter NHS Foundation Trust,Exeter,UK
Monika	Mozere	UCL Centre for Nephrology, University College London,London,UK
Albert C M	Ong	Department of Infection, Immunity & Cardiovascular Disease, University of Sheffield,Sheffield,UK	Sheffield Teaching Hospitals NHS Foundation Trust,Sheffield,UK
Omid	Sadeghi-Alavijeh	UCL Centre for Nephrology, University College London,London,UK
Manish D	Sinha	Department of Paediatric Nephrology, Evelina London Children's Hospital, Guy's & St Thomas' NHS Foundation Trust,London,UK	Guy's and St Thomas' Hospital, Guy's and St Thomas' NHS Foundation Trust,London,UK	King's College London,London,UK
Nick	Webb	Royal Manchester Children's Hospital, Manchester University NHS Foundation Trust,Manchester,UK
Julie	Wessels	University Hospitals of North Midlands NHS Trust,Stoke-on-Trent,UK
Edwin K S	Wong	Institute of Cellular Medicine, Faculty of Medical Sciences, Newcastle University,Newcastle upon Tyne,UK	Newcastle upon Tyne Hospitals NHS Foundation Trust,Newcastle upon Tyne,UK
MPGN/C3 Glomerulopathy Rare Renal Disease group		MPGN/C3 Glomerulopathy Rare Renal Disease group,,UK
SMD - Stem cell and Myeloid Disorders
Philip	Ancliff	Great Ormond Street Hospital for Children NHS Foundation Trust,London,UK
Yesim	Aydinok	Ege University Hospital, Department of Paediatric Hematology-Oncology,Izmir,Turkey
Christian	Babbs	MRC Molecular Haematology Unit, MRC Weatherall Institute of Molecular Medicine, University of Oxford,Oxford,UK	NIHR Oxford Biomedical Research Centre, Oxford University Hospitals Trust,Oxford,UK
Elizabeth	Chalmers	Royal Hospital for Children, NHS Greater Glasgow and Clyde,Glasgow,UK
Claire	Harrison	Guy's and St Thomas' Hospital, Guy's and St Thomas' NHS Foundation Trust,London,UK
Sally	Kinsey	Leeds General Infirmary, Leeds Teaching Hospitals NHS Trust,Leeds,UK
D Mark	Layton	Department of Haematology, Hammersmith Hospital, Imperial College Healthcare NHS Trust,London,UK	Centre for Haematology, Imperial College London,London,UK
Eleni	Louka	MRC Molecular Haematology Unit, MRC Weatherall Institute of Molecular Medicine, University of Oxford,Oxford,UK	NIHR Oxford Biomedical Research Centre, Oxford University Hospitals Trust,Oxford,UK
Simon J	McGowan	MRC Molecular Haematology Unit, MRC Weatherall Institute of Molecular Medicine, University of Oxford,Oxford,UK	NIHR Oxford Biomedical Research Centre, Oxford University Hospitals Trust,Oxford,UK
Adam J	Mead	MRC Molecular Haematology Unit, MRC Weatherall Institute of Molecular Medicine, University of Oxford,Oxford,UK
Steven	Okoli	MRC Molecular Haematology Unit, MRC Weatherall Institute of Molecular Medicine, University of Oxford,Oxford,UK	NIHR Oxford Biomedical Research Centre, Oxford University Hospitals Trust,Oxford,UK
Jennifer	O'Sullivan	Department of Haematology, Guy's and St Thomas' NHS Foundation Trust,London,UK
Beth	Psaila	Centre for Haematology, Department of Medicine, Hammersmith Hospital, Imperial College Healthcare NHS Trust,London,UK	MRC Molecular Haematology Unit, MRC Weatherall Institute of Molecular Medicine, University of Oxford,Oxford,UK	NIHR Oxford Biomedical Research Centre, Oxford University Hospitals Trust,Oxford,UK
Anupama	Rao	Great Ormond Street Hospital for Children NHS Foundation Trust,London,UK
Irene	Roberts	MRC Molecular Haematology Unit, MRC Weatherall Institute of Molecular Medicine, University of Oxford,Oxford,UK	Department of Paediatrics, Weatherall Institute of Molecular Medicine, University of Oxford,Oxford,UK	NIHR Oxford Biomedical Research Centre, Oxford University Hospitals Trust,Oxford,UK
Noemi B	Roy	MRC Molecular Haematology Unit, MRC Weatherall Institute of Molecular Medicine, University of Oxford,Oxford,UK	Department of Paediatrics, Weatherall Institute of Molecular Medicine, University of Oxford,Oxford,UK	NIHR Oxford Biomedical Research Centre, Oxford University Hospitals Trust,Oxford,UK
Ajay	Vora	Sheffield Children's Hospital NHS Foundation Trust,Sheffield,UK
SRNS - Steroid Resistant Nephrotic Syndrome
Maryam	Afzal	Bristol Renal and Children's Renal Unit, Bristol Medical School, University of Bristol,Bristol,UK
Agnieszka	Bierzynska	Bristol Renal and Children's Renal Unit, Bristol Medical School, University of Bristol,Bristol,UK
Carmen	Bugarin Diz	King's College London,London,UK
Elizabeth	Colby	Bristol Renal and Children's Renal Unit, Bristol Medical School, University of Bristol,Bristol,UK
Melanie N	Ekani	Guy's and St Thomas' Hospital, Guy's and St Thomas' NHS Foundation Trust,London,UK
Ania	Koziell	King's College London,London,UK	Department of Paediatric Nephrology, Evelina London Children's Hospital, Guy's & St Thomas' NHS Foundation Trust,London,UK
Moin	Saleem	Bristol Renal and Children's Renal Unit, Bristol Medical School, University of Bristol,Bristol,UK	Bristol Royal Hospital for Children, University Hospitals Bristol NHS Foundation Trust,Bristol,UK
Simon	Satchell	North Bristol NHS Trust,Bristol,UK	Bristol Renal and Children's Renal Unit, Bristol Medical School, University of Bristol,Bristol,UK
