# Supplementary material for: Metabolome Genome-Wide Association Study Identifies 74 Novel Genomic Regions Influencing Plasma Metabolites Levels
Source: Metabolites. 2022 Jan 11;12(1):61. doi: 10.3390/metabo12010061 (PMC8777659; doi:10.3390/metabo12010061)
Supplement: Supplementary file 1 [file metabolites-12-00061-s001.zip › Supplementary Tables_submit.xlsx]

## Sheet: Supplementary Tables
Supplementary Table S1	Genomic inflation factors for genome-wide association studies of all metabolites
Supplementary Table S2	SNP Chip LDscore-based heritability estimates for all the available metabolites
Supplementary Table S3	Genomic regions and markers most significantly associated with metabolite levels
Supplementary Table S4	Additional SNPs identified associated with metabolite levels following Co-Jo condtional analyses
Supplementary Table S5	Summary of the most significnat eQTL effects for a selection of variants most significantly associated with metabolite levels
Supplementary Table S6	Selection of the most significant Ldscore-based genomic correlations between analyzed metabolites and other GWAS traits
Supplementary Table S7	Concordance of results and repication between the GWAS in the NIHR Bioresource discovery cohort and the KORA cohort
Supplementary Table S8	Novel genomic regions associated with metabolite levels, identified as a result of a meta-analysis between the NIHR Bioresource and the KORA cohorts
Supplementary Table S9	Genome-wide significant (p<5e-08) results for SNP x Sex interactions

## Sheet: Supplementary Table Legends
Supplementary Table 1	Genomic inflation factors for genome-wide association studies of all metabolites. The Lambda refers to the genome-wide association study genomic inflation factor and SE the standard error of the estimate. Results for all the available metabolites are shown. Metabolite names starting with 'X' are unacharacterized metabolites whose identity are not fully known.
Supplementary Table 2	SNP Chip LDscore-based heritability estimates for all the available metabolites. LD score-based SNP Chip heritability estimates for each of the metabolites studied. The estimates were derived by the analysis of GWAS summary results using the Ldscore software and the SE field denotes the standard error of the estimation. Results are sorted in descending order by the estimate of heritability. Metab…
Supplementary Table 3	Genomic regions and markers most significantly associated with metabolite levels. Here 'Region' denotes any contiguous genomic region (>1Mbp apart from adjacent ones) associated with the levels of any metabolic markers, the 'Beta' and 'SE' fields denote the linear regression coefficient for the reference allele ('Ref allele') and standard error of estimation respectively, 'Coding variant' explain…
Supplementary Table 4	Additional SNPs identified associated with metabolite levels following Co-Jo condtional analyses. Here 'Beta' and 'SE' fields denote the linear regression coefficient for the reference allele ('Ref allele') and standard error of estimation respectively, before (i.e. from the same GWAS analyses as the results reported in the Table S3) and after the Co-Jo conditional analyses. 'Metabolites' show th…
Supplementary Table 5	Summary of the most significant eQTL effects for a selection of variants most significantly associated with metabolite levels. Here 'Gene ID' denotes the gene for whose transcript the eQTL is reported, 'Chr' and 'Pos' the chromosomic location and the base pair position (b37) for the SNP variant ('SNP ID'), 'NES' means the normalized effect size' as calculated by the GTEx, and 'Tissue' specifies w…
Supplementary Table 6	Selection of the most significant Ldscore-based genomic correlations between analyzed metabolites and other GWAS traits. Selection of the strongest genetic correlations observed between all the metabolites studied and GWAS of other traits available through the LDscore Hub portal. In additio to the metabolite name 'Phenotype' denotes the phenotype for which the correlation with the given 'Metaboli…
Supplementary Table 7	Concordance of results and replication between the GWAS in the NIHR Bioresource discovery cohort and the KORA cohort. 'SNP', 'Chr' and 'Pos' denote the SNP variant ID, the chromosomal and basepair position in the chromosome respectively. 'Beta.Br', 'SE.Br' and 'Pval.Br" denote the linear regression coefficient, standard error and the association probability for the reference variant ('Ref. allele…
Supplementary Table 8	Novel genomic regions associated with metabolite levels, identified as a result of a meta-analysis between the NIHR Bioresource and the KORA cohorts. The 'Chr' and 'Pos' refer to chromosomal and base-pair location (b37) of the variant ('SNP ID'), 'Nearest Gene' is the gene physicaly located nearest to that marker, 'ref. allele' is the allele for which the effect ('Beta') is being reported, 'SE' i…
Supplementary Table 9	Genome-wide significant (p<5e-08) results for SNP x Sex interactions. The "Chr" and "Pos" refer to the location of the SNPs in the genome (b37), 'ref. allele' is the allele for which the effect ('Beta') is being reported, 'SE' is the standard error of the effect size estimation, 'P' the probability, and 'Metabolite' the molecule for which association is reported.

## Sheet: Table S1
Metabolite	Lambda	Ldsc Intercept (SE)
(S)-a-amino-omega-caprolactam (X - 13737)	1.0165	1.0032 (0.0071)
1-(1-enyl-oleoyl)-2-docosahexaenoyl-GPE (P-18:1/22:6)*	1.0046	1.0117 (0.0067)
1-(1-enyl-oleoyl)-GPC (P-18:1)*	1.0135	1.0011 (0.0061)
1-(1-enyl-oleoyl)-GPE (P-18:1)*	0.9868	1.0087 (0.0071)
1-(1-enyl-palmitoyl)-2-arachidonoyl-GPC (P-16:0/20:4)*	1.0315	0.9989 (0.0064)
1-(1-enyl-palmitoyl)-2-arachidonoyl-GPE (P-16:0/20:4)*	1.0135	0.9984 (0.0069)
1-(1-enyl-palmitoyl)-2-docosahexaenoyl-GPC (P-16:0/22:6)*	0.9986	1.0113 (0.0063)
1-(1-enyl-palmitoyl)-2-docosahexaenoyl-GPE (P-16:0/22:6)*	1.0075	1.0025 (0.0071)
1-(1-enyl-palmitoyl)-2-linoleoyl-GPC (P-16:0/18:2)*	1.0105	0.9961 (0.0062)
1-(1-enyl-palmitoyl)-2-linoleoyl-GPE (P-16:0/18:2)*	1.0195	1.0025 (0.0067)
1-(1-enyl-palmitoyl)-2-myristoyl-GPC (P-16:0/14:0)*	1.0165	1.011 (0.0071)
1-(1-enyl-palmitoyl)-2-oleoyl-GPC (P-16:0/18:1)*	1.0105	0.99 (0.0063)
1-(1-enyl-palmitoyl)-2-oleoyl-GPE (P-16:0/18:1)*	1.0135	1.001 (0.0068)
1-(1-enyl-palmitoyl)-2-palmitoleoyl-GPC (P-16:0/16:1)*	0.9927	1.0177 (0.0067)
1-(1-enyl-palmitoyl)-2-palmitoyl-GPC (P-16:0/16:0)*	1.0195	0.9936 (0.0063)
1-(1-enyl-palmitoyl)-GPC (P-16:0)*	1.0135	1.0067 (0.0069)
1-(1-enyl-palmitoyl)-GPE (P-16:0)*	0.9986	1.0047 (0.0061)
1-(1-enyl-stearoyl)-2-arachidonoyl-GPC (P-18:0/20:4)	1.0255	0.994 (0.0064)
1-(1-enyl-stearoyl)-2-arachidonoyl-GPE (P-18:0/20:4)*	1.0135	0.9997 (0.0059)
1-(1-enyl-stearoyl)-2-docosahexaenoyl-GPC (P-18:0/22:6)*	1.0075	0.9509 (0.047)
1-(1-enyl-stearoyl)-2-docosahexaenoyl-GPE (P-18:0/22:6)*	1.0105	1.0088 (0.006)
1-(1-enyl-stearoyl)-2-linoleoyl-GPC (P-18:0/18:2)*	1.0046	1.0048 (0.007)
1-(1-enyl-stearoyl)-2-linoleoyl-GPE (P-18:0/18:2)*	1.0105	0.9926 (0.007)
1-(1-enyl-stearoyl)-2-oleoyl-GPC (P-18:0/18:1)	0.9986	1.0047 (0.0061)
1-(1-enyl-stearoyl)-2-oleoyl-GPE (P-18:0/18:1)	1.0105	1.0065 (0.0068)
1-(1-enyl-stearoyl)-GPC (P-18:0) *	1.0255	1.0077 (0.0059)
1-(1-enyl-stearoyl)-GPE (P-18:0)*	1.0105	1.0056 (0.0061)
1,2,3-benzenetriol sulfate (2)	0.9927	1.0051 (0.0072)
1,2-dilinoleoyl-GPC (18:2/18:2)	1.0046	1.0117 (0.0067)
1,2-dipalmitoyl-GPC (16:0/16:0)	1.0016	0.9937 (0.0071)
1,3,7-trimethylurate	1.0046	1.0034 (0.0065)
1,3-dimethylurate	1.0075	1.0007 (0.0066)
1,5-anhydroglucitol (1,5-AG)	1.0016	0.9924 (0.007)
1,7-dimethylurate	1.0135	1.0011 (0.0061)
10-heptadecenoate (17:1n7)	1.0165	1.0156 (0.0067)
10-nonadecenoate (19:1n9)	0.9927	0.9991 (0.0067)
10-undecenoate (11:1n1)	1.0135	0.9606 (0.038)
11beta-hydroxyandrosterone glucuronide (X - 12846)	1.0165	1.0104 (0.0068)
12,13-DiHOME	1.0105	1.0055 (0.0067)
13-HODE + 9-HODE	1.0165	1.0049 (0.0059)
15-methylpalmitate	1.0225	0.9566 (0.0434)
16a-hydroxy DHEA 3-sulfate	1.0135	1.0003 (0.0069)
16-hydroxypalmitate	1.0165	1.0009 (0.0067)
17-methylstearate	1.0105	1.0024 (0.0071)
1-adrenoyl-GPC (22:4)*	1.0195	0.9971 (0.0064)
1-arachidonoyl-GPC (20:4n6)*	1.0105	1.0056 (0.0061)
1-arachidonoyl-GPE (20:4n6)*	1.0225	1.0032 (0.0066)
1-arachidonoyl-GPI (20:4)*	1.0165	1.0052 (0.0063)
1-arachidoyl-2-arachidonoyl-GPC (20:0/20:4)*	1.0016	1.003 (0.0063)
1-arachidoyl-GPC (20:0)	1.0105	0.9948 (0.0065)
1-carboxyethylphenylalanine (X - 15497)	1.0195	1.0089 (0.007)
1-dihomo-linolenoyl-GPC (20:3n3 or 6)*	1.0195	1.0025 (0.0068)
1-dihomo-linolenoyl-GPE (20:3n3 or 6)*	1.0165	1.0053 (0.0064)
1-dihomo-linoleoyl-GPC (20:2)*	1.0165	1.0007 (0.0071)
1-docosahexaenoyl-GPC (22:6)*	1.0105	1.0135 (0.007)
1-docosahexaenoyl-GPE (22:6)*	1.0046	0.9982 (0.0068)
1-docosapentaenoyl-GPC (22:5n3)*	1.0075	0.9908 (0.0059)
1-eicosapentaenoyl-GPC (20:5)*	1.0195	1.0082 (0.0067)
1-eicosapentaenoyl-GPE (20:5)*	1.0135	0.9998 (0.0058)
1-eicosenoyl-GPC (20:1)*	1.0016	1.008 (0.0065)
1-lignoceroyl-GPC (24:0)	1.0105	1.0021 (0.0069)
1-linolenoyl-GPC (18:3)*	1.0165	1.0069 (0.0073)
1-linoleoyl-2-docosahexaenoyl-GPC (18:2/22:6)*	0.9986	1.0016 (0.0066)
1-linoleoyl-2-linolenoyl-GPC (18:2/18:3)*	1.0165	1.0003 (0.0076)
1-linoleoylglycerol (18:2)	1.0075	0.9908 (0.0059)
1-linoleoyl-GPC (18:2)	1.0105	1.0134 (0.0071)
1-linoleoyl-GPE (18:2)*	1.0165	1.009 (0.0061)
1-linoleoyl-GPI (18:2)*	1.0165	1.0023 (0.0074)
1-margaroyl-2-arachidonoyl-GPC (17:0/20:4)*	1.0225	0.9963 (0.0092)
1-margaroyl-2-docosahexaenoyl-GPC (17:0/22:6)*	1.0315	1.0116 (0.0132)
1-margaroyl-GPC (17:0)	1.0135	1.0061 (0.007)
1-methyl-5-imidazoleacetate (X - 14838)	1.0075	1.0042 (0.0065)
1-methylhistidine	1.0046	0.9992 (0.0067)
1-methylimidazoleacetate	1.0105	0.9967 (0.007)
1-methylnicotinamide	1.0105	1.001 (0.0069)
1-methylxanthine	1.0075	0.9964 (0.0065)
1-myristoyl-2-arachidonoyl-GPC (14:0/20:4)*	1.0135	1.0121 (0.0064)
1-myristoyl-2-docosahexaenoyl-GPC (14:0/22:6)*	1.0165	0.9913 (0.0067)
1-myristoyl-2-linoleoyl-GPC (14:0/18:2)*	1.0135	1.0143 (0.0066)
1-myristoyl-2-palmitoyl-GPC (14:0/16:0)	1.0345	0.9914 (0.0132)
1-myristoyl-GPC (14:0)	1.0195	1.0091 (0.0072)
1-nonadecanoyl-GPC (19:0)	1.0105	1.0001 (0.0064)
1-oleoyl-2-docosahexaenoyl-GPC (18:1/22:6)*	1.0046	0.9951 (0.007)
1-oleoyl-GPC (18:1)	1.0255	1.0082 (0.0071)
1-oleoyl-GPE (18:1)	1.0016	1.0001 (0.0061)
1-oleoyl-GPI (18:1)*	1.0105	0.9908 (0.0068)
1-palmitoleoyl-GPC (16:1)*	1.0075	0.9994 (0.0061)
1-palmitoleoyl-GPE (16:1)*	1.0135	1.0019 (0.0067)
1-palmitoyl-2-arachidonoyl-GPC (16:0/20:4n6)	0.9957	0.9996 (0.0069)
1-palmitoyl-2-arachidonoyl-GPE (16:0/20:4)*	0.9957	0.9981 (0.0067)
1-palmitoyl-2-arachidonoyl-GPI (16:0/20:4)*	1.0405	1.0064 (0.0062)
1-palmitoyl-2-docosahexaenoyl-GPC (16:0/22:6)	1.0046	1.0261 (0.0144)
1-palmitoyl-2-docosahexaenoyl-GPE (16:0/22:6)*	1.0255	1.0053 (0.0063)
1-palmitoyl-2-eicosapentaenoyl-GPC (16:0/20:5)*	1.0255	1.0081 (0.0069)
1-palmitoyl-2-eicosapentaenoyl-GPE (16:0/20:5)*	1.0195	0.9986 (0.0067)
1-palmitoyl-2-linoleoyl-GPC (16:0/18:2)	1.0195	0.9931 (0.0071)
1-palmitoyl-2-linoleoyl-GPE (16:0/18:2)	1.0225	1.0084 (0.0072)
1-palmitoyl-2-linoleoyl-GPI (16:0/18:2)	1.0016	1.0075 (0.0065)
1-palmitoyl-2-oleoyl-GPC (16:0/18:1)	1.0135	1.002 (0.0067)
1-palmitoyl-2-oleoyl-GPE (16:0/18:1)	1.0285	1.0202 (0.0072)
1-palmitoyl-2-oleoyl-GPI (16:0/18:1)*	0.9898	1.0034 (0.0064)
1-palmitoyl-2-palmitoleoyl-GPC (16:0/16:1)*	0.9957	1.0043 (0.0067)
1-palmitoyl-2-stearoyl-GPC (16:0/18:0)	1.0255	1.0033 (0.0073)
1-palmitoyl-GPC (16:0)	1.0135	0.9957 (0.0065)
1-palmitoyl-GPE (16:0)	1.0135	0.9967 (0.0068)
1-palmitoyl-GPI (16:0)	0.9927	0.9993 (0.0062)
1-palmityl-2-arachidonoyl-GPC (O-16:0/20:4)*	0.9957	1.0057 (0.0058)
1-palmityl-2-linoleoyl-GPC (O-16:0/18:2)*	1.0165	1.0041 (0.0086)
1-palmityl-2-oleoyl-GPC (O-16:0/18:1)*	1.0255	1.0138 (0.0071)
1-palmityl-2-palmitoyl-GPC (O-16:0/16:0)*	1.0046	1.0095 (0.008)
1-palmityl-2-stearoyl-GPC (O-16:0/18:0)*	1.0135	1.0043 (0.0057)
1-palmityl-GPC (O-16:0)	1.0195	0.9928 (0.0065)
1-pentadecanoyl-2-arachidonoyl-GPC (15:0/20:4)*	1.0165	0.9979 (0.0095)
1-pentadecanoyl-2-docosahexaenoyl-GPC (15:0/22:6)*	0.9957	0.9966 (0.006)
1-pentadecanoyl-GPC (15:0)*	1.0105	0.993 (0.0056)
1-ribosyl-imidazoleacetate* (X - 11334)	1.0195	1.0021 (0.0065)
1-stearoyl-2-adrenoyl-GPC (18:0/22:4)*	1.0195	0.992 (0.0074)
1-stearoyl-2-arachidonoyl-GPC (18:0/20:4)	0.9927	0.9993 (0.0062)
1-stearoyl-2-arachidonoyl-GPE (18:0/20:4)	1.0016	1.0075 (0.0065)
1-stearoyl-2-arachidonoyl-GPI (18:0/20:4)	1.0165	1.0014 (0.0061)
1-stearoyl-2-dihomo-linolenoyl-GPC (18:0/20:3n3 or 6)*	1.0165	0.997 (0.0062)
1-stearoyl-2-dihomo-linolenoyl-GPI (18:0/20:3n3 or 6)*	1.0135	1.0211 (0.0065)
1-stearoyl-2-docosahexaenoyl-GPC (18:0/22:6)	1.0046	0.991 (0.0059)
1-stearoyl-2-docosahexaenoyl-GPE (18:0/22:6)*	0.9898	1.0034 (0.0064)
1-stearoyl-2-docosapentaenoyl-GPC (18:0/22:5n3)*	1.0075	0.986 (0.0068)
1-stearoyl-2-docosapentaenoyl-GPC (18:0/22:5n6)*	1.0075	0.986 (0.0068)
1-stearoyl-2-linoleoyl-GPC (18:0/18:2)*	1.0195	1.0036 (0.0067)
1-stearoyl-2-linoleoyl-GPE (18:0/18:2)*	1.0255	1.0022 (0.0065)
1-stearoyl-2-linoleoyl-GPI (18:0/18:2)	1.0165	1.0009 (0.0067)
1-stearoyl-2-oleoyl-GPC (18:0/18:1)	1.0046	0.9945 (0.0063)
1-stearoyl-2-oleoyl-GPE (18:0/18:1)	0.9957	1.0093 (0.0064)
1-stearoyl-GPC (18:0)	1.0285	0.9938 (0.0085)
1-stearoyl-GPE (18:0)	1.0075	0.986 (0.0068)
1-stearoyl-GPI (18:0)	0.9986	0.9986 (0.0066)
1-stearyl-GPC (O-18:0)*	0.9898	1.0019 (0.0063)
2,3-dihydroxy-5-methylthio-4-pentenoate (DMTPA)* (X - 11564)	1.0225	1.0062 (0.0071)
2,3-dihydroxyisovalerate	1.0255	0.9956 (0.0065)
2,6-dihydroxybenzoic acid (X - 09789)	1.0195	0.9985 (0.0067)
21-hydroxypregnenolone disulfate	0.9986	0.9992 (0.0065)
2-aminoadipate	1.0195	1.0014 (0.007)
2-aminobutyrate	1.0135	1.0011 (0.0067)
2-aminoheptanoate	1.0135	0.9986 (0.0066)
2-aminooctanoate	1.0135	1.0029 (0.0067)
2-aminophenol sulfate	1.0165	1.013 (0.0108)
2-arachidonoyl-GPC (20:4)*	1.0225	1.0066 (0.0065)
2-arachidonoyl-GPE (20:4)*	1.0195	1.0097 (0.0069)
2-docosahexaenoyl-GPC (22:6)*	1.0225	0.9824 (0.0146)
2-hydroxy-3-methylvalerate	1.0105	1.0022 (0.0062)
2-hydroxybutyrate/2-hydroxyisobutyrate	1.0225	1.0037 (0.0097)
2-hydroxydecanoate	1.0046	1.0002 (0.0065)
2-hydroxyglutarate	0.9957	0.9996 (0.0059)
2-hydroxyhippurate (salicylurate)	0.9986	1.0011 (0.0069)
2-hydroxyoctanoate	1.0315	0.9927 (0.0063)
2-hydroxypalmitate	1.0075	1.0024 (0.0074)
2-hydroxystearate	1.0255	1.0008 (0.0069)
2-linoleoyl-GPC (18:2)*	1.0046	1.0127 (0.007)
2-linoleoyl-GPE (18:2)*	0.9986	0.9997 (0.0066)
2-methylbutyrylcarnitine (C5)	1.0225	1.0009 (0.0064)
2-myristoyl-GPC (14:0)*	1.0225	1.0107 (0.0067)
2-oleoyl-GPC (18:1)*	1.0075	0.996 (0.006)
2-oleoyl-GPE (18:1)*	1.0135	1.0078 (0.0071)
2-oxoarginine*	1.0135	1.0084 (0.0069)
2-palmitoyl-GPC (16:0)*	1.0105	1.0047 (0.0067)
2-palmitoyl-GPE (16:0)*	1.0165	1.0034 (0.0062)
2-stearoyl-GPE (18:0)*	1.0165	1.0017 (0.0065)
3-(4-hydroxyphenyl)lactate	1.0466	0.9911 (0.0073)
3-amino-2-piperidone (X - 24766)	1.0195	1.0271 (0.0084)
3-aminoisobutyrate	1.0225	1.0115 (0.0089)
3-carboxy-4-methyl-5-pentyl-2-furanpropionate (3-CMPFP)** (X - 02249)	1.0075	1.0103 (0.0074)
3-carboxy-4-methyl-5-propyl-2-furanpropanoate (CMPF)	1.0165	1.0064 (0.0082)
3-formylindole (X - 16071)	1.0649	1.0464 (0.0084)
3-hydroxy-2-ethylpropionate	1.0075	1.0003 (0.0067)
3-hydroxy-3-methylglutarate	1.0255	1.0022 (0.0067)
3-hydroxy-5-cholestenoic acid	1.0075	1.012 (0.0068)
3-hydroxybutyrate (BHBA)	1.0375	1.0123 (0.0069)
3-hydroxydecanoate	1.0436	1.006 (0.0071)
3-hydroxyhexanoate	1.0016	0.9986 (0.0066)
3-hydroxyhippurate	1.0135	1.0035 (0.0074)
3-hydroxyisobutyrate	1.0105	1.0125 (0.0072)
3-hydroxylaurate	1.0016	0.9997 (0.0063)
3-hydroxyoctanoate	1.0016	1.0072 (0.0065)
3-hydroxypyridine sulfate	1.0165	1.0145 (0.0063)
3-indoxyl sulfate	1.0016	1.0072 (0.0065)
3-methoxycatechol sulfate (1)	1.0105	0.9907 (0.0242)
3-methoxytyrosine	1.0165	1.0144 (0.0089)
3-methyl catechol sulfate (1)	1.0016	0.996 (0.007)
3-methyl-2-oxobutyrate	1.0285	0.9932 (0.0068)
3-methyl-2-oxovalerate	1.0075	1.0052 (0.0064)
3-methylhistidine	0.9957	0.9928 (0.0072)
3-methylxanthine	0.9957	0.9961 (0.0064)
3-phenylpropionate (hydrocinnamate)	1.0016	1.0019 (0.0066)
3-phosphoglycerate	1.0105	1.0019 (0.0065)
3-ureidopropionate	1.0195	0.9918 (0.0082)
4-acetamidobutanoate	1.0046	0.9931 (0.0065)
4-allylcatechol sulfate (X - 12212)	1.0075	0.9604 (0.0326)
4-allylphenol sulfate	1.0165	1.002 (0.0068)
4-androsten-3alpha,17alpha-diol monosulfate (2)	1.0496	1.0334 (0.0144)
4-androsten-3alpha,17alpha-diol monosulfate (3)	1.0135	0.9947 (0.007)
4-androsten-3beta,17beta-diol disulfate (1)	0.9957	1.0067 (0.0071)
4-androsten-3beta,17beta-diol disulfate (2)	0.9927	1.0028 (0.0086)
4-androsten-3beta,17beta-diol monosulfate (1)	1.0046	0.9976 (0.0068)
4-androsten-3beta,17beta-diol monosulfate (2)	1.0105	1.0025 (0.0063)
4-ethylcatechol sulfate (X - 12230)	1.0075	0.9985 (0.0065)
4-ethylphenylsulfate	1.0105	1.0031 (0.0071)
4-guanidinobutanoate	1.0135	1.0149 (0.0063)
4-hydroxy-2-oxoglutaric acid	1.0436	1.0159 (0.0061)
4-hydroxychlorothalonil	1.0135	1.0013 (0.0064)
4-hydroxyhippurate	1.0195	1.002 (0.0064)
4-hydroxyphenylpyruvate	1.0195	1.0032 (0.0073)
4-methyl-2-oxopentanoate	1.0046	0.9996 (0.0067)
4-methylcatechol sulfate	1.0135	1.0002 (0.0065)
4-vinylphenol sulfate	1.0046	0.993 (0.0065)
5,6-dihydrothymine	1.0527	1.0149 (0.0086)
5,6-dihydrouridine (X - 11429)	1.0405	1.0205 (0.0087)
5-acetylamino-6-amino-3-methyluracil	1.0165	0.9998 (0.0077)
5-acetylamino-6-formylamino-3-methyluracil	1.0075	1.0089 (0.0098)
5alpha-androstan-3alpha,17beta-diol monosulfate (1)	1.0105	1.0033 (0.0062)
5alpha-androstan-3beta,17alpha-diol disulfate	1.0016	0.9948 (0.0064)
5alpha-androstan-3beta,17beta-diol disulfate	1.0105	0.9962 (0.0087)
5alpha-androstan-3beta,17beta-diol monosulfate (2)	1.0285	1.0089 (0.0061)
5alpha-pregnan-3beta,20alpha-diol disulfate	1.0016	1.0125 (0.0071)
5alpha-pregnan-3beta,20alpha-diol monosulfate (2)	1.0105	1.0034 (0.0069)
5alpha-pregnan-3beta,20beta-diol monosulfate (1)	1.0375	1.0072 (0.0074)
5-bromotryptophan	1.0105	1.0031 (0.0075)
5-dodecenoate (12:1n7)	1.0016	1.003 (0.0066)
5-dodecenoylcarnitine (C12:1) (X - 11540)	1.0375	1.0158 (0.0062)
5-hydroxylysine	1.0135	0.9995 (0.0058)
5-methyluridine (ribothymidine)	1.0375	1.0157 (0.007)
5-oxoproline	1.0195	1.0061 (0.0066)
6-hydroxyindole sulfate	1.0165	0.9816 (0.0136)
7-alpha-hydroxy-3-oxo-4-cholestenoate (7-Hoca)	1.0046	1.0027 (0.0063)
7-methylguanine	1.0225	0.9992 (0.0077)
7-methylxanthine	1.0165	0.9972 (0.0072)
9-hydroxystearate	1.0285	0.9968 (0.0101)
acetylcarnitine	1.0165	1.011 (0.0071)
aconitate [cis or trans]	1.0557	1.0205 (0.0062)
adenine	1.0165	1.0128 (0.0072)
adenosine 5'-monophosphate (AMP)	1.0315	1.0178 (0.0066)
adrenate (22:4n6)	1.0165	1.0084 (0.0064)
alanine	1.0016	1.0029 (0.0065)
allantoin	1.0075	0.9934 (0.0065)
alpha-hydroxyisocaproate	1.0255	0.9975 (0.0113)
alpha-hydroxyisovalerate	1.0195	0.9939 (0.0065)
alpha-ketobutyrate	1.0046	1.0073 (0.0061)
alpha-ketoglutarate	1.0016	1.0113 (0.0065)
alpha-tocopherol	1.0105	1.0012 (0.0073)
andro steroid monosulfate (1)*	1.0046	1.0041 (0.0061)
androsterone glucuronide (X - 22379)	1.0046	0.9941 (0.0066)
androsterone sulfate	1.0165	1.0118 (0.007)
arabitol/xylitol	1.0165	1.0005 (0.0064)
arabonate/xylonate	1.0075	1.0004 (0.0062)
arachidate (20:0)	1.0195	1.0067 (0.0067)
arachidonate (20:4n6)	1.0165	1.0016 (0.0067)
arachidonoylcholine	1.0255	0.9972 (0.0237)
arginine	1.0225	1.01 (0.0095)
ascorbic acid 3-sulfate* (X - 12206)	1.0255	0.9989 (0.0065)
asparagine	1.0135	0.984 (0.0129)
aspartate	1.0135	1.0071 (0.0076)
azelate (nonanedioate)	1.0075	1.0106 (0.0063)
behenoyl sphingomyelin (d18:1/22:0)*	1.0165	0.996 (0.007)
benzoate	1.0075	1.0007 (0.0066)
beta-citrylglutamate	1.0165	1.0033 (0.0069)
beta-hydroxyisovalerate	1.0225	1.0052 (0.0065)
betaine	1.0016	1.0182 (0.0064)
bilirubin (E,E)*	1.0075	1.0101 (0.0067)
bilirubin (E,Z or Z,E)*	1.0345	1.0074 (0.0069)
bilirubin (Z,Z)	1.0135	0.9968 (0.0064)
biliverdin	1.0195	0.9943 (0.0063)
branched chain 14:0 dicarboxylic acid** (X - 17145)	0.9927	1.0051 (0.0072)
branched-chain, straight-chain, or cyclopropyl 10:1 fatty acid (1)* (X - 23295)	0.9927	0.9973 (0.0072)
branched-chain, straight-chain, or cyclopropyl 12:1 fatty acid* (X - 22764)	1.0105	0.9954 (0.0067)
butyrylcarnitine	1.0255	1.0055 (0.0078)
caffeine	1.0016	1.002 (0.0062)
caprate (10:0)	1.0864	1.0489 (0.0069)
caproate (6:0)	1.0135	1.0012 (0.0068)
caprylate (8:0)	1.0225	1.001 (0.0072)
carnitine	1.0016	0.9933 (0.007)
catechol sulfate	1.0165	0.9983 (0.0091)
C-glycosyltryptophan	1.0165	1.0052 (0.0065)
cholate	1.0046	1.006 (0.0071)
cholesterol	1.0165	1.0102 (0.0085)
choline	1.0225	0.9987 (0.0067)
choline phosphate	1.0046	1.0112 (0.0066)
cinnamoylglycine	1.0165	0.9857 (0.0118)
cis-4-decenoate (10:1n6)* (X - 23293)	1.0075	0.9898 (0.0076)
cis-4-decenoyl carnitine	1.0075	0.9899 (0.0088)
citrate	1.0075	0.9742 (0.0303)
citrulline	1.0165	0.9677 (0.0325)
cortisol	1.0225	1.0038 (0.0074)
cortisone	1.0075	1.0064 (0.007)
cortolone glucuronide (1) (X - 17359)	1.0135	1.002 (0.0069)
creatine	1.0345	1.0025 (0.0071)
creatinine	1.0165	0.9907 (0.0141)
cyclo(pro-val)	1.0135	0.9547 (0.0439)
cys-gly, oxidized	1.0016	0.9954 (0.0068)
cysteine	1.0016	1.0044 (0.0078)
cysteine s-sulfate	1.0225	1.0084 (0.0076)
cysteine-glutathione disulfide	1.0225	0.9984 (0.007)
cysteinylglycine	1.0195	0.9924 (0.0064)
cystine	1.0135	0.999 (0.0065)
cytidine	1.0135	0.9815 (0.0125)
decadienedioic acid (C10:2-DC)** (X - 21792)	1.0165	1.0023 (0.0075)
decanoylcarnitine	1.0075	0.999 (0.007)
dehydroisoandrosterone sulfate (DHEA-S)	1.0195	0.9857 (0.0108)
deoxycarnitine	1.0195	0.9895 (0.0199)
deoxycholate	1.0105	1.0111 (0.0066)
deoxycholic acid glucuronide (X - 11491)	1.0255	0.9999 (0.0069)
diacylglycerol (16:1/18:2 [2], 16:0/18:3 [1])*	1.0345	1.0052 (0.0068)
dihomo-linoleate (20:2n6)	1.0105	1.0082 (0.0069)
dihomo-linolenate (20:3n3 or n6)	1.0075	1.003 (0.0069)
dimethylarginine (SDMA + ADMA)	1.0016	0.9937 (0.0071)
dimethylglycine	1.0105	1.0049 (0.0067)
docosadienoate (22:2n6)	1.0285	1.006 (0.0065)
docosadioate	1.0195	0.9903 (0.0066)
docosahexaenoate (DHA; 22:6n3)	1.0195	0.9884 (0.007)
docosapentaenoate (n3 DPA; 22:5n3)	1.0105	1.0003 (0.0067)
docosapentaenoate (n6 DPA; 22:5n6)	1.0075	1.0007 (0.0066)
dodecadienoate (12:2)* (X - 21343)	1.0195	0.9565 (0.0333)
dodecanedioate	1.0016	1.0014 (0.0068)
dopamine sulfate (2)	1.0195	0.9948 (0.0067)
EDTA	1.0105	1.0065 (0.0064)
eicosanodioate	1.0105	0.9976 (0.007)
eicosapentaenoate (EPA; 20:5n3)	1.0285	0.9989 (0.0078)
eicosenoate (20:1)	1.0016	0.9937 (0.0071)
epiandrosterone sulfate	1.0165	0.9833 (0.0105)
ergothioneine	1.0195	0.9978 (0.0068)
erucate (22:1n9)	1.0195	1.0025 (0.0067)
erythritol	1.0225	0.9867 (0.0067)
erythronate*	1.0135	1.0077 (0.007)
ethyl alpha-glucopyranoside (X - 24293)	1.0375	1.0038 (0.0116)
ethyl beta-glucopyranoside (X - 23314)	1.0075	1.0007 (0.0066)
ethylmalonate	1.0165	1.011 (0.0071)
etiocholanolone glucuronide	1.0255	1.0183 (0.0074)
fructose	1.0135	1.0046 (0.007)
fumarate	1.0105	1.0008 (0.0068)
galactonate	1.0195	0.9924 (0.007)
gamma-CEHC	1.0315	1.0136 (0.0071)
gamma-glutamyl-alpha-lysine	1.0016	1.0006 (0.0061)
gamma-glutamylcitrulline* (X - 24449)	1.0195	1.0106 (0.0069)
gamma-glutamyl-epsilon-lysine	1.0195	0.9947 (0.0075)
gamma-glutamylglutamate	1.0195	1.0091 (0.0067)
gamma-glutamylglutamine	1.0165	0.9913 (0.0064)
gamma-glutamylglycine	0.9898	1.0114 (0.0071)
gamma-glutamylhistidine	0.9957	1.0053 (0.0078)
gamma-glutamylisoleucine*	1.0225	1.0069 (0.0063)
gamma-glutamylleucine	1.0195	1.0046 (0.0077)
gamma-glutamylmethionine	1.0046	0.996 (0.0067)
gamma-glutamylphenylalanine	1.0165	0.9965 (0.0067)
gamma-glutamylthreonine	1.0135	1.002 (0.0074)
gamma-glutamyltyrosine	1.0165	1.0089 (0.0067)
gamma-glutamylvaline	1.0135	1.0042 (0.006)
gamma-tocopherol/beta-tocopherol	1.0649	1.0277 (0.0076)
gentisate	1.0165	1.0027 (0.0066)
gluconate	1.0225	1.0162 (0.0065)
glucose	1.0016	1.0085 (0.0069)
glucuronate	1.0375	1.012 (0.0097)
glucuronide of piperine metabolite C17H21NO3 (4)* (X - 01911)	1.0165	1.0031 (0.0067)
glutamate	1.0255	0.9983 (0.0069)
glutamine	1.0405	1.006 (0.007)
glutamine conjugate of C6H10O2 (2)* (X - 12472)	1.0225	1.0085 (0.0065)
glutamine conjugate of C7H12O2* (X - 17327)	1.0016	0.996 (0.0066)
glutarate (pentanedioate)	1.0225	0.9994 (0.007)
glycerate	1.0165	1.0012 (0.0064)
glycerol	1.0046	1.0066 (0.0059)
glycerophosphoethanolamine	1.0016	0.9968 (0.0064)
glycerophosphorylcholine (GPC)	1.0016	0.9937 (0.0071)
glycine	1.0135	1.0011 (0.0061)
glycochenodeoxycholate	1.0075	1.0101 (0.0062)
glycochenodeoxycholate glucuronide (1)	1.0255	1.008 (0.007)
glycochenodeoxycholate sulfate	1.0105	0.9989 (0.0073)
glycocholate	1.0075	0.9976 (0.006)
glycocholenate sulfate*	0.9986	0.9971 (0.0067)
glycodeoxycholate sulfate	1.0195	0.9933 (0.0081)
glycolithocholate sulfate*	1.0075	0.9905 (0.0065)
glycosyl-N-palmitoyl-sphingosine (d18:1/16:0)	1.0105	0.9969 (0.0063)
glycosyl-N-stearoyl-sphingosine (d18:1/18:0)	1.0046	1.0117 (0.0067)
glycoursodeoxycholate	1.0135	1.0134 (0.0065)
guanidinoacetate	1.0195	0.9887 (0.0064)
gulonate*	1.0075	0.9978 (0.0061)
hexadecadienoate (16:2n6) (X - 12450)	1.0016	0.9937 (0.0071)
hexadecanedioate	1.0075	0.9962 (0.0062)
hexadecenedioate (C16:1-DC)* (X - 11905)	1.0225	1.0107 (0.0112)
hexanoylcarnitine	1.0105	0.9796 (0.0194)
hippurate	1.0075	0.9768 (0.0217)
histidine	1.0046	0.9952 (0.0071)
homoarginine	0.9957	1.0019 (0.006)
homocitrulline	0.9986	1.0043 (0.0063)
homostachydrine*	1.0105	1.001 (0.0074)
hydantoin-5-propionic acid	1.0195	1.0123 (0.007)
hydroxy-CMPF* (X - 02269)	1.071	1.0267 (0.007)
hypotaurine	1.0165	1.0042 (0.0072)
hypoxanthine	1.0225	0.9944 (0.0062)
imidazole lactate	1.0135	1.0175 (0.0095)
iminodiacetate (IDA)	1.0046	0.9981 (0.0062)
indoleacetate	1.0046	1.0131 (0.0079)
indolelactate	1.0105	0.9899 (0.0065)
indolepropionate	1.0016	1.0077 (0.0062)
isobutyrylcarnitine	1.0135	0.9951 (0.01)
isoleucine	1.0016	1.0149 (0.0057)
isoleucylleucine/leucylisoleucine	0.9986	1.003 (0.0076)
isoursodeoxycholate (X - 21666)	1.0046	0.9969 (0.0069)
isovalerylcarnitine	1.0046	1.0031 (0.0061)
kynurenate	1.0105	0.9873 (0.0067)
kynurenine	1.0075	0.9941 (0.0071)
lactate	0.9986	1.0113 (0.0063)
lactosyl-N-palmitoyl-sphingosine (d18:1/16:0)	1.0195	1.0078 (0.0065)
laurate (12:0)	1.0135	1.004 (0.0067)
laurylcarnitine	1.0496	1.011 (0.007)
leucine	1.0165	1.0118 (0.0074)
linoleate (18:2n6)	1.0195	1.0003 (0.0063)
linolenate [alpha or gamma; (18:3n3 or 6)]	1.0135	1.0007 (0.007)
linoleoyl ethanolamide	1.0105	1.0086 (0.0067)
linoleoyl-arachidonoyl-glycerol (18:2/20:4) [1]*	1.0016	0.995 (0.0064)
linoleoyl-arachidonoyl-glycerol (18:2/20:4) [2]*	0.9927	1.0051 (0.0072)
linoleoylcarnitine*	1.0075	1.0109 (0.0065)
linoleoyl-linoleoyl-glycerol (18:2/18:2) [1]*	1.0195	0.9927 (0.0102)
lithocholate sulfate (1) (X - 17469)	1.0165	0.9944 (0.0059)
lysine	1.0195	1.0075 (0.0066)
malate	0.9957	0.9996 (0.0069)
maleate	1.0105	1.0071 (0.0076)
maltose	1.0345	0.994 (0.0075)
mannitol/sorbitol	1.0165	1.0002 (0.0064)
mannose	1.0046	0.9562 (0.0424)
margarate (17:0)	1.0165	0.9452 (0.045)
metabolonic lactone sulfate (X - 12063)	1.0105	0.9987 (0.0091)
methionine	0.9898	1.0079 (0.007)
methionine sulfone	1.0105	1.0004 (0.0074)
methionine sulfoxide	1.0075	0.995 (0.0075)
methyl glucopyranoside (alpha + beta)	1.0285	0.9899 (0.0214)
methyl indole-3-acetate	1.0165	1.0013 (0.0065)
methyl-4-hydroxybenzoate sulfate	1.0285	0.9938 (0.0113)
methylsuccinate	1.0405	1.0121 (0.0096)
myo-inositol	1.0375	1.0112 (0.0126)
myristate (14:0)	1.0315	1.001 (0.0068)
myristoleate (14:1n5)	1.0195	1.0018 (0.0076)
myristoleoylcarnitine*	1.0075	0.9963 (0.0065)
myristoylcarnitine	1.0135	0.9889 (0.0059)
N-(2-furoyl)glycine	1.0016	0.9915 (0.0084)
N,N-dimethylalanine (X - 23585)	1.0105	0.9792 (0.021)
N1-Methyl-2-pyridone-5-carboxamide	0.9986	0.9914 (0.0057)
N1-methyladenosine	1.0105	1.0016 (0.0065)
N1-methylinosine	1.0285	0.9996 (0.0116)
N2,N2-dimethylguanosine	1.0075	0.9975 (0.0068)
N4-acetylcytidine	1.0255	1.0069 (0.0067)
N6,N6,N6-trimethyllysine	1.0046	0.999 (0.0058)
N6-acetyllysine	0.9986	0.9913 (0.007)
N-acetyl-2-aminooctanoate* (X - 12511)	1.0618	1.0317 (0.0069)
N-acetylalanine	1.0195	0.9949 (0.0072)
N-acetylarginine	1.0105	1.006 (0.0074)
N-acetylaspartate (NAA)	1.0135	0.9938 (0.0109)
N-acetyl-beta-alanine	1.0105	1.0022 (0.0063)
N-acetylcarnosine	1.0285	0.9969 (0.0068)
N-acetylglucosamine/N-acetylgalactosamine	1.0046	0.9564 (0.0446)
N-acetylglutamate	1.0255	1.0012 (0.0076)
N-acetylglutamine	1.0105	1.0122 (0.0066)
N-acetylglycine	1.0285	1.0177 (0.0073)
N-acetylhistidine	1.0285	1.0116 (0.0073)
N-acetyl-isoputreanine* (X - 12688)	1.0255	1.0037 (0.007)
N-acetylleucine	1.0255	1.002 (0.0068)
N-acetylmethionine	1.0046	1.0021 (0.007)
N-acetylneuraminate	1.0195	1.0009 (0.0068)
N-acetylphenylalanine	1.0105	1.0018 (0.0068)
N-acetylputrescine	1.0135	0.9987 (0.0069)
N-acetylserine	1.0315	0.997 (0.0077)
N-acetyltaurine	1.0135	1.0185 (0.0066)
N-acetylthreonine	1.0285	1. (0.0111)
N-delta-acetylornithine	1.021	1.0005 (0.0075)
N-formylmethionine	1.0225	0.9999 (0.0091)
nicotinamide	1.0135	0.9968 (0.0065)
N-methylpipecolate	0.9957	0.9959 (0.0064)
N-methylproline	1.0375	1.0207 (0.0079)
nonadecanoate (19:0)	0.9986	0.9985 (0.0061)
N-palmitoylglycine	1.0075	0.9957 (0.006)
N-palmitoyl-sphinganine (d18:0/16:0)	1.0075	1.0007 (0.0066)
N-palmitoyl-sphingosine (d18:1/16:0)	1.0105	0.997 (0.0063)
N-stearoyl-sphingosine (d18:1/18:0)*	1.0016	1.0079 (0.0062)
N-trimethyl 5-aminovalerate (X - 21365)	1.0255	1.0016 (0.0066)
octadecenedioate (C18:1-DC)* (X - 11538)	1.0135	1.0081 (0.0069)
octanoylcarnitine	1.0466	1.0115 (0.0071)
oleate/vaccenate (18:1)	1.0255	0.9989 (0.0065)
oleoyl ethanolamide	1.0135	1.0023 (0.0075)
oleoyl-arachidonoyl-glycerol (18:1/20:4) [2]*	1.0255	1.0107 (0.0074)
oleoylcarnitine	1.0225	0.9902 (0.0069)
oleoylcholine	1.0195	1.0006 (0.0067)
oleoyl-linoleoyl-glycerol (18:1/18:2) [1]	1.0046	1.0261 (0.0144)
oleoyl-linoleoyl-glycerol (18:1/18:2) [2]	1.0075	0.9994 (0.0058)
oleoyl-oleoyl-glycerol (18:1/18:1) [1]*	1.0135	0.9986 (0.0065)
oleoyl-oleoyl-glycerol (18:1/18:1) [2]*	1.0255	0.9947 (0.0065)
O-methylcatechol sulfate	1.0105	0.9992 (0.0072)
ornithine	1.0165	1.0069 (0.0064)
orotate	1.0046	0.9975 (0.0061)
orotidine	1.0195	0.9899 (0.0064)
O-sulfo-L-tyrosine	1.0075	0.9899 (0.0069)
oxalate (ethanedioate)	0.9927	1.0051 (0.0072)
palmitate (16:0)	1.0135	1.0013 (0.0073)
palmitoleate (16:1n7)	1.0016	0.994 (0.007)
palmitoleoylcarnitine*	1.0833	1.0541 (0.0084)
palmitoleoyl-linoleoyl-glycerol (16:1/18:2) [1]*	1.0046	1.0133 (0.0091)
palmitoyl dihydrosphingomyelin (d18:0/16:0)*	1.0105	0.9934 (0.0071)
palmitoyl sphingomyelin (d18:1/16:0)	1.0195	1.012 (0.0081)
palmitoyl-arachidonoyl-glycerol (16:0/20:4) [2]*	1.0075	0.9711 (0.0229)
palmitoylcarnitine	1.0046	0.9923 (0.0084)
palmitoylcholine	1.0165	1.0026 (0.0064)
palmitoyl-linoleoyl-glycerol (16:0/18:2) [1]*	1.0195	1.0065 (0.0066)
palmitoyl-linoleoyl-glycerol (16:0/18:2) [2]*	1.0195	0.9964 (0.0068)
palmitoyl-oleoyl-glycerol (16:0/18:1) [2]*	1.0496	1.0323 (0.0066)
palmitoyl-sphingosine-phosphoethanolamine (d18:1/16:0) (X - 24106)	1.0105	1.013 (0.0084)
pantothenate	1.0075	0.9944 (0.0069)
paraxanthine	1.0016	0.9979 (0.0055)
p-cresol sulfate	1.0135	0.9895 (0.006)
p-cresol-glucuronide*	1.0135	1.0001 (0.0074)
phenol sulfate	1.0046	0.9829 (0.0079)
phenylacetylglutamine	1.0075	1.0007 (0.0066)
phenylalanine	1.0046	0.9985 (0.0063)
phenylalanyltryptophan	1.0105	1.0078 (0.006)
phenyllactate (PLA)	1.0225	0.9957 (0.0072)
phenylpyruvate	1.0165	1.0107 (0.0063)
phosphate	1.0105	1.0012 (0.0068)
phosphatidylcholine (14:0/14:0, 16:0/12:0)	1.0135	1. (0.0061)
phosphatidylcholine (15:0/18:1, 17:0/16:1)*	1.0135	0.9941 (0.0073)
phosphatidylcholine (16:0/22:5n3, 18:1/20:4)*	1.0075	1.0003 (0.0067)
phosphatidylcholine (18:0/20:2, 20:0/18:2, 18:1/20:1)*	1.0195	1.0081 (0.0083)
phosphoethanolamine	1.0075	0.9972 (0.0063)
picolinoylglycine (X - 12170)	0.9868	1.0087 (0.0071)
pipecolate	1.0195	0.9882 (0.0284)
piperine	0.9986	1.0012 (0.0068)
pregn steroid monosulfate*	1.0165	0.9978 (0.007)
pregnanediol-3-glucuronide	1.0255	0.9911 (0.0067)
pregnen-diol disulfate*	1.0105	0.9826 (0.0219)
pregnenetriol disulfate* (X - 11440)	1.0165	0.9907 (0.006)
pregnenolone sulfate	1.0195	1.0051 (0.0072)
pro-hydroxy-pro	1.0255	1.0103 (0.0076)
proline	1.0165	0.9856 (0.02)
propionylcarnitine	1.0225	1.0031 (0.0073)
pseudouridine	1.0195	1.0155 (0.0076)
pyridoxate	1.0255	1.0041 (0.0071)
pyroglutamine*	1.0255	1.0018 (0.007)
pyrraline	1.0075	1.0094 (0.0067)
pyruvate	1.0105	0.987 (0.0068)
quinate	1.0105	1.007 (0.0137)
quinolinate	1.0255	1.0063 (0.0068)
retinol (Vitamin A)	1.0075	1.0103 (0.0064)
ribitol	1.0255	0.9948 (0.0068)
ribonate	1.0165	1.0003 (0.0069)
S-1-pyrroline-5-carboxylate	1.0225	1.0218 (0.0077)
salicylate	1.0165	0.9994 (0.0064)
sarcosine	1.0016	0.9937 (0.0071)
serine	1.0016	1.0004 (0.0066)
serotonin	1.0105	1. (0.006)
S-methylcysteine	1.0165	0.998 (0.007)
spermidine	1.0315	1.0107 (0.0069)
sphinganine	1.0105	1.0035 (0.0068)
sphinganine-1-phosphate	1.0016	0.991 (0.0069)
sphingomyelin (d18:1/14:0, d16:1/16:0)*	1.0075	1.0028 (0.0064)
sphingomyelin (d18:1/15:0, d16:1/17:0)*	1.0165	1.0028 (0.0066)
sphingomyelin (d18:1/17:0, d17:1/18:0, d19:1/16:0)	1.0105	1. (0.0065)
sphingomyelin (d18:1/18:1, d18:2/18:0)	1.0165	0.9977 (0.0077)
sphingomyelin (d18:1/20:0, d16:1/22:0)*	1.0165	1.0088 (0.0087)
sphingomyelin (d18:1/20:1, d18:2/20:0)*	1.0165	0.9947 (0.0067)
sphingomyelin (d18:1/21:0, d17:1/22:0, d16:1/23:0)*	1.0225	0.9942 (0.0071)
sphingomyelin (d18:1/22:1, d18:2/22:0, d16:1/24:1)*	1.0255	0.9904 (0.0068)
sphingomyelin (d18:1/24:1, d18:2/24:0)*	1.0135	0.9984 (0.0071)
sphingomyelin (d18:2/14:0, d18:1/14:1)*	1.0135	0.9917 (0.0063)
sphingomyelin (d18:2/16:0, d18:1/16:1)*	1.0165	0.9929 (0.0066)
sphingomyelin (d18:2/23:0, d18:1/23:1, d17:1/24:1)*	1.0135	0.9987 (0.0067)
sphingomyelin (d18:2/24:1, d18:1/24:2)*	1.0195	0.9912 (0.0065)
sphingosine	1.0225	0.9929 (0.0067)
sphingosine 1-phosphate	1.0195	1.0054 (0.0061)
stachydrine	1.0165	0.9968 (0.0069)
stearate (18:0)	1.0195	0.999 (0.0078)
stearidonate (18:4n3)	1.0135	0.9833 (0.0171)
stearoyl sphingomyelin (d18:1/18:0)	1.0016	0.9939 (0.0088)
stearoylcarnitine	1.0105	0.9997 (0.0069)
succinate	1.0225	1.0164 (0.0064)
succinimide	1.0105	1.0062 (0.0067)
succinylcarnitine	1.0345	1.0076 (0.007)
sulfate of piperine metabolite C16H19NO3 (2)* (X - 11452)	1.0105	1.002 (0.0065)
sulfate of piperine metabolite C16H19NO3 (3)* (X - 12231)	1.0135	0.9966 (0.0067)
sulfate*	1.0345	1.0075 (0.0066)
tartronate (hydroxymalonate)	1.0285	0.9982 (0.0072)
taurine	1.0225	1.0129 (0.007)
taurochenodeoxycholate	1.0135	1.0083 (0.0064)
taurocholate	1.0285	0.9918 (0.0063)
taurocholenate sulfate	1.0195	1.0114 (0.0068)
taurolithocholate 3-sulfate	1.0195	1.0022 (0.0067)
tetradecadienoate (14:2)* (X - 12442)	1.0075	0.9984 (0.0067)
tetradecanedioate	1.0105	1.0013 (0.007)
theobromine	1.0075	0.9939 (0.0064)
theophylline	1.0075	0.9991 (0.0068)
thioproline	1.0165	0.9897 (0.0075)
threonate	1.0165	0.9942 (0.0071)
threonine	1.0225	0.9999 (0.0064)
thymol sulfate	0.9927	1.0028 (0.0086)
thyroxine	1.0225	1.0041 (0.0112)
tiglylcarnitine	1.0195	1.0005 (0.0064)
trans-4-hydroxyproline	1.071	1.0334 (0.0076)
tricosanoyl sphingomyelin (d18:1/23:0)*	1.0165	0.9921 (0.0072)
tridecenedioate (C13:1-DC)* (X - 11438)	1.0165	1.0099 (0.0063)
trigonelline (N'-methylnicotinate)	1.0255	0.994 (0.0064)
trimethylamine N-oxide	1.0195	1.0066 (0.0143)
tryptophan	1.0135	1.0159 (0.0146)
tryptophan betaine	1.0225	1.0099 (0.0099)
tyrosine	1.0285	1.012 (0.0073)
undecenoylcarnitine (C11:1) (X - 17337)	1.0016	0.9975 (0.0076)
uracil	1.0075	1.0076 (0.0089)
urate	1.0046	0.9889 (0.0071)
urea	1.0105	1.0106 (0.0065)
uridine	1.0557	1.0359 (0.0071)
ursodeoxycholate	1.0135	1.0132 (0.0065)
valine	1.0802	1.036 (0.0071)
vanillylmandelate (VMA)	1.0046	1.0001 (0.0064)
X - 11261	1.0195	1.0054 (0.0066)
X - 11299	1.0135	0.996 (0.0069)
X - 11308	1.0105	1.0001 (0.0067)
X - 11315	1.0225	1.0101 (0.007)
X - 11372	1.0105	0.9929 (0.0066)
X - 11381	1.0165	1.0014 (0.0071)
X - 11441	1.0466	1.0178 (0.0069)
X - 11442	1.0345	1.0072 (0.0068)
X - 11444	1.0496	1.0216 (0.0069)
X - 11470	1.0285	1.0168 (0.0075)
X - 11478	1.0345	1.0047 (0.0077)
X - 11483	1.0135	1.0011 (0.0061)
X - 11522	1.0105	0.997 (0.0066)
X - 11530	1.0016	1.001 (0.0065)
X - 11787	1.0588	1.0104 (0.0067)
X - 11795	1.0195	0.9983 (0.0072)
X - 11850	1.0618	1.0475 (0.0098)
X - 11880	1.0255	1.004 (0.0065)
X - 12007	1.0046	1.0041 (0.0071)
X - 12100	1.0135	1.0149 (0.0097)
X - 12101	1.0165	1.0037 (0.0063)
X - 12216	1.0345	0.9921 (0.0068)
X - 12462	1.0255	1.0049 (0.0063)
X - 12524	1.0165	1.0086 (0.0071)
X - 12680	1.0016	1.0064 (0.0068)
X - 12844	1.0225	1.0051 (0.0067)
X - 12847	1.0046	1.0099 (0.0076)
X - 12849	1.0195	1.0027 (0.0069)
X - 13431	1.0255	1.0068 (0.0077)
X - 13684	0.9986	0.9922 (0.0057)
X - 13835	1.0195	1.0086 (0.0068)
X - 13866	1.0285	1.006 (0.0071)
X - 14056	1.0225	0.9944 (0.0072)
X - 14568	1.0285	0.9999 (0.0071)
X - 14939	1.0285	1.0222 (0.0069)
X - 15469	1.0741	1.0342 (0.0075)
X - 15486	1.0195	0.9966 (0.0073)
X - 15492	1.0195	1.0054 (0.0069)
X - 15666	1.0588	1.0118 (0.0097)
X - 16580	1.0105	1.014 (0.007)
X - 16935	1.0588	1.019 (0.0078)
X - 16938	1.0496	1.0239 (0.0076)
X - 16944	1.0285	0.9935 (0.0069)
X - 16946	1.0105	0.9978 (0.006)
X - 16964	1.0285	1.012 (0.0127)
X - 17185	0.9927	0.9774 (0.021)
X - 17325	1.0105	0.9992 (0.0079)
X - 17335	1.0135	1.0116 (0.0062)
X - 17653	1.0165	0.9932 (0.0109)
X - 17654	0.9986	0.9939 (0.0062)
X - 17676	1.0105	0.9535 (0.0445)
X - 17690	1.0135	0.9554 (0.0427)
X - 18899	1.0165	0.9807 (0.0198)
X - 18913	1.0046	0.9998 (0.0069)
X - 18921	1.0135	0.9947 (0.0064)
X - 19141	1.0315	0.9773 (0.0238)
X - 19438	1.0315	1.0059 (0.0064)
X - 21258	1.0285	1.0064 (0.0056)
X - 21286	1.0375	1.0028 (0.0089)
X - 21319	1.0016	0.9756 (0.023)
X - 21339	1.0016	1.0021 (0.006)
X - 21353	1.0135	1.0023 (0.0068)
X - 21358	1.0195	0.998 (0.0079)
X - 21364	0.9927	1.0051 (0.0072)
X - 21383	1.0075	1.0186 (0.0063)
X - 21410	1.0165	1.0068 (0.0064)
X - 21448	1.0046	1.0002 (0.0064)
X - 21467	0.9986	0.9958 (0.0069)
X - 21658	0.9986	0.9957 (0.0071)
X - 21736	1.0016	1.0066 (0.006)
X - 22162	1.0255	0.9779 (0.0285)
X - 22771	1.0165	1.011 (0.0071)
X - 22775	1.0105	0.9988 (0.0065)
X - 23593	1.0135	1.0047 (0.0071)
X - 23636	1.0075	1.0054 (0.0065)
X - 23637	1.0105	0.9982 (0.0066)
X - 23639	1.0135	1.0102 (0.0067)
X - 23644	0.9927	0.9945 (0.0064)
X - 23652	0.9957	1.0082 (0.0063)
X - 23680	1.0195	1.0047 (0.0066)
X - 23739	1.0135	0.9937 (0.0071)
X - 23749	1.0046	1.0011 (0.0068)
X - 23756	1.0046	1.0054 (0.0065)
X - 23765	1.0285	1.0085 (0.0069)
X - 23782	1.0105	1.0038 (0.0064)
X - 23997	1.0135	1.0007 (0.0062)
X - 24020	1.0046	1.0117 (0.0067)
X - 24027	1.0075	1.0081 (0.006)
X - 24243	1.0075	1.0055 (0.0063)
X - 24295	0.9868	0.9991 (0.0066)
X - 24306	1.0075	0.9977 (0.0065)
X - 24307	1.0016	0.9564 (0.041)
X - 24309	1.0105	0.999 (0.0063)
X - 24431	1.0105	0.9961 (0.0062)
X - 24452	1.0075	1.0107 (0.0066)
X - 24512	1.0105	1.0018 (0.0059)
X - 24513	1.0105	0.9979 (0.0062)
X - 24699	1.0046	1.0025 (0.0077)
X - 24738	0.9942	1.0031 (0.0067)
X - 24747	1.0255	0.9951 (0.0067)
X - 24748	1.0075	0.9905 (0.007)
X - 24765	0.9927	1.0105 (0.0065)
X - 24803	1.0105	0.9981 (0.0065)
X - 24804	1.0046	1.0025 (0.0058)
X - 24806	1.0046	1.0111 (0.0067)
X - 24813	1.0075	1.0095 (0.0066)
X - 24831	1.0135	1.0048 (0.0059)
X - 24849	1.0195	1.0018 (0.0059)
X - 24870	1.0046	0.9907 (0.0059)
xanthine	1.0345	1.0039 (0.0067)
xanthurenate	1.0466	1.0227 (0.0068)

## Sheet: Table S2
Metabolite	LD Score-based estimated SNP Chip h2	h2 SE
bilirubin (E,Z or Z,E)*	0.889	0.7354
metabolonic lactone sulfate	0.8397	0.5458
bilirubin (Z,Z)	0.8086	0.7191
biliverdin	0.8036	0.7495
X - 21448	0.7781	0.705
X - 11522	0.7563	0.6932
glycochenodeoxycholate glucuronide (1)	0.7496	0.5495
X - 11530	0.7476	0.6661
N-acetylleucine	0.7441	0.6137
bilirubin (E,E)*	0.7323	0.6796
X - 24849	0.7266	0.7008
ethylmalonate	0.6832	0.6685
X - 16946	0.6735	0.6349
butyrylcarnitine	0.6598	0.619
N-acetylphenylalanine	0.5955	0.4866
X - 11787	0.5853	0.3419
succinimide	0.5634	0.5959
N-acetylglutamine	0.5513	0.5465
N-acetyl-2-aminooctanoate*	0.5347	0.4026
glycocholenate sulfate*	0.524	0.3153
X - 13431	0.5091	0.4072
X - 23756	0.4963	0.3537
hexadecenedioate (C16:1-DC)*	0.4693	0.3499
N-delta-acetylornithine	0.4641	0.3965
X - 21467	0.4498	0.2155
octadecenedioate (C18:1-DC)*	0.4426	0.2891
1-stearoyl-2-arachidonoyl-GPC (18:0/20:4)	0.4337	0.2715
1-margaroyl-2-arachidonoyl-GPC (17:0/20:4)*	0.4289	0.2657
2-aminooctanoate	0.4246	0.4171
hexadecanedioate	0.4203	0.3201
tetradecanedioate	0.4159	0.2896
N-acetylarginine	0.4112	0.3023
X - 11308	0.3864	0.1224
glycodeoxycholate sulfate	0.3818	0.2595
orotate	0.3793	0.2487
N-acetylhistidine	0.3779	0.311
X - 16935	0.3772	0.175
imidazole lactate	0.3766	0.2263
methionine sulfone	0.3616	0.2744
1-arachidonoyl-GPC (20:4n6)*	0.3588	0.1851
taurocholenate sulfate	0.3492	0.1418
urate	0.3474	0.1855
X - 17654	0.3452	0.1661
cis-4-decenoate (10:1n6)*	0.3449	0.1685
1-pentadecanoyl-2-arachidonoyl-GPC (15:0/20:4)*	0.3335	0.1835
1-stearoyl-2-adrenoyl-GPC (18:0/22:4)*	0.3164	0.0625
hexanoylcarnitine	0.3063	0.2031
X - 11442	0.3032	0.3015
cis-4-decenoyl carnitine	0.3021	0.1679
16a-hydroxy DHEA 3-sulfate	0.3012	0.1688
androsterone sulfate	0.3005	0.2105
1-arachidonoyl-GPE (20:4n6)*	0.2955	0.1118
hydroxy-CMPF*	0.2954	0.0745
X - 17653	0.2946	0.1234
1,5-anhydroglucitol (1,5-AG)	0.2887	0.0829
N-trimethyl 5-aminovalerate	0.2887	0.1153
1-palmitoyl-2-arachidonoyl-GPC (16:0/20:4n6)	0.2866	0.193
decadienedioic acid (C10:2-DC)**	0.2861	0.2202
5-hydroxylysine	0.2794	0.1392
epiandrosterone sulfate	0.2775	0.1715
isovalerylcarnitine	0.2748	0.1284
N-palmitoyl-sphingosine (d18:1/16:0)	0.2746	0.0605
sphingomyelin (d18:1/15:0, d16:1/17:0)*	0.274	0.0773
1-stearoyl-2-dihomo-linolenoyl-GPI (18:0/20:3n3 or 6)*	0.2735	0.1823
X - 24309	0.2701	0.2701
glycosyl-N-palmitoyl-sphingosine (d18:1/16:0)	0.2698	0.0795
X - 11441	0.2695	0.2771
octanoylcarnitine	0.2683	0.1692
deoxycholic acid glucuronide	0.2665	0.1501
caproate (6:0)	0.262	0.0723
1-(1-enyl-stearoyl)-2-docosahexaenoyl-GPE (P-18:0/22:6)*	0.2616	0.0627
X - 11880	0.2614	0.0959
1-palmityl-2-stearoyl-GPC (O-16:0/18:0)*	0.2581	0.0757
1-(1-enyl-stearoyl)-2-docosahexaenoyl-GPC (P-18:0/22:6)*	0.2576	0.0613
N-acetylcarnosine	0.2572	0.0796
sphingomyelin (d18:1/17:0, d17:1/18:0, d19:1/16:0)	0.2565	0.0591
X - 21383	0.2522	0.0594
1-adrenoyl-GPC (22:4)*	0.2517	0.0646
sphingomyelin (d18:2/16:0, d18:1/16:1)*	0.2492	0.058
glycosyl-N-stearoyl-sphingosine (d18:1/18:0)	0.2474	0.0655
andro steroid monosulfate (1)*	0.244	0.1331
dimethylglycine	0.2439	0.1141
4-androsten-3alpha,17alpha-diol monosulfate (3)	0.2416	0.1177
N-stearoyl-sphingosine (d18:1/18:0)*	0.2416	0.0587
oleoyl-arachidonoyl-glycerol (18:1/20:4) [2]*	0.2411	0.1006
X - 11372	0.24	0.0699
X - 18921	0.2394	0.1356
1-palmitoleoyl-GPE (16:1)*	0.2362	0.0682
2-arachidonoyl-GPC (20:4)*	0.2352	0.1347
1-margaroyl-2-docosahexaenoyl-GPC (17:0/22:6)*	0.2346	0.0743
X - 24870	0.2336	0.0708
sphingomyelin (d18:1/14:0, d16:1/16:0)*	0.226	0.1029
homostachydrine*	0.2259	0.1104
sphingomyelin (d18:1/22:1, d18:2/22:0, d16:1/24:1)*	0.2236	0.0628
N-acetyltaurine	0.223	0.0613
arachidonate (20:4n6)	0.2221	0.0908
X - 23680	0.2219	0.0614
1-stearoyl-2-docosahexaenoyl-GPC (18:0/22:6)	0.2217	0.061
N-acetylputrescine	0.2202	0.1187
5-acetylamino-6-formylamino-3-methyluracil	0.2201	0.2698
4-androsten-3beta,17beta-diol monosulfate (1)	0.2201	0.066
4-androsten-3beta,17beta-diol monosulfate (2)	0.2194	0.0839
X - 21410	0.2183	0.0716
creatine	0.2177	0.0605
1-pentadecanoyl-2-docosahexaenoyl-GPC (15:0/22:6)*	0.2172	0.0591
1-linoleoyl-2-docosahexaenoyl-GPC (18:2/22:6)*	0.2164	0.0646
thymol sulfate	0.2163	0.0714
3-(4-hydroxyphenyl)lactate	0.2151	0.0635
1-palmitoleoyl-GPC (16:1)*	0.2135	0.0623
4-hydroxychlorothalonil	0.2131	0.0899
1-stearoyl-2-dihomo-linolenoyl-GPC (18:0/20:3n3 or 6)*	0.2125	0.0584
palmitoyl sphingomyelin (d18:1/16:0)	0.2123	0.0606
taurolithocholate 3-sulfate	0.2095	0.0592
homoarginine	0.2088	0.1567
1-palmityl-2-palmitoyl-GPC (O-16:0/16:0)*	0.2076	0.0694
3-carboxy-4-methyl-5-propyl-2-furanpropanoate (CMPF)	0.2063	0.0603
pregn steroid monosulfate*	0.2062	0.0568
1-palmitoyl-2-palmitoleoyl-GPC (16:0/16:1)*	0.2059	0.0669
1-(1-enyl-palmitoyl)-2-docosahexaenoyl-GPC (P-16:0/22:6)*	0.205	0.062
C-glycosyltryptophan	0.2048	0.0582
1-stearoyl-2-arachidonoyl-GPE (18:0/20:4)	0.2041	0.0643
1-dihomo-linolenoyl-GPC (20:3n3 or 6)*	0.2031	0.0676
X - 14939	0.2012	0.0878
3-phenylpropionate (hydrocinnamate)	0.2009	0.0622
pregnenolone sulfate	0.1999	0.0704
X - 21258	0.1998	0.0734
X - 24747	0.1995	0.1737
1-(1-enyl-oleoyl)-GPC (P-18:1)*	0.1993	0.0626
1-(1-enyl-oleoyl)-2-docosahexaenoyl-GPE (P-18:1/22:6)*	0.1981	0.064
dehydroisoandrosterone sulfate (DHEA-S)	0.1979	0.0705
X - 21319	0.1969	0.0625
3-aminoisobutyrate	0.1968	0.0956
N2,N2-dimethylguanosine	0.1965	0.0701
X - 24513	0.1962	0.0604
tiglylcarnitine	0.1958	0.0666
stearoylcarnitine	0.1954	0.0795
pregnen-diol disulfate*	0.1944	0.0689
1-arachidoyl-2-arachidonoyl-GPC (20:0/20:4)*	0.1935	0.0878
1-(1-enyl-stearoyl)-2-oleoyl-GPC (P-18:0/18:1)	0.1927	0.0594
sarcosine	0.1926	0.0661
1,3,7-trimethylurate	0.1915	0.063
5,6-dihydrouridine	0.1912	0.0645
sphingomyelin (d18:1/18:1, d18:2/18:0)	0.1897	0.058
tricosanoyl sphingomyelin (d18:1/23:0)*	0.1886	0.0554
4-androsten-3beta,17beta-diol disulfate (1)	0.188	0.0586
21-hydroxypregnenolone disulfate	0.187	0.0761
sphingomyelin (d18:1/20:0, d16:1/22:0)*	0.1843	0.0723
behenoyl sphingomyelin (d18:1/22:0)*	0.1837	0.0514
erythronate*	0.1831	0.0619
orotidine	0.1812	0.0657
X - 23749	0.1801	0.0694
3-hydroxy-5-cholestenoic acid	0.1799	0.0765
N-acetylglycine	0.1798	0.0774
11beta-hydroxyandrosterone glucuronide	0.1797	0.0782
1-palmitoyl-2-docosahexaenoyl-GPC (16:0/22:6)	0.1796	0.0603
5alpha-androstan-3beta,17beta-diol monosulfate (2)	0.1795	0.0872
X - 11381	0.179	0.0649
1-margaroyl-GPC (17:0)	0.1784	0.0642
1-nonadecanoyl-GPC (19:0)	0.1784	0.0689
2-hydroxyoctanoate	0.1779	0.1115
1-(1-enyl-palmitoyl)-2-docosahexaenoyl-GPE (P-16:0/22:6)*	0.1774	0.0605
N-palmitoylglycine	0.1765	0.1257
phosphatidylcholine (18:0/20:2, 20:0/18:2, 18:1/20:1)*	0.1764	0.0902
dihomo-linolenate (20:3n3 or n6)	0.1751	0.0612
X - 17690	0.175	0.0707
5alpha-androstan-3alpha,17beta-diol monosulfate (1)	0.1742	0.1291
1-(1-enyl-stearoyl)-2-arachidonoyl-GPC (P-18:0/20:4)	0.1722	0.1323
X - 11795	0.172	0.0624
1-(1-enyl-palmitoyl)-2-oleoyl-GPC (P-16:0/18:1)*	0.1719	0.0602
sphingomyelin (d18:1/21:0, d17:1/22:0, d16:1/23:0)*	0.1719	0.0712
1-palmityl-2-arachidonoyl-GPC (O-16:0/20:4)*	0.1713	0.1155
5alpha-pregnan-3beta,20alpha-diol monosulfate (2)	0.171	0.0559
1-docosahexaenoyl-GPC (22:6)*	0.1692	0.0635
acetylcarnitine	0.168	0.0702
urea	0.1673	0.0561
homocitrulline	0.1666	0.0669
gamma-glutamylvaline	0.1662	0.0591
1-stearoyl-2-docosapentaenoyl-GPC (18:0/22:5n3)*	0.1661	0.059
caffeine	0.166	0.0557
1-lignoceroyl-GPC (24:0)	0.1651	0.0632
1,3-dimethylurate	0.1648	0.0599
1-palmitoyl-2-arachidonoyl-GPI (16:0/20:4)*	0.1634	0.0613
X - 11315	0.1634	0.0671
isoursodeoxycholate	0.1629	0.0541
palmitoylcarnitine	0.1628	0.0755
1-dihomo-linoleoyl-GPC (20:2)*	0.1628	0.0657
sphingomyelin (d18:2/23:0, d18:1/23:1, d17:1/24:1)*	0.1626	0.0578
X - 24699	0.1626	0.0672
1-stearoyl-2-docosapentaenoyl-GPC (18:0/22:5n6)*	0.1616	0.0538
eicosanodioate	0.1615	0.0656
4-androsten-3beta,17beta-diol disulfate (2)	0.1615	0.0603
glycochenodeoxycholate sulfate	0.1608	0.0716
decanoylcarnitine	0.1607	0.1082
arachidonoylcholine	0.1606	0.0635
serine	0.1603	0.0613
succinylcarnitine	0.16	0.0837
X - 11261	0.1594	0.0545
palmitoyl-arachidonoyl-glycerol (16:0/20:4) [2]*	0.1593	0.0755
beta-citrylglutamate	0.1591	0.1075
3-methoxycatechol sulfate (1)	0.1588	0.0561
tryptophan betaine	0.1578	0.1243
1-(1-enyl-palmitoyl)-2-myristoyl-GPC (P-16:0/14:0)*	0.1574	0.059
aconitate [cis or trans]	0.1568	0.0639
N-acetylglucosamine/N-acetylgalactosamine	0.1561	0.0766
stearidonate (18:4n3)	0.1559	0.0657
kynurenine	0.1555	0.066
1-stearoyl-2-arachidonoyl-GPI (18:0/20:4)	0.1555	0.0849
5alpha-pregnan-3beta,20alpha-diol disulfate	0.1537	0.0636
glutamine conjugate of C6H10O2 (2)*	0.1537	0.0766
X - 11444	0.1531	0.1031
10-undecenoate (11:1n1)	0.1526	0.1363
linoleoyl ethanolamide	0.1526	0.1281
1-palmitoyl-2-arachidonoyl-GPE (16:0/20:4)*	0.1522	0.0591
2,6-dihydroxybenzoic acid	0.1516	0.0519
X - 21358	0.1508	0.056
1-docosapentaenoyl-GPC (22:5n3)*	0.1504	0.0668
3-methoxytyrosine	0.1499	0.0577
propionylcarnitine	0.1495	0.0718
2,3-dihydroxy-5-methylthio-4-pentenoate (DMTPA)*	0.149	0.0557
ergothioneine	0.1481	0.0708
lactosyl-N-palmitoyl-sphingosine (d18:1/16:0)	0.1477	0.0658
palmitoyl-sphingosine-phosphoethanolamine (d18:1/16:0)	0.1475	0.0598
1-(1-enyl-stearoyl)-GPC (P-18:0) *	0.1468	0.0707
ascorbic acid 3-sulfate*	0.1468	0.0538
N-acetylthreonine	0.1467	0.0575
phosphatidylcholine (15:0/18:1, 17:0/16:1)*	0.1467	0.0709
stearoyl sphingomyelin (d18:1/18:0)	0.1463	0.0558
1-(1-enyl-palmitoyl)-2-palmitoyl-GPC (P-16:0/16:0)*	0.1459	0.0752
tryptophan	0.1456	0.0638
oleoyl-linoleoyl-glycerol (18:1/18:2) [1]	0.1455	0.0683
p-cresol sulfate	0.1453	0.0536
O-sulfo-L-tyrosine	0.1426	0.063
X - 15486	0.1425	0.0633
alpha-tocopherol	0.1423	0.0545
oleoyl-oleoyl-glycerol (18:1/18:1) [2]*	0.1423	0.0592
glycolithocholate sulfate*	0.141	0.0731
cholate	0.1404	0.0554
4-hydroxyhippurate	0.1401	0.0567
oleoyl-oleoyl-glycerol (18:1/18:1) [1]*	0.1399	0.0632
X - 21658	0.139	0.0614
2-hydroxypalmitate	0.1389	0.053
gamma-tocopherol/beta-tocopherol	0.1386	0.0638
oleoyl ethanolamide	0.1382	0.1336
sphingomyelin (d18:2/14:0, d18:1/14:1)*	0.1382	0.0565
cystine	0.1381	0.0534
1-oleoyl-GPC (18:1)	0.138	0.0601
trans-4-hydroxyproline	0.1379	0.0519
1-palmitoyl-2-oleoyl-GPC (16:0/18:1)	0.1374	0.0543
dopamine sulfate (2)	0.137	0.0643
1-(1-enyl-palmitoyl)-2-arachidonoyl-GPC (P-16:0/20:4)*	0.1367	0.1456
palmitoyl-oleoyl-glycerol (16:0/18:1) [2]*	0.1361	0.0652
docosapentaenoate (n3 DPA; 22:5n3)	0.1358	0.0627
X - 12101	0.1357	0.0867
1-(1-enyl-stearoyl)-2-linoleoyl-GPC (P-18:0/18:2)*	0.1348	0.0602
1-palmitoyl-2-oleoyl-GPI (16:0/18:1)*	0.1348	0.0702
alanine	0.1343	0.0572
vanillylmandelate (VMA)	0.1342	0.0553
X - 24748	0.1342	0.0654
tyrosine	0.1339	0.0593
4-acetamidobutanoate	0.1337	0.0677
lithocholate sulfate (1)	0.1307	0.0761
1-(1-enyl-palmitoyl)-2-linoleoyl-GPC (P-16:0/18:2)*	0.1305	0.0592
X - 16944	0.1301	0.0533
quinolinate	0.1299	0.0609
X - 18913	0.1299	0.0661
oleoyl-linoleoyl-glycerol (18:1/18:2) [2]	0.1284	0.0673
X - 11483	0.1283	0.0511
1-palmityl-2-oleoyl-GPC (O-16:0/18:1)*	0.1281	0.0565
N-methylpipecolate	0.1279	0.0766
9-hydroxystearate	0.127	0.058
1-palmitoyl-2-stearoyl-GPC (16:0/18:0)	0.1264	0.0648
5alpha-androstan-3beta,17beta-diol disulfate	0.1256	0.0816
1-pentadecanoyl-GPC (15:0)*	0.125	0.0569
phosphatidylcholine (16:0/22:5n3, 18:1/20:4)*	0.125	0.0899
isobutyrylcarnitine	0.1248	0.0584
gamma-glutamylglutamate	0.1245	0.0589
16-hydroxypalmitate	0.1243	0.0636
X - 23765	0.1243	0.0575
1-arachidoyl-GPC (20:0)	0.1242	0.0652
4-methyl-2-oxopentanoate	0.1237	0.0559
X - 11478	0.1237	0.0521
glutarate (pentanedioate)	0.123	0.0639
1-(1-enyl-stearoyl)-GPE (P-18:0)*	0.1226	0.0637
X - 23639	0.1223	0.0571
N-formylmethionine	0.122	0.0597
cholesterol	0.1216	0.0526
trigonelline (N'-methylnicotinate)	0.1216	0.0649
1-stearyl-GPC (O-18:0)*	0.1214	0.0586
5alpha-pregnan-3beta,20beta-diol monosulfate (1)	0.1213	0.0712
glutamate	0.1211	0.0553
1-palmityl-GPC (O-16:0)	0.1204	0.0594
oxalate (ethanedioate)	0.1202	0.0552
1-(1-enyl-oleoyl)-GPE (P-18:1)*	0.119	0.0591
docosahexaenoate (DHA; 22:6n3)	0.1185	0.0584
palmitoyl-linoleoyl-glycerol (16:0/18:2) [1]*	0.1183	0.061
1-(1-enyl-palmitoyl)-2-palmitoleoyl-GPC (P-16:0/16:1)*	0.1178	0.0593
X - 19141	0.1176	0.1038
5-acetylamino-6-amino-3-methyluracil	0.1173	0.0945
2-arachidonoyl-GPE (20:4)*	0.1169	0.0655
1-docosahexaenoyl-GPE (22:6)*	0.1167	0.0629
4-guanidinobutanoate	0.1165	0.0961
undecenoylcarnitine (C11:1)	0.1162	0.0835
1-linoleoyl-GPC (18:2)	0.1156	0.0588
X - 21339	0.1154	0.0674
linoleoyl-linoleoyl-glycerol (18:2/18:2) [1]*	0.1147	0.0661
1-palmitoyl-2-linoleoyl-GPI (16:0/18:2)	0.1144	0.0647
sphingomyelin (d18:1/24:1, d18:2/24:0)*	0.1143	0.0506
linoleoyl-arachidonoyl-glycerol (18:2/20:4) [1]*	0.1142	0.0662
sulfate*	0.1134	0.0547
dihomo-linoleate (20:2n6)	0.1134	0.0588
1-stearoyl-2-linoleoyl-GPC (18:0/18:2)*	0.1131	0.0589
gamma-glutamyl-epsilon-lysine	0.113	0.0645
1-oleoyl-2-docosahexaenoyl-GPC (18:1/22:6)*	0.1121	0.063
N-acetylserine	0.1114	0.0532
X - 12100	0.1106	0.0672
1-arachidonoyl-GPI (20:4)*	0.1104	0.0638
deoxycholate	0.1104	0.068
3-hydroxyhexanoate	0.1102	0.0514
1-methylimidazoleacetate	0.11	0.0683
X - 23652	0.1097	0.0638
N-acetylalanine	0.1092	0.0545
deoxycarnitine	0.1088	0.072
guanidinoacetate	0.1085	0.0557
2-oxoarginine*	0.1083	0.0578
1,2-dipalmitoyl-GPC (16:0/16:0)	0.1069	0.0605
arabitol/xylitol	0.1068	0.049
kynurenate	0.1064	0.0607
methylsuccinate	0.1064	0.1221
1-(1-enyl-palmitoyl)-GPE (P-16:0)*	0.1063	0.0604
X - 13684	0.1062	0.0651
1-linoleoylglycerol (18:2)	0.1058	0.061
docosadienoate (22:2n6)	0.1057	0.06
3-methyl-2-oxobutyrate	0.1055	0.0504
valine	0.1054	0.0595
catechol sulfate	0.1048	0.0548
1-eicosenoyl-GPC (20:1)*	0.1045	0.0654
oleoylcarnitine	0.1044	0.0718
pregnenetriol disulfate*	0.1042	0.0636
palmitoleoyl-linoleoyl-glycerol (16:1/18:2) [1]*	0.1041	0.066
1-linoleoyl-GPE (18:2)*	0.1039	0.07
1-stearoyl-2-linoleoyl-GPI (18:0/18:2)	0.1038	0.0702
glutamine	0.1036	0.0568
gamma-glutamylleucine	0.1035	0.059
sphingomyelin (d18:2/24:1, d18:1/24:2)*	0.1028	0.0579
palmitoylcholine	0.1026	0.0544
1-methylxanthine	0.1018	0.096
pyrraline	0.1017	0.0632
1-methylhistidine	0.1013	0.0671
sphingomyelin (d18:1/20:1, d18:2/20:0)*	0.1013	0.0696
N1-methylinosine	0.1008	0.0624
pseudouridine	0.1006	0.0562
threonine	0.1004	0.0609
gamma-CEHC	0.0996	0.0628
leucine	0.0993	0.0577
cys-gly, oxidized	0.0985	0.0948
1-eicosapentaenoyl-GPE (20:5)*	0.0984	0.0678
paraxanthine	0.0983	0.0587
caprylate (8:0)	0.098	0.0635
tridecenedioate (C13:1-DC)*	0.0976	0.0523
1-stearoyl-GPE (18:0)	0.0975	0.0618
1-methylnicotinamide	0.0969	0.0635
1-palmitoyl-2-oleoyl-GPE (16:0/18:1)	0.0966	0.0541
fructose	0.0964	0.0485
linoleoyl-arachidonoyl-glycerol (18:2/20:4) [2]*	0.0964	0.0818
cinnamoylglycine	0.0963	0.0625
palmitoleoylcarnitine*	0.0963	0.0665
thyroxine	0.0956	0.0668
glycine	0.0955	0.0952
2-hydroxybutyrate/2-hydroxyisobutyrate	0.0953	0.0589
indolelactate	0.095	0.056
isoleucylleucine/leucylisoleucine	0.0947	0.0726
palmitoyl-linoleoyl-glycerol (16:0/18:2) [2]*	0.0946	0.061
1-stearoyl-2-docosahexaenoyl-GPE (18:0/22:6)*	0.0945	0.0614
1-linolenoyl-GPC (18:3)*	0.0944	0.0548
gamma-glutamylisoleucine*	0.0942	0.0572
1-(1-enyl-palmitoyl)-GPC (P-16:0)*	0.0941	0.0654
p-cresol-glucuronide*	0.094	0.0596
2-methylbutyrylcarnitine (C5)	0.0934	0.0685
1-stearoyl-GPC (18:0)	0.0933	0.0669
gamma-glutamyltyrosine	0.0932	0.0606
creatinine	0.0927	0.0547
X - 11470	0.0924	0.0873
gentisate	0.0919	0.0632
1,2,3-benzenetriol sulfate (2)	0.0913	0.0611
N4-acetylcytidine	0.0911	0.0758
1-eicosapentaenoyl-GPC (20:5)*	0.091	0.083
X - 12844	0.0909	0.0578
cortolone glucuronide (1)	0.0909	0.0632
arachidate (20:0)	0.0906	0.0537
X - 11850	0.0903	0.0547
S-methylcysteine	0.0891	0.0788
hydantoin-5-propionic acid	0.0884	0.0726
galactonate	0.0883	0.0604
fumarate	0.0881	0.0542
N1-methyladenosine	0.0878	0.0545
X - 11299	0.0877	0.0557
X - 17325	0.0877	0.0633
cortisol	0.0876	0.0516
choline	0.0873	0.0519
docosapentaenoate (n6 DPA; 22:5n6)	0.0872	0.0623
7-methylguanine	0.087	0.0531
glutamine conjugate of C7H12O2*	0.087	0.0808
arabonate/xylonate	0.0869	0.0599
X - 18899	0.0869	0.065
1-myristoyl-2-arachidonoyl-GPC (14:0/20:4)*	0.0863	0.0654
palmitate (16:0)	0.0862	0.0616
citrate	0.0859	0.0568
2-aminoheptanoate	0.0855	0.0581
pro-hydroxy-pro	0.0855	0.0556
arginine	0.0853	0.0544
hippurate	0.0852	0.0544
1-palmitoyl-2-linoleoyl-GPE (16:0/18:2)	0.0843	0.1124
1-myristoyl-2-docosahexaenoyl-GPC (14:0/22:6)*	0.0842	0.0591
5-bromotryptophan	0.0841	0.0612
X - 24243	0.0841	0.058
betaine	0.084	0.0678
3-methyl-2-oxovalerate	0.0835	0.0535
1-stearoyl-2-oleoyl-GPE (18:0/18:1)	0.0828	0.0535
linoleate (18:2n6)	0.0825	0.0616
stachydrine	0.0822	0.0601
X - 13835	0.0821	0.0647
phenyllactate (PLA)	0.082	0.0526
ribitol	0.0816	0.0662
stearate (18:0)	0.0807	0.0573
nonadecanoate (19:0)	0.0803	0.0555
eicosapentaenoate (EPA; 20:5n3)	0.0791	0.0656
adrenate (22:4n6)	0.0785	0.0657
branched-chain, straight-chain, or cyclopropyl 10:1 fatty acid (1)*	0.0785	0.0678
sulfate of piperine metabolite C16H19NO3 (3)*	0.0781	0.0688
hexadecadienoate (16:2n6)	0.078	0.0616
X - 12680	0.0778	0.0562
indoleacetate	0.0773	0.0523
X - 24020	0.0771	0.0613
sphingosine 1-phosphate	0.0767	0.0671
5,6-dihydrothymine	0.0766	0.0576
sulfate of piperine metabolite C16H19NO3 (2)*	0.0765	0.062
3-formylindole	0.0764	0.056
O-methylcatechol sulfate	0.0759	0.0536
quinate	0.0753	0.0612
X - 23644	0.0753	0.0603
1-palmitoyl-2-linoleoyl-GPC (16:0/18:2)	0.0752	0.0573
3-methyl catechol sulfate (1)	0.0748	0.0573
phenylalanine	0.0738	0.0551
benzoate	0.0735	0.0598
glycerophosphoethanolamine	0.0735	0.065
eicosenoate (20:1)	0.0734	0.0585
6-hydroxyindole sulfate	0.0733	0.0557
sphinganine-1-phosphate	0.0733	0.0626
branched chain 14:0 dicarboxylic acid**	0.0732	0.0642
linoleoylcarnitine*	0.073	0.0769
theophylline	0.0721	0.0512
palmitoleate (16:1n7)	0.0719	0.0599
1-(1-enyl-stearoyl)-2-linoleoyl-GPE (P-18:0/18:2)*	0.0717	0.052
carnitine	0.0715	0.0785
retinol (Vitamin A)	0.0713	0.0569
threonate	0.0711	0.0517
X - 23997	0.0711	0.0537
xanthine	0.0706	0.0531
1-myristoyl-2-palmitoyl-GPC (14:0/16:0)	0.0705	0.0614
1-myristoyl-2-linoleoyl-GPC (14:0/18:2)*	0.0703	0.0613
margarate (17:0)	0.0702	0.0561
androsterone glucuronide	0.07	0.0639
1-palmitoyl-GPE (16:0)	0.0699	0.0474
1-(1-enyl-palmitoyl)-2-linoleoyl-GPE (P-16:0/18:2)*	0.0697	0.0503
N-acetyl-beta-alanine	0.0696	0.06
X - 21364	0.0696	0.0543
pyridoxate	0.0694	0.0576
oleoylcholine	0.0693	0.0548
allantoin	0.0692	0.0584
X - 24813	0.069	0.0582
1,7-dimethylurate	0.0688	0.0602
palmitoyl dihydrosphingomyelin (d18:0/16:0)*	0.0688	0.0541
sphinganine	0.0687	0.0614
1-linoleoyl-GPI (18:2)*	0.0685	0.0518
dodecadienoate (12:2)*	0.0685	0.061
erucate (22:1n9)	0.0682	0.0538
phenylpyruvate	0.0679	0.0583
glycochenodeoxycholate	0.0679	0.0578
gamma-glutamylphenylalanine	0.0677	0.0553
5alpha-androstan-3beta,17alpha-diol disulfate	0.0676	0.0651
pyroglutamine*	0.0673	0.0586
gamma-glutamylthreonine	0.0671	0.0541
phenylacetylglutamine	0.0666	0.0529
7-alpha-hydroxy-3-oxo-4-cholestenoate (7-Hoca)	0.0664	0.0499
3-methylhistidine	0.066	0.056
10-heptadecenoate (17:1n7)	0.0657	0.0604
glycocholate	0.0653	0.0585
serotonin	0.0653	0.055
nicotinamide	0.0652	0.0576
2-hydroxyglutarate	0.0644	0.057
4-ethylcatechol sulfate	0.0643	0.0572
alpha-ketobutyrate	0.0642	0.0648
4-methylcatechol sulfate	0.0637	0.0577
1-linoleoyl-2-linolenoyl-GPC (18:2/18:3)*	0.0636	0.0601
3-hydroxybutyrate (BHBA)	0.0631	0.0671
tetradecadienoate (14:2)*	0.063	0.0622
linolenate [alpha or gamma; (18:3n3 or 6)]	0.0625	0.0605
myristoylcarnitine	0.0616	0.0779
dimethylarginine (SDMA + ADMA)	0.0616	0.0744
X - 24452	0.0615	0.0551
1-palmitoyl-2-docosahexaenoyl-GPE (16:0/22:6)*	0.061	0.0584
methyl indole-3-acetate	0.0608	0.0649
piperine	0.0604	0.0495
phenylalanyltryptophan	0.0603	0.0545
cytidine	0.0601	0.0671
1-(1-enyl-stearoyl)-2-arachidonoyl-GPE (P-18:0/20:4)*	0.0601	0.0611
N-palmitoyl-sphinganine (d18:0/16:0)	0.0601	0.055
1-oleoyl-GPE (18:1)	0.0596	0.0533
1-palmitoyl-2-eicosapentaenoyl-GPC (16:0/20:5)*	0.0591	0.0829
X - 24295	0.0591	0.0567
histidine	0.0587	0.0517
N-acetylneuraminate	0.0584	0.0526
alpha-hydroxyisovalerate	0.0582	0.0593
pregnanediol-3-glucuronide	0.0576	0.0662
1,2-dilinoleoyl-GPC (18:2/18:2)	0.0575	0.0615
1-dihomo-linolenoyl-GPE (20:3n3 or 6)*	0.0573	0.0773
N1-Methyl-2-pyridone-5-carboxamide	0.0567	0.0601
gamma-glutamylglutamine	0.0566	0.0592
glucuronate	0.0562	0.056
glucuronide of piperine metabolite C17H21NO3 (4)*	0.0561	0.0574
indolepropionate	0.0556	0.0624
X - 24806	0.0556	0.0489
N-acetylmethionine	0.0555	0.0539
X - 16580	0.0551	0.0528
X - 22162	0.055	0.1073
beta-hydroxyisovalerate	0.0548	0.0584
malate	0.0547	0.0566
etiocholanolone glucuronide	0.0547	0.0677
3-carboxy-4-methyl-5-pentyl-2-furanpropionate (3-CMPFP)**	0.0547	0.0746
xanthurenate	0.0546	0.0822
X - 16964	0.0544	0.0521
1-stearoyl-2-linoleoyl-GPE (18:0/18:2)*	0.0542	0.0694
17-methylstearate	0.0535	0.0562
1-myristoyl-GPC (14:0)	0.0533	0.0556
3-indoxyl sulfate	0.0524	0.0554
N6,N6,N6-trimethyllysine	0.0521	0.0526
methionine	0.052	0.0505
ursodeoxycholate	0.0516	0.0647
gamma-glutamylglycine	0.0514	0.0714
N,N-dimethylalanine	0.0507	0.071
2-aminobutyrate	0.0506	0.055
3-hydroxyisobutyrate	0.0506	0.0496
1-stearoyl-2-oleoyl-GPC (18:0/18:1)	0.0504	0.0553
1-palmitoyl-GPC (16:0)	0.0503	0.0601
N-acetylaspartate (NAA)	0.0499	0.057
3-hydroxypyridine sulfate	0.0497	0.0559
isoleucine	0.0493	0.06
X - 24431	0.0492	0.0579
methionine sulfoxide	0.0491	0.0627
2,3-dihydroxyisovalerate	0.0488	0.0475
adenine	0.0487	0.0844
lactate	0.0476	0.0485
myristoleate (14:1n5)	0.0474	0.0604
1-methyl-5-imidazoleacetate	0.0471	0.0606
X - 15469	0.0466	0.0595
oleate/vaccenate (18:1)	0.0464	0.0612
1-carboxyethylphenylalanine	0.0462	0.0532
3-hydroxy-2-ethylpropionate	0.0459	0.0501
X - 22771	0.0459	0.0528
erythritol	0.0458	0.0557
alpha-hydroxyisocaproate	0.0458	0.0495
15-methylpalmitate	0.0446	0.0554
citrulline	0.0445	0.057
X - 17676	0.0443	0.0606
maleate	0.0442	0.0541
X - 24027	0.0437	0.0572
X - 15492	0.0435	0.0591
laurate (12:0)	0.043	0.0525
gluconate	0.0428	0.0608
X - 23782	0.0426	0.0558
X - 12524	0.0425	0.0534
X - 24831	0.0424	0.0546
tartronate (hydroxymalonate)	0.0415	0.058
phenol sulfate	0.041	0.0554
5-dodecenoylcarnitine (C12:1)	0.041	0.0642
cortisone	0.0408	0.0597
myo-inositol	0.0402	0.056
X - 13866	0.0401	0.0589
1-(1-enyl-palmitoyl)-2-oleoyl-GPE (P-16:0/18:1)*	0.0397	0.0525
glycerol	0.0396	0.0557
diacylglycerol (16:1/18:2 [2], 16:0/18:3 [1])*	0.0394	0.064
taurochenodeoxycholate	0.0388	0.0725
1-oleoyl-GPI (18:1)*	0.0387	0.0527
1-palmitoyl-GPI (16:0)	0.0377	0.0615
1-palmitoyl-2-eicosapentaenoyl-GPE (16:0/20:5)*	0.0376	0.059
ethyl alpha-glucopyranoside	0.0365	0.0613
methyl glucopyranoside (alpha + beta)	0.0362	0.0646
10-nonadecenoate (19:1n9)	0.0351	0.0563
myristate (14:0)	0.0339	0.0581
2-hydroxyhippurate (salicylurate)	0.0337	0.0547
dodecanedioate	0.0327	0.0691
4-hydroxy-2-oxoglutaric acid	0.0327	0.0505
X - 24804	0.0324	0.0501
methyl-4-hydroxybenzoate sulfate	0.0308	0.0577
glycoursodeoxycholate	0.0304	0.0546
X - 12216	0.0296	0.054
2-myristoyl-GPC (14:0)*	0.0293	0.066
myristoleoylcarnitine*	0.0288	0.0679
phosphate	0.0279	0.0514
2-hydroxystearate	0.0276	0.0556
X - 21353	0.0275	0.0566
gamma-glutamyl-alpha-lysine	0.0267	0.0607
X - 23636	0.0267	0.0531
X - 12007	0.0251	0.0556
laurylcarnitine	0.0247	0.0668
1-(1-enyl-stearoyl)-2-oleoyl-GPE (P-18:0/18:1)	0.0243	0.0525
trimethylamine N-oxide	0.024	0.0537
cysteinylglycine	0.0239	0.0544
salicylate	0.0239	0.0515
thioproline	0.0235	0.0574
X - 19438	0.0229	0.0527
pipecolate	0.0209	0.0597
4-ethylphenylsulfate	0.0205	0.0529
5-dodecenoate (12:1n7)	0.0201	0.06
ornithine	0.0192	0.0577
alpha-ketoglutarate	0.0187	0.0538
13-HODE + 9-HODE	0.0181	0.0494
sphingosine	0.018	0.0622
2-linoleoyl-GPC (18:2)*	0.0174	0.0544
4-androsten-3alpha,17alpha-diol monosulfate (2)	0.0168	0.06
X - 22775	0.0166	0.0621
iminodiacetate (IDA)	0.0164	0.0566
2-stearoyl-GPE (18:0)*	0.0163	0.0492
N-acetylglutamate	0.0162	0.0578
aspartate	0.0146	0.0586
3-hydroxy-3-methylglutarate	0.0145	0.0601
glycerate	0.0143	0.0502
(S)-a-amino-omega-caprolactam	0.0134	0.0623
X - 17335	0.0124	0.0602
phosphatidylcholine (14:0/14:0, 16:0/12:0)	0.0119	0.0541
uridine	0.0117	0.055
picolinoylglycine	0.0111	0.0642
2-hydroxydecanoate	0.0109	0.0503
2-linoleoyl-GPE (18:2)*	0.0099	0.0599
2-palmitoyl-GPC (16:0)*	0.0092	0.0481
X - 21736	0.0092	0.0547
1-palmityl-2-linoleoyl-GPC (O-16:0/18:2)*	0.0085	0.0533
asparagine	0.0079	0.0783
cysteine	0.0077	0.0537
cysteine s-sulfate	0.0072	0.0545
pantothenate	0.0071	0.06
gamma-glutamylcitrulline*	0.0063	0.0573
X - 12849	0.0062	0.0549
caprate (10:0)	0.0059	0.0551
docosadioate	0.0054	0.0594
7-methylxanthine	0.0051	0.0538
gamma-glutamylmethionine	0.0045	0.0497
X - 15666	0.0025	0.0528
N-acetyl-isoputreanine*	0.0019	0.0631
lysine	0.0015	0.0564
X - 23593	0.0007	0.0535
proline	0	0.0798
N6-acetyllysine	0	0.0528
5-oxoproline	0	0.0589
ribonate	0	0.0559
mannose	0	0.0653
3-hydroxydecanoate	0	0.0601
3-methylxanthine	0	0.0496
2-hydroxy-3-methylvalerate	0	0.058
4-hydroxyphenylpyruvate	0	0.0623
3-hydroxyoctanoate	0	0.0647
N-methylproline	0	0.0547
S-1-pyrroline-5-carboxylate	0	0.0578
uracil	0	0.0569
2-aminoadipate	0	0.0627
3-hydroxylaurate	0	0.0515
spermidine	0	0.0609
1-(1-enyl-palmitoyl)-2-arachidonoyl-GPE (P-16:0/20:4)*	0	0.0513
12,13-DiHOME	0	0.0593
1-stearoyl-GPI (18:0)	0	0.0607
2-aminophenol sulfate	0	0.0559
2-docosahexaenoyl-GPC (22:6)*	0	0.0602
2-oleoyl-GPC (18:1)*	0	0.0451
2-oleoyl-GPE (18:1)*	0	0.0534
2-palmitoyl-GPE (16:0)*	0	0.0463
3-hydroxyhippurate	0	0.0574
3-phosphoglycerate	0	0.0562
3-ureidopropionate	0	0.0588
4-allylphenol sulfate	0	0.0549
4-vinylphenol sulfate	0	0.0496
5-methyluridine (ribothymidine)	0	0.049
adenosine 5'-monophosphate (AMP)	0	0.0535
azelate (nonanedioate)	0	0.0587
choline phosphate	0	0.0525
cyclo(pro-val)	0	0.0581
cysteine-glutathione disulfide	0	0.07
EDTA	0	0.0505
gamma-glutamylhistidine	0	0.0526
glucose	0	0.0487
glycerophosphorylcholine (GPC)	0	0.0562
gulonate*	0	0.0615
hypotaurine	0	0.053
hypoxanthine	0	0.0586
maltose	0	0.0551
mannitol/sorbitol	0	0.048
N-(2-furoyl)glycine	0	0.0636
phosphoethanolamine	0	0.0515
pyruvate	0	0.0486
succinate	0	0.0488
taurine	0	0.0517
taurocholate	0	0.0706
theobromine	0	0.0505
1-ribosyl-imidazoleacetate*	0	0.0517
4-allylcatechol sulfate	0	0.0517
X - 12462	0	0.0481
X - 12847	0	0.0673
X - 14056	0	0.0503
X - 14568	0	0.0561
X - 16938	0	0.0473
X - 17185	0	0.0578
X - 21286	0	0.0498
branched-chain, straight-chain, or cyclopropyl 12:1 fatty acid*	0	0.0594
ethyl beta-glucopyranoside	0	0.0599
X - 23637	0	0.0524
X - 23739	0	0.057
X - 24306	0	0.0566
X - 24307	0	0.0526
X - 24512	0	0.0577
X - 24738	0	0.07
X - 24765	0	0.0466
3-amino-2-piperidone	0	0.0546
X - 24803	0	0.052

## Sheet: Table S3
Region	Chr	Pos	SNP ID	Gene	Exonic Variant	Ref Allele	BETA	SE	P	Metabolite	Novel	OMIM entries associated with nearest gene
27	2	73788026	rs7604682	ALMS1		A	0.658075	0.0158335	8.63E-345	N-acetylphenylalanine		Alstrom syndrome, 203800 (3), Autosomal recessive
34	2	234668570	rs887829	UGT1A8		T	0.674675	0.0143047	5.97E-493	bilirubin (Z,Z)
137	14	74079209	rs55826256	ACOT6		C	-0.729054	0.0167556	5.75E-374	X - 24309
106	10	100148176	rs2147896	PYROXD2	missense_variant	G	-0.950412	0.0125691	4.51E-946	N-methylpipecolate
128	12	121176083	rs1799958	ACADS		A	0.887136	0.0140306	4.41E-717	butyrylcarnitine		Acyl-CoA dehydrogenase, short-chain, deficiency of, 201470 (3), Autosomal recessive
34	2	234664586	chr2:234664586	UGT1A8		A	0.622	0.014	4.38E-373	biliverdin
123	12	21347021	rs12367888	SLCO1B1		T	0.872	0.019	4.25E-412	glycochenodeoxycholate glucuronide (1)		Hyperbilirubinemia, Rotor type, digenic, 237450 (3), Digenic recessive
52	4	69375591	chr4:69375591	TMPRSS11E		<CN0>	-0.797	0.015	4.16E-528	deoxycholic acid glucuronide
113	11	61596633	rs99780	FADS2		T	-0.584551	0.0144788	4.07E-327	1-margaroyl-2-arachidonoyl-GPC (17:0/20:4)*
113	11	62844415	rs191081650	SLC22A24		A	1.064	0.025	4.04E-363	androsterone glucuronide
128	12	121180019	rs34708625	ACADS		C	1.00248	0.0132329	4.01E-962	ethylmalonate		Acyl-CoA dehydrogenase, short-chain, deficiency of, 201470 (3), Autosomal recessive
62	5	35039486	rs37370	AGXT2	missense_variant	C	0.955188	0.0222247	3.46E-366	3-aminoisobutyrate		Beta-aminoisobutyric acid, urinary excretion of, 210100 (3), Autosomal recessive
34	2	234668570	rs887829	UGT1A8		T	0.607859	0.0146609	2.27E-343	bilirubin (E,E)*
27	2	73751966	rs7567585	ALMS1		A	-0.875213	0.0151511	1.99E-616	N-delta-acetylornithine		Alstrom syndrome, 203800 (3), Autosomal recessive
27	2	73785358	rs6546847	ALMS1		G	0.819781	0.0156533	1.66E-512	N-acetylglutamine		Alstrom syndrome, 203800 (3), Autosomal recessive
91	8	18272438	rs4921914	NAT2		C	0.867861	0.0160407	1.53E-542	5-acetylamino-6-formylamino-3-methyluracil		Acetylation, slow, 243400 (3), Autosomal recessive
170	17	73127348	rs11541956	NT5C	missense_variant	A	-1.63852	0.0389936	1.27E-351	orotidine
86	7	99332948	rs45446698	CYP3A5		G	-1.40652	0.0330685	1.21E-359	androsterone sulfate		Hypertension, salt-sensitive essential, susceptibility to, 145500 (3), Multifactorial
27	2	73785358	rs6546847	ALMS1		G	0.870868	0.0153555	1.19E-587	N-acetylarginine		Alstrom syndrome, 203800 (3), Autosomal recessive
52	4	69373747	chr4:69373747	TMPRSS11E		<CN0>	-0.726	0.014	1.16E-505	X - 19141
77	6	131894358	rs17788484	ARG1	5_prime_UTR_variant	T	0.368	0.056	6.78e-11	ornithine		Argininemia, 207800 (3), Autosomal recessive
90	7	150536587	rs4725960	ABP1		T	0.116	0.018	6.73e-11	N-acetylputrescine
107	10	104487382	rs2902548	SFXN2		T	0.13	0.02	6.54e-11	dimethylglycine	Yes
75	6	111558006	rs12214933	SLC16A10		G	0.134	0.02	6.43e-11	tryptophan
31	2	211540507	rs1047891	CPS1	missense_variant	A	-0.109	0.017	6.29e-11	1-ribosyl-imidazoleacetate*		Carbamoylphosphate synthetase I deficiency, 237300 (3), Autosomal recessive; Pulmonary hypertension, neonatal, susceptibility to, 615371 (3); Venoocclusive disease after bone marrow transplantation (3)
138	14	77843920	rs61729313	SAMD15	synonymous_variant	G	-0.381	0.058	6.13e-11	arabitol/xylitol	Yes
183	19	45416741	rs438811	TOMM40		T	0.114	0.017	6.1e-11	oleoyl-oleoyl-glycerol (18:1/18:1) [2]*
106	10	102075479	rs603424	PKD2L1		A	0.128	0.02	6e-11	1-(1-enyl-stearoyl)-2-arachidonoyl-GPC (P-18:0/20:4)
184	19	49304215	rs4801776	BCAT2		T	-0.106	0.016	5.95e-11	valine		Hypervalinemia or hyperleucine-isoleucinemia (1)
118	11	124874739	rs75976132	CCDC15		G	0.202	0.031	5.71e-11	X - 21358
165	17	6619818	rs571046759	SLC13A5		C	0.097	0.015	5.71e-11	citrate		Epileptic encephalopathy, early infantile, 25, 615905 (3), Autosomal recessive
152	16	16103232	rs4781712	ABCC1		A	-0.097	0.015	5.38e-11	laurylcarnitine
184	19	48372298	rs296368	SULT2A1		C	-0.097	0.015	5.37e-11	pregn steroid monosulfate*
141	14	100844268	rs7161062	WDR25		A	0.356	0.054	5.35e-11	homoarginine	Yes
52	4	69519875	rs138762595	UGT2B17	missense_variant	A	-0.49	0.075	5.27e-11	cortolone glucuronide (1)		Bone mineral density QTL 12, osteoporosis, 612560 (3)
114	11	67191755	rs578222450	CARNS1	missense_variant	T	0.322	0.049	5.26e-11	5alpha-pregnan-3beta,20beta-diol monosulfate (1)
114	11	67191755	rs578222450	CARNS1	missense_variant	T	-0.327	0.05	4.98e-11	picolinoylglycine
130	13	101033921	rs145025874	PCCA		A	0.448	0.068	4.97e-11	propionylcarnitine	Yes	Propionicacidemia, 606054 (3), Autosomal recessive
1	1	6568981	rs74884944	PLEKHG5		A	-0.292	0.044	4.91e-11	beta-hydroxyisovalerate	Yes	Charcot-Marie-Tooth disease, recessive intermediate C, 615376 (3), Autosomal recessive; Spinal muscular atrophy, distal, autosomal recessive, 4, 611067 (3), Autosomal recessive
117	11	116648917	rs964184	ZPR1	3_prime_UTR_variant	G	-0.146	0.022	4.74e-11	X - 24870
36	3	15628040	rs74637339	HACL1	missense_variant	A	0.241	0.036	4.38e-11	2-hydroxyoctanoate	Yes
114	11	67191755	rs578222450	CARNS1	missense_variant	T	-0.3	0.045	4.32e-11	gamma-glutamylvaline
8	1	62941168	rs1469586932	DOCK7		GAA	-0.106	0.016	4.3e-11	1-stearoyl-GPI (18:0)		Epileptic encephalopathy, early infantile, 23, 615859 (3), Autosomal recessive
117	11	117053959	rs530885291	SIDT2		A	-0.865	0.131	4.27e-11	1-stearoyl-2-linoleoyl-GPE (18:0/18:2)*
178	19	15564115	rs57208996	RASAL3	missense_variant	T	1.163	0.176	4.22e-11	X - 24307
174	18	47157400	rs2000825	LIPG		T	-0.129	0.02	4.02e-11	1-stearoyl-2-dihomo-linolenoyl-GPI (18:0/20:3n3 or 6)*
61	5	1183560	rs11750211	SLC6A19		T	0.108	0.016	3.96e-11	3-methoxytyrosine		Hartnup disorder, 234500 (3), Autosomal recessive; Hyperglycinuria, 138500 (3), Autosomal dominant; Iminoglycinuria, digenic, 242600 (3), Autosomal recessive, Digenic recessive
12	1	89442733	rs10922532	CCBL2		T	-0.1	0.015	3.9e-11	X - 23639	Yes
183	19	45411941	rs429358	APOE	missense_variant	C	0.137	0.021	3.8e-11	1-stearoyl-2-linoleoyl-GPE (18:0/18:2)*		Alzheimer disease-2, 104310 (3), Autosomal dominant; Coronary artery disease, severe, susceptibility to, 617347 (3); Hyperlipoproteinemia, type III, 617347 (3); Lipoprotein glomerulopathy, 611771 (3); ?Macular degeneration, age-related, 603075 (3), Autosomal dominant; Sea-blue histiocyte disease, 269600 (3), Autosomal recessive
18	1	161594761	rs61803013	FCGR3B		T	0.758	0.114	3.71e-11	X - 12462		Neutropenia, alloimmune neonatal (3)
152	16	15089676	rs56252725	PDXDC1		A	-0.111	0.017	3.7e-11	1-stearoyl-2-dihomo-linolenoyl-GPI (18:0/20:3n3 or 6)*
174	18	47171888	rs8086351	LIPG		C	-0.129	0.019	3.61e-11	1-stearoyl-2-linoleoyl-GPI (18:0/18:2)
177	19	12998205	rs3817621	DNASE2		C	0.116	0.017	3.58e-11	arginine	Yes
65	5	131467589	rs143746337	CSF2		C	-0.915	0.138	3.47e-11	2-methylbutyrylcarnitine (C5)
119	11	129723106	rs2562249	TMEM45B		G	0.133	0.02	3.26e-11	X - 24870	Yes
24	2	27598097	rs4665972	SNX17		T	-0.101	0.015	3.16e-11	threonine
106	10	101593750	rs56050010	ABCC2		G	-0.218	0.033	3.1e-11	glycochenodeoxycholate glucuronide (1)		Dubin-Johnson syndrome, 237500 (3), Autosomal recessive
99	9	136155000	rs635634	ABO		T	-0.124	0.019	3.06e-11	O-sulfo-L-tyrosine		Blood group, ABO system, 616093 (3)
152	16	16102554	rs7199424	ABCC1		G	-0.099	0.015	3.02e-11	decanoylcarnitine
17	1	151868892	rs7542137	THEM4		C	-0.099	0.015	2.99e-11	beta-hydroxyisovalerate
138	14	77843920	rs61729313	SAMD15	synonymous_variant	G	-0.383	0.058	2.94e-11	vanillylmandelate (VMA)	Yes
160	16	79753976	rs57652769	MAF		T	-0.106	0.016	2.85e-11	methionine sulfone		Ayme-Gripp syndrome, 601088 (3), Autosomal dominant; Cataract 21, multiple types, 610202 (3), Autosomal dominant
44	3	125902417	rs9874508	ALDH1L1		A	0.098	0.015	2.81e-11	N-acetylglycine
156	16	56993161	rs12149545	CETP		A	0.107	0.016	2.7e-11	1-(1-enyl-palmitoyl)-2-arachidonoyl-GPC (P-16:0/20:4)*		High density lipoprotein cholesterol level QTL 10, 143470 (3), Autosomal dominant; Hyperalphalipoproteinemia, 143470 (3), Autosomal dominant
104	10	61468589	rs1171616	SLC16A9		G	-0.116	0.017	2.55e-11	linoleoylcarnitine*
65	5	131686146	rs10058074	SLC22A4		A	-0.096	0.014	2.52e-11	X - 11381		Rheumatoid arthritis, susceptibility to, 180300 (3)
66	5	138717277	rs72552254	SLC23A1		G	-0.281	0.042	2.5e-11	tartronate (hydroxymalonate)	Yes
52	4	69519875	rs138762595	UGT2B17	missense_variant	A	-0.469	0.07	2.33e-11	X - 15492		Bone mineral density QTL 12, osteoporosis, 612560 (3)
113	11	62963123	rs189314066	SLC22A25		G	0.201	0.03	2.32e-11	epiandrosterone sulfate
183	19	45412079	rs7412	APOE	missense_variant	T	-0.181	0.027	2.27e-11	stearoyl sphingomyelin (d18:1/18:0)		Alzheimer disease-2, 104310 (3), Autosomal dominant; Coronary artery disease, severe, susceptibility to, 617347 (3); Hyperlipoproteinemia, type III, 617347 (3); Lipoprotein glomerulopathy, 611771 (3); ?Macular degeneration, age-related, 603075 (3), Autosomal dominant; Sea-blue histiocyte disease, 269600 (3), Autosomal recessive
114	11	67191755	rs578222450	CARNS1	missense_variant	T	-0.311	0.046	2.26e-11	X - 21358
183	19	45425460	rs157595	APOC1		A	-0.102	0.015	2.22e-11	1-stearoyl-2-arachidonoyl-GPI (18:0/20:4)
135	14	64232386	rs17101394	SGPP1		A	-0.135	0.02	2.2e-11	N-palmitoyl-sphinganine (d18:0/16:0)
130	13	100515935	rs7992587	CLYBL		T	-0.111	0.017	2.19e-11	X - 11787	Yes
138	14	77843920	rs61729313	SAMD15	synonymous_variant	G	-0.374	0.056	2.14e-11	X - 21658	Yes
165	17	6948720	chr17:6948720	SLC16A13		T	0.131	0.02	2.14e-11	pantothenate
123	12	21352315	rs1871395	SLCO1B1		G	0.136	0.02	2.09e-11	5alpha-pregnan-3beta,20alpha-diol disulfate		Hyperbilirubinemia, Rotor type, digenic, 237450 (3), Digenic recessive
146	15	58723939	rs2070895	LIPC		A	0.12	0.018	2.08e-11	1-oleoyl-GPE (18:1)		Diabetes mellitus, noninsulin-dependent, 125853 (3), Autosomal dominant; Hepatic lipase deficiency, 614025 (3), Autosomal recessive; High density lipoprotein cholesterol level QTL 12, 612797 (3)
113	11	61593816	rs174568	FADS2		T	-0.109	0.016	2.05e-11	1-(1-enyl-oleoyl)-GPC (P-18:1)*
125	12	96317321	rs1198418276	CCDC38		A	-0.101	0.015	1.98e-11	histidine
27	2	73713072	rs13392872	ALMS1		A	0.123	0.018	1.97e-11	N-acetylglutamate		Alstrom syndrome, 203800 (3), Autosomal recessive
117	11	117053959	rs530885291	SIDT2		A	-0.875	0.13	1.97e-11	1-palmitoyl-2-linoleoyl-GPE (16:0/18:2)
114	11	67191755	rs578222450	CARNS1	missense_variant	T	-0.312	0.046	1.95e-11	vanillylmandelate (VMA)
114	11	67191755	rs578222450	CARNS1	missense_variant	T	-0.283	0.042	1.91e-11	pyroglutamine*
69	6	10985330	rs2093777	ELOVL2		C	-0.099	0.015	1.89e-11	1-pentadecanoyl-2-docosahexaenoyl-GPC (15:0/22:6)*
82	7	50602539	rs74876583	DDC		G	-0.162	0.024	1.72e-11	indoleacetate		Aromatic L-amino acid decarboxylase deficiency, 608643 (3), Autosomal recessive
114	11	67191755	rs578222450	CARNS1	missense_variant	T	-0.309	0.046	1.7e-11	propionylcarnitine
153	16	20609613	rs1276101672	ACSM2B		T	0.184	0.027	1.66e-11	beta-hydroxyisovalerate
106	10	102075479	rs603424	PKD2L1		A	-0.137	0.02	1.55e-11	palmitoleoyl-linoleoyl-glycerol (16:1/18:2) [1]*
184	19	48376941	rs296363	SULT2A1		C	-0.119	0.018	1.51e-11	metabolonic lactone sulfate
201	23	53365707	rs56801089	IQSEC2		A	-0.089	0.013	1.5e-11	tiglylcarnitine	Yes	Mental retardation, X-linked 1/78, 309530 (3), X-linked dominant
163	16	89704365	rs1126464	DPEP1	missense_variant	C	-0.115	0.017	1.48e-11	cystine
31	2	211380073	rs182706441	CPS1		G	-0.103	0.015	1.46e-11	gamma-glutamylcitrulline*		Carbamoylphosphate synthetase I deficiency, 237300 (3), Autosomal recessive; Pulmonary hypertension, neonatal, susceptibility to, 615371 (3); Venoocclusive disease after bone marrow transplantation (3)
48	3	195942487	rs2342307	ZDHHC19		A	0.095	0.014	1.37e-11	4-androsten-3beta,17beta-diol disulfate (2)
184	19	48398002	rs296373	SULT2A1		A	-0.139	0.021	1.37e-11	5alpha-androstan-3alpha,17beta-diol monosulfate (1)
188	20	12959885	rs1321940	SPTLC3		A	0.101	0.015	1.34e-11	sphingomyelin (d18:1/22:1, d18:2/22:0, d16:1/24:1)*
114	11	67191755	rs578222450	CARNS1	missense_variant	T	-0.328	0.048	1.3e-11	catechol sulfate
146	15	58730498	rs588136	LIPC		C	0.124	0.018	1.3e-11	1-(1-enyl-palmitoyl)-2-palmitoyl-GPC (P-16:0/16:0)*		Diabetes mellitus, noninsulin-dependent, 125853 (3), Autosomal dominant; Hepatic lipase deficiency, 614025 (3), Autosomal recessive; High density lipoprotein cholesterol level QTL 12, 612797 (3)
174	18	47167407	rs4939884	LIPG		T	-0.134	0.02	1.29e-11	1-palmitoyl-2-arachidonoyl-GPI (16:0/20:4)*
113	11	61588305	rs174564	FADS2		G	-0.107	0.016	1.28e-11	1-(1-enyl-palmitoyl)-2-arachidonoyl-GPE (P-16:0/20:4)*
113	11	61623140	rs174601	FADS2		T	0.106	0.016	1.25e-11	1-linoleoyl-GPC (18:2)
16	1	147129786	rs12145385	ACP6		A	0.111	0.016	1.16e-11	X - 24748	Yes
34	2	234619422	rs28898590	UGT1A8		T	-0.204	0.03	1.16e-11	X - 21339
57	4	103188709	rs13107325	SLC39A8	missense_variant	T	0.19	0.028	1.16e-11	2-oxoarginine*		Congenital disorder of glycosylation, type IIn, 616721 (3), Autosomal recessive
124	12	56863770	rs2657880	SPRYD4	3_prime_UTR_variant	C	-0.132	0.019	1.15e-11	gamma-glutamylglutamine
53	4	89243818	rs10022462	PPM1K		T	-0.103	0.015	1.13e-11	2-aminobutyrate		Maple syrup urine disease, mild variant, 615135 (3)
19	1	171347236	rs147349410	FMO4		G	-0.098	0.014	1.12e-11	X - 11381
173	18	33712194	rs79463406	ELP2		A	0.255	0.037	1.12e-11	7-methylguanine	Yes	Mental retardation, autosomal recessive 58, 617270 (3), Autosomal recessive
195	22	37421662	rs80236166	MPST		A	-0.212	0.031	1.11e-11	X - 13684	Yes
123	12	21331549	rs4149056	SLCO1B1	missense_variant	C	0.145	0.021	1.08e-11	biliverdin		Hyperbilirubinemia, Rotor type, digenic, 237450 (3), Digenic recessive
159	16	71639418	rs9746832	TAT		A	0.099	0.014	1.06e-11	gamma-glutamyltyrosine		Tyrosinemia, type II, 276600 (3), Autosomal recessive
34	2	234668879	rs34983651	UGT1A8		CAT	-0.11	0.016	1.05e-11	thyroxine
29	2	191163706	rs2664260	HIBCH		A	-0.105	0.015	9.63e-12	3-hydroxyhexanoate		3-hydroxyisobutryl-CoA hydrolase deficiency, 250620 (3), Autosomal recessive
8	1	63056112	rs1748197	DOCK7		A	-0.107	0.016	9.03e-12	1-stearoyl-2-dihomo-linolenoyl-GPI (18:0/20:3n3 or 6)*		Epileptic encephalopathy, early infantile, 23, 615859 (3), Autosomal recessive
85	7	72938718	rs62466264	BAZ1B		C	-0.13	0.019	8.88e-12	oleoyl-oleoyl-glycerol (18:1/18:1) [1]*
70	6	25870745	rs556339	SLC17A3		T	0.123	0.018	8.55e-12	cytidine		Gout susceptibility 4, 612671 (3), Autosomal dominant; Uric acid concentration, serum, QTL4, 612671 (3), Autosomal dominant
182	19	41353107	rs56113850	CYP2A6		T	0.104	0.015	8.35e-12	X - 21286		Coumarin resistance, 122700 (3), Autosomal dominant; Lung cancer, resistance to, 211980 (3), Autosomal recessive; Nicotine addiction, protection from, 188890 (3)
128	12	121392040	rs11065365	HNF1A		G	-0.101	0.015	8.32e-12	sphingomyelin (d18:1/18:1, d18:2/18:0)		Diabetes mellitus, insulin-dependent, 20, 612520 (3); Diabetes mellitus, insulin-dependent, 222100 (3), Autosomal recessive; Diabetes mellitus, noninsulin-dependent, 2, 125853 (3), Autosomal dominant; Hepatic adenoma, somatic, 142330 (3); MODY, type III, 600496 (3), Autosomal dominant; Renal cell carcinoma, 144700 (3)
66	5	138711524	rs59400871	SLC23A1		C	-0.249	0.036	7.76e-12	glycerate	Yes
122	12	7069329	rs185835888	PTPN6	missense_variant	T	-0.424	0.062	7.72e-12	cysteine s-sulfate
113	11	62179371	rs2509973	SCGB1A1		A	-0.103	0.015	7.58e-12	asparagine
52	4	69531775	rs200826068	UGT2B17		GTCC	-0.111	0.016	7.45e-12	X - 12844		Bone mineral density QTL 12, osteoporosis, 612560 (3)
180	19	33409784	rs1229715947	CEP89		CT	-0.109	0.016	7.26e-12	N-methylpipecolate
123	12	21347021	rs12367888	SLCO1B1		A	-0.121	0.018	7.21e-12	1-linoleoyl-GPE (18:2)*		Hyperbilirubinemia, Rotor type, digenic, 237450 (3), Digenic recessive
123	12	21357711	rs58310495	SLCO1B1		T	-0.141	0.02	7.21e-12	hydroxy-CMPF*		Hyperbilirubinemia, Rotor type, digenic, 237450 (3), Digenic recessive
139	14	91077172	rs373513556	TTC7B	missense_variant	T	-0.439	0.064	7.05e-12	X - 21658
179	19	19379549	rs58542926	HAPLN4	missense_variant	T	-0.196	0.029	6.8e-12	oleoyl-arachidonoyl-glycerol (18:1/20:4) [2]*
16	1	147129014	rs12119079	ACP6		G	0.114	0.017	6.56e-12	X - 24309	Yes
72	6	42917063	rs1196708262	CNPY3		CA	-0.101	0.015	6.32e-12	1-oleoyl-2-docosahexaenoyl-GPC (18:1/22:6)*		Epileptic encephalopathy, early infantile, 60, 617929 (3)
39	3	53282188	rs4687717	TKT		T	0.102	0.015	6.19e-12	erythritol		Short stature, developmental delay, and congenital heart defects, 617044 (3), Autosomal recessive
114	11	67191755	rs578222450	CARNS1	missense_variant	T	-0.306	0.044	5.89e-12	gamma-glutamylleucine
40	3	56849749	rs1354034	ARHGEF3		T	-0.112	0.016	5.87e-12	sphinganine	Yes
156	16	56998918	rs12720926	CETP		G	0.104	0.015	5.79e-12	1-(1-enyl-stearoyl)-2-linoleoyl-GPC (P-18:0/18:2)*		High density lipoprotein cholesterol level QTL 10, 143470 (3), Autosomal dominant; Hyperalphalipoproteinemia, 143470 (3), Autosomal dominant
135	14	64239877	rs112329286	SGPP1		TTTTA	0.134	0.019	5.19e-12	sphingomyelin (d18:2/23:0, d18:1/23:1, d17:1/24:1)*
23	1	248039451	rs3811444	TRIM58	missense_variant	T	0.114	0.016	5.07e-12	spermidine
113	11	65143892	rs34400381	SLC25A45	missense_variant	A	-0.258	0.037	5.05e-12	deoxycarnitine
123	12	21368015	rs58258204	SLCO1B1		T	0.14	0.02	4.98e-12	5alpha-androstan-3alpha,17beta-diol monosulfate (1)		Hyperbilirubinemia, Rotor type, digenic, 237450 (3), Digenic recessive
60	4	178361162	rs4690523	AGA		C	-0.103	0.015	4.96e-12	aspartate	Yes	Aspartylglucosaminuria, 208400 (3), Autosomal recessive
30	2	201526330	rs55754655	AOX1	missense_variant	G	0.172	0.025	4.85e-12	hydantoin-5-propionic acid	Yes
108	10	118394551	rs2286779	PNLIPRP2		G	-0.103	0.015	4.77e-12	1-stearoyl-2-oleoyl-GPC (18:0/18:1)
86	7	99332948	rs45446698	CYP3A5		G	-0.3	0.043	4.63e-12	5alpha-androstan-3beta,17alpha-diol disulfate		Hypertension, salt-sensitive essential, susceptibility to, 145500 (3), Multifactorial
197	22	50978520	rs131787	ODF3B		C	-0.108	0.016	4.61e-12	5,6-dihydrothymine
105	10	96389784	rs79172815	HELLS		A	0.218	0.031	4.47e-12	X - 17653		Immunodeficiency-centromeric instability-facial anomalies syndrome 4, 616911 (3), Autosomal recessive
158	16	68331890	rs2863979	SLC7A6	3_prime_UTR_variant	G	-0.114	0.016	4.39e-12	gamma-glutamyl-alpha-lysine
171	17	80190771	rs35121878	SLC16A3		C	-0.104	0.015	4.3e-12	imidazole lactate
121	12	349298	rs10774021	SLC6A13		C	-0.11	0.016	4.26e-12	guanidinoacetate
152	16	16102800	rs10689852	ABCC1		T	-0.103	0.015	4.23e-12	cis-4-decenoyl carnitine
178	19	15983485	rs62107766	CYP4F2		G	-0.112	0.016	4.03e-12	hexadecenedioate (C16:1-DC)*
136	14	67964688	rs12878807	TMEM229B		A	-0.099	0.014	3.73e-12	1-(1-enyl-palmitoyl)-2-oleoyl-GPC (P-16:0/18:1)*
29	2	191197226	rs291428	HIBCH		G	-0.105	0.015	3.62e-12	ethylmalonate		3-hydroxyisobutryl-CoA hydrolase deficiency, 250620 (3), Autosomal recessive
17	1	151845650	rs2338201	THEM4	3_prime_UTR_variant	G	-0.107	0.015	3.36e-12	dodecadienoate (12:2)*
117	11	117018764	rs539030095	PAFAH1B2		G	-0.878	0.126	3.26e-12	1-palmitoyl-2-docosahexaenoyl-GPE (16:0/22:6)*
127	12	111902514	rs140242317	ATXN2	missense_variant	A	0.484	0.069	3.21e-12	N-acetylcarnosine		Amyotrophic lateral sclerosis, susceptibility to, 13, 183090 (3), Autosomal dominant; Parkinson disease, late-onset, susceptibility to, 168600 (3), Isolated cases, Multifactorial; Spinocerebellar ataxia 2, 183090 (3), Autosomal dominant
85	7	72938718	rs62466264	BAZ1B		C	-0.132	0.019	3.12e-12	oleoyl-linoleoyl-glycerol (18:1/18:2) [1]
65	5	131640583	rs270613	SLC22A4		A	0.107	0.015	2.89e-12	palmitoleoylcarnitine*		Rheumatoid arthritis, susceptibility to, 180300 (3)
186	19	55741205	rs3826886	PPP6R1	3_prime_UTR_variant	A	-0.145	0.021	2.85e-12	1-(1-enyl-palmitoyl)-2-oleoyl-GPE (P-16:0/18:1)*	Yes
66	5	138717277	rs72552254	SLC23A1		G	-0.286	0.041	2.57e-12	threonate	Yes
113	11	61603510	rs174576	FADS2		A	-0.115	0.016	2.47e-12	1-lignoceroyl-GPC (24:0)
187	20	5077414	rs6076775	TMEM230		C	-0.105	0.015	2.47e-12	ascorbic acid 3-sulfate*	Yes
105	10	96832924	rs563757454	CYP2C8		CT	-0.12	0.017	2.43e-12	hydroxy-CMPF*		Rhabdomyolysis, cerivastatin-induced (3)
179	19	19370340	rs756350040	HAPLN4		T	-0.2	0.028	2.22e-12	1-myristoyl-2-arachidonoyl-GPC (14:0/20:4)*
17	1	151839838	rs12566232	THEM4		C	0.114	0.016	2.2e-12	undecenoylcarnitine (C11:1)
188	20	12962718	rs364585	SPTLC3		A	0.105	0.015	2.19e-12	sphingomyelin (d18:1/14:0, d16:1/16:0)*
164	17	4439152	rs1076073	SPNS2		G	-0.333	0.047	2.15e-12	O-methylcatechol sulfate
59	4	159622910	rs67481496	ETFDH		T	-0.118	0.017	2.1e-12	hexanoylcarnitine		Glutaric acidemia IIC, 231680 (3), Autosomal recessive
100	10	5306398	rs4339945	AKR1C4		G	-0.131	0.019	2.05e-12	4-androsten-3beta,17beta-diol disulfate (2)		46XY sex reversal 8, modifier of, 614279 (3), Autosomal recessive
6	1	54419526	rs12127960	LRRC42		T	-0.106	0.015	1.78e-12	thyroxine	Yes
164	17	4439152	rs1076073	SPNS2		G	-0.32	0.045	1.71e-12	X - 24513
10	1	76249590	rs12094842	RABGGTB		A	-0.127	0.018	1.66e-12	caproate (6:0)
113	11	61609750	rs174583	FADS2		T	-0.106	0.015	1.62e-12	1-(1-enyl-palmitoyl)-2-palmitoleoyl-GPC (P-16:0/16:1)*
40	3	56849749	rs1354034	ARHGEF3		T	-0.108	0.015	1.56e-12	aspartate	Yes
123	12	21352315	rs1871395	SLCO1B1		G	0.14	0.02	1.56e-12	21-hydroxypregnenolone disulfate		Hyperbilirubinemia, Rotor type, digenic, 237450 (3), Digenic recessive
114	11	67191755	rs578222450	CARNS1	missense_variant	T	-0.331	0.047	1.55e-12	arabitol/xylitol
66	5	138717277	rs72552254	SLC23A1		G	-0.293	0.041	1.45e-12	X - 24431	Yes
69	6	11044658	rs115367234	ELOVL2		T	-0.105	0.015	1.45e-12	1-docosahexaenoyl-GPE (22:6)*
131	13	103704000	rs7337216	SLC10A2		C	0.362	0.051	1.45e-12	taurolithocholate 3-sulfate	Yes	Bile acid malabsorption, primary, 613291 (3), Autosomal recessive
151	16	2300918	rs138830436	ECI1		AT	0.147	0.021	1.45e-12	dodecadienoate (12:2)*	Yes
152	16	16124714	rs997691	ABCC1		T	-0.109	0.015	1.43e-12	succinylcarnitine
113	11	61542006	rs1219849860	MYRF		G	-0.111	0.016	1.42e-12	1-eicosapentaenoyl-GPE (20:5)*
114	11	67191755	rs578222450	CARNS1	missense_variant	T	-0.342	0.048	1.42e-12	5-acetylamino-6-amino-3-methyluracil
148	15	76560265	rs34893715	ETFA		G	0.105	0.015	1.39e-12	isobutyrylcarnitine		Glutaric acidemia IIA, 231680 (3), Autosomal recessive
186	19	55739813	rs10419308	TMEM86B		A	-0.136	0.019	1.36e-12	1-(1-enyl-palmitoyl)-2-arachidonoyl-GPE (P-16:0/20:4)*	Yes
139	14	90397880	rs189640071	EFCAB11		T	0.495	0.07	1.3e-12	N-acetylcarnosine
169	17	57362614	rs116986845	GDPD1		T	0.336	0.047	1.3e-12	1-palmityl-2-arachidonoyl-GPC (O-16:0/20:4)*	Yes
71	6	39904491	rs75773116	MOCS1		G	-0.466	0.066	1.26e-12	cysteine s-sulfate	Yes	Molybdenum cofactor deficiency A, 252150 (3), Autosomal recessive
58	4	130034927	rs10701163	SCLT1		G	0.128	0.018	1.24e-12	N-acetylglucosamine/N-acetylgalactosamine	Yes
69	6	10986812	rs9379996	ELOVL2		G	-0.107	0.015	1.22e-12	1-docosahexaenoyl-GPC (22:6)*
183	19	45412079	rs7412	APOE	missense_variant	T	-0.197	0.028	1.11e-12	X - 24870		Alzheimer disease-2, 104310 (3), Autosomal dominant; Coronary artery disease, severe, susceptibility to, 617347 (3); Hyperlipoproteinemia, type III, 617347 (3); Lipoprotein glomerulopathy, 611771 (3); ?Macular degeneration, age-related, 603075 (3), Autosomal dominant; Sea-blue histiocyte disease, 269600 (3), Autosomal recessive
164	17	4439152	rs1076073	SPNS2		G	-0.321	0.045	1.06e-12	X - 21658
70	6	25769789	rs12209125	SLC17A4		C	0.102	0.014	1.02e-12	X - 21364
106	10	102075479	rs603424	PKD2L1		A	-0.138	0.019	9.08e-13	5-dodecenoate (12:1n7)
70	6	25835439	rs755584014	SLC17A1		C	-0.111	0.015	8.28e-13	4-androsten-3beta,17beta-diol monosulfate (2)
128	12	121417536	rs3830659	HNF1A		GACTC	0.11	0.015	8.07e-13	alpha-hydroxyisovalerate		Diabetes mellitus, insulin-dependent, 20, 612520 (3); Diabetes mellitus, insulin-dependent, 222100 (3), Autosomal recessive; Diabetes mellitus, noninsulin-dependent, 2, 125853 (3), Autosomal dominant; Hepatic adenoma, somatic, 142330 (3); MODY, type III, 600496 (3), Autosomal dominant; Renal cell carcinoma, 144700 (3)
128	12	121424861	rs7310409	HNF1A		A	0.123	0.017	7.79e-13	cysteine-glutathione disulfide		Diabetes mellitus, insulin-dependent, 20, 612520 (3); Diabetes mellitus, insulin-dependent, 222100 (3), Autosomal recessive; Diabetes mellitus, noninsulin-dependent, 2, 125853 (3), Autosomal dominant; Hepatic adenoma, somatic, 142330 (3); MODY, type III, 600496 (3), Autosomal dominant; Renal cell carcinoma, 144700 (3)
75	6	110760008	rs12210538	SLC22A16	missense_variant	G	-0.124	0.017	7.21e-13	myristoylcarnitine
117	11	116623213	rs1223100496	BUD13		TA	0.155	0.021	6.76e-13	palmitoyl-oleoyl-glycerol (16:0/18:1) [2]*
183	19	45416741	rs438811	TOMM40		T	0.133	0.018	6.7e-13	linoleoyl-linoleoyl-glycerol (18:2/18:2) [1]*
171	17	80190771	rs35121878	SLC16A3		C	-0.108	0.015	6.39e-13	malate
123	12	21365137	rs201210393	SLCO1B1		A	0.15	0.021	5.7e-13	taurolithocholate 3-sulfate		Hyperbilirubinemia, Rotor type, digenic, 237450 (3), Digenic recessive
36	3	15628040	rs74637339	HACL1	missense_variant	A	0.24	0.033	5.68e-13	N-acetyl-2-aminooctanoate*	Yes
95	8	145717741	rs2251727	PPP1R16A		T	-0.109	0.015	5.45e-13	fumarate
67	5	150845804	rs7730542	SLC36A1		G	0.179	0.025	5.44e-13	N,N-dimethylalanine
150	15	85504753	rs111460093	SLC28A1		C	-0.223	0.031	5.42e-13	pseudouridine	Yes
94	8	39790265	rs62512638	IDO1		A	-0.108	0.015	5e-13	kynurenine
78	6	160569961	rs1360404330	SLC22A1		GA	0.112	0.015	4.77e-13	N-acetyl-isoputreanine*
86	7	99332948	rs45446698	CYP3A5		G	-0.248	0.034	4.76e-13	androsterone glucuronide		Hypertension, salt-sensitive essential, susceptibility to, 145500 (3), Multifactorial
84	7	64039465	rs7806596	ZNF680		A	-0.101	0.014	4.25e-13	pregnen-diol disulfate*	Yes
94	8	39788170	rs7000868	IDO1		G	-0.11	0.015	3.91e-13	quinolinate
53	4	89225088	rs9995984	PPM1K		G	0.108	0.015	3.76e-13	3-methyl-2-oxobutyrate		Maple syrup urine disease, mild variant, 615135 (3)
183	19	45426792	rs141622900	APOC1		A	-0.237	0.033	3.73e-13	palmitoyl dihydrosphingomyelin (d18:0/16:0)*
30	2	201521509	rs76083840	AOX1		T	-0.194	0.027	3.7e-13	7-methylguanine	Yes
123	12	21408355	rs1401957239	SLCO1A2		C	0.154	0.021	3.7e-13	2-arachidonoyl-GPE (20:4)*
138	14	77843920	rs61729313	SAMD15	synonymous_variant	G	-0.414	0.057	3.69e-13	X - 24513	Yes
164	17	4439152	rs1076073	SPNS2		G	-0.328	0.045	3.65e-13	2,3-dihydroxy-5-methylthio-4-pentenoate (DMTPA)*
17	1	151920040	rs7538652	THEM4		T	-0.12	0.016	3.46e-13	3-hydroxylaurate
152	16	16142079	rs60782127	ABCC1	missense_variant	T	-0.47	0.064	3.37e-13	octanoylcarnitine
114	11	67191755	rs578222450	CARNS1	missense_variant	T	-0.339	0.046	3.26e-13	1-ribosyl-imidazoleacetate*
35	2	241827696	rs4675869	AGXT		A	-0.118	0.016	3.02e-13	X - 23639		Hyperoxaluria, primary, type 1, 259900 (3), Autosomal recessive
52	4	69451027	rs12504563	UGT2B17		G	-0.128	0.018	2.99e-13	5alpha-androstan-3beta,17beta-diol monosulfate (2)		Bone mineral density QTL 12, osteoporosis, 612560 (3)
24	2	27730940	rs1260326	GCKR	missense_variant,splice_region_variant	T	-0.111	0.015	2.84e-13	gamma-glutamylthreonine		Fasting plasma glucose level QTL 5, 613463 (3)
4	1	20916444	rs588485	CDA		A	-0.117	0.016	2.46e-13	uridine	Yes
156	16	56990716	rs247617	CETP		A	0.116	0.016	2.46e-13	1-palmitoyl-2-linoleoyl-GPC (16:0/18:2)		High density lipoprotein cholesterol level QTL 10, 143470 (3), Autosomal dominant; Hyperalphalipoproteinemia, 143470 (3), Autosomal dominant
113	11	61571382	rs174549	FADS1		A	-0.116	0.016	2.24e-13	sphingomyelin (d18:1/18:1, d18:2/18:0)
177	19	12509536	rs4804181	ZNF799		C	0.135	0.018	2.17e-13	X - 12844	Yes
145	15	50474766	rs1648348	SLC27A2	missense_variant	A	-0.115	0.016	2.06e-13	X - 11372
128	12	121415293	rs7139079	HNF1A		G	-0.108	0.015	2.01e-13	sphingomyelin (d18:1/20:1, d18:2/20:0)*		Diabetes mellitus, insulin-dependent, 20, 612520 (3); Diabetes mellitus, insulin-dependent, 222100 (3), Autosomal recessive; Diabetes mellitus, noninsulin-dependent, 2, 125853 (3), Autosomal dominant; Hepatic adenoma, somatic, 142330 (3); MODY, type III, 600496 (3), Autosomal dominant; Renal cell carcinoma, 144700 (3)
190	20	45241378	rs2425879	SLC13A3		G	0.141	0.019	1.92e-13	malate	Yes
36	3	15628040	rs74637339	HACL1	missense_variant	A	0.251	0.034	1.8e-13	2-aminooctanoate	Yes
188	20	12969400	rs680379	SPTLC3		A	0.111	0.015	1.75e-13	sphingomyelin (d18:1/17:0, d17:1/18:0, d19:1/16:0)
65	5	131637338	rs270612	SLC22A4		G	0.121	0.016	1.68e-13	hexanoylcarnitine		Rheumatoid arthritis, susceptibility to, 180300 (3)
100	10	5262963	chr10:5262963	AKR1C4		A	0.147	0.02	1.47e-13	5alpha-pregnan-3beta,20alpha-diol monosulfate (2)		46XY sex reversal 8, modifier of, 614279 (3), Autosomal recessive
86	7	99366316	rs35599367	CYP3A4		A	-0.244	0.033	1.44e-13	methionine sulfone
100	10	5262963	chr10:5262963	AKR1C4		A	0.146	0.02	1.44e-13	5alpha-pregnan-3beta,20alpha-diol disulfate		46XY sex reversal 8, modifier of, 614279 (3), Autosomal recessive
39	3	52212054	rs190202562	POC1A		T	1.483	0.2	1.41e-13	N-acetylalanine		Short stature, onychodysplasia, facial dysmorphism, and hypotrichosis, 614813 (3), Autosomal recessive
191	20	62139177	rs6122466	EEF1A2		G	0.155	0.021	1.4e-13	guanidinoacetate	Yes	Epileptic encephalopathy, early infantile, 33, 616409 (3), Autosomal dominant; Mental retardation, autosomal dominant 38, 616393 (3), Autosomal dominant
168	17	38126911	rs773846441	GSDMA		A	0.111	0.015	1.36e-13	lactosyl-N-palmitoyl-sphingosine (d18:1/16:0)
97	9	131570178	rs45609236	TBC1D13	3_prime_UTR_variant	T	-0.132	0.018	1.33e-13	phenylpyruvate
114	11	67191755	rs578222450	CARNS1	missense_variant	T	-0.354	0.048	1.29e-13	O-methylcatechol sulfate
117	11	117053959	rs530885291	SIDT2		A	-0.971	0.131	1.27e-13	1-stearoyl-2-arachidonoyl-GPE (18:0/20:4)
53	4	89054667	rs4148155	ABCG2		G	0.158	0.021	1.26e-13	urate		Junior blood group system, 614490 (3); Uric acid concentration, serum, QTL1, 138900 (3), ?Autosomal dominant
70	6	25870745	rs556339	SLC17A3		T	0.127	0.017	1.26e-13	4-allylphenol sulfate		Gout susceptibility 4, 612671 (3), Autosomal dominant; Uric acid concentration, serum, QTL4, 612671 (3), Autosomal dominant
94	8	39792943	rs1349290860	IDO2		G	-0.113	0.015	1.23e-13	X - 12100
128	12	121417536	rs3830659	HNF1A		GACTC	0.113	0.015	1.18e-13	2-hydroxy-3-methylvalerate		Diabetes mellitus, insulin-dependent, 20, 612520 (3); Diabetes mellitus, insulin-dependent, 222100 (3), Autosomal recessive; Diabetes mellitus, noninsulin-dependent, 2, 125853 (3), Autosomal dominant; Hepatic adenoma, somatic, 142330 (3); MODY, type III, 600496 (3), Autosomal dominant; Renal cell carcinoma, 144700 (3)
70	6	25817789	rs1165153	SLC17A1		A	-0.118	0.016	1.12e-13	N-acetylhistidine
101	10	12133252	rs7094385	DHTKD1		G	-0.13	0.017	1.01e-13	2-aminoadipate	Yes	2-aminoadipic 2-oxoadipic aciduria, 204750 (3), Autosomal recessive; ?Charcot-Marie-Tooth disease, axonal, type 2Q, 615025 (3), Autosomal dominant
78	6	160633325	rs4629714	SLC22A2		C	0.129	0.017	1e-13	N1-methyladenosine
152	16	15117299	rs4074872	PDXDC1		A	-0.124	0.017	9.84e-14	dihomo-linolenate (20:3n3 or n6)
10	1	76177332	rs942270	ACADM		A	0.123	0.016	9.17e-14	glutamine conjugate of C6H10O2 (2)*		Acyl-CoA dehydrogenase, medium chain, deficiency of, 201450 (3), Autosomal recessive
91	8	18080116	rs4986782	NAT1	missense_variant	A	-0.411	0.055	8.92e-14	N-acetyltaurine
33	2	219678877	rs41272687	CYP27A1	missense_variant	T	-0.373	0.05	8.72e-14	7-alpha-hydroxy-3-oxo-4-cholestenoate (7-Hoca)	Yes	Cerebrotendinous xanthomatosis, 213700 (3), Autosomal recessive
10	1	76135946	rs7552404	SLC44A5		G	-0.133	0.018	8.55e-14	caprylate (8:0)
28	2	135605014	rs76328456	ACMSD		G	-0.142	0.019	8.18e-14	quinolinate
153	16	20444695	rs34927101	ACSM5		T	0.419	0.056	8.03e-14	3-phenylpropionate (hydrocinnamate)
140	14	94791601	rs6575415	SERPINA6		A	0.139	0.019	7.72e-14	cortisol		Corticosteroid-binding globulin deficiency, 611489 (3), Autosomal recessive, Autosomal dominant
123	12	21367382	rs11045866	SLCO1B1		C	0.14	0.019	7.39e-14	4-androsten-3beta,17beta-diol disulfate (2)		Hyperbilirubinemia, Rotor type, digenic, 237450 (3), Digenic recessive
10	1	76123973	rs6672180	SLC44A5		G	-0.121	0.016	7.28e-14	X - 23680
105	10	96960315	rs147096448	PDLIM1		A	-0.11	0.015	7.27e-14	3-hydroxy-2-ethylpropionate
117	11	116648917	rs964184	ZPR1	3_prime_UTR_variant	G	0.17	0.023	7.16e-14	palmitoleoyl-linoleoyl-glycerol (16:1/18:2) [1]*
100	10	5261829	rs117849125	AKR1C4		T	0.142	0.019	6.83e-14	5alpha-androstan-3beta,17beta-diol disulfate		46XY sex reversal 8, modifier of, 614279 (3), Autosomal recessive
156	16	56994528	rs17231506	CETP		T	0.136	0.018	6.42e-14	1-palmityl-2-stearoyl-GPC (O-16:0/18:0)*		High density lipoprotein cholesterol level QTL 10, 143470 (3), Autosomal dominant; Hyperalphalipoproteinemia, 143470 (3), Autosomal dominant
136	14	67966599	rs10873201	TMEM229B		T	-0.111	0.015	6.07e-14	1-(1-enyl-palmitoyl)-2-docosahexaenoyl-GPC (P-16:0/22:6)*
70	6	25867566	rs1165206	SLC17A3		A	-0.103	0.014	6.03e-14	4-androsten-3beta,17beta-diol disulfate (2)		Gout susceptibility 4, 612671 (3), Autosomal dominant; Uric acid concentration, serum, QTL4, 612671 (3), Autosomal dominant
24	2	27598097	rs4665972	SNX17		T	0.113	0.015	5.98e-14	2-hydroxybutyrate/2-hydroxyisobutyrate
31	2	211540507	rs1047891	CPS1	missense_variant	A	0.132	0.018	5.61e-14	X - 17325		Carbamoylphosphate synthetase I deficiency, 237300 (3), Autosomal recessive; Pulmonary hypertension, neonatal, susceptibility to, 615371 (3); Venoocclusive disease after bone marrow transplantation (3)
113	11	61591636	rs174565	FADS2		G	-0.179	0.024	5.61e-14	docosapentaenoate (n6 DPA; 22:5n6)
106	10	102075479	rs603424	PKD2L1		A	-0.144	0.019	5.03e-14	palmitoleoylcarnitine*
117	11	117053959	rs530885291	SIDT2		A	-0.984	0.13	4.89e-14	1-palmitoyl-2-arachidonoyl-GPE (16:0/20:4)*
116	11	110247797	rs1573558	FDX1		T	0.121	0.016	4.81e-14	taurocholenate sulfate	Yes
159	16	72114091	rs183335264	HPR		C	-0.326	0.043	4.67e-14	orotate
106	10	102075479	rs603424	PKD2L1		A	-0.144	0.019	4.62e-14	myristoleate (14:1n5)
177	19	12502457	rs4804669	ZNF799	missense_variant	A	0.139	0.018	4.59e-14	etiocholanolone glucuronide	Yes
17	1	151845650	rs2338201	THEM4	3_prime_UTR_variant	G	-0.116	0.015	4.58e-14	tetradecadienoate (14:2)*
145	15	50488859	rs2554887	SLC27A2		T	-0.122	0.016	4.3e-14	tridecenedioate (C13:1-DC)*
183	19	45410002	rs769449	APOE		A	0.17	0.022	3.81e-14	cholesterol		Alzheimer disease-2, 104310 (3), Autosomal dominant; Coronary artery disease, severe, susceptibility to, 617347 (3); Hyperlipoproteinemia, type III, 617347 (3); Lipoprotein glomerulopathy, 611771 (3); ?Macular degeneration, age-related, 603075 (3), Autosomal dominant; Sea-blue histiocyte disease, 269600 (3), Autosomal recessive
113	11	61593816	rs174568	FADS2		T	-0.116	0.015	3.58e-14	1-(1-enyl-palmitoyl)-2-oleoyl-GPC (P-16:0/18:1)*
92	8	19817361	rs304	LPL		G	-0.133	0.018	3.49e-14	oleoyl-linoleoyl-glycerol (18:1/18:2) [1]		Combined hyperlipidemia, familial, 144250 (3), Autosomal dominant; High density lipoprotein cholesterol level QTL 11 (3); Lipoprotein lipase deficiency, 238600 (3), Autosomal recessive
123	12	21369975	chr12:21369975	SLCO1B1		T	0.155	0.02	3.47e-14	X - 11299		Hyperbilirubinemia, Rotor type, digenic, 237450 (3), Digenic recessive
106	10	102075479	rs603424	PKD2L1		A	-0.148	0.019	3.44e-14	9-hydroxystearate
167	17	19431158	rs5819674	SLC47A1		GA	0.117	0.015	3.42e-14	N-acetyl-isoputreanine*
183	19	45425178	rs190712692	APOC1		A	-0.249	0.033	3.22e-14	sphingomyelin (d18:1/24:1, d18:2/24:0)*
75	6	111551351	rs113500008	SLC16A10		T	0.18	0.024	3.08e-14	gamma-glutamyltyrosine
152	16	16097855	rs929082212	ABCC1		TGGTGGGTG	-0.112	0.015	2.89e-14	X - 15469
199	23	6827042	rs7471907	HDHD1		T	-0.085	0.011	2.87e-14	pregnen-diol disulfate*	Yes
146	15	58680643	rs35853021	LIPC		T	0.117	0.015	2.84e-14	oleoyl-arachidonoyl-glycerol (18:1/20:4) [2]*		Diabetes mellitus, noninsulin-dependent, 125853 (3), Autosomal dominant; Hepatic lipase deficiency, 614025 (3), Autosomal recessive; High density lipoprotein cholesterol level QTL 12, 612797 (3)
34	2	234668290	rs34916116	UGT1A8		A	0.242	0.032	2.82e-14	p-cresol-glucuronide*
67	5	150764239	rs143370068	SLC36A2		T	-0.535	0.07	2.8e-14	carnitine		Hyperglycinuria, 138500 (3), Autosomal dominant; Iminoglycinuria, digenic, 242600 (3), Autosomal recessive, Digenic recessive
34	2	234580678	rs72551330	UGT1A8	missense_variant	C	0.553	0.072	2.77e-14	indoleacetate
65	5	131670546	rs272879	SLC22A4		C	0.117	0.015	2.77e-14	butyrylcarnitine		Rheumatoid arthritis, susceptibility to, 180300 (3)
114	11	67191755	rs578222450	CARNS1	missense_variant	T	-0.344	0.045	2.72e-14	gamma-glutamylisoleucine*
70	6	25824809	rs9467618	SLC17A1		T	0.133	0.017	2.34e-14	5alpha-androstan-3beta,17beta-diol monosulfate (2)
76	6	127755910	rs531874876	SOGA3		C	1.057	0.138	2.27e-14	ethylmalonate
67	5	150679610	rs74823953	SLC36A3		T	-0.456	0.06	2.07e-14	pyroglutamine*
128	12	121419926	rs1169284	HNF1A		C	0.122	0.016	2.05e-14	sulfate*		Diabetes mellitus, insulin-dependent, 20, 612520 (3); Diabetes mellitus, insulin-dependent, 222100 (3), Autosomal recessive; Diabetes mellitus, noninsulin-dependent, 2, 125853 (3), Autosomal dominant; Hepatic adenoma, somatic, 142330 (3); MODY, type III, 600496 (3), Autosomal dominant; Renal cell carcinoma, 144700 (3)
92	8	19817361	rs304	LPL		G	-0.134	0.018	1.97e-14	oleoyl-linoleoyl-glycerol (18:1/18:2) [2]		Combined hyperlipidemia, familial, 144250 (3), Autosomal dominant; High density lipoprotein cholesterol level QTL 11 (3); Lipoprotein lipase deficiency, 238600 (3), Autosomal recessive
183	19	45416741	rs438811	TOMM40		T	0.133	0.017	1.91e-14	oleoyl-linoleoyl-glycerol (18:1/18:2) [2]
42	3	100211294	rs7616839	TMEM45A		A	-0.113	0.015	1.83e-14	2-hydroxypalmitate	Yes
95	8	144685271	rs3816477	EEF1D		T	-0.174	0.023	1.7e-14	1-ribosyl-imidazoleacetate*
103	10	46084243	rs12242611	2019-03-08		A	-0.133	0.017	1.63e-14	N-trimethyl 5-aminovalerate
185	19	54676763	rs641738	TMC4	5_prime_UTR_variant	T	-0.118	0.015	1.61e-14	1-palmitoyl-2-arachidonoyl-GPI (16:0/20:4)*
154	16	28249016	rs539659446	XPO6		G	0.602	0.078	1.39e-14	p-cresol-glucuronide*	Yes
117	11	116623213	rs1223100496	BUD13		TA	0.166	0.022	1.36e-14	palmitoyl-linoleoyl-glycerol (16:0/18:2) [1]*
48	3	195942080	rs5855544	ZDHHC19		T	0.107	0.014	1.24e-14	4-androsten-3beta,17beta-diol disulfate (1)
131	13	103718308	rs55971546	SLC10A2	missense_variant	T	0.284	0.037	1.14e-14	glycolithocholate sulfate*	Yes	Bile acid malabsorption, primary, 613291 (3), Autosomal recessive
156	16	56993161	rs12149545	CETP		A	0.123	0.016	1.14e-14	1-(1-enyl-palmitoyl)-2-linoleoyl-GPC (P-16:0/18:2)*		High density lipoprotein cholesterol level QTL 10, 143470 (3), Autosomal dominant; Hyperalphalipoproteinemia, 143470 (3), Autosomal dominant
31	2	211367186	rs975530777	CPS1		G	-0.115	0.015	1e-14	citrulline		Carbamoylphosphate synthetase I deficiency, 237300 (3), Autosomal recessive; Pulmonary hypertension, neonatal, susceptibility to, 615371 (3); Venoocclusive disease after bone marrow transplantation (3)
174	18	47182664	rs1540037	LIPG		A	-0.142	0.018	9.49e-15	1-stearoyl-2-arachidonoyl-GPI (18:0/20:4)
7	1	60019853	rs62623594	FGGY	5_prime_UTR_variant	T	0.244	0.031	8.5e-15	ribitol	Yes
202	23	105365086	rs139669326	MUM1L1		C	-0.326	0.042	8.25e-15	thyroxine	Yes
13	1	98061402	rs1337523	DPYD		C	0.172	0.022	7.43e-15	uracil	Yes	Dihydropyrimidine dehydrogenase deficiency, 274270 (3), Autosomal recessive; 5-fluorouracil toxicity, 274270 (3), Autosomal recessive
73	6	52727557	rs9689405	GSTA5		C	-0.127	0.016	7.37e-15	1,3,7-trimethylurate	Yes
96	9	35734956	rs10814274	CREB3		T	0.115	0.015	7.05e-15	glycosyl-N-stearoyl-sphingosine (d18:1/18:0)	Yes
167	17	19474875	rs111653425	SLC47A1	missense_variant	T	0.537	0.069	7.01e-15	N-trimethyl 5-aminovalerate
164	17	4943176	rs10445262	SLC52A1		G	-0.136	0.017	6.66e-15	N-acetyl-isoputreanine*		Riboflavin deficiency, 615026 (3), Autosomal dominant
75	6	110760008	rs12210538	SLC22A16	missense_variant	G	-0.135	0.017	6.48e-15	palmitoleoylcarnitine*
184	19	49206674	rs601338	FUT2		A	0.117	0.015	6.48e-15	X - 17653		Bombay phenotype (3); Norwalk virus infection, resistance to (3); Vitamin B12 plasma level QTL1, 612542 (3)
114	11	67191755	rs578222450	CARNS1	missense_variant	T	-0.355	0.045	6.35e-15	2,3-dihydroxy-5-methylthio-4-pentenoate (DMTPA)*
24	2	27471025	rs1561535	CAD		T	-0.131	0.017	6.26e-15	pantothenate		Epileptic encephalopathy, early infantile, 50, 616457 (3), Autosomal recessive
130	13	101201352	rs9585455	GGACT		A	-0.115	0.015	6.05e-15	X - 23593	Yes
113	11	61571348	rs174548	FADS1		G	0.128	0.016	5.88e-15	1-palmityl-2-linoleoyl-GPC (O-16:0/18:2)*
28	2	135722143	rs1592	CCNT2	3_prime_UTR_variant	C	-0.112	0.014	5.82e-15	1,5-anhydroglucitol (1,5-AG)
184	19	48363039	rs2547244	CRX		T	-0.149	0.019	5.66e-15	androsterone sulfate		Cone-rod retinal dystrophy-2, 120970 (3), Autosomal dominant; Leber congenital amaurosis 7, 613829 (3)
197	22	50746131	rs543237456	PLXNB2		C	0.431	0.055	5.06e-15	4-acetamidobutanoate
70	6	25834966	rs1265387721	SLC17A1		GA	0.12	0.015	4.95e-15	decadienedioic acid (C10:2-DC)**
65	5	131766763	rs766751473	SLC22A5		T	0.119	0.015	4.75e-15	ergothioneine		Carnitine deficiency, systemic primary, 212140 (3), Autosomal recessive
153	16	20492951	rs544893824	ACSM2A		TTAGA	-0.361	0.046	4.2e-15	X - 18921
117	11	116648917	rs964184	ZPR1	3_prime_UTR_variant	G	0.175	0.022	4.19e-15	1-linoleoylglycerol (18:2)
185	19	54676814	rs34564463	TMC4	5_prime_UTR_variant	GC	-0.119	0.015	4.08e-15	1-arachidonoyl-GPI (20:4)*
113	11	61567753	rs174544	FADS1	3_prime_UTR_variant	A	-0.124	0.016	4.06e-15	sphingomyelin (d18:1/20:1, d18:2/20:0)*
184	19	49209010	rs503279	FUT2	3_prime_UTR_variant	T	-0.119	0.015	3.5e-15	X - 17654		Bombay phenotype (3); Norwalk virus infection, resistance to (3); Vitamin B12 plasma level QTL1, 612542 (3)
113	11	61618608	rs174592	FADS2		G	-0.127	0.016	3.36e-15	1-(1-enyl-palmitoyl)-2-myristoyl-GPC (P-16:0/14:0)*
3	1	19186365	rs76018454	TAS1R2		A	0.335	0.042	3.26e-15	S-1-pyrroline-5-carboxylate	Yes
70	6	25817789	rs1165153	SLC17A1		A	0.115	0.015	2.97e-15	hydroxy-CMPF*
36	3	15886817	rs1383123528	ANKRD28		GTA	0.283	0.036	2.66e-15	X - 18913	Yes
75	6	110760008	rs12210538	SLC22A16	missense_variant	G	0.14	0.018	2.49e-15	ergothioneine
5	1	47405408	rs9332996	CYP4A11		C	0.188	0.024	2.47e-15	X - 24309
14	1	110230075	chr1:110230075	GSTM1		G	0.134	0.017	2.12e-15	N-trimethyl 5-aminovalerate
104	10	61459156	rs757036583	SLC16A9		T	-0.148	0.019	2.12e-15	isobutyrylcarnitine
180	19	33402419	rs8101667	CEP89		T	-0.124	0.016	2.06e-15	methionine sulfone
134	14	59950803	rs144784111	L3HYPDH	5_prime_UTR_variant	T	0.399	0.05	2.04e-15	X - 24243	Yes
98	9	133323675	rs10901047	ASS1		C	0.121	0.015	1.88e-15	citrulline	Yes	Citrullinemia, 215700 (3), Autosomal recessive
70	6	25824809	rs9467618	SLC17A1		T	0.137	0.017	1.64e-15	4-ethylphenylsulfate
126	12	103242396	rs1718309	PAH		A	0.118	0.015	1.44e-15	gamma-glutamylphenylalanine		Hyperphenylalaninemia, non-PKU mild, 261600 (3), Autosomal recessive; Phenylketonuria, 261600 (3), Autosomal recessive
61	5	1212453	rs121434346	SLC6A19	missense_variant	A	-0.905	0.113	1.34e-15	N-delta-acetylornithine		Hartnup disorder, 234500 (3), Autosomal recessive; Hyperglycinuria, 138500 (3), Autosomal dominant; Iminoglycinuria, digenic, 242600 (3), Autosomal recessive, Digenic recessive
166	17	11502566	rs78389613	DNAH9		C	1.627	0.203	1.24e-15	X - 24307	Yes
189	20	43271392	rs406383	ADA		G	-0.139	0.017	1.21e-15	N1-methyladenosine	Yes	Adenosine deaminase deficiency, partial, 102700 (3), Autosomal recessive, Somatic mosaicism; Severe combined immunodeficiency due to ADA deficiency, 102700 (3), Autosomal recessive, Somatic mosaicism
117	11	116623213	rs1223100496	BUD13		TA	0.171	0.021	1.07e-15	1-stearoyl-2-arachidonoyl-GPI (18:0/20:4)
110	11	2203154	rs11043003	TH		C	0.139	0.017	9.96e-16	dopamine sulfate (2)	Yes	Segawa syndrome, recessive, 605407 (3), Autosomal recessive
184	19	48368895	rs36146330	SULT2A1		A	0.161	0.02	8.61e-16	5alpha-pregnan-3beta,20alpha-diol monosulfate (2)
113	11	61549025	rs174533	MYRF		A	-0.127	0.016	8.06e-16	1-docosahexaenoyl-GPC (22:6)*
183	19	45416741	rs438811	TOMM40		T	0.14	0.017	7.94e-16	oleoyl-linoleoyl-glycerol (18:1/18:2) [1]
153	16	20492951	rs544893824	ACSM2A		TTAGA	-0.375	0.047	7.86e-16	X - 21319
148	15	76610235	rs78185702	ETFA		T	0.2	0.025	7.82e-16	dimethylglycine		Glutaric acidemia IIA, 231680 (3), Autosomal recessive
65	5	131690241	rs272849	SLC22A4		A	0.118	0.015	7.49e-16	propionylcarnitine		Rheumatoid arthritis, susceptibility to, 180300 (3)
70	6	25872811	rs10632274	SLC17A3		C	0.128	0.016	6.4e-16	16a-hydroxy DHEA 3-sulfate		Gout susceptibility 4, 612671 (3), Autosomal dominant; Uric acid concentration, serum, QTL4, 612671 (3), Autosomal dominant
46	3	142663950	rs4683714	PAQR9		A	0.134	0.017	5.57e-16	1-palmitoyl-2-oleoyl-GPI (16:0/18:1)*
106	10	102075479	rs603424	PKD2L1		A	-0.155	0.019	5.49e-16	palmitoleate (16:1n7)
88	7	137795206	rs10228704	AKR1D1		T	-0.148	0.018	5.19e-16	etiocholanolone glucuronide		Bile acid synthesis defect, congenital, 2, 235555 (3), Autosomal recessive
113	11	61596633	rs99780	FADS2		T	-0.13	0.016	5.12e-16	1-palmitoyl-2-arachidonoyl-GPI (16:0/20:4)*
70	6	25759066	rs12212049	SLC17A4		T	-0.129	0.016	4.87e-16	xanthurenate
39	3	52212054	rs190202562	POC1A		T	1.624	0.2	4.8e-16	N-formylmethionine		Short stature, onychodysplasia, facial dysmorphism, and hypotrichosis, 614813 (3), Autosomal recessive
117	11	116623213	rs1223100496	BUD13		TA	0.179	0.022	4.5e-16	diacylglycerol (16:1/18:2 [2], 16:0/18:3 [1])*
38	3	45765132	rs73058498	SACM1L		G	-0.212	0.026	4.48e-16	X - 11315
69	6	10997166	rs9295741	ELOVL2		T	-0.121	0.015	4.43e-16	1-palmitoyl-2-docosahexaenoyl-GPC (16:0/22:6)
54	4	95508755	rs12642449	PDLIM5	3_prime_UTR_variant	T	-0.117	0.014	4.23e-16	X - 24699	Yes
55	4	98193271	rs187047586	NA		A	-1.03	0.126	4.22e-16	gluconate	Yes
137	14	73997195	chr14:73997195	HEATR4		<CN0>	0.125	0.015	3.79e-16	X - 24748
184	19	49206674	rs601338	FUT2		A	0.118	0.014	3.69e-16	X - 11308		Bombay phenotype (3); Norwalk virus infection, resistance to (3); Vitamin B12 plasma level QTL1, 612542 (3)
40	3	56849749	rs1354034	ARHGEF3		T	-0.131	0.016	3.65e-16	spermidine	Yes
114	11	67354986	rs640777	GSTP1		T	0.121	0.015	3.64e-16	N-acetylglycine
81	7	48118860	rs369281976	UPP1		AT	0.122	0.015	2.78e-16	5-methyluridine (ribothymidine)	Yes
183	19	45412079	rs7412	APOE	missense_variant	T	-0.216	0.026	2.77e-16	sphingomyelin (d18:2/23:0, d18:1/23:1, d17:1/24:1)*		Alzheimer disease-2, 104310 (3), Autosomal dominant; Coronary artery disease, severe, susceptibility to, 617347 (3); Hyperlipoproteinemia, type III, 617347 (3); Lipoprotein glomerulopathy, 611771 (3); ?Macular degeneration, age-related, 603075 (3), Autosomal dominant; Sea-blue histiocyte disease, 269600 (3), Autosomal recessive
59	4	159621185	rs6856561	ETFDH		T	-0.137	0.017	2.71e-16	laurylcarnitine		Glutaric acidemia IIC, 231680 (3), Autosomal recessive
114	11	67191755	rs578222450	CARNS1	missense_variant	T	-0.375	0.046	2.7e-16	X - 24513
69	6	10997166	rs9295741	ELOVL2		T	0.124	0.015	2.65e-16	1-stearoyl-2-docosapentaenoyl-GPC (18:0/22:5n3)*
65	5	131716128	rs34052176	SLC22A5		CT	0.126	0.015	2.59e-16	oleoylcarnitine		Carnitine deficiency, systemic primary, 212140 (3), Autosomal recessive
184	19	48383197	chr19:48383197	SULT2A1		TA	-0.158	0.019	2.33e-16	21-hydroxypregnenolone disulfate
65	5	131467589	rs143746337	CSF2		C	-1.147	0.14	2.3e-16	acetylcarnitine
146	15	58722590	rs35980001	LIPC		GC	0.151	0.018	2.08e-16	1-arachidonoyl-GPE (20:4n6)*		Diabetes mellitus, noninsulin-dependent, 125853 (3), Autosomal dominant; Hepatic lipase deficiency, 614025 (3), Autosomal recessive; High density lipoprotein cholesterol level QTL 12, 612797 (3)
52	4	69349018	rs1117816	TMPRSS11E		C	0.128	0.016	2.07e-16	androsterone glucuronide
48	3	195942080	rs5855544	ZDHHC19		T	0.125	0.015	1.99e-16	4-androsten-3beta,17beta-diol monosulfate (2)
104	10	61467182	rs1171617	SLC16A9		G	-0.15	0.018	1.89e-16	X - 11261
38	3	45814094	rs17279437	SLC6A20	missense_variant	A	0.202	0.025	1.88e-16	trigonelline (N'-methylnicotinate)		Hyperglycinuria, 138500 (3), Autosomal dominant; Iminoglycinuria, digenic, 242600 (3), Autosomal recessive, Digenic recessive
40	3	56849749	rs1354034	ARHGEF3		T	-0.127	0.015	1.79e-16	sphingosine	Yes
100	10	5245196	rs74827952	AKR1C4		A	0.16	0.019	1.54e-16	pregnenolone sulfate		46XY sex reversal 8, modifier of, 614279 (3), Autosomal recessive
135	14	64239629	rs12878001	SGPP1		G	0.164	0.02	1.48e-16	stearoyl sphingomyelin (d18:1/18:0)
93	8	27394334	rs71553864	EPHX2	inframe_insertion	AGTC	0.281	0.034	1.45e-16	X - 24748		Hypercholesterolemia, familial, due to LDLR defect, modifier of, 143890 (3), Autosomal dominant
192	21	44478393	rs6586281	CBS		A	0.156	0.019	1.31e-16	betaine		Homocystinuria, B6-responsive and nonresponsive types, 236200 (3), Autosomal recessive; Thrombosis, hyperhomocysteinemic, 236200 (3), Autosomal recessive
193	22	19951271	rs4680	COMT	missense_variant	G	0.121	0.015	1.14e-16	3-methoxytyrosine		Panic disorder, susceptibility to, 167870 (3), ?Autosomal dominant; Schizophrenia, susceptibility to, 181500 (3), Autosomal dominant
156	16	56993324	rs3764261	CETP		A	0.138	0.017	1.13e-16	1-palmityl-2-palmitoyl-GPC (O-16:0/16:0)*		High density lipoprotein cholesterol level QTL 10, 143470 (3), Autosomal dominant; Hyperalphalipoproteinemia, 143470 (3), Autosomal dominant
156	16	56998918	rs12720926	CETP		G	0.124	0.015	1.06e-16	1-(1-enyl-stearoyl)-2-oleoyl-GPC (P-18:0/18:1)		High density lipoprotein cholesterol level QTL 10, 143470 (3), Autosomal dominant; Hyperalphalipoproteinemia, 143470 (3), Autosomal dominant
148	15	76536164	rs71140202	ETFA		A	0.193	0.023	9.76e-17	butyrylcarnitine		Glutaric acidemia IIA, 231680 (3), Autosomal recessive
65	5	131623358	rs7705189	SLC22A4		G	-0.122	0.015	8.35e-17	myristoylcarnitine		Rheumatoid arthritis, susceptibility to, 180300 (3)
104	10	61468589	rs1171616	SLC16A9		G	-0.149	0.018	8.3e-17	N-methylproline
156	16	56996211	rs711752	CETP		A	0.122	0.015	6.06e-17	1-(1-enyl-palmitoyl)-2-oleoyl-GPC (P-16:0/18:1)*		High density lipoprotein cholesterol level QTL 10, 143470 (3), Autosomal dominant; Hyperalphalipoproteinemia, 143470 (3), Autosomal dominant
157	16	58800910	chr16:58800910	GOT2		C	0.217	0.026	5.64e-17	indolelactate
52	4	69310287	rs35111362	TMPRSS11E		C	-0.127	0.015	5.61e-17	epiandrosterone sulfate
105	10	96561988	rs113546720	CYP2C19		A	0.262	0.031	5.53e-17	thymol sulfate		Clopidogrel, impaired responsiveness to, 609535 (3), Autosomal recessive; Mephenytoin poor metabolizer, 609535 (3), Autosomal recessive; Omeprazole poor metabolizer, 609535 (3), Autosomal recessive; Proguanil poor metabolizer, 609535 (3), Autosomal recessive
183	19	45412079	rs7412	APOE	missense_variant	T	-0.225	0.027	5.28e-17	sphingomyelin (d18:1/22:1, d18:2/22:0, d16:1/24:1)*		Alzheimer disease-2, 104310 (3), Autosomal dominant; Coronary artery disease, severe, susceptibility to, 617347 (3); Hyperlipoproteinemia, type III, 617347 (3); Lipoprotein glomerulopathy, 611771 (3); ?Macular degeneration, age-related, 603075 (3), Autosomal dominant; Sea-blue histiocyte disease, 269600 (3), Autosomal recessive
78	6	160560880	chr6:160560880	SLC22A1		C	-0.16	0.019	5.18e-17	2-oxoarginine*
117	11	116623213	rs1223100496	BUD13		TA	0.179	0.021	5.17e-17	palmitoyl-linoleoyl-glycerol (16:0/18:2) [2]*
183	19	45412079	rs7412	APOE	missense_variant	T	-0.228	0.027	5.12e-17	palmitoyl sphingomyelin (d18:1/16:0)		Alzheimer disease-2, 104310 (3), Autosomal dominant; Coronary artery disease, severe, susceptibility to, 617347 (3); Hyperlipoproteinemia, type III, 617347 (3); Lipoprotein glomerulopathy, 611771 (3); ?Macular degeneration, age-related, 603075 (3), Autosomal dominant; Sea-blue histiocyte disease, 269600 (3), Autosomal recessive
114	11	67411420	rs2514032	ACY3		T	0.163	0.019	4.57e-17	5-bromotryptophan
156	16	56990716	rs247617	CETP		A	0.131	0.016	4.46e-17	1-palmityl-2-oleoyl-GPC (O-16:0/18:1)*		High density lipoprotein cholesterol level QTL 10, 143470 (3), Autosomal dominant; Hyperalphalipoproteinemia, 143470 (3), Autosomal dominant
38	3	45814094	rs17279437	SLC6A20	missense_variant	A	0.227	0.027	4.09e-17	N,N-dimethylalanine		Hyperglycinuria, 138500 (3), Autosomal dominant; Iminoglycinuria, digenic, 242600 (3), Autosomal recessive, Digenic recessive
17	1	151879761	rs28415528	THEM4		A	-0.145	0.017	3.52e-17	3-hydroxyoctanoate
31	2	211540507	rs1047891	CPS1	missense_variant	A	-0.119	0.014	3.49e-17	pyroglutamine*		Carbamoylphosphate synthetase I deficiency, 237300 (3), Autosomal recessive; Pulmonary hypertension, neonatal, susceptibility to, 615371 (3); Venoocclusive disease after bone marrow transplantation (3)
39	3	52212054	rs190202562	POC1A		T	1.712	0.203	3.33e-17	N-acetylmethionine		Short stature, onychodysplasia, facial dysmorphism, and hypotrichosis, 614813 (3), Autosomal recessive
123	12	21361213	rs73063122	SLCO1B1		C	0.154	0.018	3.24e-17	4-androsten-3alpha,17alpha-diol monosulfate (3)		Hyperbilirubinemia, Rotor type, digenic, 237450 (3), Digenic recessive
168	17	37648140	rs12942352	CDK12		G	0.14	0.017	3.22e-17	1-methylhistidine
123	12	21347021	rs12367888	SLCO1B1		T	0.177	0.021	2.61e-17	1-arachidonoyl-GPI (20:4)*		Hyperbilirubinemia, Rotor type, digenic, 237450 (3), Digenic recessive
108	10	118394551	rs2286779	PNLIPRP2		G	-0.127	0.015	2.02e-17	X - 17654
149	15	78559807	rs71148512	DNAJA4		GT	-0.13	0.015	1.92e-17	orotate	Yes
183	19	45412079	rs7412	APOE	missense_variant	T	-0.23	0.027	1.91e-17	sphingomyelin (d18:1/21:0, d17:1/22:0, d16:1/23:0)*		Alzheimer disease-2, 104310 (3), Autosomal dominant; Coronary artery disease, severe, susceptibility to, 617347 (3); Hyperlipoproteinemia, type III, 617347 (3); Lipoprotein glomerulopathy, 611771 (3); ?Macular degeneration, age-related, 603075 (3), Autosomal dominant; Sea-blue histiocyte disease, 269600 (3), Autosomal recessive
70	6	25824809	rs9467618	SLC17A1		T	0.144	0.017	1.52e-17	5alpha-androstan-3alpha,17beta-diol monosulfate (1)
104	10	61465838	rs1171619	SLC16A9		A	-0.162	0.019	1.41e-17	N-acetylarginine
66	5	138717277	rs72552254	SLC23A1		G	-0.346	0.04	9.95e-18	oxalate (ethanedioate)	Yes
70	6	25792292	rs942377	SLC17A1		C	0.152	0.018	9.72e-18	X - 12847
113	11	61564299	rs4246215	FEN1	3_prime_UTR_variant	T	-0.134	0.016	9.68e-18	docosapentaenoate (n3 DPA; 22:5n3)
70	6	25879539	rs487624	SLC17A3		A	-0.127	0.015	9.18e-18	3-methoxytyrosine		Gout susceptibility 4, 612671 (3), Autosomal dominant; Uric acid concentration, serum, QTL4, 612671 (3), Autosomal dominant
148	15	76537476	rs77387260	ETFA		T	0.221	0.026	8.78e-18	ethylmalonate		Glutaric acidemia IIA, 231680 (3), Autosomal recessive
146	15	58683366	rs1532085	LIPC		A	0.132	0.015	8.7e-18	2-stearoyl-GPE (18:0)*		Diabetes mellitus, noninsulin-dependent, 125853 (3), Autosomal dominant; Hepatic lipase deficiency, 614025 (3), Autosomal recessive; High density lipoprotein cholesterol level QTL 12, 612797 (3)
113	11	61569830	rs174546	FADS1	3_prime_UTR_variant	T	0.137	0.016	8.31e-18	1-linoleoyl-GPI (18:2)*
70	6	25817789	rs1165153	SLC17A1		A	0.125	0.014	7.06e-18	3-carboxy-4-methyl-5-propyl-2-furanpropanoate (CMPF)
65	5	131629165	rs162887	SLC22A4		A	0.14	0.016	7.02e-18	palmitoylcarnitine		Rheumatoid arthritis, susceptibility to, 180300 (3)
113	11	61609750	rs174583	FADS2		T	0.137	0.016	5.23e-18	1-(1-enyl-stearoyl)-2-linoleoyl-GPE (P-18:0/18:2)*
105	10	96824406	rs11572093	CYP2C8		T	0.141	0.016	5.16e-18	3-carboxy-4-methyl-5-pentyl-2-furanpropionate (3-CMPFP)**		Rhabdomyolysis, cerivastatin-induced (3)
52	4	69532128	rs1531022	UGT2B17		A	-0.126	0.015	5.06e-18	vanillylmandelate (VMA)		Bone mineral density QTL 12, osteoporosis, 612560 (3)
88	7	137784790	rs13243992	AKR1D1		C	-0.144	0.017	4.89e-18	X - 15492		Bile acid synthesis defect, congenital, 2, 235555 (3), Autosomal recessive
113	11	62882727	rs113939203	SLC22A24		A	0.26	0.03	4.4e-18	X - 12844
48	3	195942080	rs5855544	ZDHHC19		T	0.14	0.016	3.71e-18	5alpha-androstan-3beta,17alpha-diol disulfate
123	12	21386493	rs11045886	SLCO1B1		C	0.172	0.02	3.34e-18	X - 11372		Hyperbilirubinemia, Rotor type, digenic, 237450 (3), Digenic recessive
113	11	61556039	rs61896141	MYRF		C	0.173	0.02	2.88e-18	dihomo-linolenate (20:3n3 or n6)
87	7	122834735	rs188136743	SLC13A1		A	-1.481	0.169	2.45e-18	sulfate*	Yes
105	10	96845842	chr10:96845842	CYP2C8		T	-0.139	0.016	2.39e-18	16a-hydroxy DHEA 3-sulfate		Rhabdomyolysis, cerivastatin-induced (3)
75	6	111569151	rs12192718	SLC16A10		A	0.179	0.02	2.32e-18	tyrosine
198	23	2852951	rs11222	ARSE	synonymous_variant	G	-0.118	0.013	2.08e-18	X - 12847	Yes	Chondrodysplasia punctata, X-linked recessive, 302950 (3), X-linked recessive
184	19	48374320	rs112285002	SULT2A1	3_prime_UTR_variant	T	-0.187	0.021	2.06e-18	lithocholate sulfate (1)
70	6	25817789	rs1165153	SLC17A1		A	0.124	0.014	1.95e-18	21-hydroxypregnenolone disulfate
186	19	55739813	rs10419308	TMEM86B		A	-0.168	0.019	1.91e-18	1-(1-enyl-palmitoyl)-2-linoleoyl-GPE (P-16:0/18:2)*	Yes
70	6	25815210	rs201891384	SLC17A1		GTC	-0.142	0.016	1.84e-18	5-bromotryptophan
123	12	21380630	rs4149083	SLCO1B1		T	0.184	0.021	1.58e-18	bilirubin (E,Z or Z,E)*		Hyperbilirubinemia, Rotor type, digenic, 237450 (3), Digenic recessive
105	10	95360964	rs10882283	RBP4	5_prime_UTR_variant	C	-0.134	0.015	1.57e-18	retinol (Vitamin A)		Microphthalmia, isolated, with coloboma 10, 616428 (3), Autosomal dominant; Retinal dystrophy, iris coloboma, and comedogenic acne syndrome, 615147 (3), Autosomal recessive
123	12	21347021	rs12367888	SLCO1B1		T	0.182	0.021	1.45e-18	eicosanodioate		Hyperbilirubinemia, Rotor type, digenic, 237450 (3), Digenic recessive
39	3	52212054	rs190202562	POC1A		T	1.765	0.2	1.44e-18	N-acetylserine		Short stature, onychodysplasia, facial dysmorphism, and hypotrichosis, 614813 (3), Autosomal recessive
104	10	61468589	rs1171616	SLC16A9		G	-0.156	0.018	1.34e-18	hexanoylcarnitine
5	1	47399967	rs28451040	CYP4A11	missense_variant	A	-0.162	0.018	1.22e-18	dodecanedioate
82	7	50620030	rs6975312	DDC		A	0.513	0.058	1.01e-18	3-methoxytyrosine		Aromatic L-amino acid decarboxylase deficiency, 608643 (3), Autosomal recessive
113	11	61603510	rs174576	FADS2		A	-0.138	0.016	8.95e-19	1-stearoyl-2-docosapentaenoyl-GPC (18:0/22:5n3)*
113	11	61542006	rs1219849860	MYRF		G	-0.138	0.016	8.67e-19	1-palmitoyl-2-docosahexaenoyl-GPC (16:0/22:6)
113	11	61593816	rs174568	FADS2		T	-0.142	0.016	8.48e-19	1-(1-enyl-palmitoyl)-GPC (P-16:0)*
128	12	122388396	rs1667584	WDR66		A	0.204	0.023	8.27e-19	4-hydroxyphenylpyruvate
112	11	27147008	rs891532338	BBOX1		G	0.321	0.036	8.19e-19	deoxycarnitine	Yes
117	11	116648917	rs964184	ZPR1	3_prime_UTR_variant	G	0.205	0.023	7.28e-19	linoleoyl-linoleoyl-glycerol (18:2/18:2) [1]*
188	20	12958687	rs438568	SPTLC3		A	0.134	0.015	6.88e-19	N-stearoyl-sphingosine (d18:1/18:0)*
62	5	35989806	rs13358334	UGT3A1		T	0.189	0.021	4.18e-19	5alpha-pregnan-3beta,20alpha-diol monosulfate (2)
113	11	61596322	chr11:61596322	FADS2		C	-0.153	0.017	4.15e-19	1-(1-enyl-stearoyl)-GPC (P-18:0) *
95	8	144690886	rs10097337	PYCRL		A	-0.145	0.016	3.97e-19	X - 11315
199	23	6827042	rs7471907	HDHD1		T	-0.096	0.011	3.94e-19	pregn steroid monosulfate*	Yes
8	1	63042738	rs10789116	DOCK7		G	-0.139	0.015	2.97e-19	1-stearoyl-2-linoleoyl-GPI (18:0/18:2)		Epileptic encephalopathy, early infantile, 23, 615859 (3), Autosomal recessive
104	10	61462114	rs72815843	SLC16A9		A	-0.187	0.021	2.7e-19	N,N-dimethylalanine
5	1	47364062	rs59428107	CYP4A11		G	-0.189	0.021	2.62e-19	21-hydroxypregnenolone disulfate
163	16	89699664	rs4785581	DPEP1		A	-0.148	0.016	2.45e-19	isoleucylleucine/leucylisoleucine
15	1	119923531	rs2224995	HAO2		A	-0.13	0.014	2.33e-19	2-hydroxy-3-methylvalerate
176	19	8277517	rs12610227	CERS4		A	-0.131	0.015	2.22e-19	glycosyl-N-stearoyl-sphingosine (d18:1/18:0)
197	22	50964153	rs131805	SCO2		T	0.163	0.018	1.44e-19	uridine		Cardioencephalomyopathy, fatal infantile, due to cytochrome c oxidase deficiency 1, 604377 (3), Autosomal recessive; Myopia 6, 608908 (3), Autosomal dominant
156	16	56990716	rs247617	CETP		A	0.137	0.015	1.26e-19	1-(1-enyl-palmitoyl)-2-palmitoleoyl-GPC (P-16:0/16:1)*		High density lipoprotein cholesterol level QTL 10, 143470 (3), Autosomal dominant; Hyperalphalipoproteinemia, 143470 (3), Autosomal dominant
22	1	241713402	rs61825638	KMO		T	-0.156	0.017	1.21e-19	quinolinate	Yes
52	4	69340991	rs4860948	TMPRSS11E		A	0.157	0.017	1.17e-19	etiocholanolone glucuronide
25	2	32515337	rs72798731	YIPF4		T	-0.332	0.036	1.12e-19	androsterone glucuronide
123	12	21352541	rs12317268	SLCO1B1		G	0.187	0.021	1.12e-19	pregnanediol-3-glucuronide		Hyperbilirubinemia, Rotor type, digenic, 237450 (3), Digenic recessive
113	11	61588305	rs174564	FADS2		G	-0.152	0.017	1.09e-19	adrenate (22:4n6)
183	19	45418790	rs5117	APOC1		C	0.172	0.019	1.02e-19	linoleoyl-arachidonoyl-glycerol (18:2/20:4) [2]*
78	6	160564476	rs662138	SLC22A1		G	-0.164	0.018	1e-19	propionylcarnitine
106	10	102075479	rs603424	PKD2L1		A	-0.184	0.02	7.94e-20	decadienedioic acid (C10:2-DC)**
5	1	47398496	rs1126742	CYP4A11	missense_variant	G	0.197	0.022	7.81e-20	X - 24748
65	5	131716128	rs34052176	SLC22A5		CT	0.139	0.015	7.21e-20	linoleoylcarnitine*		Carnitine deficiency, systemic primary, 212140 (3), Autosomal recessive
68	6	3144160	rs13204642	BPHL		C	-0.345	0.038	5.68e-20	X - 17676
65	5	131664529	rs1204553744	SLC22A4		T	0.133	0.014	5.52e-20	stearoylcarnitine		Rheumatoid arthritis, susceptibility to, 180300 (3)
113	11	61588305	rs174564	FADS2		G	0.148	0.016	5.52e-20	1-palmitoyl-2-linoleoyl-GPI (16:0/18:2)
104	10	61469538	rs1171614	SLC16A9	5_prime_UTR_variant	T	-0.158	0.017	5.4e-20	X - 11381
70	6	25824809	rs9467618	SLC17A1		T	0.147	0.016	5.35e-20	epiandrosterone sulfate
41	3	67425963	rs115560420	SUCLG2	3_prime_UTR_variant	T	0.215	0.023	4.67e-20	succinylcarnitine
113	11	61609750	rs174583	FADS2		T	0.145	0.016	4.05e-20	1-(1-enyl-palmitoyl)-2-linoleoyl-GPE (P-16:0/18:2)*
182	19	41353107	rs56113850	CYP2A6		T	-0.139	0.015	3.95e-20	X - 12216		Coumarin resistance, 122700 (3), Autosomal dominant; Lung cancer, resistance to, 211980 (3), Autosomal recessive; Nicotine addiction, protection from, 188890 (3)
25	2	32308917	rs72796853	SPAST		T	-0.351	0.038	3.72e-20	11beta-hydroxyandrosterone glucuronide		Spastic paraplegia 4, autosomal dominant, 182601 (3), Autosomal dominant
5	1	47395347	rs11211405	CYP4A11	3_prime_UTR_variant	T	-0.207	0.022	3.56e-20	tetradecanedioate
48	3	195942487	rs2342307	ZDHHC19		A	0.128	0.014	2.93e-20	5alpha-androstan-3beta,17beta-diol disulfate
59	4	159648596	rs55936281	PPID		T	-0.155	0.017	2.3e-20	cis-4-decenoyl carnitine
105	10	96824738	rs7098376	CYP2C8		T	-0.157	0.017	2.18e-20	andro steroid monosulfate (1)*		Rhabdomyolysis, cerivastatin-induced (3)
113	11	61596633	rs99780	FADS2		T	-0.146	0.016	1.87e-20	1-arachidonoyl-GPI (20:4)*
176	19	8290878	rs8105664	CERS4		A	-0.172	0.018	1.65e-20	N-stearoyl-sphingosine (d18:1/18:0)*
183	19	45412079	rs7412	APOE	missense_variant	T	-0.256	0.028	1.61e-20	behenoyl sphingomyelin (d18:1/22:0)*		Alzheimer disease-2, 104310 (3), Autosomal dominant; Coronary artery disease, severe, susceptibility to, 617347 (3); Hyperlipoproteinemia, type III, 617347 (3); Lipoprotein glomerulopathy, 611771 (3); ?Macular degeneration, age-related, 603075 (3), Autosomal dominant; Sea-blue histiocyte disease, 269600 (3), Autosomal recessive
146	15	58679668	rs7350789	LIPC		A	0.141	0.015	1.53e-20	1-docosahexaenoyl-GPE (22:6)*		Diabetes mellitus, noninsulin-dependent, 125853 (3), Autosomal dominant; Hepatic lipase deficiency, 614025 (3), Autosomal recessive; High density lipoprotein cholesterol level QTL 12, 612797 (3)
34	2	234626287	rs869283	UGT1A8		A	-0.142	0.015	1.41e-20	X - 11880
184	19	48389363	rs296361	SULT2A1		A	-0.196	0.021	1.33e-20	glycodeoxycholate sulfate
171	17	80190771	rs35121878	SLC16A3		C	-0.133	0.014	1.29e-20	3-(4-hydroxyphenyl)lactate
114	11	67191755	rs578222450	CARNS1	missense_variant	T	-0.419	0.045	1.21e-20	X - 21658
172	18	680520	rs7239738	ENOSF1		C	-0.167	0.018	1.1e-20	arabonate/xylonate	Yes
121	12	348876	rs10774020	SLC6A13		T	-0.151	0.016	1.05e-20	1-ribosyl-imidazoleacetate*
150	15	85504753	rs111460093	SLC28A1		C	-0.326	0.035	9.95e-21	cytidine	Yes
62	5	35990313	rs12656482	UGT3A1		T	0.196	0.021	9.05e-21	5alpha-pregnan-3beta,20alpha-diol disulfate
10	1	76135946	rs7552404	SLC44A5		G	-0.155	0.016	7.48e-21	X - 18921
131	13	103718308	rs55971546	SLC10A2	missense_variant	T	0.347	0.037	6.34e-21	glycochenodeoxycholate sulfate	Yes	Bile acid malabsorption, primary, 613291 (3), Autosomal recessive
183	19	45416741	rs438811	TOMM40		T	0.164	0.017	5.9e-21	oleoyl-arachidonoyl-glycerol (18:1/20:4) [2]*
62	5	35990313	rs12656482	UGT3A1		T	0.185	0.02	4.96e-21	pregnen-diol disulfate*
152	16	15130351	rs1741	PDXDC1	3_prime_UTR_variant	C	-0.154	0.016	4.83e-21	1-dihomo-linolenoyl-GPC (20:3n3 or 6)*
163	16	89682125	rs8044136	DPEP1		G	0.148	0.016	3.62e-21	cysteinylglycine
183	19	45416741	rs438811	TOMM40		T	0.167	0.018	3.46e-21	linoleoyl-arachidonoyl-glycerol (18:2/20:4) [1]*
86	7	99332948	rs45446698	CYP3A5		G	-0.366	0.039	2.91e-21	etiocholanolone glucuronide		Hypertension, salt-sensitive essential, susceptibility to, 145500 (3), Multifactorial
97	9	131574969	rs71497415	TBC1D13		T	-0.147	0.015	2.24e-21	indolelactate
83	7	56076598	rs6951810	GBAS		T	-0.162	0.017	1.88e-21	serine
101	10	12133252	rs7094385	DHTKD1		G	0.176	0.018	1.68e-21	1-methyl-5-imidazoleacetate	Yes	2-aminoadipic 2-oxoadipic aciduria, 204750 (3), Autosomal recessive; ?Charcot-Marie-Tooth disease, axonal, type 2Q, 615025 (3), Autosomal dominant
25	2	31805826	rs9282858	SRD5A2	missense_variant	T	0.395	0.041	1.48e-21	etiocholanolone glucuronide		Pseudovaginal perineoscrotal hypospadias, 264600 (3), Autosomal recessive
34	2	234580678	rs72551330	UGT1A8	missense_variant	C	0.69	0.072	1.42e-21	3-carboxy-4-methyl-5-pentyl-2-furanpropionate (3-CMPFP)**
158	16	68351859	rs7199750	PRMT7		C	-0.15	0.016	1.39e-21	N6,N6,N6-trimethyllysine		Short stature, brachydactyly, intellectual developmental disability, and seizures, 617157 (3), Autosomal recessive
183	19	45412079	rs7412	APOE	missense_variant	T	-0.261	0.027	1.36e-21	sphingomyelin (d18:1/20:0, d16:1/22:0)*		Alzheimer disease-2, 104310 (3), Autosomal dominant; Coronary artery disease, severe, susceptibility to, 617347 (3); Hyperlipoproteinemia, type III, 617347 (3); Lipoprotein glomerulopathy, 611771 (3); ?Macular degeneration, age-related, 603075 (3), Autosomal dominant; Sea-blue histiocyte disease, 269600 (3), Autosomal recessive
105	10	96714647	rs924022773	CYP2C9		T	0.285	0.03	1.26e-21	X - 21258		Tolbutamide poor metabolizer (3); Warfarin sensitivity, 122700 (3), Autosomal dominant
21	1	219360899	rs6701914	LYPLAL1		A	0.223	0.023	1.14e-21	ethylmalonate	Yes
113	11	61596633	rs99780	FADS2		T	-0.152	0.016	1.09e-21	1-stearoyl-2-arachidonoyl-GPE (18:0/20:4)
48	3	195942080	rs5855544	ZDHHC19		T	0.149	0.016	1.03e-21	5alpha-androstan-3beta,17beta-diol monosulfate (2)
157	16	58767848	rs12921667	GOT2		A	0.279	0.029	7.35e-22	X - 13684
156	16	56993161	rs12149545	CETP		A	0.154	0.016	7.15e-22	1-(1-enyl-palmitoyl)-2-palmitoyl-GPC (P-16:0/16:0)*		High density lipoprotein cholesterol level QTL 10, 143470 (3), Autosomal dominant; Hyperalphalipoproteinemia, 143470 (3), Autosomal dominant
5	1	47398496	rs1126742	CYP4A11	missense_variant	G	0.207	0.021	6.34e-22	X - 18899
123	12	21386493	rs11045886	SLCO1B1		C	0.193	0.02	6.27e-22	X - 11880		Hyperbilirubinemia, Rotor type, digenic, 237450 (3), Digenic recessive
110	11	2203154	rs11043003	TH		C	0.164	0.017	3.89e-22	3-methoxytyrosine	Yes	Segawa syndrome, recessive, 605407 (3), Autosomal recessive
188	20	12959885	rs1321940	SPTLC3		A	0.145	0.015	3.79e-22	sphingomyelin (d18:1/21:0, d17:1/22:0, d16:1/23:0)*
70	6	25824809	rs9467618	SLC17A1		T	0.157	0.016	3.75e-22	androsterone sulfate
113	11	61549025	rs174533	MYRF		A	-0.153	0.016	3.75e-22	stearidonate (18:4n3)
8	1	62929378	rs532562617	DOCK7		T	-0.153	0.016	3.73e-22	1-stearoyl-2-arachidonoyl-GPI (18:0/20:4)		Epileptic encephalopathy, early infantile, 23, 615859 (3), Autosomal recessive
70	6	32136547	rs1061808	PPT2,EGFL8,AGPAT1	3_prime_UTR_variant	T	-0.149	0.015	3.52e-22	1,2-dipalmitoyl-GPC (16:0/16:0)
135	14	64233720	rs8008070	SGPP1		T	0.193	0.02	2.36e-22	sphingomyelin (d18:1/17:0, d17:1/18:0, d19:1/16:0)
48	3	195942080	rs5855544	ZDHHC19		T	0.141	0.014	2.08e-22	androsterone sulfate
195	22	36856588	rs74277082	TXN2		T	0.274	0.028	1.84e-22	5-bromotryptophan	Yes	Combined oxidative phosphorylation deficiency 29, 616811 (3), Autosomal recessive
61	5	1193229	rs111306756	SLC6A19		T	0.158	0.016	1.81e-22	1-methylhistidine		Hartnup disorder, 234500 (3), Autosomal recessive; Hyperglycinuria, 138500 (3), Autosomal dominant; Iminoglycinuria, digenic, 242600 (3), Autosomal recessive, Digenic recessive
137	14	74096048	rs72719670	ACOT6		C	0.17	0.017	1.39e-22	X - 11308
155	16	30351825	rs536141234	CD2BP2		T	-0.553	0.056	1.32e-22	ascorbic acid 3-sulfate*	Yes
117	11	116648917	rs964184	ZPR1	3_prime_UTR_variant	G	0.214	0.022	9.13e-23	oleoyl-oleoyl-glycerol (18:1/18:1) [2]*
111	11	18317458	rs2305564	HPS5		T	-0.148	0.015	7.99e-23	imidazole lactate		Hermansky-Pudlak syndrome 5, 614074 (3), Autosomal recessive
104	10	61467182	rs1171617	SLC16A9		G	-0.16	0.016	7.8e-23	deoxycarnitine
48	3	195942080	rs5855544	ZDHHC19		T	0.149	0.015	6.41e-23	5alpha-androstan-3alpha,17beta-diol monosulfate (1)
136	14	67964688	rs12878807	TMEM229B		A	-0.15	0.015	5.99e-23	1-(1-enyl-palmitoyl)-2-myristoyl-GPC (P-16:0/14:0)*
184	19	48389363	rs296361	SULT2A1		A	-0.197	0.02	5.53e-23	5alpha-pregnan-3beta,20alpha-diol disulfate
101	10	12146858	rs9424148	DHTKD1		C	0.184	0.019	4.13e-23	1-ribosyl-imidazoleacetate*	Yes	2-aminoadipic 2-oxoadipic aciduria, 204750 (3), Autosomal recessive; ?Charcot-Marie-Tooth disease, axonal, type 2Q, 615025 (3), Autosomal dominant
78	6	160578860	rs1564348	SLC22A1		C	-0.189	0.019	2.57e-23	betaine
170	17	73911715	rs9891076	FBF1		T	-0.159	0.016	2.52e-23	X - 24309
34	2	234673309	rs4148325	UGT1A8		T	0.169	0.017	2.27e-23	xanthurenate
48	3	195942080	rs5855544	ZDHHC19		T	0.145	0.015	2.25e-23	16a-hydroxy DHEA 3-sulfate
97	9	130477160	rs550045	PTRH1		G	0.147	0.015	2.15e-23	N-formylmethionine
78	6	160564476	rs662138	SLC22A1		G	-0.189	0.019	1.77e-23	butyrylcarnitine
133	14	55357771	rs8003903	GCH1		T	-0.23	0.023	1.51e-23	3-methoxytyrosine	Yes	Dystonia, DOPA-responsive, with or without hyperphenylalaninemia, 128230 (3), Autosomal recessive, Autosomal dominant; Hyperphenylalaninemia, BH4-deficient, B, 233910 (3), Autosomal recessive
40	3	56849749	rs1354034	ARHGEF3		T	-0.153	0.015	1.15e-23	N-acetylneuraminate	Yes
10	1	76190926	chr1:76190926	ACADM		G	0.159	0.016	1.11e-23	X - 12101		Acyl-CoA dehydrogenase, medium chain, deficiency of, 201450 (3), Autosomal recessive
65	5	131675046	rs272874	SLC22A4		C	0.159	0.016	1.09e-23	homostachydrine*		Rheumatoid arthritis, susceptibility to, 180300 (3)
79	6	167709702	rs2235197	UNC93A	missense_variant	A	0.293	0.029	1.01e-23	N-acetylglucosamine/N-acetylgalactosamine	Yes
77	6	131896704	rs74451798	ARG1		G	-0.555	0.055	7.43e-24	arginine		Argininemia, 207800 (3), Autosomal recessive
123	12	21414585	chr12:21414585	SLCO1A2		A	0.222	0.022	6.79e-24	lithocholate sulfate (1)
158	16	68317636	rs3961283	SLC7A6		G	-0.169	0.017	5.21e-24	lysine
47	3	182819049	rs6443851	MCCC1		A	0.156	0.015	4.98e-24	beta-hydroxyisovalerate		3-Methylcrotonyl-CoA carboxylase 1 deficiency, 210200 (3), Autosomal recessive
104	10	61468589	rs1171616	SLC16A9		G	-0.18	0.018	4.59e-24	butyrylcarnitine
123	12	21379980	rs58487503	SLCO1B1		A	0.208	0.02	3.18e-24	X - 17654		Hyperbilirubinemia, Rotor type, digenic, 237450 (3), Digenic recessive
197	22	50665863	rs142384028	TUBGCP6		T	0.576	0.057	3.16e-24	X - 24020		Microcephaly and chorioretinopathy, autosomal recessive, 1, 251270 (3), Autosomal recessive
182	19	41353107	rs56113850	CYP2A6		T	-0.155	0.015	2.15e-24	3-methylxanthine		Coumarin resistance, 122700 (3), Autosomal dominant; Lung cancer, resistance to, 211980 (3), Autosomal recessive; Nicotine addiction, protection from, 188890 (3)
123	12	21352541	rs12317268	SLCO1B1		G	-0.214	0.021	1.84e-24	4-androsten-3beta,17beta-diol monosulfate (2)		Hyperbilirubinemia, Rotor type, digenic, 237450 (3), Digenic recessive
163	16	89141490	rs72817412	ACSF3		T	0.355	0.035	1.71e-24	ethylmalonate		Combined malonic and methylmalonic aciduria, 614265 (3)
35	2	242699504	rs62192033	D2HGDH		G	0.162	0.016	1.38e-24	2-hydroxyglutarate		D-2-hydroxyglutaric aciduria, 600721 (3), Autosomal recessive
106	10	102075479	rs603424	PKD2L1		A	-0.198	0.019	1.31e-24	1-palmitoleoyl-GPC (16:1)*
126	12	103242396	rs1718309	PAH		A	0.155	0.015	1.15e-24	phenylalanine		Hyperphenylalaninemia, non-PKU mild, 261600 (3), Autosomal recessive; Phenylketonuria, 261600 (3), Autosomal recessive
162	16	87870903	rs142192588	SLC7A5		TG	0.185	0.018	8.65e-25	X - 12100
102	10	16482481	rs10795395	PTER		G	-0.155	0.015	7.65e-25	N-acetyltaurine	Yes
62	5	35989989	rs73076175	UGT3A1		G	0.195	0.019	5.17e-25	pregn steroid monosulfate*
117	11	116648917	rs964184	ZPR1	3_prime_UTR_variant	G	0.227	0.022	4.04e-25	oleoyl-oleoyl-glycerol (18:1/18:1) [1]*
188	20	12958687	rs438568	SPTLC3		A	0.158	0.015	3.7e-25	sphingomyelin (d18:1/20:0, d16:1/22:0)*
123	12	21362819	rs11519274	SLCO1B1		T	0.197	0.019	2.23e-25	pregnenolone sulfate		Hyperbilirubinemia, Rotor type, digenic, 237450 (3), Digenic recessive
62	5	35037681	rs40199	AGXT2		G	0.248	0.024	2.19e-25	dimethylarginine (SDMA + ADMA)		Beta-aminoisobutyric acid, urinary excretion of, 210100 (3), Autosomal recessive
106	10	102075479	rs603424	PKD2L1		A	-0.193	0.018	2.11e-25	1-(1-enyl-palmitoyl)-2-palmitoleoyl-GPC (P-16:0/16:1)*
135	14	64239877	rs112329286	SGPP1		TTTTA	-0.206	0.02	1.88e-25	palmitoyl dihydrosphingomyelin (d18:0/16:0)*
176	19	8286918	rs7253584	CERS4		T	-0.192	0.018	1.51e-25	stearoyl sphingomyelin (d18:1/18:0)
64	5	118878937	rs66462865	HSD17B4		T	-0.297	0.028	1.48e-25	X - 17654	Yes	D-bifunctional protein deficiency, 261515 (3), Autosomal recessive; Perrault syndrome 1, 233400 (3), Autosomal recessive
197	22	51063477	rs6151429	ARSA	3_prime_UTR_variant	C	0.285	0.027	1.42e-25	O-sulfo-L-tyrosine		Metachromatic leukodystrophy, 250100 (3), Autosomal recessive
131	13	103718308	rs55971546	SLC10A2	missense_variant	T	0.398	0.038	1.26e-25	glycodeoxycholate sulfate	Yes	Bile acid malabsorption, primary, 613291 (3), Autosomal recessive
70	6	25829633	rs13200784	SLC17A1		T	0.193	0.018	1.17e-25	X - 17690
113	11	61596322	chr11:61596322	FADS2		C	-0.166	0.016	9.49e-26	1-palmitoyl-2-stearoyl-GPC (16:0/18:0)
48	3	195942080	rs5855544	ZDHHC19		T	0.162	0.015	8.48e-26	andro steroid monosulfate (1)*
26	2	65225088	chr2:65225088	SLC1A4		GC	-0.174	0.016	5.28e-26	X - 13684		Spastic tetraplegia, thin corpus callosum, and progressive microcephaly, 616657 (3), Autosomal recessive
31	2	211540507	rs1047891	CPS1	missense_variant	A	0.177	0.017	3.73e-26	N-palmitoylglycine		Carbamoylphosphate synthetase I deficiency, 237300 (3), Autosomal recessive; Pulmonary hypertension, neonatal, susceptibility to, 615371 (3); Venoocclusive disease after bone marrow transplantation (3)
197	22	50665863	rs142384028	TUBGCP6		T	0.588	0.055	2.28e-26	N-acetylputrescine		Microcephaly and chorioretinopathy, autosomal recessive, 1, 251270 (3), Autosomal recessive
65	5	131739433	rs6893782	SLC22A5		C	-0.203	0.019	2.14e-26	carnitine		Carnitine deficiency, systemic primary, 212140 (3), Autosomal recessive
185	19	54676763	rs641738	TMC4	5_prime_UTR_variant	T	0.161	0.015	1.82e-26	1-linoleoyl-GPI (18:2)*
26	2	65225088	chr2:65225088	SLC1A4		GC	0.161	0.015	1.58e-26	2-aminobutyrate		Spastic tetraplegia, thin corpus callosum, and progressive microcephaly, 616657 (3), Autosomal recessive
99	9	136598128	rs3780804	SARDH		G	-0.207	0.019	1.32e-26	sarcosine		Sarcosinemia, 268900 (3), Autosomal recessive
145	15	50474766	rs1648348	SLC27A2	missense_variant	A	-0.176	0.016	6.96e-27	X - 16935
31	2	211540507	rs1047891	CPS1	missense_variant	A	0.176	0.016	3.65e-27	cinnamoylglycine		Carbamoylphosphate synthetase I deficiency, 237300 (3), Autosomal recessive; Pulmonary hypertension, neonatal, susceptibility to, 615371 (3); Venoocclusive disease after bone marrow transplantation (3)
102	10	16472204	rs1873166	PTER		G	-0.166	0.015	2.72e-27	N-acetyl-beta-alanine	Yes
51	4	47545141	rs35818294	ATP10D		A	0.206	0.019	2.69e-27	glycosyl-N-stearoyl-sphingosine (d18:1/18:0)
15	1	119923531	rs2224995	HAO2		A	-0.158	0.014	1.65e-27	alpha-hydroxyisovalerate
111	11	18312637	rs12294486	HPS5		C	0.153	0.014	1.37e-27	2-hydroxy-3-methylvalerate		Hermansky-Pudlak syndrome 5, 614074 (3), Autosomal recessive
183	19	45412079	rs7412	APOE	missense_variant	T	-0.296	0.027	1.35e-27	tricosanoyl sphingomyelin (d18:1/23:0)*		Alzheimer disease-2, 104310 (3), Autosomal dominant; Coronary artery disease, severe, susceptibility to, 617347 (3); Hyperlipoproteinemia, type III, 617347 (3); Lipoprotein glomerulopathy, 611771 (3); ?Macular degeneration, age-related, 603075 (3), Autosomal dominant; Sea-blue histiocyte disease, 269600 (3), Autosomal recessive
19	1	171101497	rs11811455	FMO6P		A	0.19	0.017	9.26e-28	S-methylcysteine
113	11	62806948	rs190491362	SLC22A8		G	0.321	0.029	8.79e-28	11beta-hydroxyandrosterone glucuronide
105	10	96685188	rs1469022736	CYP2C9		C	0.322	0.029	8.24e-28	metabolonic lactone sulfate		Tolbutamide poor metabolizer (3); Warfarin sensitivity, 122700 (3), Autosomal dominant
113	11	61596633	rs99780	FADS2		T	-0.172	0.016	7.75e-28	1-linoleoyl-2-docosahexaenoyl-GPC (18:2/22:6)*
121	12	348876	rs10774020	SLC6A13		T	-0.15	0.014	7.55e-28	pyroglutamine*
175	19	1063443	rs4147929	ABCA7		A	-0.215	0.02	7.08e-28	lactosyl-N-palmitoyl-sphingosine (d18:1/16:0)	Yes	Alzheimer disease 9, susceptibility to, 608907 (3), Autosomal dominant
113	11	61604782	rs2524299	FADS2		T	-0.253	0.023	6.69e-28	1-stearoyl-2-docosapentaenoyl-GPC (18:0/22:5n6)*
86	7	99130834	rs34670419	ZKSCAN5	3_prime_UTR_variant	T	-0.39	0.035	4.22e-28	4-androsten-3beta,17beta-diol disulfate (1)
70	6	25872811	rs10632274	SLC17A3		C	0.183	0.017	3.28e-28	andro steroid monosulfate (1)*		Gout susceptibility 4, 612671 (3), Autosomal dominant; Uric acid concentration, serum, QTL4, 612671 (3), Autosomal dominant
45	3	132396607	rs73000598	UBA5	3_prime_UTR_variant	A	-0.674	0.061	3.08e-28	X - 18899		Epileptic encephalopathy, early infantile, 44, 617132 (3), Autosomal recessive; ?Spinocerebellar ataxia, autosomal recessive 24, 617133 (3), Autosomal recessive
3	1	19186365	rs76018454	TAS1R2		A	0.466	0.042	2.99e-28	X - 17676	Yes
113	11	62844415	rs191081650	SLC22A24		A	0.329	0.03	2.74e-28	pregnanediol-3-glucuronide
27	2	73773503	rs10496193	ALMS1		A	-0.216	0.019	2.33e-28	2-hydroxyoctanoate		Alstrom syndrome, 203800 (3), Autosomal recessive
153	16	20477474	rs6497490	ACSM2A		G	0.312	0.028	1.97e-28	X - 11478
31	2	211540507	rs1047891	CPS1	missense_variant	A	0.178	0.016	1.4e-28	serine		Carbamoylphosphate synthetase I deficiency, 237300 (3), Autosomal recessive; Pulmonary hypertension, neonatal, susceptibility to, 615371 (3); Venoocclusive disease after bone marrow transplantation (3)
146	15	58730498	rs588136	LIPC		C	0.204	0.018	1.28e-28	2-palmitoyl-GPE (16:0)*		Diabetes mellitus, noninsulin-dependent, 125853 (3), Autosomal dominant; Hepatic lipase deficiency, 614025 (3), Autosomal recessive; High density lipoprotein cholesterol level QTL 12, 612797 (3)
105	10	96762598	rs72818661	CYP2C9		G	-0.231	0.021	1.18e-28	4-androsten-3alpha,17alpha-diol monosulfate (3)		Tolbutamide poor metabolizer (3); Warfarin sensitivity, 122700 (3), Autosomal dominant
176	19	8286918	rs7253584	CERS4		T	-0.2	0.018	1.12e-28	sphingomyelin (d18:1/18:1, d18:2/18:0)
199	23	6885254	rs5935065	HDHD1		T	0.138	0.012	9.65e-29	4-androsten-3beta,17beta-diol monosulfate (2)	Yes
152	16	16142079	rs60782127	ABCC1	missense_variant	T	-0.716	0.064	7.56e-29	cys-gly, oxidized
117	11	116648917	rs964184	ZPR1	3_prime_UTR_variant	G	0.244	0.022	5.58e-29	oleoyl-linoleoyl-glycerol (18:1/18:2) [2]
113	11	61593816	rs174568	FADS2		T	-0.177	0.016	5.54e-29	1-(1-enyl-palmitoyl)-2-palmitoyl-GPC (P-16:0/16:0)*
48	3	195942080	rs5855544	ZDHHC19		T	0.16	0.014	4.82e-29	epiandrosterone sulfate
113	11	65143892	rs34400381	SLC25A45	missense_variant	A	0.438	0.039	4.45e-29	N6,N6,N6-trimethyllysine
31	2	211540507	rs1047891	CPS1	missense_variant	A	-0.174	0.016	4.12e-29	betaine		Carbamoylphosphate synthetase I deficiency, 237300 (3), Autosomal recessive; Pulmonary hypertension, neonatal, susceptibility to, 615371 (3); Venoocclusive disease after bone marrow transplantation (3)
123	12	21357711	rs58310495	SLCO1B1		T	0.233	0.021	3.66e-29	1-arachidonoyl-GPE (20:4n6)*		Hyperbilirubinemia, Rotor type, digenic, 237450 (3), Digenic recessive
153	16	20477474	rs6497490	ACSM2A		G	0.314	0.028	2.36e-29	indolepropionate
78	6	160543148	rs12208357	SLC22A1	missense_variant	T	-0.314	0.028	2.02e-29	X - 11381
193	22	19951271	rs4680	COMT	missense_variant	G	0.181	0.016	1.32e-29	glucuronide of piperine metabolite C17H21NO3 (4)*		Panic disorder, susceptibility to, 167870 (3), ?Autosomal dominant; Schizophrenia, susceptibility to, 181500 (3), Autosomal dominant
11	1	85844671	rs2011825	DDAH1		C	0.167	0.015	9.18e-30	dimethylarginine (SDMA + ADMA)
100	10	5034014	chr10:5034014	AKR1C3		A	-0.897	0.079	9.04e-30	cortolone glucuronide (1)
113	11	61596322	chr11:61596322	FADS2		C	-0.178	0.016	6.32e-30	1,2-dipalmitoyl-GPC (16:0/16:0)
20	1	183122480	chr1:183122480	LAMC1		AT	1.249	0.109	4.93e-30	N-acetylneuraminate	Yes
89	7	141798014	rs7801560	MGAM		G	0.219	0.019	4.76e-30	1,5-anhydroglucitol (1,5-AG)
31	2	211543055	rs715	CPS1	3_prime_UTR_variant	C	0.181	0.016	1.63e-30	creatine		Carbamoylphosphate synthetase I deficiency, 237300 (3), Autosomal recessive; Pulmonary hypertension, neonatal, susceptibility to, 615371 (3); Venoocclusive disease after bone marrow transplantation (3)
113	11	61589481	rs28456	FADS2		G	0.189	0.016	1.47e-30	X - 24870
116	11	110246845	rs2724417	FDX1		A	0.183	0.016	1.44e-30	glycocholenate sulfate*	Yes
113	11	61609750	rs174583	FADS2		T	0.181	0.016	8.13e-31	1-stearoyl-2-linoleoyl-GPC (18:0/18:2)*
117	11	116648917	rs964184	ZPR1	3_prime_UTR_variant	G	0.252	0.022	6.52e-31	oleoyl-linoleoyl-glycerol (18:1/18:2) [1]
70	6	25817789	rs1165153	SLC17A1		A	-0.167	0.014	5.1e-31	N-acetylphenylalanine
15	1	120257576	rs477992	PHGDH		A	-0.183	0.016	4.06e-31	serine		Neu-Laxova syndrome 1, 256520 (3), Autosomal recessive; Phosphoglycerate dehydrogenase deficiency, 601815 (3), Autosomal recessive
121	12	320920	rs499368	SLC6A12		T	0.167	0.014	2.11e-31	betaine
113	11	61599347	rs61897793	FADS2		A	0.229	0.02	1.65e-31	1-dihomo-linolenoyl-GPC (20:3n3 or 6)*
78	6	160564476	rs662138	SLC22A1		G	-0.23	0.019	3.15e-32	X - 11261
38	3	45814094	rs17279437	SLC6A20	missense_variant	A	0.253	0.021	2.87e-32	pyroglutamine*		Hyperglycinuria, 138500 (3), Autosomal dominant; Iminoglycinuria, digenic, 242600 (3), Autosomal recessive, Digenic recessive
167	17	18923027	rs61741107	SLC5A10	missense_variant,splice_region_variant	A	-1.378	0.116	2.45e-32	1,5-anhydroglucitol (1,5-AG)
86	7	99130834	rs34670419	ZKSCAN5	3_prime_UTR_variant	T	-0.463	0.039	2.43e-32	4-androsten-3beta,17beta-diol monosulfate (2)
168	17	37648140	rs12942352	CDK12		G	0.198	0.017	2.21e-32	methionine sulfone
162	16	87870903	rs142192588	SLC7A5		TG	0.213	0.018	2.05e-32	kynurenine
178	19	15983485	rs62107766	CYP4F2		A	-0.194	0.016	1.38e-32	octadecenedioate (C18:1-DC)*
178	19	15983485	rs62107766	CYP4F2		A	-0.194	0.016	1.03e-32	hexadecanedioate
9	1	70881670	rs28941785	CTH	5_prime_UTR_variant	T	0.876	0.073	9.97e-33	X - 11795	Yes	Cystathioninuria, 219500 (3), Autosomal recessive; Homocysteine, total plasma, elevated (3)
150	15	85510315	rs8032686	SLC28A1		A	-0.401	0.034	9.04e-33	N4-acetylcytidine	Yes
185	19	54676814	rs34564463	TMC4	5_prime_UTR_variant	GC	0.18	0.015	5.92e-33	1-palmitoyl-2-oleoyl-GPI (16:0/18:1)*
17	1	151920040	rs7538652	THEM4		T	-0.197	0.016	4.08e-33	X - 21353
113	11	61609750	rs174583	FADS2		T	0.193	0.016	2.54e-33	1-linoleoyl-2-linolenoyl-GPC (18:2/18:3)*
123	12	21385604	rs7969341	SLCO1B1		G	0.245	0.02	2.31e-33	glycolithocholate sulfate*		Hyperbilirubinemia, Rotor type, digenic, 237450 (3), Digenic recessive
5	1	47331966	rs6678639	CYP4B1		G	0.288	0.024	1.09e-33	X - 14939
88	7	137790882	rs10274304	AKR1D1		G	-0.216	0.018	1.09e-33	X - 12844		Bile acid synthesis defect, congenital, 2, 235555 (3), Autosomal recessive
39	3	53282188	rs4687717	TKT		T	0.179	0.015	1.03e-33	erythronate*		Short stature, developmental delay, and congenital heart defects, 617044 (3), Autosomal recessive
176	19	8277517	rs12610227	CERS4		A	-0.181	0.015	6.95e-34	sphingomyelin (d18:1/20:0, d16:1/22:0)*
75	6	110760008	rs12210538	SLC22A16	missense_variant	G	-0.208	0.017	5.7e-34	palmitoylcarnitine
70	6	25872811	rs10632274	SLC17A3		C	0.197	0.016	2.26e-34	X - 21410		Gout susceptibility 4, 612671 (3), Autosomal dominant; Uric acid concentration, serum, QTL4, 612671 (3), Autosomal dominant
113	11	61609750	rs174583	FADS2		T	0.19	0.015	1.98e-34	1-stearoyl-2-linoleoyl-GPI (18:0/18:2)
146	15	58723479	rs1077834	LIPC		C	0.221	0.018	1.34e-34	1-stearoyl-2-oleoyl-GPE (18:0/18:1)		Diabetes mellitus, noninsulin-dependent, 125853 (3), Autosomal dominant; Hepatic lipase deficiency, 614025 (3), Autosomal recessive; High density lipoprotein cholesterol level QTL 12, 612797 (3)
17	1	151879761	rs28415528	THEM4		A	-0.202	0.016	8.29e-35	3-hydroxydecanoate
74	6	89879168	rs7775554	PM20D2		C	-0.153	0.012	3.12e-35	N-acetylcarnosine
109	10	135196340	rs149892378	PAOX		GT	0.331	0.027	1.72e-35	X - 24020
152	16	15160493	rs1201459839	PDXDC1		T	0.205	0.016	1.15e-35	1-stearoyl-2-dihomo-linolenoyl-GPC (18:0/20:3n3 or 6)*
150	15	85510315	rs8032686	SLC28A1		A	-0.385	0.031	8.71e-36	5,6-dihydrouridine	Yes
5	1	47398496	rs1126742	CYP4A11	missense_variant	G	0.264	0.021	7.35e-36	undecenoylcarnitine (C11:1)
113	11	61596633	rs99780	FADS2		T	-0.222	0.018	5.51e-36	palmitoyl-arachidonoyl-glycerol (16:0/20:4) [2]*
137	14	74040136	rs151154986	ACOT1	missense_variant	A	-0.53	0.042	4.38e-36	branched-chain, straight-chain, or cyclopropyl 12:1 fatty acid*
185	19	54677001	rs626283	TMC4		C	-0.189	0.015	4.25e-36	1-stearoyl-2-dihomo-linolenoyl-GPI (18:0/20:3n3 or 6)*
123	12	21386493	rs11045886	SLCO1B1		C	0.246	0.019	2.5e-36	X - 11308		Hyperbilirubinemia, Rotor type, digenic, 237450 (3), Digenic recessive
95	8	144688736	rs2242090	PYCRL	missense_variant	C	0.197	0.016	1.89e-36	S-1-pyrroline-5-carboxylate
24	2	27730940	rs1260326	GCKR	missense_variant,splice_region_variant	T	-0.196	0.015	1.6e-36	mannose		Fasting plasma glucose level QTL 5, 613463 (3)
135	14	64232386	rs17101394	SGPP1		A	0.249	0.02	1.47e-36	sphingomyelin (d18:1/22:1, d18:2/22:0, d16:1/24:1)*
95	8	145114844	rs7004867	OPLAH	missense_variant	T	-0.349	0.027	8.9e-37	X - 24512		5-oxoprolinase deficiency, 260005 (3), Autosomal recessive, Autosomal dominant
113	11	61549025	rs174533	MYRF		A	-0.197	0.015	6.49e-37	1-stearoyl-2-docosahexaenoyl-GPC (18:0/22:6)
185	19	54676763	rs641738	TMC4	5_prime_UTR_variant	T	-0.191	0.015	6.38e-37	1-stearoyl-2-arachidonoyl-GPI (18:0/20:4)
113	11	61603510	rs174576	FADS2		A	0.203	0.016	3.29e-37	2-linoleoyl-GPE (18:2)*
25	2	32308917	rs72796853	SPAST		T	-0.493	0.038	2.8e-37	X - 11470		Spastic paraplegia 4, autosomal dominant, 182601 (3), Autosomal dominant
45	3	132302982	rs113272668	ACAD11		G	-0.988	0.077	1.48e-37	X - 24747
70	6	31900754	rs184265581	CFB		C	-0.837	0.065	1.03e-37	X - 11470		Complement factor B deficiency, 615561 (3); Hemolytic uremic syndrome, atypical, susceptibility to, 4, 612924 (3), Autosomal dominant; Macular degeneration, age-related, 14, reduced risk of, 615489 (3)
133	14	55336277	rs7141433	GCH1		T	-0.294	0.023	4.9e-38	dopamine sulfate (2)	Yes	Dystonia, DOPA-responsive, with or without hyperphenylalaninemia, 128230 (3), Autosomal recessive, Autosomal dominant; Hyperphenylalaninemia, BH4-deficient, B, 233910 (3), Autosomal recessive
123	12	21368722	rs4363657	SLCO1B1		C	0.263	0.02	2.66e-38	X - 21339		Hyperbilirubinemia, Rotor type, digenic, 237450 (3), Digenic recessive
106	10	101608919	rs113513789	ABCC2		A	-0.467	0.036	2.38e-38	X - 21467		Dubin-Johnson syndrome, 237500 (3), Autosomal recessive
178	19	15990431	rs2108622	CYP4F2	missense_variant	T	-0.213	0.016	2.3e-38	X - 23756
75	6	110762453	rs72939920	SLC22A16		T	-0.223	0.017	1.39e-38	stearoylcarnitine
63	5	78319710	rs6877698	DMGDH		G	-0.203	0.016	8.63e-39	betaine		Dimethylglycine dehydrogenase deficiency, 605850 (3), Autosomal recessive
184	19	48370656	rs112573139	SULT2A1		AAAAC	0.237	0.018	8.07e-39	androsterone glucuronide
113	11	61609750	rs174583	FADS2		T	0.203	0.015	6.59e-39	1-myristoyl-2-linoleoyl-GPC (14:0/18:2)*
65	5	131685297	rs272857	SLC22A4		G	0.201	0.015	1.61e-39	N-trimethyl 5-aminovalerate		Rheumatoid arthritis, susceptibility to, 180300 (3)
113	11	61596633	rs99780	FADS2		T	-0.208	0.016	6.18e-40	1-adrenoyl-GPC (22:4)*
185	19	54675097	rs11668882	TMC4		C	0.205	0.015	5.09e-40	1-palmitoyl-2-linoleoyl-GPI (16:0/18:2)
97	9	131920986	rs35467189	PPP2R4		C	-0.221	0.017	4.01e-40	succinylcarnitine
170	17	73911715	rs9891076	FBF1		T	-0.232	0.017	2.69e-40	X - 24747
113	11	61621556	rs174599	FADS2		C	0.207	0.015	1.92e-40	1-dihomo-linoleoyl-GPC (20:2)*
143	15	40700022	rs10518693	IVD		T	-0.197	0.015	1.42e-40	isovalerylcarnitine		Isovaleric acidemia, 243500 (3), Autosomal recessive
185	19	54676814	rs34564463	TMC4	5_prime_UTR_variant	GC	0.199	0.015	7.31e-41	1-stearoyl-2-linoleoyl-GPI (18:0/18:2)
124	12	56860020	rs2939302	MIP		A	-0.254	0.019	7.07e-41	glutamine		Cataract 15, multiple types, 615274 (3), Autosomal dominant
172	18	677931	rs2298581	ENOSF1		G	-0.245	0.018	7.02e-41	ribonate	Yes
5	1	46032311	rs2229540	AKR1A1	missense_variant	G	-0.429	0.032	6.5e-41	erythritol
180	19	33357433	rs35975406	SLC7A9		C	-0.204	0.015	6.1e-41	homocitrulline		Cystinuria, 220100 (3), Autosomal recessive, Autosomal dominant
59	4	159648596	rs55936281	PPID		T	-0.225	0.017	3.15e-41	octanoylcarnitine
113	11	61595564	rs968567	FADS2	5_prime_UTR_variant	T	0.264	0.02	2.89e-41	1-stearoyl-2-dihomo-linolenoyl-GPC (18:0/20:3n3 or 6)*
105	10	96582674	rs115249611	CYP2C19		AT	0.397	0.029	1.56e-41	X - 11308		Clopidogrel, impaired responsiveness to, 609535 (3), Autosomal recessive; Mephenytoin poor metabolizer, 609535 (3), Autosomal recessive; Omeprazole poor metabolizer, 609535 (3), Autosomal recessive; Proguanil poor metabolizer, 609535 (3), Autosomal recessive
86	7	99130834	rs34670419	ZKSCAN5	3_prime_UTR_variant	T	-0.468	0.034	1.36e-41	4-androsten-3beta,17beta-diol monosulfate (1)
61	5	1181726	chr5:1181726	SLC6A19		C	0.219	0.016	8.57e-42	methionine sulfone		Hartnup disorder, 234500 (3), Autosomal recessive; Hyperglycinuria, 138500 (3), Autosomal dominant; Iminoglycinuria, digenic, 242600 (3), Autosomal recessive, Digenic recessive
48	3	195942080	rs5855544	ZDHHC19		T	0.201	0.015	7.22e-42	X - 21410
136	14	67966599	rs10873201	TMEM229B		T	-0.201	0.015	5.48e-42	1-(1-enyl-palmitoyl)-2-arachidonoyl-GPC (P-16:0/20:4)*
181	19	36290977	rs3761097	PRODH2	3_prime_UTR_variant	T	0.491	0.036	4.57e-42	X - 11315	Yes
146	15	58730498	rs588136	LIPC		C	0.249	0.018	3.5e-42	1-stearoyl-GPE (18:0)		Diabetes mellitus, noninsulin-dependent, 125853 (3), Autosomal dominant; Hepatic lipase deficiency, 614025 (3), Autosomal recessive; High density lipoprotein cholesterol level QTL 12, 612797 (3)
80	7	33081514	rs4316067	NT5C3A		G	-0.221	0.016	2.48e-42	orotate	Yes	Anemia, hemolytic, due to UMPH1 deficiency, 266120 (3), Autosomal recessive
194	22	24998553	rs5760494	GGT1		T	-0.239	0.017	1.67e-42	cysteine-glutathione disulfide		Glutathioninuria, 231950 (1), Autosomal recessive
146	15	58730498	rs588136	LIPC		C	0.248	0.018	8.73e-43	1-palmitoyl-GPE (16:0)		Diabetes mellitus, noninsulin-dependent, 125853 (3), Autosomal dominant; Hepatic lipase deficiency, 614025 (3), Autosomal recessive; High density lipoprotein cholesterol level QTL 12, 612797 (3)
45	3	132297062	rs113194389	ACAD11		T	0.843	0.061	3.56e-43	X - 24748
113	11	61596633	rs99780	FADS2		T	-0.217	0.016	2.25e-43	1-stearoyl-2-adrenoyl-GPC (18:0/22:4)*
113	11	61549025	rs174533	MYRF		A	-0.216	0.016	1.98e-43	eicosapentaenoate (EPA; 20:5n3)
59	4	159621185	rs6856561	ETFDH		T	-0.233	0.017	1.37e-43	decanoylcarnitine		Glutaric acidemia IIC, 231680 (3), Autosomal recessive
70	6	25786993	rs3799344	SLC17A1		T	-0.208	0.015	1.28e-43	X - 15486
121	12	355842	rs7969761	SLC6A13		C	-0.206	0.015	9.37e-44	3-aminoisobutyrate
106	10	101603522	rs17216177	ABCC2		C	-0.44	0.031	4.82e-44	glycocholenate sulfate*		Dubin-Johnson syndrome, 237500 (3), Autosomal recessive
113	11	61596633	rs99780	FADS2		T	-0.228	0.016	3.55e-44	2-arachidonoyl-GPE (20:4)*
113	11	61551927	rs174536	MYRF		C	-0.229	0.016	2.35e-44	arachidonoylcholine
37	3	30768667	rs147693330	GADL1	3_prime_UTR_variant	TTTCCCAAATTTG	-0.173	0.012	1.01e-44	N-acetylcarnosine
17	1	151921690	rs80320664	THEM4		CTTCT	0.226	0.016	3.11e-45	X - 23680
65	5	131665423	rs272888	SLC22A4		T	0.224	0.016	3.07e-45	isovalerylcarnitine		Rheumatoid arthritis, susceptibility to, 180300 (3)
104	10	61468589	rs1171616	SLC16A9		G	-0.251	0.018	2.44e-45	acetylcarnitine
113	11	61609750	rs174583	FADS2		T	0.223	0.016	1.21e-45	1,2-dilinoleoyl-GPC (18:2/18:2)
113	11	61596322	chr11:61596322	FADS2		C	-0.225	0.016	4.56e-46	1-stearoyl-2-arachidonoyl-GPI (18:0/20:4)
121	12	348876	rs10774020	SLC6A13		T	-0.227	0.016	1.83e-46	imidazole lactate
129	13	95913675	rs9524869	ABCC4		G	0.226	0.016	9.17e-47	N-acetylcarnosine
137	14	74040136	rs151154986	ACOT1	missense_variant	A	-0.593	0.041	8.7e-47	dodecadienoate (12:2)*
31	2	211540507	rs1047891	CPS1	missense_variant	A	-0.227	0.016	4.75e-47	homoarginine		Carbamoylphosphate synthetase I deficiency, 237300 (3), Autosomal recessive; Pulmonary hypertension, neonatal, susceptibility to, 615371 (3); Venoocclusive disease after bone marrow transplantation (3)
17	1	151930673	rs6693396	S100A10		G	0.231	0.016	2.08e-47	X - 13431
90	7	150537635	rs62492368	ABP1		A	-0.235	0.016	1.49e-47	X - 24020
104	10	61468589	rs1171616	SLC16A9		G	-0.244	0.017	1.11e-47	propionylcarnitine
109	10	135196340	rs149892378	PAOX		GT	0.388	0.027	5.65e-48	N-acetyl-isoputreanine*
75	6	110760008	rs12210538	SLC22A16	missense_variant	G	-0.253	0.017	4.56e-48	oleoylcarnitine
97	9	131598767	rs2805102	CCBL1		A	-0.239	0.016	7.08e-49	3-formylindole
176	19	8277713	rs12610250	CERS4		A	-0.212	0.014	1.74e-49	sphingomyelin (d18:1/20:1, d18:2/20:0)*
113	11	61551356	rs174535	MYRF	synonymous_variant	C	-0.233	0.016	9e-50	1-docosapentaenoyl-GPC (22:5n3)*
123	12	21347021	rs12367888	SLCO1B1		T	0.316	0.021	3.51e-50	X - 16935		Hyperbilirubinemia, Rotor type, digenic, 237450 (3), Digenic recessive
93	8	27374686	rs34181437	EPHX2		T	-0.425	0.028	3.36e-51	X - 24747		Hypercholesterolemia, familial, due to LDLR defect, modifier of, 143890 (3), Autosomal dominant
135	14	64232220	rs7160525	SGPP1		A	0.301	0.02	3.34e-51	sphingomyelin (d18:1/20:0, d16:1/22:0)*
113	11	61606642	rs174580	FADS2		G	0.237	0.016	1.12e-51	1-palmitoyl-2-linoleoyl-GPC (16:0/18:2)
86	7	99332948	rs45446698	CYP3A5		G	-0.503	0.033	7.67e-52	dehydroisoandrosterone sulfate (DHEA-S)		Hypertension, salt-sensitive essential, susceptibility to, 145500 (3), Multifactorial
47	3	183739737	rs141853891	ABCC5		TTTTGTTTG	0.228	0.015	7.56e-52	beta-citrylglutamate
146	15	58723479	rs1077834	LIPC		C	0.273	0.018	4.06e-52	1-stearoyl-2-linoleoyl-GPE (18:0/18:2)*		Diabetes mellitus, noninsulin-dependent, 125853 (3), Autosomal dominant; Hepatic lipase deficiency, 614025 (3), Autosomal recessive; High density lipoprotein cholesterol level QTL 12, 612797 (3)
113	11	61596322	chr11:61596322	FADS2		C	-0.241	0.016	1.54e-52	1-(1-enyl-stearoyl)-2-arachidonoyl-GPE (P-18:0/20:4)*
113	11	61609750	rs174583	FADS2		T	0.24	0.016	7.57e-53	1-linoleoyl-GPE (18:2)*
137	14	74064853	rs113831731	ACOT4		A	0.275	0.018	5.66e-53	X - 17653
135	14	64232220	rs7160525	SGPP1		A	0.303	0.02	4.96e-53	sphingomyelin (d18:1/21:0, d17:1/22:0, d16:1/23:0)*
5	1	46051053	rs72688441	NASP		A	-0.523	0.034	3.1e-53	ribitol
115	11	89866715	rs1943379	NAALAD2		A	-0.258	0.017	2.62e-53	beta-citrylglutamate
10	1	76166846	rs7550949	SLC44A5		G	-0.248	0.016	1.22e-53	decanoylcarnitine
113	11	61596633	rs99780	FADS2		T	-0.242	0.016	4.29e-54	1-myristoyl-2-arachidonoyl-GPC (14:0/20:4)*
52	4	69447407	rs1300417508	UGT2B17		GT	-0.255	0.016	3.56e-55	androsterone sulfate		Bone mineral density QTL 12, osteoporosis, 612560 (3)
146	15	58678720	rs261290	LIPC		T	0.247	0.016	8.98e-56	1-palmitoyl-2-oleoyl-GPE (16:0/18:1)		Diabetes mellitus, noninsulin-dependent, 125853 (3), Autosomal dominant; Hepatic lipase deficiency, 614025 (3), Autosomal recessive; High density lipoprotein cholesterol level QTL 12, 612797 (3)
184	19	48370400	rs296384	SULT2A1		G	-0.331	0.021	4.42e-57	glycochenodeoxycholate sulfate
65	5	131728712	rs274550	SLC22A5		G	-0.315	0.02	1.49e-57	tryptophan betaine		Carnitine deficiency, systemic primary, 212140 (3), Autosomal recessive
105	10	96748492	rs9332238	CYP2C9		A	0.304	0.019	1e-57	X - 17654		Tolbutamide poor metabolizer (3); Warfarin sensitivity, 122700 (3), Autosomal dominant
132	14	52981664	rs117463339	TXNDC16	missense_variant	C	-0.719	0.044	5.83e-58	5-bromotryptophan	Yes
123	12	21362819	rs11519274	SLCO1B1		T	0.329	0.02	4.81e-58	deoxycholic acid glucuronide		Hyperbilirubinemia, Rotor type, digenic, 237450 (3), Digenic recessive
113	11	61596633	rs99780	FADS2		T	-0.255	0.016	3.75e-58	linoleoyl-arachidonoyl-glycerol (18:2/20:4) [1]*
113	11	61596633	rs99780	FADS2		T	-0.274	0.017	8.75e-59	linoleoyl-arachidonoyl-glycerol (18:2/20:4) [2]*
5	1	46870761	rs324420	FAAH	missense_variant	A	0.324	0.02	8.06e-59	linoleoyl ethanolamide		Drug addiction, susceptibility to, 606581 (3)
52	4	69447407	rs1300417508	UGT2B17		GT	-0.276	0.017	6.12e-59	5alpha-androstan-3alpha,17beta-diol monosulfate (1)		Bone mineral density QTL 12, osteoporosis, 612560 (3)
114	11	67415054	rs2514036	ACY3	5_prime_UTR_variant	C	-0.306	0.019	3.5e-59	N-acetylphenylalanine
113	11	61609750	rs174583	FADS2		T	0.257	0.016	4.93e-60	1-stearoyl-2-linoleoyl-GPE (18:0/18:2)*
51	4	47545141	rs35818294	ATP10D		A	0.32	0.019	3.41e-60	glycosyl-N-palmitoyl-sphingosine (d18:1/16:0)
90	7	150600845	rs9640171	ABP1		A	-0.27	0.016	1.89e-60	N-acetyl-isoputreanine*
137	14	74094274	rs62004879	ACOT6		T	0.297	0.018	7.5e-62	X - 17654
178	19	15990431	rs2108622	CYP4F2	missense_variant	T	-0.275	0.016	1.83e-62	gamma-CEHC
16	1	147135406	chr1:147135406	ACP6		G	0.296	0.017	4.14e-63	X - 24747	Yes
48	3	195942080	rs5855544	ZDHHC19		T	0.253	0.015	4.07e-63	2,6-dihydroxybenzoic acid
25	2	32308917	rs72796853	SPAST		T	-0.61	0.036	1.9e-63	X - 11444		Spastic paraplegia 4, autosomal dominant, 182601 (3), Autosomal dominant
75	6	110760008	rs12210538	SLC22A16	missense_variant	G	-0.287	0.017	1.77e-63	linoleoylcarnitine*
123	12	21347021	rs12367888	SLCO1B1		T	0.35	0.021	1.64e-63	X - 17653		Hyperbilirubinemia, Rotor type, digenic, 237450 (3), Digenic recessive
113	11	61609750	rs174583	FADS2		T	0.269	0.016	1.78e-64	1-dihomo-linolenoyl-GPE (20:3n3 or 6)*
62	5	35975566	rs6861226	UGT3A1		G	0.354	0.021	1.73e-64	5alpha-pregnan-3beta,20beta-diol monosulfate (1)
10	1	76167924	rs76963882	SLC44A5		C	-0.3	0.018	9.93e-65	cis-4-decenoate (10:1n6)*
123	12	21352541	rs12317268	SLCO1B1		G	0.353	0.021	4.47e-65	taurocholenate sulfate		Hyperbilirubinemia, Rotor type, digenic, 237450 (3), Digenic recessive
116	11	110247797	rs1573558	FDX1		T	0.27	0.016	3.39e-65	3-hydroxy-5-cholestenoic acid	Yes
137	14	74033594	rs11626972	ACOT1		G	0.249	0.014	1.93e-65	undecenoylcarnitine (C11:1)
86	7	99332948	rs45446698	CYP3A5		G	0.64	0.037	5.93e-66	X - 21410		Hypertension, salt-sensitive essential, susceptibility to, 145500 (3), Multifactorial
113	11	61596633	rs99780	FADS2		T	-0.267	0.015	1.28e-67	1-eicosapentaenoyl-GPC (20:5)*
146	15	58678720	rs261290	LIPC		T	0.268	0.015	6.63e-68	1-palmitoyl-2-eicosapentaenoyl-GPE (16:0/20:5)*		Diabetes mellitus, noninsulin-dependent, 125853 (3), Autosomal dominant; Hepatic lipase deficiency, 614025 (3), Autosomal recessive; High density lipoprotein cholesterol level QTL 12, 612797 (3)
161	16	81262147	rs62054669	PKD1L2		A	0.282	0.016	4.03e-68	X - 23749
52	4	69447407	rs1300417508	UGT2B17		GT	-0.267	0.015	1.77e-68	4-androsten-3alpha,17alpha-diol monosulfate (3)		Bone mineral density QTL 12, osteoporosis, 612560 (3)
120	11	134128923	rs113488591	ACAD8	missense_variant	G	0.787	0.044	4.16e-69	isobutyrylcarnitine		Isobutyryl-CoA dehydrogenase deficiency, 611283 (3)
163	16	89691142	rs258341	DPEP1		T	0.259	0.015	3.24e-69	cys-gly, oxidized
157	16	58752466	rs11076256	GOT2	missense_variant	T	0.463	0.026	1.75e-69	phenyllactate (PLA)
146	15	58678720	rs261290	LIPC		T	0.272	0.015	8.3e-71	1-stearoyl-2-docosahexaenoyl-GPE (18:0/22:6)*		Diabetes mellitus, noninsulin-dependent, 125853 (3), Autosomal dominant; Hepatic lipase deficiency, 614025 (3), Autosomal recessive; High density lipoprotein cholesterol level QTL 12, 612797 (3)
135	14	64232220	rs7160525	SGPP1		A	0.354	0.02	5.48e-72	sphingomyelin (d18:1/15:0, d16:1/17:0)*
142	14	104575130	rs12587599	ASPG	3_prime_UTR_variant	T	0.388	0.021	1.94e-72	X - 23739
144	15	45686236	rs7181167	SPATA5L1		G	0.301	0.016	4.11e-73	homoarginine
49	4	9997303	rs3733588	SLC2A9		G	-0.281	0.015	1.25e-73	urate		Hypouricemia, renal, 2, 612076 (3), Autosomal recessive, Autosomal dominant; Uric acid concentration, serum, QTL 2, 612076 (3), Autosomal recessive, Autosomal dominant
45	3	132302982	rs113272668	ACAD11		G	-1.16	0.063	1.06e-74	X - 24309
146	15	58726968	rs139566989	LIPC		C	0.333	0.018	1.05e-74	1-palmitoyl-2-linoleoyl-GPE (16:0/18:2)		Diabetes mellitus, noninsulin-dependent, 125853 (3), Autosomal dominant; Hepatic lipase deficiency, 614025 (3), Autosomal recessive; High density lipoprotein cholesterol level QTL 12, 612797 (3)
184	19	48374320	rs112285002	SULT2A1	3_prime_UTR_variant	T	-0.332	0.018	7.6e-75	4-androsten-3alpha,17alpha-diol monosulfate (3)
113	11	61596633	rs99780	FADS2		T	-0.283	0.015	7.27e-77	1-palmitoyl-2-eicosapentaenoyl-GPC (16:0/20:5)*
86	7	100835885	rs7780766	MOGAT3		T	-0.64	0.034	1.41e-77	N-acetylhistidine
91	8	18272377	rs4921913	NAT2		C	0.33	0.017	1.49e-79	4-acetamidobutanoate		Acetylation, slow, 243400 (3), Autosomal recessive
93	8	27373865	rs751141	EPHX2	missense_variant	A	-0.465	0.024	6.64e-80	X - 24309		Hypercholesterolemia, familial, due to LDLR defect, modifier of, 143890 (3), Autosomal dominant
111	11	18335905	rs10832919	HPS5		G	0.268	0.014	2.33e-80	alpha-hydroxyisovalerate		Hermansky-Pudlak syndrome 5, 614074 (3), Autosomal recessive
95	8	145111529	rs11993554	OPLAH	synonymous_variant	G	-0.516	0.027	1.82e-80	5-oxoproline		5-oxoprolinase deficiency, 260005 (3), Autosomal recessive, Autosomal dominant
123	12	21347021	rs12367888	SLCO1B1		T	0.435	0.023	1.17e-80	X - 21467		Hyperbilirubinemia, Rotor type, digenic, 237450 (3), Digenic recessive
128	12	121176083	rs1799958	ACADS	missense_variant	A	0.324	0.017	2.68e-81	methylsuccinate		Acyl-CoA dehydrogenase, short-chain, deficiency of, 201470 (3), Autosomal recessive
22	1	241713402	rs61825638	KMO		T	0.324	0.017	6.39e-82	kynurenate	Yes
56	4	100201295	rs28364331	ADH1A	splice_region_variant,intron_variant	G	-1.1	0.056	3.76e-83	gluconate
5	1	46870761	rs324420	FAAH	missense_variant	A	0.359	0.018	1.33e-83	oleoyl ethanolamide		Drug addiction, susceptibility to, 606581 (3)
17	1	151879761	rs28415528	THEM4		A	-0.341	0.017	7.1e-84	cis-4-decenoate (10:1n6)*
165	17	7529902	rs13894	SHBG	missense_variant	A	-0.574	0.029	2.46e-84	N6-acetyllysine
113	11	61609750	rs174583	FADS2		T	0.308	0.016	1.07e-85	phosphatidylcholine (18:0/20:2, 20:0/18:2, 18:1/20:1)*
5	1	47398496	rs1126742	CYP4A11	missense_variant	G	0.422	0.021	2.55e-86	10-undecenoate (11:1n1)
146	15	58678720	rs261290	LIPC		T	0.306	0.015	2.17e-86	1-stearoyl-2-arachidonoyl-GPE (18:0/20:4)		Diabetes mellitus, noninsulin-dependent, 125853 (3), Autosomal dominant; Hepatic lipase deficiency, 614025 (3), Autosomal recessive; High density lipoprotein cholesterol level QTL 12, 612797 (3)
193	22	18887537	rs796348424	DGCR6		AT	0.345	0.017	1.71e-86	proline
123	12	21361213	rs73063122	SLCO1B1		C	0.399	0.02	3.14e-87	metabolonic lactone sulfate		Hyperbilirubinemia, Rotor type, digenic, 237450 (3), Digenic recessive
113	11	61596633	rs99780	FADS2		T	-0.31	0.015	2.08e-87	1-arachidonoyl-GPE (20:4n6)*
113	11	61600342	rs174574	FADS2		A	-0.311	0.015	1.44e-87	arachidonate (20:4n6)
10	1	76140273	rs6593585	SLC44A5		A	-0.322	0.016	9.22e-91	cis-4-decenoyl carnitine
113	11	61596633	rs99780	FADS2		T	-0.321	0.016	2.23e-91	1-arachidoyl-2-arachidonoyl-GPC (20:0/20:4)*
105	10	96666504	rs7917253	CYP2C9		C	-0.362	0.018	1.39e-91	X - 11787		Tolbutamide poor metabolizer (3); Warfarin sensitivity, 122700 (3), Autosomal dominant
70	6	25815218	rs56723023	SLC17A1		A	-0.3	0.015	1.17e-91	X - 13866
10	1	76166846	rs7550949	SLC44A5		G	-0.325	0.016	4.76e-92	octanoylcarnitine
136	14	67965452	rs11158671	TMEM229B		A	-0.285	0.014	1.11e-92	1-(1-enyl-palmitoyl)-2-palmitoleoyl-GPC (P-16:0/16:1)*
113	11	61596633	rs99780	FADS2		T	-0.319	0.015	1.03e-92	phosphatidylcholine (16:0/22:5n3, 18:1/20:4)*
27	2	73726605	rs58603761	ALMS1		G	0.384	0.018	8.67e-96	N-acetylhistidine		Alstrom syndrome, 203800 (3), Autosomal recessive
5	1	46870761	rs324420	FAAH	missense_variant	A	0.39	0.019	5.09e-96	N-palmitoylglycine		Drug addiction, susceptibility to, 606581 (3)
137	14	74068430	rs61988865	ACOT4		A	-0.392	0.019	1.22e-96	X - 16935
184	19	48372722	chr19:48372722	SULT2A1		<CN0>	0.389	0.018	8.87e-98	4-androsten-3alpha,17alpha-diol monosulfate (2)
27	2	73769974	rs6546844	ALMS1		G	-0.365	0.017	5.36e-99	methionine sulfone		Alstrom syndrome, 203800 (3), Autosomal recessive
113	11	61596633	rs99780	FADS2		T	-0.331	0.015	6.84e-100	oleoyl-arachidonoyl-glycerol (18:1/20:4) [2]*
200	23	48681187	rs61735967	HDAC6	missense_variant	A	0.666	0.031	7.26e-101	N6-acetyllysine	Yes	Chondrodysplasia with platyspondyly, distinctive brachydactyly, hydrocephaly, and microphthalmia, 300863 (3), X-linked dominant
34	2	234664586	rs35754645	UGT1A8		A	0.339	0.016	8.58e-102	X - 11441
147	15	63443792	rs12148069	LACTB		A	0.325	0.015	4.35e-102	succinylcarnitine
197	22	50964153	rs131805	SCO2		T	0.383	0.018	8.1e-103	5-methyluridine (ribothymidine)		Cardioencephalomyopathy, fatal infantile, due to cytochrome c oxidase deficiency 1, 604377 (3), Autosomal recessive; Myopia 6, 608908 (3), Autosomal dominant
136	14	67964688	rs12878807	TMEM229B		A	-0.316	0.014	5.4e-103	1-(1-enyl-palmitoyl)-2-palmitoyl-GPC (P-16:0/16:0)*
50	4	22807353	rs358240	GBA3		G	0.454	0.021	3.53e-105	ethyl beta-glucopyranoside
184	19	48369844	rs296385	SULT2A1		G	-0.409	0.018	1.16e-107	4-androsten-3beta,17beta-diol disulfate (1)
10	1	76166846	rs7550949	SLC44A5		G	-0.353	0.016	4.44e-109	hexanoylcarnitine
121	12	349298	rs10774021	SLC6A13		C	-0.354	0.016	1.36e-109	1-methylimidazoleacetate
34	2	234664586	rs35754645	UGT1A8		A	0.353	0.016	1.9e-110	X - 11442
135	14	64232220	rs7160525	SGPP1		A	0.437	0.019	2.41e-111	sphingomyelin (d18:1/14:0, d16:1/16:0)*
123	12	21347021	rs12367888	SLCO1B1		T	0.464	0.02	1.86e-111	octadecenedioate (C18:1-DC)*		Hyperbilirubinemia, Rotor type, digenic, 237450 (3), Digenic recessive
146	15	58726744	rs261334	LIPC		G	0.409	0.018	2.1e-112	1-palmitoyl-2-arachidonoyl-GPE (16:0/20:4)*		Diabetes mellitus, noninsulin-dependent, 125853 (3), Autosomal dominant; Hepatic lipase deficiency, 614025 (3), Autosomal recessive; High density lipoprotein cholesterol level QTL 12, 612797 (3)
123	12	21386493	rs11045886	SLCO1B1		C	0.459	0.02	5.97e-113	tetradecanedioate		Hyperbilirubinemia, Rotor type, digenic, 237450 (3), Digenic recessive
86	7	99332948	rs45446698	CYP3A5		G	-0.765	0.033	3.23e-113	5alpha-androstan-3beta,17beta-diol disulfate		Hypertension, salt-sensitive essential, susceptibility to, 145500 (3), Multifactorial
27	2	73751966	rs7567585	ALMS1		A	-0.38	0.017	2.45e-113	X - 11787		Alstrom syndrome, 203800 (3), Autosomal recessive
70	6	25817789	rs1165153	SLC17A1		A	0.333	0.014	2.45e-114	X - 19141
123	12	21386493	rs11045886	SLCO1B1		C	0.464	0.02	2.07e-117	hexadecanedioate		Hyperbilirubinemia, Rotor type, digenic, 237450 (3), Digenic recessive
78	6	160564476	rs662138	SLC22A1		G	-0.438	0.019	3.65e-119	isobutyrylcarnitine
86	7	99332948	rs45446698	CYP3A5		G	0.857	0.036	1.63e-120	andro steroid monosulfate (1)*		Hypertension, salt-sensitive essential, susceptibility to, 145500 (3), Multifactorial
113	11	61588305	rs174564	FADS2		G	0.365	0.015	2.68e-121	1-palmitoyl-2-linoleoyl-GPE (16:0/18:2)
123	12	21352541	rs12317268	SLCO1B1		G	0.497	0.021	2.36e-122	glycodeoxycholate sulfate		Hyperbilirubinemia, Rotor type, digenic, 237450 (3), Digenic recessive
113	11	61596633	rs99780	FADS2		T	-0.366	0.015	5.3e-125	1-palmityl-2-arachidonoyl-GPC (O-16:0/20:4)*
32	2	216900528	rs10178909	PECR		G	0.575	0.024	3.37e-125	X - 17654	Yes
91	8	18273300	rs1495743	NAT2		G	-0.451	0.019	2.6e-126	1-methylxanthine		Acetylation, slow, 243400 (3), Autosomal recessive
146	15	58678720	rs261290	LIPC		T	0.359	0.015	4.85e-127	1-palmitoyl-2-docosahexaenoyl-GPE (16:0/22:6)*		Diabetes mellitus, noninsulin-dependent, 125853 (3), Autosomal dominant; Hepatic lipase deficiency, 614025 (3), Autosomal recessive; High density lipoprotein cholesterol level QTL 12, 612797 (3)
194	22	24267047	rs5751777	MIF		C	-0.354	0.014	6.94e-128	3-formylindole		Rheumatoid arthritis, systemic juvenile, susceptibility to, 604302 (3)
149	15	78825917	rs3885951	AGPHD1,HYKK	missense_variant	G	0.591	0.024	1.28e-128	5-hydroxylysine	Yes
86	7	99332948	rs45446698	CYP3A5		G	-1.192	0.048	7.57e-130	5alpha-androstan-3beta,17beta-diol monosulfate (2)		Hypertension, salt-sensitive essential, susceptibility to, 145500 (3), Multifactorial
53	4	89043634	rs45499402	ABCG2		C	0.571	0.023	1.56e-131	4-hydroxychlorothalonil		Junior blood group system, 614490 (3); Uric acid concentration, serum, QTL1, 138900 (3), ?Autosomal dominant
31	2	211540507	rs1047891	CPS1	missense_variant	A	0.389	0.015	2.81e-135	N-acetylglycine		Carbamoylphosphate synthetase I deficiency, 237300 (3), Autosomal recessive; Pulmonary hypertension, neonatal, susceptibility to, 615371 (3); Venoocclusive disease after bone marrow transplantation (3)
104	10	61467182	rs1171617	SLC16A9		G	-0.424	0.017	6.12e-138	carnitine
121	12	349298	rs10774021	SLC6A13		C	-0.354	0.014	1.17e-138	deoxycarnitine
91	8	18272438	rs4921914	NAT2		C	0.451	0.017	3.52e-143	5-acetylamino-6-amino-3-methyluracil		Acetylation, slow, 243400 (3), Autosomal recessive
27	2	73849170	rs6705977	ALMS1		G	-0.467	0.018	3e-143	2-aminooctanoate		Alstrom syndrome, 203800 (3), Autosomal recessive
86	7	99332948	rs45446698	CYP3A5		G	-0.857	0.033	6.98e-144	4-androsten-3alpha,17alpha-diol monosulfate (3)		Hypertension, salt-sensitive essential, susceptibility to, 145500 (3), Multifactorial
113	11	61596633	rs99780	FADS2		T	-0.412	0.015	5.53e-152	2-arachidonoyl-GPC (20:4)*
31	2	211540507	rs1047891	CPS1	missense_variant	A	0.42	0.016	1.11e-152	gamma-glutamylglycine		Carbamoylphosphate synthetase I deficiency, 237300 (3), Autosomal recessive; Pulmonary hypertension, neonatal, susceptibility to, 615371 (3); Venoocclusive disease after bone marrow transplantation (3)
43	3	124456742	rs1801019	UMPS	missense_variant	C	-0.512	0.019	8.85e-153	orotate	Yes	Orotic aciduria, 258900 (3), Autosomal recessive
123	12	21347021	rs12367888	SLCO1B1		T	0.553	0.021	1.23e-153	hexadecenedioate (C16:1-DC)*		Hyperbilirubinemia, Rotor type, digenic, 237450 (3), Digenic recessive
17	1	151879761	rs28415528	THEM4		A	-0.43	0.016	1.51e-156	X - 18921
63	5	78372514	rs10679800	BHMT2		G	0.492	0.018	9.16e-159	dimethylglycine
113	11	61596322	chr11:61596322	FADS2		C	-0.421	0.015	9.02e-160	1-(1-enyl-stearoyl)-2-arachidonoyl-GPC (P-18:0/20:4)
157	16	58752466	rs11076256	GOT2	missense_variant	T	0.73	0.026	1.87e-163	imidazole lactate
123	12	21347021	rs12367888	SLCO1B1		T	0.561	0.02	9.8e-164	X - 23756		Hyperbilirubinemia, Rotor type, digenic, 237450 (3), Digenic recessive
184	19	48374320	rs112285002	SULT2A1	3_prime_UTR_variant	T	-0.503	0.018	9.5e-165	pregnen-diol disulfate*
2	1	15893862	rs2042367	DNAJC16		C	0.42	0.015	3.83e-165	4-guanidinobutanoate	Yes
27	2	73785358	rs6546847	ALMS1		G	0.47	0.017	3.77e-165	N-acetyl-2-aminooctanoate*		Alstrom syndrome, 203800 (3), Autosomal recessive
50	4	22820504	rs358231	GBA3		A	0.579	0.021	2.72e-167	methyl glucopyranoside (alpha + beta)
184	19	48374320	rs112285002	SULT2A1	3_prime_UTR_variant	T	-0.522	0.018	6.01e-168	pregnenetriol disulfate*
196	22	46694050	rs145763800	GTSE1		A	-1.162	0.041	8e-169	X - 22162
123	12	21347021	rs12367888	SLCO1B1		T	0.568	0.02	4.42e-170	glycocholenate sulfate*		Hyperbilirubinemia, Rotor type, digenic, 237450 (3), Digenic recessive
142	14	104575130	rs12587599	ASPG	3_prime_UTR_variant	T	0.607	0.021	1.67e-178	asparagine
113	11	61596322	chr11:61596322	FADS2		C	-0.443	0.015	1.55e-179	1-(1-enyl-palmitoyl)-2-arachidonoyl-GPC (P-16:0/20:4)*
12	1	89402379	rs1206228892	CCBL2		G	-0.429	0.014	4.62e-186	imidazole lactate	Yes
113	11	61570783	rs174547	FADS1		C	0.455	0.015	2.16e-189	1-stearoyl-2-dihomo-linolenoyl-GPI (18:0/20:3n3 or 6)*
113	11	62844415	rs191081650	SLC22A24		A	0.879	0.029	5.27e-191	etiocholanolone glucuronide
137	14	74068430	rs61988865	ACOT4		A	-0.609	0.02	1.94e-197	X - 24747
113	11	61596633	rs99780	FADS2		T	-0.47	0.015	1.7e-205	1-pentadecanoyl-2-arachidonoyl-GPC (15:0/20:4)*
91	8	18272438	rs4921914	NAT2		C	0.535	0.017	2.33e-206	N-acetylputrescine		Acetylation, slow, 243400 (3), Autosomal recessive
86	7	99235522	rs6465750	ZSCAN25		T	-0.921	0.029	6.04e-211	metabolonic lactone sulfate
113	11	61596633	rs99780	FADS2		T	-0.489	0.015	3.28e-221	1-arachidonoyl-GPC (20:4n6)*
31	2	211540507	rs1047891	CPS1	missense_variant	A	0.496	0.015	3.37e-222	glycine		Carbamoylphosphate synthetase I deficiency, 237300 (3), Autosomal recessive; Pulmonary hypertension, neonatal, susceptibility to, 615371 (3); Venoocclusive disease after bone marrow transplantation (3)
27	2	73850820	rs6711001	ALMS1		G	0.579	0.018	1.28e-223	N-acetylleucine		Alstrom syndrome, 203800 (3), Autosomal recessive
34	2	234664586	rs35754645	UGT1A8		A	0.513	0.015	5.6e-228	succinimide
113	11	61596633	rs99780	FADS2		T	-0.5	0.015	4.59e-231	1-palmitoyl-2-arachidonoyl-GPC (16:0/20:4n6)
86	7	99332948	rs45446698	CYP3A5		G	-1.376	0.041	2.38e-234	5alpha-androstan-3alpha,17beta-diol monosulfate (1)		Hypertension, salt-sensitive essential, susceptibility to, 145500 (3), Multifactorial
86	7	99332948	rs45446698	CYP3A5		G	1.176	0.034	6.46e-243	16a-hydroxy DHEA 3-sulfate		Hypertension, salt-sensitive essential, susceptibility to, 145500 (3), Multifactorial
31	2	211060050	rs2286963	ACADL	missense_variant	G	0.508	0.015	9.26e-247	X - 13431
34	2	234664586	rs35754645	UGT1A8		A	0.543	0.015	5.41e-268	X - 16946
86	7	99332948	rs45446698	CYP3A5		G	-1.254	0.033	3.56e-286	epiandrosterone sulfate		Hypertension, salt-sensitive essential, susceptibility to, 145500 (3), Multifactorial
34	2	234664586	rs35754645	UGT1A8		A	0.558	0.015	2.88e-289	X - 11530
34	2	234664586	rs35754645	UGT1A8		A	0.572	0.015	1.07e-295	X - 21448
34	2	234664586	rs35754645	UGT1A8		A	0.57	0.015	3.37e-300	X - 24849
34	2	234668570	rs887829	UGT1A8		T	0.65295	0.0144422	3.67E-301	bilirubin (E,Z or Z,E)*
34	2	234664586	rs35754645	UGT1A8		A	0.572	0.015	2.75e-303	X - 11522
113	11	61557803	rs102275	TMEM258		C	-0.569066	0.0145258	1.35E-309	1-stearoyl-2-arachidonoyl-GPC (18:0/20:4)
137	14	73997195	chr14:73997195	HEATR4		<CN0>	-0.599	0.015	1.05E-309	decadienedioic acid (C10:2-DC)**

## Sheet: Table S4
			Marginal				Conditioning for top SNP(s)
SNP	Chr	Pos	Ref.Allele	BETA	SE	P	BETA	SE	P	Metabolite
rs10754895	1	15707875	G	0.4204	0.015	7.69e-173	0.329581	0.0187326	2.74e-69	4-guanidinobutanoate
rs10803392	1	15749345	T	-0.3798	0.0167	1.7e-114	-0.184194	0.0205522	3.18e-19	4-guanidinobutanoate
rs12034939	1	19032083	G	0.2001	0.0291	6.14e-12	0.2001	0.0291782	6.99e-12	X - 17676
rs532545	1	20787759	T	-0.1145	0.0157	3.03e-13	-0.1145	0.0157458	3.55e-13	uridine
rs11579411	1	45675873	T	0.2278	0.0338	1.59e-11	0.2278	0.0339032	1.83e-11	linoleoyl ethanolamide
rs6662999	1	45891938	C	-0.1257	0.0186	1.4e-11	-0.1257	0.0186502	1.59e-11	ribitol
rs3737744	1	46583117	G	-0.1487	0.0162	4.35e-20	-0.192175	0.0170751	2.2e-29	N-palmitoylglycine
rs324419	1	46644573	T	-0.1447	0.0212	8.76e-12	-0.209218	0.0223417	7.64e-21	N-palmitoylglycine
rs1998545	1	46727174	T	0.1309	0.0169	9.52e-15	0.111625	0.0170349	5.65e-11	N-palmitoylglycine
rs837398	1	47039009	T	0.1251	0.0187	2.23e-11	0.1251	0.0187462	2.5e-11	X - 18899
rs11211366	1	47048829	G	0.1799	0.0189	1.76e-21	0.1799	0.0189955	2.78e-21	undecenoylcarnitine (C11:1)
rs4646485	1	47051426	G	0.1506	0.0156	4.73e-22	0.123482	0.0161322	1.94e-14	10-undecenoate (11:1n1)
rs4646495	1	47056092	T	0.1848	0.0222	8.48e-17	0.164486	0.0223432	1.81e-13	X - 24748
rs6663731	1	47120014	T	0.1985	0.022	1.83e-19	0.180118	0.0222414	5.57e-16	X - 24748
rs11211415	1	47236049	A	-0.1237	0.0175	1.57e-12	-0.1237	0.0175496	1.81e-12	tetradecanedioate
rs10890467	1	47367491	A	0.1454	0.0157	2.02e-20	0.116249	0.0162286	7.88e-13	10-undecenoate (11:1n1)
rs2056900	1	47380372	A	0.1304	0.0199	5.65e-11	0.1304	0.0199553	6.38e-11	X - 14939
rs2235544	1	54148158	C	-0.1037	0.015	4.73e-12	-0.1037	0.0150405	5.4e-12	thyroxine
rs1570694	1	62875805	G	-0.1351	0.0155	2.88e-18	-0.1351	0.0155657	3.98e-18	1-stearoyl-2-linoleoyl-GPI (18:0/18:2)
rs7553832	1	75864015	G	0.1229	0.0165	9.44e-14	0.159733	0.0170605	7.77e-21	hexanoylcarnitine
rs814875	1	75882161	A	0.1059	0.0155	8.36e-12	0.142347	0.0160208	6.38e-19	hexanoylcarnitine
rs12126155	1	75904143	G	0.1863	0.0178	1.23e-25	0.126625	0.0185629	9.02e-12	cis-4-decenoate (10:1n6)*
rs7518038	1	75927018	A	-0.1202	0.0161	8.28e-14	-0.1202	0.0161507	9.89e-14	X - 23680
rs6683437	1	76089207	A	-0.2742	0.0184	3.19e-50	-0.240032	0.0193389	2.25e-35	cis-4-decenoate (10:1n6)*
rs17433375	1	88801919	T	0.2077	0.016	1.56e-38	0.107836	0.0166014	8.27e-11	imidazole lactate
rs10801696	1	89179129	A	-0.4293	0.0144	2.69e-195	-0.406077	0.0155352	1.31e-150	imidazole lactate
rs2298028	1	119727459	T	-0.13	0.0144	1.75e-19	-0.13	0.0144665	2.56e-19	2-hydroxy-3-methylvalerate
rs12119079	1	145595638	G	0.1096	0.0163	1.77e-11	0.1096	0.016341	1.99e-11	X - 24748
rs6674938	1	145598089	T	0.2927	0.0174	1.69e-63	0.2927	0.0177123	2.42e-61	X - 24747
rs7540799	1	150064317	T	-0.1775	0.0251	1.53e-12	-0.157606	0.0257068	8.74e-10	cis-4-decenoate (10:1n6)*
rs3811418	1	150071673	G	-0.1976	0.0228	4.45e-18	-0.219785	0.0239634	4.66e-20	X - 18921
rs1056037	1	150090621	G	-0.1461	0.0165	8.4e-19	-0.187846	0.0169599	1.64e-28	X - 18921
rs10788819	1	150161717	T	0.1851	0.0191	3.29e-22	0.224963	0.0209897	8.4e-27	cis-4-decenoate (10:1n6)*
rs9943251	1	150183739	A	0.225	0.0159	1.84e-45	0.225	0.0160796	1.72e-44	X - 23680
rs1552604	1	150207027	A	0.1496	0.0171	2.16e-18	0.172928	0.0192829	3.02e-19	cis-4-decenoate (10:1n6)*
rs17585035	1	150256053	G	-0.2951	0.028	5.69e-26	-0.197455	0.0301759	6.01e-11	cis-4-decenoate (10:1n6)*
rs12030180	1	150481030	T	-0.2405	0.0316	2.72e-14	-0.201516	0.0325388	5.9e-10	X - 18921
rs1018390	1	169602966	G	-0.0968	0.0144	1.79e-11	-0.0968	0.0144361	2.01e-11	X - 11381
rs12138459	1	239790238	A	0.1748	0.0159	4.1e-28	0.1748	0.0160097	9.42e-28	kynurenate
rs6735065	2	31396442	G	-0.1978	0.0289	7.69e-12	-0.188711	0.0293009	1.19e-10	X - 11444
rs6758752	2	31583437	G	-0.1126	0.0155	3.74e-13	-0.174945	0.0161459	2.34e-27	X - 11444
rs2208532	2	31642493	G	-0.1216	0.0146	8.17e-17	-0.1216	0.0146589	1.08e-16	11beta-hydroxyandrosterone glucuronide
rs599300	2	31664810	G	-0.129	0.0155	8.61e-17	-0.139243	0.0156067	4.58e-19	X - 11470
rs160806	2	31913974	T	-0.1644	0.022	7.85e-14	-0.237543	0.0227727	1.79e-25	X - 11444
rs12466713	2	32605192	T	-0.1477	0.0188	3.95e-15	-0.17379	0.0192946	2.11e-19	X - 11444
rs12994364	2	32756557	A	-0.233	0.0283	1.82e-16	-0.251878	0.028496	9.65e-19	X - 11470
rs10211524	2	65061578	A	-0.1589	0.0164	3.36e-22	-0.1589	0.0165052	6.13e-22	X - 13684
rs10203600	2	73214906	C	0.1084	0.0156	3.69e-12	0.1084	0.0156473	4.28e-12	N-acetylglutamine
rs17348666	2	73215293	G	-0.1796	0.0257	2.78e-12	-0.242094	0.0267399	1.38e-19	N-acetylarginine
rs6718690	2	73240670	C	-0.1005	0.0149	1.53e-11	-0.250067	0.0177444	4.21e-45	N-delta-acetylornithine
rs6710726	2	73255289	G	0.15	0.0164	5.89e-20	0.10471	0.0174856	2.12e-09	N-acetylleucine
rs6728147	2	73276998	T	0.1041	0.0155	1.87e-11	0.135604	0.0161558	4.72e-17	N-acetylarginine
rs13415504	2	73288534	T	0.2053	0.0186	2.52e-28	0.397148	0.0223285	8.98e-71	N-delta-acetylornithine
rs12104774	2	73325932	T	0.2502	0.0297	3.63e-17	0.212455	0.0317395	2.18e-11	N-acetylleucine
rs6737049	2	73360219	A	0.1547	0.0218	1.28e-12	0.201726	0.0221346	7.97e-20	N-delta-acetylornithine
rs17349049	2	73382585	A	0.2596	0.0173	6.73e-51	0.216141	0.0180629	5.36e-33	N-acetyl-2-aminooctanoate*
rs6706562	2	73402295	G	0.2299	0.0169	3.81e-42	-0.186599	0.0234362	1.69e-15	N-acetyl-2-aminooctanoate*
rs1406105	2	73527769	G	-0.193	0.0223	4.94e-18	-0.269981	0.0263718	1.35e-24	N-acetyl-2-aminooctanoate*
rs17349853	2	73685222	G	0.2629	0.0273	5.97e-22	0.245196	0.0278304	1.25e-18	N-delta-acetylornithine
rs3980654	2	73712555	T	-0.2091	0.0243	7.64e-18	-0.390602	0.0334637	1.76e-31	N-acetyl-2-aminooctanoate*
rs2421668	2	73738604	G	0.2545	0.0152	6.32e-63	0.159244	0.019664	5.57e-16	N-acetyl-2-aminooctanoate*
rs12620091	2	73760327	C	0.2296	0.015	6.9e-53	0.270375	0.0184791	1.77e-48	N-acetyl-2-aminooctanoate*
rs4852974	2	73781439	A	0.1892	0.0164	8.63e-31	0.234404	0.0232042	5.42e-24	N-acetyl-2-aminooctanoate*
rs1653259	2	73953070	A	-0.232	0.0317	2.51e-13	-0.217855	0.0318778	8.25e-12	N-acetylarginine
rs17009433	2	73953519	C	-0.2728	0.0275	3.41e-23	-0.24311	0.0278449	2.53e-18	N-delta-acetylornithine
rs3813232	2	73973127	G	0.1315	0.0191	5.79e-12	0.137464	0.019381	1.32e-12	N-acetylleucine
rs13415017	2	73975731	C	-0.1472	0.0185	1.77e-15	-0.12923	0.0187598	5.63e-12	N-delta-acetylornithine
rs6737156	2	74013242	C	-0.3314	0.042	3.01e-15	-0.27127	0.0423808	1.55e-10	N-delta-acetylornithine
rs1942052	2	135320267	C	-0.1379	0.0185	9.05e-14	-0.1379	0.0185532	1.06e-13	quinolinate
rs7562507	2	201231429	G	0.1697	0.0249	9.41e-12	0.1697	0.0249774	1.09e-11	hydantoin-5-propionic acid
rs2887870	2	210554179	T	0.3903	0.0142	2.59e-166	0.221924	0.0164678	2.16e-41	X - 13431
rs7601356	2	210764902	C	0.5071	0.0146	2.51e-264	0.404584	0.0173497	2.82e-120	X - 13431
rs2007748	2	211065887	C	-0.1018	0.0152	2.12e-11	-0.1018	0.0152387	2.38e-11	gamma-glutamylcitrulline*
rs715	2	211251300	C	0.1299	0.0176	1.57e-13	0.1299	0.0176641	1.93e-13	X - 17325
rs2289473	2	233846764	T	0.1982	0.0279	1.21e-12	0.193917	0.0279161	3.75e-12	bilirubin (Z,Z)
rs706848	2	233964658	G	-0.1133	0.015	4.24e-14	-0.091047	0.0152525	2.38e-09	bilirubin (Z,Z)
rs11689634	2	234002918	C	0.2783	0.0387	6.42e-13	0.234503	0.0393931	2.63e-09	bilirubin (Z,Z)
rs2242100	2	234023025	C	0.1029	0.0157	5.6e-11	0.128811	0.0160393	9.67e-16	X - 21448
rs3796092	2	234055208	A	0.174	0.0249	2.79e-12	0.213373	0.0254468	5.07e-17	X - 21448
rs17864662	2	234161273	T	-0.2075	0.0316	5.15e-11	-0.2075	0.031678	5.74e-11	bilirubin (E,Z or Z,E)*
rs28900384	2	234322676	G	0.434	0.0421	6.43e-25	0.255909	0.0426474	1.97e-09	X - 24849
rs887829	2	234333309	T	0.5701	0.0148	0	0.558439	0.0161206	6.02e-263	X - 24849
rs6431633	2	234355530	A	-0.1289	0.0179	5.97e-13	-0.121846	0.0179943	1.28e-11	bilirubin (Z,Z)
rs2885297	2	234368889	T	-0.1351	0.0186	3.77e-13	-0.118584	0.0187274	2.42e-10	bilirubin (Z,Z)
rs4425108	2	242346671	C	-0.123	0.0154	1.38e-15	-0.113282	0.0155356	3.06e-13	2-hydroxyglutarate
rs10933568	2	242359608	A	0.1084	0.0154	1.94e-12	0.0970785	0.0155228	4e-10	2-hydroxyglutarate
rs1466245	3	15937615	T	0.2742	0.0355	1.13e-14	0.2742	0.0356276	1.4e-14	X - 18913
rs6804368	3	30728577	G	-0.1691	0.0123	5.24e-43	-0.1691	0.012431	3.84e-42	N-acetylcarnosine
rs17260680	3	45571449	T	-0.1642	0.023	9.39e-13	-0.1642	0.0230697	1.1e-12	X - 11315
rs4687718	3	53257343	A	-0.2587	0.0222	2.21e-31	-0.209797	0.023559	5.33e-19	erythronate*
rs681751	3	53433974	T	0.1597	0.0242	4.13e-11	0.139266	0.0247014	1.72e-08	erythronate*
rs13063588	3	56852960	C	0.1026	0.0153	2e-11	0.1026	0.0153395	2.25e-11	N-acetylneuraminate
rs17806888	3	67499012	C	0.2026	0.0231	1.78e-18	0.2026	0.0232062	2.54e-18	succinylcarnitine
rs12487584	3	133782983	T	0.1557	0.0179	3.37e-18	0.1557	0.0179771	4.68e-18	X - 24748
rs6777507	3	134117470	A	-0.2286	0.0294	7.51e-15	-0.2286	0.0295056	9.36e-15	X - 24309
rs6806083	3	184287079	G	0.1679	0.0169	2.93e-23	0.1679	0.016994	5.09e-23	beta-hydroxyisovalerate
rs2271936	3	185165389	C	0.2178	0.016	3.37e-42	0.12934	0.0187871	5.8e-12	beta-citrylglutamate
rs939335	3	185228357	G	0.2251	0.015	6.64e-51	0.163196	0.0176536	2.37e-20	beta-citrylglutamate
rs7617766	3	197399567	T	0.1194	0.018	3.28e-11	0.1194	0.018044	3.66e-11	16a-hydroxy DHEA 3-sulfate
rs7642243	3	197425613	C	0.1363	0.0149	5.82e-20	0.1363	0.0149727	8.77e-20	X - 21410
rs3172708	4	22340281	A	0.1639	0.0191	9.39e-18	0.1639	0.019186	1.31e-17	methyl glucopyranoside (alpha + beta)
rs358231	4	22429602	A	0.4539	0.0207	1.42e-106	0.4539	0.0212825	6.32e-101	ethyl beta-glucopyranoside
rs321630	4	47712927	T	0.1052	0.0149	1.66e-12	0.1052	0.014941	1.91e-12	glycosyl-N-stearoyl-sphingosine (d18:1/18:0)
rs1996598	4	68824465	T	-0.1681	0.0174	4.42e-22	-0.130485	0.0176318	1.36e-13	X - 19141
rs4860941	4	68963570	A	0.1605	0.0154	1.97e-25	0.177679	0.0156197	5.55e-30	X - 19141
rs2708697	4	69031629	T	0.432	0.0149	7.99e-185	0.275404	0.0190359	1.94e-47	X - 19141
rs12511559	4	69066337	A	0.1063	0.0151	1.93e-12	0.109895	0.0151538	4.11e-13	androsterone glucuronide
rs7435827	4	69097539	A	0.1121	0.0161	3.34e-12	0.103802	0.0162084	1.51e-10	etiocholanolone glucuronide
rs983745	4	69494103	C	-0.1105	0.0137	7.28e-16	-0.113372	0.0137562	1.7e-16	androsterone glucuronide
rs3100651	4	69495658	C	0.4308	0.0149	8.25e-184	0.276623	0.0189893	4.53e-48	X - 19141
rs35084682	4	69515619	G	0.1057	0.0162	6.81e-11	0.0966889	0.0163016	3.01e-09	etiocholanolone glucuronide
rs17368459	4	69688893	T	-0.1354	0.0196	4.91e-12	-0.1354	0.0196539	5.61e-12	deoxycholic acid glucuronide
rs6833862	4	69957685	C	0.1525	0.0206	1.33e-13	0.123421	0.020729	2.62e-09	X - 19141
rs4694743	4	70358637	G	-0.1088	0.0164	3.26e-11	-0.1088	0.0164401	3.64e-11	X - 12844
rs4693923	4	89107137	A	0.3163	0.0237	1.25e-40	0.17217	0.0264372	7.4e-11	4-hydroxychlorothalonil
rs2054576	4	89247799	G	0.4829	0.025	3.94e-83	0.314979	0.0288026	7.77e-28	4-hydroxychlorothalonil
rs12505410	4	89249865	G	-0.238	0.0153	1.46e-54	-0.136372	0.016292	5.74e-17	4-hydroxychlorothalonil
rs2725242	4	89288551	T	-0.2416	0.0147	1.07e-60	-0.193452	0.015313	1.38e-36	4-hydroxychlorothalonil
rs958325	4	89428705	T	-0.1131	0.0148	2.14e-14	-0.0840847	0.0150046	2.1e-08	4-hydroxychlorothalonil
rs1709422	4	130284328	C	0.1263	0.0181	3e-12	0.1263	0.0181673	3.6e-12	N-acetylglucosamine/N-acetylgalactosamine
rs852250	5	35958697	T	-0.1031	0.0152	1.18e-11	-0.136784	0.0156361	2.17e-18	5alpha-pregnan-3beta,20beta-diol monosulfate (1)
rs11746242	5	36026796	G	0.1467	0.0156	5.26e-21	0.125841	0.015778	1.51e-15	5alpha-pregnan-3beta,20beta-diol monosulfate (1)
rs4616927	5	36033655	T	0.1549	0.0155	1.63e-23	0.172966	0.0160703	5.14e-27	5alpha-pregnan-3beta,20beta-diol monosulfate (1)
rs11959717	5	118910613	G	-0.3028	0.029	1.6e-25	-0.287457	0.029237	8.2e-23	X - 17654
rs1946462	5	118947962	T	-0.2989	0.0298	1.12e-23	-0.282638	0.0298465	2.81e-21	X - 17654
rs4705915	5	131419357	T	-0.1234	0.0157	3.85e-15	-0.1234	0.015757	4.82e-15	homostachydrine*
rs10477741	5	131823209	G	0.1934	0.022	1.48e-18	0.216632	0.0222901	2.51e-22	isovalerylcarnitine
rs2706395	5	131824702	T	0.1239	0.0182	9.92e-12	0.147205	0.0184033	1.26e-15	isovalerylcarnitine
rs6894249	5	131825446	G	-0.1816	0.0152	6.7e-33	-0.159532	0.0157046	3.04e-24	tryptophan betaine
rs17772565	5	131980304	T	-0.333	0.0375	6.69e-19	-0.246714	0.0386181	1.67e-10	tryptophan betaine
rs17131975	5	138611590	A	-0.304	0.0405	6.09e-14	-0.304	0.0406274	7.28e-14	oxalate (ethanedioate)
rs6936244	6	3086055	T	-0.3392	0.037	4.84e-20	-0.3392	0.0371858	7.39e-20	X - 17676
rs9348689	6	25792632	G	-0.1093	0.015	3.18e-13	-0.0923582	0.0151769	1.16e-09	X - 13866
rs10498728	6	25859299	A	0.2784	0.016	8.25e-68	0.335628	0.0168313	1.8e-88	X - 19141
rs2275906	6	25881788	G	0.185	0.022	4.13e-17	0.302208	0.0228568	6.57e-40	X - 19141
rs1185976	6	25930342	T	-0.192	0.0163	5e-32	-0.139199	0.0176606	3.22e-15	X - 21410
rs1408268	6	25934965	A	0.2006	0.0167	3.07e-33	0.141533	0.0181276	5.83e-15	X - 21410
rs942379	6	25957599	A	0.1177	0.0153	1.44e-14	0.1177	0.0153544	1.78e-14	decadienedioic acid (C10:2-DC)**
rs1165206	6	25975545	A	-0.1	0.0143	2.69e-12	-0.1	0.0143394	3.09e-12	X - 21364
rs7753826	6	26150218	A	0.1809	0.0192	4.43e-21	0.165331	0.0194658	2.01e-17	X - 13866
rs3130825	6	29331472	C	0.1578	0.0226	2.9e-12	0.141202	0.0226514	4.55e-10	X - 21410
rs6926723	6	30990782	A	-0.3499	0.0433	6.43e-16	-0.25084	0.0441083	1.29e-08	X - 11470
rs9266718	6	31457767	C	0.1148	0.0159	5.19e-13	0.0897153	0.0160465	2.26e-08	X - 11470
rs2734331	6	32038330	G	-0.4519	0.0406	8.91e-29	-0.406445	0.0414916	1.17e-22	X - 11470
rs17201560	6	32155246	C	-0.244	0.0369	3.78e-11	-0.213494	0.0371722	9.28e-09	X - 11470
rs454875	6	32320986	A	-0.2315	0.0317	2.82e-13	-0.214335	0.0318612	1.73e-11	X - 11470
rs2608629	6	52733753	G	-0.1291	0.0168	1.54e-14	-0.1291	0.0168642	1.93e-14	1,3,7-trimethylurate
rs282115	6	90038431	A	0.2407	0.0245	8.83e-23	0.196145	0.024983	4.12e-15	N-acetylcarnosine
rs9365128	6	160416422	T	-0.1323	0.0198	2.36e-11	-0.161888	0.0201621	9.8e-16	X - 11381
rs456598	6	160458911	A	-0.2189	0.0217	6.27e-24	-0.2189	0.0218301	1.15e-23	X - 11261
rs622342	6	160492856	C	0.1068	0.0154	4.06e-12	0.1068	0.0154419	4.64e-12	N-acetyl-isoputreanine*
rs1564348	6	160498850	C	-0.1356	0.0191	1.25e-12	-0.162966	0.0194546	5.44e-17	X - 11381
rs2686803	7	48084619	C	0.1185	0.0148	1.18e-15	0.1185	0.0148513	1.47e-15	5-methyluridine (ribothymidine)
rs2329485	7	50643254	T	0.13	0.0192	1.28e-11	0.13	0.0192534	1.46e-11	3-methoxytyrosine
rs2862792	7	63670083	A	-0.0992	0.0139	9.56e-13	-0.0992	0.0139394	1.11e-12	pregnen-diol disulfate*
rs11983997	7	72577180	C	-0.13	0.019	7.8e-12	-0.13	0.0190501	8.85e-12	oleoyl-oleoyl-glycerol (18:1/18:1) [1]*
rs11769698	7	98696103	T	-0.282	0.0218	2.83e-38	2.25203	0.0609951	2.08e-298	metabolonic lactone sulfate
rs12535654	7	98696720	A	-0.3881	0.0245	1.63e-56	-2.38908	0.0602651	0	metabolonic lactone sulfate
rs6960805	7	98718578	T	-0.3545	0.0347	1.68e-24	2.75854	0.0885667	5.67e-213	metabolonic lactone sulfate
rs11971111	7	98719590	A	-0.3543	0.0346	1.31e-24	-4.72397	0.0995783	0	metabolonic lactone sulfate
rs6651108	7	98728921	T	-0.9176	0.0479	8.53e-82	-1.40637	0.0594514	1.03e-123	metabolonic lactone sulfate
rs17161669	7	98746599	A	-0.3551	0.027	1.66e-39	0.815438	0.0469602	1.53e-67	metabolonic lactone sulfate
rs17161692	7	98791799	T	-0.8974	0.0305	2.79e-190	-1.87006	0.0799363	4.87e-121	metabolonic lactone sulfate
rs12535424	7	98891752	A	0.2953	0.0267	1.96e-28	0.187152	0.0300896	4.98e-10	X - 21410
rs10278040	7	98979309	A	0.3644	0.0299	3.63e-34	0.270418	0.0337171	1.06e-15	X - 21410
rs1403196	7	99144257	G	-0.7072	0.0263	2.9e-159	-0.568267	0.0351478	8.49e-59	metabolonic lactone sulfate
rs2741872	7	99177712	T	-0.6458	0.0305	1.67e-99	0.532878	0.0508956	1.19e-25	metabolonic lactone sulfate
rs651430	7	99267779	G	0.0942	0.0141	2.38e-11	0.0942	0.014135	2.66e-11	epiandrosterone sulfate
rs2527902	7	99363007	A	-0.1198	0.015	1.39e-15	-0.103422	0.015176	9.44e-12	andro steroid monosulfate (1)*
rs2525550	7	99371114	T	-0.102	0.015	1.05e-11	-0.102	0.0150376	1.18e-11	16a-hydroxy DHEA 3-sulfate
rs2307345	7	99532962	A	-0.5379	0.0434	2.82e-35	-0.614488	0.0564035	1.22e-27	metabolonic lactone sulfate
rs17250196	7	99655132	T	0.3347	0.0346	3.91e-22	0.305018	0.0350857	3.51e-18	andro steroid monosulfate (1)*
rs11772356	7	100546603	C	0.1552	0.0233	2.72e-11	0.186047	0.0235347	2.67e-15	N-acetylhistidine
rs3735337	7	100628583	A	-0.1861	0.019	1.19e-22	-0.204849	0.0192531	1.94e-26	N-acetylhistidine
rs6954846	7	137401236	G	-0.1475	0.0186	2.19e-15	-0.1475	0.0186654	2.74e-15	X - 12844
rs7795946	7	137435631	A	-0.1433	0.0166	6e-18	-0.1433	0.0166719	8.3e-18	X - 15492
rs7781814	7	150127370	C	-0.1662	0.0188	9.54e-19	-0.142662	0.0190696	7.37e-14	N-acetyl-isoputreanine*
rs6977081	7	150173448	T	-0.2205	0.0158	2.9e-44	-0.184707	0.0165916	8.71e-29	X - 24020
rs740956	7	150229373	C	-0.099	0.0151	5.52e-11	-0.128628	0.0164587	5.49e-15	N-acetyl-isoputreanine*
rs10216051	7	150230138	G	0.1635	0.0155	5.17e-26	0.107197	0.0167039	1.39e-10	N-acetyl-isoputreanine*
rs9640171	7	150231778	A	0.1888	0.0164	1.15e-30	0.137314	0.0171572	1.21e-15	X - 24020
rs3778872	7	150300909	G	0.1924	0.0201	1.05e-21	0.200956	0.0229167	1.8e-18	N-acetyl-isoputreanine*
rs6995047	8	18023461	A	0.1401	0.0189	1.24e-13	0.19169	0.0197761	3.23e-22	5-acetylamino-6-formylamino-3-methyluracil
rs17693103	8	18117126	T	0.1592	0.0232	6.79e-12	0.266301	0.0252601	5.51e-26	5-acetylamino-6-formylamino-3-methyluracil
rs1353039	8	18238219	A	0.1447	0.0158	5.28e-20	0.176456	0.0165888	2e-26	5-acetylamino-6-formylamino-3-methyluracil
rs12678356	8	18243401	T	0.1949	0.0268	3.53e-13	0.1949	0.0268803	4.15e-13	5-acetylamino-6-amino-3-methyluracil
rs13264304	8	18258345	G	0.3009	0.0206	2.54e-48	0.152258	0.0216306	1.94e-12	N-acetylputrescine
rs11993911	8	18258846	A	0.2874	0.0386	9.65e-14	0.220518	0.0388968	1.43e-08	5-acetylamino-6-formylamino-3-methyluracil
rs2410556	8	18298747	C	-0.2078	0.0248	5.34e-17	-0.236377	0.0261678	1.67e-19	5-acetylamino-6-formylamino-3-methyluracil
rs1495747	8	18307141	T	0.426	0.016	3.49e-156	0.219182	0.0200985	1.09e-27	N-acetylputrescine
rs12545528	8	18316228	T	-0.1658	0.0161	7.18e-25	-0.421013	0.0199165	3.49e-99	5-acetylamino-6-formylamino-3-methyluracil
rs6998197	8	18318276	C	0.1091	0.0159	6.81e-12	0.259942	0.0187697	1.29e-43	5-acetylamino-6-formylamino-3-methyluracil
rs7817770	8	18351441	T	0.1088	0.0162	1.87e-11	0.107979	0.016935	1.82e-10	5-acetylamino-6-formylamino-3-methyluracil
rs17126664	8	18393182	G	0.2442	0.031	3.34e-15	0.384531	0.0337674	4.82e-30	5-acetylamino-6-formylamino-3-methyluracil
rs527340	8	26746473	T	-0.1127	0.0171	4.38e-11	-0.106662	0.0171585	5.09e-10	X - 24309
rs2472554	8	27384271	G	-0.1419	0.0168	3e-17	-0.137359	0.0168866	4.15e-16	X - 24309
rs7357432	8	27443762	C	-0.4256	0.0281	8.06e-52	-0.350627	0.0302289	4.17e-31	X - 24747
rs4149257	8	27455621	G	-0.2289	0.0188	4.2e-34	-0.153105	0.0200845	2.48e-14	X - 24747
rs3210186	8	144753454	G	0.1527	0.0159	7.71e-22	0.149598	0.015994	8.49e-21	S-1-pyrroline-5-carboxylate
rs896962	8	144758235	C	0.1856	0.0214	4.21e-18	0.180965	0.0215034	3.91e-17	S-1-pyrroline-5-carboxylate
rs7868408	9	130957685	G	-0.2197	0.0165	1.89e-40	-0.2197	0.0166884	1.4e-39	succinylcarnitine
rs4339935	10	4976044	T	0.1026	0.0151	1.09e-11	0.107004	0.0151459	1.61e-12	cortolone glucuronide (1)
rs1937856	10	5044148	G	0.1482	0.0199	9.53e-14	0.13383	0.0200322	2.38e-11	cortolone glucuronide (1)
rs10795227	10	5058160	G	-0.1711	0.0172	2.58e-23	-0.164614	0.0173686	2.6e-21	cortolone glucuronide (1)
rs7078211	10	5243638	G	0.1566	0.0194	6.91e-16	0.1566	0.019472	8.82e-16	pregnenolone sulfate
rs9424148	10	12186864	C	0.1739	0.0186	8.81e-21	0.1739	0.0186992	1.41e-20	1-methyl-5-imidazoleacetate
rs1722462	10	12189945	C	0.1674	0.0241	3.76e-12	0.1674	0.0241741	4.37e-12	1-ribosyl-imidazoleacetate*
rs1334593	10	16487044	T	-0.1076	0.0154	2.81e-12	-0.101745	0.0155034	5.28e-11	N-acetyl-beta-alanine
rs1052708	10	16593361	G	-0.219	0.0293	7.76e-14	-0.17864	0.0302785	3.64e-09	N-acetyl-beta-alanine
rs7075357	10	16594260	T	0.128	0.0154	9.44e-17	0.0977969	0.0159739	9.22e-10	N-acetyl-beta-alanine
rs1171650	10	61120159	T	0.1216	0.0167	3.3e-13	0.1216	0.016749	3.87e-13	X - 11381
rs1171616	10	61138595	G	-0.1796	0.02	2.71e-19	-0.1796	0.0201108	4.24e-19	N,N-dimethylalanine
rs2104162	10	96626095	C	0.1733	0.0157	2.5e-28	0.219769	0.0164067	6.46e-41	X - 17654
rs1934969	10	96738485	A	-0.1118	0.0153	2.73e-13	-0.168805	0.0159259	3e-26	X - 17654
rs6583979	10	96862601	T	-0.1055	0.0149	1.44e-12	-0.1055	0.0149418	1.66e-12	3-hydroxy-2-ethylpropionate
rs10509684	10	96992991	G	0.1343	0.0188	9.09e-13	0.1343	0.0188604	1.07e-12	andro steroid monosulfate (1)*
rs12769370	10	97022602	C	-0.1242	0.0167	1.03e-13	-0.1242	0.016738	1.17e-13	4-androsten-3alpha,17alpha-diol monosulfate (3)
rs2902299	10	101565250	C	-0.1433	0.0166	6e-18	-0.184269	0.0169196	1.27e-27	X - 21467
rs8187710	10	101601284	A	-0.4642	0.0357	1.18e-38	-0.530855	0.0366301	1.36e-47	X - 21467
rs4751996	10	118387884	A	-0.1272	0.0149	1.38e-17	-0.1272	0.014961	1.86e-17	X - 17654
rs3124440	10	134912329	T	0.1348	0.0206	6e-11	0.140736	0.0206574	9.57e-12	N-acetyl-isoputreanine*
rs11101690	10	134971722	C	0.227	0.0271	5.46e-17	0.189166	0.0274589	5.62e-12	X - 24020
rs10776672	10	135007945	G	0.2127	0.0254	5.57e-17	0.218534	0.0255195	1.1e-17	N-acetyl-isoputreanine*
rs11101730	10	135047326	T	0.3315	0.0265	6.63e-36	0.309275	0.0269103	1.43e-30	X - 24020
rs11024613	11	18283118	T	0.1514	0.014	2.95e-27	0.1514	0.0140918	6.33e-27	2-hydroxy-3-methylvalerate
rs198446	11	61259957	A	0.1203	0.017	1.48e-12	0.11665	0.0170521	7.87e-12	1-stearoyl-2-dihomo-linolenoyl-GPI (18:0/20:3n3 or 6)*
rs198464	11	61278197	A	0.1008	0.0148	9.71e-12	0.0858055	0.0149401	9.29e-09	oleoyl-arachidonoyl-glycerol (18:1/20:4) [2]*
rs412334	11	61316837	T	-0.2141	0.0202	3.01e-26	-0.206872	0.020355	2.89e-24	1-stearoyl-2-dihomo-linolenoyl-GPI (18:0/20:3n3 or 6)*
rs174548	11	61327924	G	0.187	0.0164	4.07e-30	0.187	0.0165263	1.1e-29	X - 24870
rs17156426	11	61365899	G	-0.261	0.0351	1.04e-13	-0.249573	0.0354674	1.97e-12	oleoyl-arachidonoyl-glycerol (18:1/20:4) [2]*
rs17764935	11	61421333	A	-0.2276	0.0343	3.23e-11	-0.232114	0.0344569	1.62e-11	oleoyl-arachidonoyl-glycerol (18:1/20:4) [2]*
rs3758977	11	61493820	G	0.1089	0.0155	2.13e-12	0.0974709	0.015569	3.84e-10	1-stearoyl-2-dihomo-linolenoyl-GPI (18:0/20:3n3 or 6)*
rs956617	11	62567455	T	-0.0984	0.0145	1.15e-11	-0.094369	0.01453	8.32e-11	androsterone glucuronide
rs1939768	11	62671285	T	0.9857	0.025	0	0.963345	0.0273558	1.16e-271	androsterone glucuronide
rs6591778	11	62744343	G	0.1451	0.0137	3.27e-26	0.0870276	0.013891	3.73e-10	androsterone glucuronide
rs1695	11	67109265	G	-0.1037	0.0154	1.65e-11	-0.0883201	0.0156135	1.54e-08	N-acetylphenylalanine
rs2447587	11	67168406	T	-0.2629	0.0287	5.18e-20	-0.254365	0.0291823	2.87e-18	N-acetylphenylalanine
rs948445	11	67171068	C	0.1624	0.0193	3.95e-17	0.1624	0.0193755	5.22e-17	5-bromotryptophan
rs4385902	11	67229481	T	-0.2745	0.0249	2.92e-28	-0.288841	0.0250992	1.2e-30	N-acetylphenylalanine
rs11018860	11	89476997	G	-0.2016	0.0283	1.05e-12	-0.168311	0.0287918	5.04e-09	beta-citrylglutamate
rs7931448	11	89515146	C	-0.2231	0.0159	1e-44	-0.1659	0.0169599	1.35e-22	beta-citrylglutamate
rs2186749	11	89520522	T	-0.4695	0.0377	1.34e-35	-0.369337	0.0396922	1.34e-20	beta-citrylglutamate
rs2266788	11	116165896	G	0.2238	0.0311	6.19e-13	0.2238	0.0312021	7.36e-13	linoleoyl-linoleoyl-glycerol (18:2/18:2) [1]*
rs488192	12	211417	G	-0.1238	0.0184	1.72e-11	-0.1238	0.01845	1.95e-11	1-methylimidazoleacetate
rs10774021	12	219559	C	-0.1504	0.0161	9.49e-21	-0.1504	0.0161905	1.55e-20	1-ribosyl-imidazoleacetate*
rs10841644	12	20838029	A	0.1237	0.0176	2.09e-12	0.1218	0.017662	5.34e-12	X - 21467
rs12228798	12	20855824	T	-0.1164	0.0169	5.68e-12	-0.107268	0.0169826	2.68e-10	hexadecenedioate (C16:1-DC)*
rs4382961	12	20887581	A	0.1608	0.0202	1.71e-15	0.275899	0.0213332	2.94e-38	glycochenodeoxycholate glucuronide (1)
rs4149118	12	20902848	G	-0.1168	0.0162	5.6e-13	-0.1168	0.0162458	6.5e-13	deoxycholic acid glucuronide
rs2417876	12	21040004	T	0.1587	0.0184	6.41e-18	0.149739	0.0190999	4.51e-15	glycochenodeoxycholate glucuronide (1)
rs7960931	12	21050906	G	0.4199	0.0349	2.43e-33	0.262614	0.0358058	2.23e-13	X - 23756
rs10505870	12	21063163	A	0.1195	0.0181	4.05e-11	0.102066	0.018257	2.26e-08	hexadecenedioate (C16:1-DC)*
rs10841726	12	21066970	G	-0.1192	0.0167	9.49e-13	-0.290978	0.0200961	1.64e-47	glycochenodeoxycholate glucuronide (1)
rs981262	12	21203777	A	-0.1146	0.017	1.57e-11	-0.112685	0.0170548	3.92e-11	X - 21467
rs7962588	12	21204643	G	-0.1029	0.0156	4.22e-11	-0.1029	0.0156396	4.72e-11	X - 16935
rs11045823	12	21225012	A	-0.3404	0.0201	2.47e-64	-0.268253	0.0208826	9.09e-38	X - 23756
rs12317268	12	21243808	G	0.5544	0.02	4.01e-169	0.472983	0.0215707	1.43e-106	X - 23756
rs4149071	12	21261231	C	-0.2895	0.0274	4.3e-26	-0.206292	0.0292261	1.68e-12	glycochenodeoxycholate glucuronide (1)
rs11045889	12	21280304	T	0.2133	0.016	1.52e-40	0.314461	0.0189582	8.64e-62	glycochenodeoxycholate glucuronide (1)
rs7977517	12	21357534	C	-0.1512	0.0161	5.93e-21	-0.167715	0.0162594	6.03e-25	X - 23756
rs17333533	12	21396583	C	-0.2126	0.0289	1.89e-13	-0.2126	0.0289891	2.24e-13	metabolonic lactone sulfate
rs11045994	12	21398969	C	-0.1472	0.0191	1.29e-14	-0.130861	0.0192242	9.96e-12	hexadecenedioate (C16:1-DC)*
rs2045938	12	21411619	A	-0.1946	0.0173	2.35e-29	-0.104224	0.0181158	8.76e-09	glycochenodeoxycholate glucuronide (1)
rs7137767	12	21416873	C	-0.1273	0.0154	1.38e-16	-0.106724	0.0155848	7.49e-12	hexadecenedioate (C16:1-DC)*
rs2192174	12	21449487	G	-0.2673	0.036	1.13e-13	-0.260743	0.036399	7.87e-13	glycochenodeoxycholate glucuronide (1)
rs4140763	12	21565869	T	0.2421	0.0309	4.69e-15	0.184484	0.031335	3.92e-09	glycochenodeoxycholate glucuronide (1)
rs10431386	12	119613309	T	0.2752	0.0159	4.08e-67	0.2752	0.016175	6.48e-65	methylsuccinate
rs1169306	12	119922694	T	0.0976	0.0148	4.26e-11	0.0976	0.0148371	4.76e-11	2-hydroxy-3-methylvalerate
rs1169312	12	119925844	T	0.1175	0.0174	1.45e-11	0.1175	0.0174548	1.68e-11	cysteine-glutathione disulfide
rs870004	13	94716064	A	0.2397	0.0173	1.18e-43	0.186254	0.0193156	5.28e-22	N-acetylcarnosine
rs9524873	13	94725387	A	-0.1453	0.0123	3.34e-32	-0.0894175	0.0136851	6.41e-11	N-acetylcarnosine
rs11842969	13	100012376	C	-0.114	0.0148	1.33e-14	-0.114	0.0148493	1.63e-14	X - 23593
rs1549836	13	102491230	T	-0.2036	0.023	8.58e-19	-0.2036	0.0231045	1.23e-18	glycochenodeoxycholate sulfate
rs7155490	14	52007005	T	-0.3047	0.0202	2.06e-51	-0.290584	0.0205558	2.27e-45	5-bromotryptophan
rs1570255	14	52220895	C	-0.2084	0.0245	1.8e-17	-0.174726	0.0246188	1.27e-12	5-bromotryptophan
rs2183080	14	54438736	C	-0.23	0.0231	2.36e-23	-0.23	0.0232263	4.06e-23	3-methoxytyrosine
rs740974	14	72257827	G	-0.1217	0.0159	1.95e-14	-0.0925328	0.0161524	1.01e-08	X - 24309
rs2535918	14	72554539	T	-0.2587	0.0341	3.29e-14	-0.331969	0.0349545	2.16e-21	decadienedioic acid (C10:2-DC)**
rs2242610	14	72788632	G	-0.1062	0.0162	5.54e-11	-0.200614	0.0177721	1.5e-29	decadienedioic acid (C10:2-DC)**
rs932256	14	72810402	G	0.1924	0.0244	3.14e-15	0.248755	0.0267197	1.28e-20	decadienedioic acid (C10:2-DC)**
rs6574121	14	72999324	G	0.1546	0.0171	1.55e-19	0.24095	0.0182427	7.89e-40	X - 24309
rs12589431	14	73020503	T	0.1677	0.0159	5.24e-26	0.21932	0.017121	1.44e-37	X - 24309
rs10138789	14	73034031	C	-0.2586	0.0219	3.54e-32	-0.248759	0.0223784	1.05e-28	decadienedioic acid (C10:2-DC)**
rs2041073	14	73042288	C	0.1119	0.015	8.65e-14	0.1119	0.015047	1.03e-13	X - 24748
rs11625677	14	73109406	C	-0.5773	0.0194	1.38e-194	-0.5773	0.0205723	2.85e-173	X - 24747
rs8019058	14	73266545	C	0.114	0.0156	2.72e-13	0.0983406	0.0158625	5.66e-10	X - 24309
rs12100961	14	73352123	C	0.1199	0.0159	4.67e-14	0.100032	0.0160736	4.87e-10	X - 24309
rs12589136	14	93863439	T	0.1382	0.0186	1.09e-13	0.1382	0.0186582	1.29e-13	cortisol
rs1744297	14	103638225	T	0.3671	0.0225	7.65e-60	0.216996	0.0267021	4.42e-16	X - 23739
rs2282377	14	103641573	G	0.3763	0.021	8.37e-72	0.271145	0.0249827	1.92e-27	X - 23739
rs12148399	15	56368662	A	-0.1931	0.0221	2.38e-18	-0.153726	0.0225782	9.86e-12	1-palmitoyl-2-oleoyl-GPE (16:0/18:1)
rs12185071	15	56470519	T	0.1688	0.022	1.68e-14	0.154848	0.0221643	2.82e-12	1-palmitoyl-2-eicosapentaenoyl-GPE (16:0/20:5)*
rs1532085	15	56470658	A	0.2382	0.0152	2.39e-55	0.166461	0.016826	4.46e-23	1-palmitoyl-2-oleoyl-GPE (16:0/18:1)
rs7165077	15	56474101	T	-0.1586	0.0232	8.13e-12	-0.155348	0.0240545	1.06e-10	1-palmitoyl-2-oleoyl-GPE (16:0/18:1)
rs493987	15	56475198	T	0.1507	0.0213	1.49e-12	0.1507	0.0213596	1.72e-12	1-stearoyl-2-docosahexaenoyl-GPE (18:0/22:6)*
rs11071380	15	56497919	A	-0.1624	0.0153	2.55e-26	-0.118527	0.0169666	2.83e-12	1-palmitoyl-2-oleoyl-GPE (16:0/18:1)
rs375372	15	56503907	T	0.1525	0.0152	1.09e-23	0.134855	0.0155797	4.9e-18	1-palmitoyl-2-oleoyl-GPE (16:0/18:1)
rs261334	15	56514036	G	0.2861	0.0183	4.28e-55	0.322511	0.0186965	1.12e-66	1-palmitoyl-2-oleoyl-GPE (16:0/18:1)
rs11858164	15	56530023	T	0.1128	0.0148	2.51e-14	0.103338	0.0149108	4.2e-12	1-palmitoyl-2-eicosapentaenoyl-GPE (16:0/20:5)*
rs2652838	15	61183141	A	0.2877	0.0193	2.98e-50	0.148567	0.0212922	3e-12	succinylcarnitine
rs1126308	15	61216139	A	0.3228	0.0149	4.44e-104	0.27691	0.0166945	8.67e-62	succinylcarnitine
rs2869030	15	76498858	G	-0.2928	0.0172	5.52e-65	-0.169582	0.0178188	1.78e-21	5-hydroxylysine
rs4887062	15	76624856	G	0.3395	0.0146	1.31e-119	0.431426	0.0159032	4.58e-162	5-hydroxylysine
rs8043105	15	76760411	T	-0.3693	0.0342	3.51e-27	-0.243863	0.0346	1.81e-12	5-hydroxylysine
rs17244648	15	76989804	T	-0.1838	0.0257	8.57e-13	-0.145262	0.0258219	1.85e-08	5-hydroxylysine
rs17814754	16	2236302	G	0.1416	0.0216	5.54e-11	0.1416	0.0216529	6.17e-11	dodecadienoate (12:2)*
rs11075289	16	16005869	T	-0.1143	0.0158	4.68e-13	-0.1143	0.0158448	5.44e-13	cys-gly, oxidized
rs6497484	16	20347219	A	-0.1462	0.0164	4.89e-19	-0.1462	0.0164741	7.02e-19	X - 11478
rs6497490	16	20384975	G	0.2227	0.0286	6.88e-15	0.20344	0.0289125	1.97e-12	X - 21319
rs4783532	16	20405276	G	-0.1073	0.0164	6.04e-11	-0.1073	0.016439	6.7e-11	indolepropionate
rs2214195	16	20406898	C	-0.143	0.0192	9.48e-14	-0.129427	0.019359	2.3e-11	X - 21319
rs7498776	16	20518650	C	0.177	0.0266	2.85e-11	0.177	0.0266767	3.25e-11	beta-hydroxyisovalerate
rs2887799	16	30071334	A	-0.1258	0.015	5e-17	-0.1258	0.0150597	6.63e-17	ascorbic acid 3-sulfate*
rs7203984	16	55556759	C	-0.1503	0.0202	1e-13	-0.1503	0.0202687	1.21e-13	1-palmityl-2-palmitoyl-GPC (O-16:0/16:0)*
rs154440	16	57240117	C	0.1238	0.0146	2.26e-17	0.0958726	0.0148268	1.01e-10	phenyllactate (PLA)
rs8061077	16	57255287	T	-0.1721	0.0183	5.23e-21	-0.194447	0.0185949	1.36e-25	imidazole lactate
rs12696	16	57257853	A	-0.1515	0.0226	2.03e-11	-0.186797	0.0229054	3.49e-16	imidazole lactate
rs11076256	16	57309967	T	0.2754	0.029	2.17e-21	0.225452	0.0302805	9.66e-14	X - 13684
rs1657179	16	57326520	C	0.137	0.0161	1.75e-17	0.103577	0.0167893	6.86e-10	X - 13684
rs12923769	16	57422229	T	0.3113	0.0225	1.56e-43	0.28897	0.0230175	3.76e-36	phenyllactate (PLA)
rs6420424	16	79799603	G	0.2266	0.0153	1.25e-49	0.125257	0.0178788	2.45e-12	X - 23749
rs11645428	16	79816397	A	0.2792	0.016	3.44e-68	0.213642	0.01878	5.5e-30	X - 23749
rs455344	16	88209050	C	0.1254	0.0153	2.48e-16	0.1254	0.0153603	3.24e-16	cysteinylglycine
rs397891	16	88280532	C	-0.1865	0.0148	2.08e-36	-0.208972	0.0162094	5e-38	cys-gly, oxidized
rs258322	16	88283404	A	-0.1624	0.0229	1.32e-12	-0.225996	0.0249003	1.13e-19	cys-gly, oxidized
rs3212358	16	88512240	G	0.1735	0.0148	9.72e-32	0.104638	0.015767	3.21e-11	cys-gly, oxidized
rs7211847	17	7432634	A	-0.1184	0.0157	4.65e-14	-0.188283	0.0160932	1.28e-31	N6-acetyllysine
rs2453580	17	19378913	C	0.1154	0.0153	4.61e-14	0.1154	0.0153485	5.53e-14	N-acetyl-isoputreanine*
rs165656	22	18328863	G	0.1783	0.016	7.68e-29	0.420179	0.0196972	5.74e-101	glucuronide of piperine metabolite C17H21NO3 (4)*
rs165722	22	18329013	C	0.1804	0.016	1.74e-29	0.421575	0.0197011	1.38e-101	glucuronide of piperine metabolite C17H21NO3 (4)*
rs5760492	22	23325202	A	-0.2367	0.0175	1.1e-41	-0.2367	0.0177283	1.16e-40	cysteine-glutathione disulfide
rs6519008	22	35197682	C	-0.178	0.0253	1.98e-12	-0.160859	0.0254497	2.6e-10	5-bromotryptophan
rs2281086	22	35216323	A	0.2826	0.0312	1.33e-19	0.266824	0.0314454	2.15e-17	5-bromotryptophan
rs3091397	22	49304386	G	0.1571	0.0178	1.09e-18	0.1571	0.0178769	1.52e-18	uridine
rs140524	22	49307548	T	-0.1966	0.0198	3.1e-23	-0.444784	0.023807	6.83e-78	5-methyluridine (ribothymidine)
rs470119	22	49313780	T	0.1614	0.0153	5.13e-26	0.350007	0.0184104	1.37e-80	5-methyluridine (ribothymidine)
rs140522	22	49318132	T	-0.1102	0.0165	2.41e-11	-0.1102	0.0165436	2.72e-11	5,6-dihydrothymine

## Sheet: Table S5
Gene Symbol	Chr	Pos	ID	Variant Id	SNP Id	P	NES	Tissue	OMIM entries assocaited with eQTL Gene
CASP9	1	15893862	1:15893862	1_15893862_C_T_b37	rs2042367	4.6e-07	0.27	Ovary
DNAJC16	1	15893862	1:15893862	1_15893862_C_T_b37	rs2042367	4.2e-07	0.24	Adipose - Visceral (Omentum)
RP4-680D5.2	1	15893862	1:15893862	1_15893862_C_T_b37	rs2042367	4.2e-07	-0.36	Testis
CASP9	1	15893862	1:15893862	1_15893862_C_T_b37	rs2042367	6.9e-08	0.58	Spleen
CASP9	1	15893862	1:15893862	1_15893862_C_T_b37	rs2042367	2.9e-08	0.5	Prostate
CASP9	1	15893862	1:15893862	1_15893862_C_T_b37	rs2042367	1.1e-08	0.35	Colon - Sigmoid
CASP9	1	15893862	1:15893862	1_15893862_C_T_b37	rs2042367	4.9e-10	0.45	Brain - Cerebellum
CASP9	1	15893862	1:15893862	1_15893862_C_T_b37	rs2042367	3.7e-10	0.46	Liver
CASP9	1	15893862	1:15893862	1_15893862_C_T_b37	rs2042367	3.7e-10	0.67	Small Intestine - Terminal Ileum
CASP9	1	15893862	1:15893862	1_15893862_C_T_b37	rs2042367	1.2e-10	0.23	Muscle - Skeletal
CASP9	1	15893862	1:15893862	1_15893862_C_T_b37	rs2042367	7.6e-12	0.22	Artery - Tibial
CASP9	1	15893862	1:15893862	1_15893862_C_T_b37	rs2042367	7e-12	0.43	Breast - Mammary Tissue
DNAJC16	1	15893862	1:15893862	1_15893862_C_T_b37	rs2042367	2.6e-12	0.26	Esophagus - Mucosa
CASP9	1	15893862	1:15893862	1_15893862_C_T_b37	rs2042367	3.3e-13	0.33	Nerve - Tibial
RP4-680D5.2	1	15893862	1:15893862	1_15893862_C_T_b37	rs2042367	3.2e-13	0.66	Cells - EBV-transformed lymphocytes
CASP9	1	15893862	1:15893862	1_15893862_C_T_b37	rs2042367	2.9e-13	0.35	Heart - Left Ventricle
CASP9	1	15893862	1:15893862	1_15893862_C_T_b37	rs2042367	1.1e-13	0.44	Esophagus - Gastroesophageal Junction
CASP9	1	15893862	1:15893862	1_15893862_C_T_b37	rs2042367	2e-15	0.56	Stomach
CASP9	1	15893862	1:15893862	1_15893862_C_T_b37	rs2042367	1.9e-15	0.36	Cells - Transformed fibroblasts
CASP9	1	15893862	1:15893862	1_15893862_C_T_b37	rs2042367	2.5e-16	0.32	Esophagus - Muscularis
CASP9	1	15893862	1:15893862	1_15893862_C_T_b37	rs2042367	1.4e-16	0.52	Colon - Transverse
CASP9	1	15893862	1:15893862	1_15893862_C_T_b37	rs2042367	8.6e-17	0.37	Adipose - Visceral (Omentum)
CASP9	1	15893862	1:15893862	1_15893862_C_T_b37	rs2042367	8.1e-17	0.41	Lung
PLEKHM2	1	15893862	1:15893862	1_15893862_C_T_b37	rs2042367	6e-18	0.2	Muscle - Skeletal
AGMAT	1	15893862	1:15893862	1_15893862_C_T_b37	rs2042367	6e-19	0.39	Cells - Transformed fibroblasts
AGMAT	1	15893862	1:15893862	1_15893862_C_T_b37	rs2042367	9.5e-20	-0.69	Pancreas
CASP9	1	15893862	1:15893862	1_15893862_C_T_b37	rs2042367	2.1e-22	0.38	Esophagus - Mucosa
CASP9	1	15893862	1:15893862	1_15893862_C_T_b37	rs2042367	8.7e-23	0.42	Adipose - Subcutaneous
CASP9	1	15893862	1:15893862	1_15893862_C_T_b37	rs2042367	1.3e-23	0.55	Heart - Atrial Appendage
CASP9	1	15893862	1:15893862	1_15893862_C_T_b37	rs2042367	9.6e-24	0.34	Thyroid
CDA	1	20916444	1:20916444	1_20916444_G_A_b37	rs588485	5.7e-07	0.28	Esophagus - Muscularis
CDA	1	20916444	1:20916444	1_20916444_G_A_b37	rs588485	1.9e-07	0.33	Artery - Aorta
PINK1	1	20916444	1:20916444	1_20916444_G_A_b37	rs588485	1.6e-07	0.18	Muscle - Skeletal	Parkinson disease 6, early onset, 605909 (3), Autosomal recessive
PINK1	1	20916444	1:20916444	1_20916444_G_A_b37	rs588485	4.8e-08	-0.13	Skin - Sun Exposed (Lower leg)	Parkinson disease 6, early onset, 605909 (3), Autosomal recessive
CDA	1	20916444	1:20916444	1_20916444_G_A_b37	rs588485	2.9e-08	0.33	Heart - Left Ventricle
CDA	1	20916444	1:20916444	1_20916444_G_A_b37	rs588485	3.6e-10	0.31	Artery - Tibial
CDA	1	20916444	1:20916444	1_20916444_G_A_b37	rs588485	1.3e-10	0.28	Cells - Transformed fibroblasts
CDA	1	20916444	1:20916444	1_20916444_G_A_b37	rs588485	7e-11	0.28	Colon - Transverse
CDA	1	20916444	1:20916444	1_20916444_G_A_b37	rs588485	5.8e-11	0.37	Adipose - Visceral (Omentum)
CDA	1	20916444	1:20916444	1_20916444_G_A_b37	rs588485	5.7e-11	0.46	Small Intestine - Terminal Ileum
CDA	1	20916444	1:20916444	1_20916444_G_A_b37	rs588485	3.1e-11	0.58	Adrenal Gland
CDA	1	20916444	1:20916444	1_20916444_G_A_b37	rs588485	2.4e-11	0.39	Nerve - Tibial
CDA	1	20916444	1:20916444	1_20916444_G_A_b37	rs588485	5e-12	0.44	Adipose - Subcutaneous
CDA	1	20916444	1:20916444	1_20916444_G_A_b37	rs588485	2.4e-12	0.46	Breast - Mammary Tissue
CDA	1	20916444	1:20916444	1_20916444_G_A_b37	rs588485	2.4e-13	-0.4	Skin - Sun Exposed (Lower leg)
CDA	1	20916444	1:20916444	1_20916444_G_A_b37	rs588485	6.4e-14	0.16	Whole Blood
CDA	1	20916444	1:20916444	1_20916444_G_A_b37	rs588485	6.1e-15	0.47	Muscle - Skeletal
CDA	1	20916444	1:20916444	1_20916444_G_A_b37	rs588485	1.4e-16	0.5	Heart - Atrial Appendage
CDA	1	20916444	1:20916444	1_20916444_G_A_b37	rs588485	2.3e-25	0.53	Thyroid
CCDC163P	1	46032311	1:46032311	1_46032311_A_G_b37	rs2229540	6.6e-05	0.96	Colon - Transverse
CCDC163P	1	46032311	1:46032311	1_46032311_A_G_b37	rs2229540	9.9e-07	0.77	Adipose - Visceral (Omentum)
CCDC163P	1	46032311	1:46032311	1_46032311_A_G_b37	rs2229540	5.3e-07	0.93	Colon - Sigmoid
CCDC163P	1	46032311	1:46032311	1_46032311_A_G_b37	rs2229540	4.4e-07	0.89	Esophagus - Mucosa
CCDC163P	1	46032311	1:46032311	1_46032311_A_G_b37	rs2229540	1.8e-07	1	Breast - Mammary Tissue
CCDC163P	1	46032311	1:46032311	1_46032311_A_G_b37	rs2229540	3.2e-08	0.95	Whole Blood
CCDC163P	1	46032311	1:46032311	1_46032311_A_G_b37	rs2229540	8.5e-09	1.1	Adipose - Subcutaneous
CCDC163P	1	46032311	1:46032311	1_46032311_A_G_b37	rs2229540	5.2e-09	1	Lung
CCDC163P	1	46032311	1:46032311	1_46032311_A_G_b37	rs2229540	2.1e-09	0.99	Thyroid
CCDC163P	1	46032311	1:46032311	1_46032311_A_G_b37	rs2229540	2.6e-10	1.1	Skin - Not Sun Exposed (Suprapubic)
CCDC163P	1	46032311	1:46032311	1_46032311_A_G_b37	rs2229540	2.4e-10	1.2	Nerve - Tibial
CCDC163P	1	46032311	1:46032311	1_46032311_A_G_b37	rs2229540	3.4e-11	1	Muscle - Skeletal
CCDC163P	1	46032311	1:46032311	1_46032311_A_G_b37	rs2229540	3.2e-12	1.2	Skin - Sun Exposed (Lower leg)
CCDC163P	1	46051053	1:46051053	1_46051053_G_A_b37	rs72688441	6.6e-05	0.96	Colon - Transverse
CCDC163P	1	46051053	1:46051053	1_46051053_G_A_b37	rs72688441	9.9e-07	0.77	Adipose - Visceral (Omentum)
CCDC163P	1	46051053	1:46051053	1_46051053_G_A_b37	rs72688441	5.3e-07	0.93	Colon - Sigmoid
CCDC163P	1	46051053	1:46051053	1_46051053_G_A_b37	rs72688441	4.4e-07	0.89	Esophagus - Mucosa
CCDC163P	1	46051053	1:46051053	1_46051053_G_A_b37	rs72688441	1.8e-07	1	Breast - Mammary Tissue
CCDC163P	1	46051053	1:46051053	1_46051053_G_A_b37	rs72688441	3.2e-08	0.95	Whole Blood
CCDC163P	1	46051053	1:46051053	1_46051053_G_A_b37	rs72688441	8.5e-09	1.1	Adipose - Subcutaneous
CCDC163P	1	46051053	1:46051053	1_46051053_G_A_b37	rs72688441	5.2e-09	1	Lung
CCDC163P	1	46051053	1:46051053	1_46051053_G_A_b37	rs72688441	2.1e-09	0.99	Thyroid
CCDC163P	1	46051053	1:46051053	1_46051053_G_A_b37	rs72688441	2.6e-10	1.1	Skin - Not Sun Exposed (Suprapubic)
CCDC163P	1	46051053	1:46051053	1_46051053_G_A_b37	rs72688441	2.4e-10	1.2	Nerve - Tibial
CCDC163P	1	46051053	1:46051053	1_46051053_G_A_b37	rs72688441	3.4e-11	1	Muscle - Skeletal
CCDC163P	1	46051053	1:46051053	1_46051053_G_A_b37	rs72688441	3.2e-12	1.2	Skin - Sun Exposed (Lower leg)
FAAH	1	46870761	1:46870761	1_46870761_C_A_b37	rs324420	6.2e-07	-0.36	Heart - Left Ventricle	Drug addiction, susceptibility to, 606581 (3)
RP5-1109J22.1	1	46870761	1:46870761	1_46870761_C_A_b37	rs324420	5.2e-07	0.38	Heart - Atrial Appendage
LINC00505	1	46870761	1:46870761	1_46870761_C_A_b37	rs324420	4.6e-07	0.73	Brain - Putamen (basal ganglia)
FAAH	1	46870761	1:46870761	1_46870761_C_A_b37	rs324420	4.3e-07	-0.38	Colon - Sigmoid	Drug addiction, susceptibility to, 606581 (3)
FAAH	1	46870761	1:46870761	1_46870761_C_A_b37	rs324420	3.6e-07	-0.25	Adipose - Subcutaneous	Drug addiction, susceptibility to, 606581 (3)
FAAH	1	46870761	1:46870761	1_46870761_C_A_b37	rs324420	1.7e-07	-0.29	Artery - Tibial	Drug addiction, susceptibility to, 606581 (3)
FAAH	1	46870761	1:46870761	1_46870761_C_A_b37	rs324420	1.1e-07	-0.37	Esophagus - Gastroesophageal Junction	Drug addiction, susceptibility to, 606581 (3)
RP5-1109J22.1	1	46870761	1:46870761	1_46870761_C_A_b37	rs324420	2.7e-08	0.58	Brain - Anterior cingulate cortex (BA24)
FAAH	1	46870761	1:46870761	1_46870761_C_A_b37	rs324420	7.7e-09	-0.64	Spleen	Drug addiction, susceptibility to, 606581 (3)
NSUN4	1	46870761	1:46870761	1_46870761_C_A_b37	rs324420	4.7e-09	0.23	Muscle - Skeletal
RP5-1109J22.1	1	46870761	1:46870761	1_46870761_C_A_b37	rs324420	3.6e-09	0.49	Brain - Cortex
LURAP1	1	46870761	1:46870761	1_46870761_C_A_b37	rs324420	2.8e-09	0.37	Lung
RP5-1109J22.1	1	46870761	1:46870761	1_46870761_C_A_b37	rs324420	2.8e-09	0.28	Muscle - Skeletal
FAAH	1	46870761	1:46870761	1_46870761_C_A_b37	rs324420	2.3e-09	-0.34	Whole Blood	Drug addiction, susceptibility to, 606581 (3)
RP5-1109J22.1	1	46870761	1:46870761	1_46870761_C_A_b37	rs324420	1.9e-09	0.52	Brain - Cerebellar Hemisphere
RP5-1109J22.1	1	46870761	1:46870761	1_46870761_C_A_b37	rs324420	1.8e-09	0.71	Brain - Putamen (basal ganglia)
FAAH	1	46870761	1:46870761	1_46870761_C_A_b37	rs324420	5.8e-10	-0.42	Brain - Cerebellum	Drug addiction, susceptibility to, 606581 (3)
FAAH	1	46870761	1:46870761	1_46870761_C_A_b37	rs324420	4e-10	-0.28	Skin - Not Sun Exposed (Suprapubic)	Drug addiction, susceptibility to, 606581 (3)
FAAH	1	46870761	1:46870761	1_46870761_C_A_b37	rs324420	4.7e-11	-0.33	Esophagus - Muscularis	Drug addiction, susceptibility to, 606581 (3)
RP5-1109J22.1	1	46870761	1:46870761	1_46870761_C_A_b37	rs324420	3.5e-11	0.49	Brain - Cerebellum
RP5-1109J22.1	1	46870761	1:46870761	1_46870761_C_A_b37	rs324420	1.8e-11	0.53	Testis
RP5-1109J22.1	1	46870761	1:46870761	1_46870761_C_A_b37	rs324420	1.4e-11	0.44	Brain - Nucleus accumbens (basal ganglia)
RP5-1109J22.1	1	46870761	1:46870761	1_46870761_C_A_b37	rs324420	3.8e-12	0.27	Thyroid
RP5-1109J22.1	1	46870761	1:46870761	1_46870761_C_A_b37	rs324420	2.7e-12	0.61	Brain - Caudate (basal ganglia)
RP5-1109J22.1	1	46870761	1:46870761	1_46870761_C_A_b37	rs324420	1.5e-12	0.32	Nerve - Tibial
FAAH	1	46870761	1:46870761	1_46870761_C_A_b37	rs324420	2.7e-14	-0.35	Skin - Sun Exposed (Lower leg)	Drug addiction, susceptibility to, 606581 (3)
FAAH	1	46870761	1:46870761	1_46870761_C_A_b37	rs324420	2.1e-16	-0.42	Esophagus - Mucosa	Drug addiction, susceptibility to, 606581 (3)
CYP4A11	1	47331966	1:47331966	1_47331966_A_G_b37	rs6678639	3.6e-09	0.4	Adipose - Subcutaneous
CYP4A11	1	47364062	1:47364062	1_47364062_C_G_b37	rs59428107	7.9e-07	0.5	Breast - Mammary Tissue
CYP4A11	1	47364062	1:47364062	1_47364062_C_G_b37	rs59428107	7.8e-10	0.41	Adipose - Subcutaneous
CYP4A11	1	47398496	1:47398496	1_47398496_A_G_b37	rs1126742	2.5e-10	0.42	Adipose - Subcutaneous
RP11-346M5.1	1	47399967	1:47399967	1_47399967_G_A_b37	rs28451040	9.5e-07	0.47	Breast - Mammary Tissue
CYP4A11	1	47399967	1:47399967	1_47399967_G_A_b37	rs28451040	8.6e-07	0.3	Artery - Tibial
CYP4B1	1	47399967	1:47399967	1_47399967_G_A_b37	rs28451040	8.6e-07	-0.25	Esophagus - Mucosa
CYP4A22	1	47399967	1:47399967	1_47399967_G_A_b37	rs28451040	7.7e-07	-0.43	Stomach
CYP4A11	1	47399967	1:47399967	1_47399967_G_A_b37	rs28451040	6.3e-07	0.3	Thyroid
CYP4A22	1	47399967	1:47399967	1_47399967_G_A_b37	rs28451040	5e-07	-0.26	Nerve - Tibial
CYP4B1	1	47399967	1:47399967	1_47399967_G_A_b37	rs28451040	3.6e-07	-0.21	Lung
CYP4A22	1	47399967	1:47399967	1_47399967_G_A_b37	rs28451040	2.3e-08	-0.34	Liver
CYP4A11	1	47399967	1:47399967	1_47399967_G_A_b37	rs28451040	5.8e-09	0.33	Nerve - Tibial
CYP4A11	1	47399967	1:47399967	1_47399967_G_A_b37	rs28451040	6.5e-17	0.45	Adipose - Subcutaneous
CYP4A11	1	47405408	1:47405408	1_47405408_A_C_b37	rs9332996	5.3e-08	0.49	Thyroid
HSPB11	1	54419526	1:54419526	1_54419526_T_A_b37	rs12127960	8.2e-07	0.16	Thyroid
TMEM59	1	54419526	1:54419526	1_54419526_T_A_b37	rs12127960	8.2e-09	0.14	Esophagus - Mucosa
DOCK7	1	62929378	1:62929378	1_62929378_TA_T_b37	rs11356503	4.2e-07	-0.15	Artery - Tibial	Epileptic encephalopathy, early infantile, 23, 615859 (3), Autosomal recessive
DOCK7	1	62929378	1:62929378	1_62929378_TA_T_b37	rs11356503	3.2e-07	-0.2	Skin - Not Sun Exposed (Suprapubic)	Epileptic encephalopathy, early infantile, 23, 615859 (3), Autosomal recessive
DOCK7	1	62929378	1:62929378	1_62929378_TA_T_b37	rs11356503	3.4e-08	-0.25	Whole Blood	Epileptic encephalopathy, early infantile, 23, 615859 (3), Autosomal recessive
DOCK7	1	62929378	1:62929378	1_62929378_TA_T_b37	rs11356503	4.4e-14	-0.25	Skin - Sun Exposed (Lower leg)	Epileptic encephalopathy, early infantile, 23, 615859 (3), Autosomal recessive
DOCK7	1	62929378	1:62929378	1_62929378_TA_T_b37	rs11356503	1.3e-22	-0.35	Cells - Transformed fibroblasts	Epileptic encephalopathy, early infantile, 23, 615859 (3), Autosomal recessive
DOCK7	1	63042738	1:63042738	1_63042738_A_G_b37	rs10789116	1.1e-07	-0.21	Skin - Not Sun Exposed (Suprapubic)	Epileptic encephalopathy, early infantile, 23, 615859 (3), Autosomal recessive
DOCK7	1	63042738	1:63042738	1_63042738_A_G_b37	rs10789116	1e-07	-0.16	Artery - Tibial	Epileptic encephalopathy, early infantile, 23, 615859 (3), Autosomal recessive
DOCK7	1	63042738	1:63042738	1_63042738_A_G_b37	rs10789116	1.9e-08	-0.25	Whole Blood	Epileptic encephalopathy, early infantile, 23, 615859 (3), Autosomal recessive
DOCK7	1	63042738	1:63042738	1_63042738_A_G_b37	rs10789116	1.9e-14	-0.25	Skin - Sun Exposed (Lower leg)	Epileptic encephalopathy, early infantile, 23, 615859 (3), Autosomal recessive
DOCK7	1	63042738	1:63042738	1_63042738_A_G_b37	rs10789116	5.5e-24	-0.36	Cells - Transformed fibroblasts	Epileptic encephalopathy, early infantile, 23, 615859 (3), Autosomal recessive
DOCK7	1	63056112	1:63056112	1_63056112_G_A_b37	rs1748197	7.9e-07	-0.2	Artery - Aorta	Epileptic encephalopathy, early infantile, 23, 615859 (3), Autosomal recessive
DOCK7	1	63056112	1:63056112	1_63056112_G_A_b37	rs1748197	1.4e-09	-0.26	Whole Blood	Epileptic encephalopathy, early infantile, 23, 615859 (3), Autosomal recessive
DOCK7	1	63056112	1:63056112	1_63056112_G_A_b37	rs1748197	4.7e-13	-0.24	Skin - Sun Exposed (Lower leg)	Epileptic encephalopathy, early infantile, 23, 615859 (3), Autosomal recessive
DOCK7	1	63056112	1:63056112	1_63056112_G_A_b37	rs1748197	6.5e-25	-0.35	Cells - Transformed fibroblasts	Epileptic encephalopathy, early infantile, 23, 615859 (3), Autosomal recessive
MSH4	1	76123973	1:76123973	1_76123973_C_G_b37	rs6672180	9.3e-07	0.38	Adipose - Visceral (Omentum)
ACADM	1	76123973	1:76123973	1_76123973_C_G_b37	rs6672180	2.8e-07	0.19	Skin - Not Sun Exposed (Suprapubic)	Acyl-CoA dehydrogenase, medium chain, deficiency of, 201450 (3), Autosomal recessive
MSH4	1	76123973	1:76123973	1_76123973_C_G_b37	rs6672180	2.6e-07	0.42	Heart - Left Ventricle
MSH4	1	76123973	1:76123973	1_76123973_C_G_b37	rs6672180	1.6e-07	0.31	Muscle - Skeletal
ACADM	1	76123973	1:76123973	1_76123973_C_G_b37	rs6672180	1.5e-07	0.25	Testis	Acyl-CoA dehydrogenase, medium chain, deficiency of, 201450 (3), Autosomal recessive
MSH4	1	76123973	1:76123973	1_76123973_C_G_b37	rs6672180	1.5e-07	0.34	Thyroid
MSH4	1	76123973	1:76123973	1_76123973_C_G_b37	rs6672180	1.4e-07	0.32	Artery - Tibial
MSH4	1	76123973	1:76123973	1_76123973_C_G_b37	rs6672180	8e-08	0.41	Skin - Not Sun Exposed (Suprapubic)
MSH4	1	76123973	1:76123973	1_76123973_C_G_b37	rs6672180	5.1e-08	0.51	Breast - Mammary Tissue
MSH4	1	76123973	1:76123973	1_76123973_C_G_b37	rs6672180	3.6e-08	0.41	Esophagus - Mucosa
ACADM	1	76123973	1:76123973	1_76123973_C_G_b37	rs6672180	2.9e-08	0.21	Thyroid	Acyl-CoA dehydrogenase, medium chain, deficiency of, 201450 (3), Autosomal recessive
ACADM	1	76123973	1:76123973	1_76123973_C_G_b37	rs6672180	2.5e-08	0.24	Skin - Sun Exposed (Lower leg)	Acyl-CoA dehydrogenase, medium chain, deficiency of, 201450 (3), Autosomal recessive
MSH4	1	76123973	1:76123973	1_76123973_C_G_b37	rs6672180	2.2e-08	0.5	Colon - Sigmoid
MSH4	1	76123973	1:76123973	1_76123973_C_G_b37	rs6672180	1.6e-08	0.49	Esophagus - Gastroesophageal Junction
ACADM	1	76123973	1:76123973	1_76123973_C_G_b37	rs6672180	2e-09	-0.53	Brain - Cerebellum	Acyl-CoA dehydrogenase, medium chain, deficiency of, 201450 (3), Autosomal recessive
MSH4	1	76123973	1:76123973	1_76123973_C_G_b37	rs6672180	7.1e-10	0.5	Colon - Transverse
ACADM	1	76123973	1:76123973	1_76123973_C_G_b37	rs6672180	3e-11	0.21	Whole Blood	Acyl-CoA dehydrogenase, medium chain, deficiency of, 201450 (3), Autosomal recessive
ACADM	1	76123973	1:76123973	1_76123973_C_G_b37	rs6672180	2.2e-11	0.48	Adrenal Gland	Acyl-CoA dehydrogenase, medium chain, deficiency of, 201450 (3), Autosomal recessive
ACADM	1	76123973	1:76123973	1_76123973_C_G_b37	rs6672180	1.4e-11	-0.65	Brain - Cerebellar Hemisphere	Acyl-CoA dehydrogenase, medium chain, deficiency of, 201450 (3), Autosomal recessive
ACADM	1	76123973	1:76123973	1_76123973_C_G_b37	rs6672180	1.1e-11	0.39	Colon - Sigmoid	Acyl-CoA dehydrogenase, medium chain, deficiency of, 201450 (3), Autosomal recessive
ACADM	1	76123973	1:76123973	1_76123973_C_G_b37	rs6672180	1.1e-11	0.23	Lung	Acyl-CoA dehydrogenase, medium chain, deficiency of, 201450 (3), Autosomal recessive
ACADM	1	76123973	1:76123973	1_76123973_C_G_b37	rs6672180	8.1e-12	0.32	Colon - Transverse	Acyl-CoA dehydrogenase, medium chain, deficiency of, 201450 (3), Autosomal recessive
MSH4	1	76123973	1:76123973	1_76123973_C_G_b37	rs6672180	3.1e-14	0.44	Nerve - Tibial
MSH4	1	76123973	1:76123973	1_76123973_C_G_b37	rs6672180	7.8e-16	0.55	Esophagus - Muscularis
ACADM	1	76123973	1:76123973	1_76123973_C_G_b37	rs6672180	3.3e-18	0.32	Esophagus - Muscularis	Acyl-CoA dehydrogenase, medium chain, deficiency of, 201450 (3), Autosomal recessive
ACADM	1	76123973	1:76123973	1_76123973_C_G_b37	rs6672180	3.2e-18	0.3	Heart - Left Ventricle	Acyl-CoA dehydrogenase, medium chain, deficiency of, 201450 (3), Autosomal recessive
ACADM	1	76123973	1:76123973	1_76123973_C_G_b37	rs6672180	3.7e-19	0.43	Stomach	Acyl-CoA dehydrogenase, medium chain, deficiency of, 201450 (3), Autosomal recessive
ACADM	1	76123973	1:76123973	1_76123973_C_G_b37	rs6672180	6.7e-27	0.35	Heart - Atrial Appendage	Acyl-CoA dehydrogenase, medium chain, deficiency of, 201450 (3), Autosomal recessive
ACADM	1	76123973	1:76123973	1_76123973_C_G_b37	rs6672180	8.7e-31	0.21	Muscle - Skeletal	Acyl-CoA dehydrogenase, medium chain, deficiency of, 201450 (3), Autosomal recessive
ACADM	1	76135946	1:76135946	1_76135946_A_G_b37	rs7552404	5.8e-07	0.19	Skin - Not Sun Exposed (Suprapubic)	Acyl-CoA dehydrogenase, medium chain, deficiency of, 201450 (3), Autosomal recessive
MSH4	1	76135946	1:76135946	1_76135946_A_G_b37	rs7552404	5.3e-07	0.41	Heart - Left Ventricle
ACADM	1	76135946	1:76135946	1_76135946_A_G_b37	rs7552404	2.9e-07	0.25	Testis	Acyl-CoA dehydrogenase, medium chain, deficiency of, 201450 (3), Autosomal recessive
MSH4	1	76135946	1:76135946	1_76135946_A_G_b37	rs7552404	1.8e-07	0.32	Artery - Tibial
MSH4	1	76135946	1:76135946	1_76135946_A_G_b37	rs7552404	1.6e-07	0.34	Thyroid
MSH4	1	76135946	1:76135946	1_76135946_A_G_b37	rs7552404	1.5e-07	0.31	Muscle - Skeletal
MSH4	1	76135946	1:76135946	1_76135946_A_G_b37	rs7552404	5.2e-08	0.42	Skin - Not Sun Exposed (Suprapubic)
MSH4	1	76135946	1:76135946	1_76135946_A_G_b37	rs7552404	5.1e-08	0.51	Breast - Mammary Tissue
ACADM	1	76135946	1:76135946	1_76135946_A_G_b37	rs7552404	4.1e-08	0.23	Skin - Sun Exposed (Lower leg)	Acyl-CoA dehydrogenase, medium chain, deficiency of, 201450 (3), Autosomal recessive
ACADM	1	76135946	1:76135946	1_76135946_A_G_b37	rs7552404	3.8e-08	0.2	Thyroid	Acyl-CoA dehydrogenase, medium chain, deficiency of, 201450 (3), Autosomal recessive
MSH4	1	76135946	1:76135946	1_76135946_A_G_b37	rs7552404	3.4e-08	0.41	Esophagus - Mucosa
MSH4	1	76135946	1:76135946	1_76135946_A_G_b37	rs7552404	2.6e-08	0.5	Colon - Sigmoid
MSH4	1	76135946	1:76135946	1_76135946_A_G_b37	rs7552404	1.1e-08	0.5	Esophagus - Gastroesophageal Junction
ACADM	1	76135946	1:76135946	1_76135946_A_G_b37	rs7552404	1.4e-09	-0.53	Brain - Cerebellum	Acyl-CoA dehydrogenase, medium chain, deficiency of, 201450 (3), Autosomal recessive
MSH4	1	76135946	1:76135946	1_76135946_A_G_b37	rs7552404	1.3e-09	0.49	Colon - Transverse
ACADM	1	76135946	1:76135946	1_76135946_A_G_b37	rs7552404	5.1e-11	0.21	Whole Blood	Acyl-CoA dehydrogenase, medium chain, deficiency of, 201450 (3), Autosomal recessive
ACADM	1	76135946	1:76135946	1_76135946_A_G_b37	rs7552404	4.2e-11	0.22	Lung	Acyl-CoA dehydrogenase, medium chain, deficiency of, 201450 (3), Autosomal recessive
ACADM	1	76135946	1:76135946	1_76135946_A_G_b37	rs7552404	1.7e-11	0.39	Colon - Sigmoid	Acyl-CoA dehydrogenase, medium chain, deficiency of, 201450 (3), Autosomal recessive
ACADM	1	76135946	1:76135946	1_76135946_A_G_b37	rs7552404	1.2e-11	-0.66	Brain - Cerebellar Hemisphere	Acyl-CoA dehydrogenase, medium chain, deficiency of, 201450 (3), Autosomal recessive
ACADM	1	76135946	1:76135946	1_76135946_A_G_b37	rs7552404	1.1e-11	0.48	Adrenal Gland	Acyl-CoA dehydrogenase, medium chain, deficiency of, 201450 (3), Autosomal recessive
ACADM	1	76135946	1:76135946	1_76135946_A_G_b37	rs7552404	9.3e-12	0.32	Colon - Transverse	Acyl-CoA dehydrogenase, medium chain, deficiency of, 201450 (3), Autosomal recessive
MSH4	1	76135946	1:76135946	1_76135946_A_G_b37	rs7552404	3.9e-14	0.44	Nerve - Tibial
MSH4	1	76135946	1:76135946	1_76135946_A_G_b37	rs7552404	2.4e-15	0.55	Esophagus - Muscularis
ACADM	1	76135946	1:76135946	1_76135946_A_G_b37	rs7552404	6.2e-18	0.3	Heart - Left Ventricle	Acyl-CoA dehydrogenase, medium chain, deficiency of, 201450 (3), Autosomal recessive
ACADM	1	76135946	1:76135946	1_76135946_A_G_b37	rs7552404	5.8e-18	0.32	Esophagus - Muscularis	Acyl-CoA dehydrogenase, medium chain, deficiency of, 201450 (3), Autosomal recessive
ACADM	1	76135946	1:76135946	1_76135946_A_G_b37	rs7552404	3.4e-19	0.43	Stomach	Acyl-CoA dehydrogenase, medium chain, deficiency of, 201450 (3), Autosomal recessive
ACADM	1	76135946	1:76135946	1_76135946_A_G_b37	rs7552404	3.4e-27	0.36	Heart - Atrial Appendage	Acyl-CoA dehydrogenase, medium chain, deficiency of, 201450 (3), Autosomal recessive
ACADM	1	76135946	1:76135946	1_76135946_A_G_b37	rs7552404	1.6e-30	0.21	Muscle - Skeletal	Acyl-CoA dehydrogenase, medium chain, deficiency of, 201450 (3), Autosomal recessive
MSH4	1	76140273	1:76140273	1_76140273_G_A_b37	rs6593585	4e-07	0.42	Heart - Left Ventricle
ACADM	1	76140273	1:76140273	1_76140273_G_A_b37	rs6593585	3.3e-07	0.19	Skin - Not Sun Exposed (Suprapubic)	Acyl-CoA dehydrogenase, medium chain, deficiency of, 201450 (3), Autosomal recessive
MSH4	1	76140273	1:76140273	1_76140273_G_A_b37	rs6593585	2.9e-07	0.33	Thyroid
ACADM	1	76140273	1:76140273	1_76140273_G_A_b37	rs6593585	1.1e-07	0.26	Testis	Acyl-CoA dehydrogenase, medium chain, deficiency of, 201450 (3), Autosomal recessive
MSH4	1	76140273	1:76140273	1_76140273_G_A_b37	rs6593585	1.1e-07	0.31	Muscle - Skeletal
MSH4	1	76140273	1:76140273	1_76140273_G_A_b37	rs6593585	7.2e-08	0.33	Artery - Tibial
MSH4	1	76140273	1:76140273	1_76140273_G_A_b37	rs6593585	5.8e-08	0.42	Skin - Not Sun Exposed (Suprapubic)
MSH4	1	76140273	1:76140273	1_76140273_G_A_b37	rs6593585	4.5e-08	0.52	Breast - Mammary Tissue
MSH4	1	76140273	1:76140273	1_76140273_G_A_b37	rs6593585	4.4e-08	0.41	Esophagus - Mucosa
ACADM	1	76140273	1:76140273	1_76140273_G_A_b37	rs6593585	4e-08	0.2	Thyroid	Acyl-CoA dehydrogenase, medium chain, deficiency of, 201450 (3), Autosomal recessive
ACADM	1	76140273	1:76140273	1_76140273_G_A_b37	rs6593585	2.2e-08	0.24	Skin - Sun Exposed (Lower leg)	Acyl-CoA dehydrogenase, medium chain, deficiency of, 201450 (3), Autosomal recessive
MSH4	1	76140273	1:76140273	1_76140273_G_A_b37	rs6593585	2.2e-08	0.5	Colon - Sigmoid
MSH4	1	76140273	1:76140273	1_76140273_G_A_b37	rs6593585	1.6e-08	0.49	Esophagus - Gastroesophageal Junction
ACADM	1	76140273	1:76140273	1_76140273_G_A_b37	rs6593585	7.8e-10	-0.54	Brain - Cerebellum	Acyl-CoA dehydrogenase, medium chain, deficiency of, 201450 (3), Autosomal recessive
MSH4	1	76140273	1:76140273	1_76140273_G_A_b37	rs6593585	7.8e-10	0.5	Colon - Transverse
ACADM	1	76140273	1:76140273	1_76140273_G_A_b37	rs6593585	8.8e-11	0.2	Whole Blood	Acyl-CoA dehydrogenase, medium chain, deficiency of, 201450 (3), Autosomal recessive
ACADM	1	76140273	1:76140273	1_76140273_G_A_b37	rs6593585	4.1e-11	0.22	Lung	Acyl-CoA dehydrogenase, medium chain, deficiency of, 201450 (3), Autosomal recessive
ACADM	1	76140273	1:76140273	1_76140273_G_A_b37	rs6593585	2.1e-11	0.48	Adrenal Gland	Acyl-CoA dehydrogenase, medium chain, deficiency of, 201450 (3), Autosomal recessive
ACADM	1	76140273	1:76140273	1_76140273_G_A_b37	rs6593585	1.4e-11	-0.65	Brain - Cerebellar Hemisphere	Acyl-CoA dehydrogenase, medium chain, deficiency of, 201450 (3), Autosomal recessive
ACADM	1	76140273	1:76140273	1_76140273_G_A_b37	rs6593585	1.4e-11	0.32	Colon - Transverse	Acyl-CoA dehydrogenase, medium chain, deficiency of, 201450 (3), Autosomal recessive
ACADM	1	76140273	1:76140273	1_76140273_G_A_b37	rs6593585	1.1e-11	0.39	Colon - Sigmoid	Acyl-CoA dehydrogenase, medium chain, deficiency of, 201450 (3), Autosomal recessive
MSH4	1	76140273	1:76140273	1_76140273_G_A_b37	rs6593585	4e-14	0.44	Nerve - Tibial
MSH4	1	76140273	1:76140273	1_76140273_G_A_b37	rs6593585	3.2e-15	0.54	Esophagus - Muscularis
ACADM	1	76140273	1:76140273	1_76140273_G_A_b37	rs6593585	4.5e-18	0.32	Esophagus - Muscularis	Acyl-CoA dehydrogenase, medium chain, deficiency of, 201450 (3), Autosomal recessive
ACADM	1	76140273	1:76140273	1_76140273_G_A_b37	rs6593585	2.7e-18	0.3	Heart - Left Ventricle	Acyl-CoA dehydrogenase, medium chain, deficiency of, 201450 (3), Autosomal recessive
ACADM	1	76140273	1:76140273	1_76140273_G_A_b37	rs6593585	1.1e-18	0.43	Stomach	Acyl-CoA dehydrogenase, medium chain, deficiency of, 201450 (3), Autosomal recessive
ACADM	1	76140273	1:76140273	1_76140273_G_A_b37	rs6593585	1.1e-26	0.35	Heart - Atrial Appendage	Acyl-CoA dehydrogenase, medium chain, deficiency of, 201450 (3), Autosomal recessive
ACADM	1	76140273	1:76140273	1_76140273_G_A_b37	rs6593585	3.9e-31	0.21	Muscle - Skeletal	Acyl-CoA dehydrogenase, medium chain, deficiency of, 201450 (3), Autosomal recessive
MSH4	1	76166846	1:76166846	1_76166846_C_G_b37	rs7550949	5.1e-07	0.41	Heart - Left Ventricle
ACADM	1	76166846	1:76166846	1_76166846_C_G_b37	rs7550949	3.7e-07	0.19	Skin - Not Sun Exposed (Suprapubic)	Acyl-CoA dehydrogenase, medium chain, deficiency of, 201450 (3), Autosomal recessive
ACADM	1	76166846	1:76166846	1_76166846_C_G_b37	rs7550949	2.4e-07	0.25	Testis	Acyl-CoA dehydrogenase, medium chain, deficiency of, 201450 (3), Autosomal recessive
MSH4	1	76166846	1:76166846	1_76166846_C_G_b37	rs7550949	2.1e-07	0.34	Thyroid
MSH4	1	76166846	1:76166846	1_76166846_C_G_b37	rs7550949	1.4e-07	0.31	Muscle - Skeletal
MSH4	1	76166846	1:76166846	1_76166846_C_G_b37	rs7550949	1.3e-07	0.32	Artery - Tibial
MSH4	1	76166846	1:76166846	1_76166846_C_G_b37	rs7550949	8.5e-08	0.41	Skin - Not Sun Exposed (Suprapubic)
MSH4	1	76166846	1:76166846	1_76166846_C_G_b37	rs7550949	5.6e-08	0.51	Breast - Mammary Tissue
MSH4	1	76166846	1:76166846	1_76166846_C_G_b37	rs7550949	3.9e-08	0.41	Esophagus - Mucosa
ACADM	1	76166846	1:76166846	1_76166846_C_G_b37	rs7550949	2.6e-08	0.21	Thyroid	Acyl-CoA dehydrogenase, medium chain, deficiency of, 201450 (3), Autosomal recessive
ACADM	1	76166846	1:76166846	1_76166846_C_G_b37	rs7550949	2.2e-08	0.24	Skin - Sun Exposed (Lower leg)	Acyl-CoA dehydrogenase, medium chain, deficiency of, 201450 (3), Autosomal recessive
MSH4	1	76166846	1:76166846	1_76166846_C_G_b37	rs7550949	1.9e-08	0.5	Colon - Sigmoid
MSH4	1	76166846	1:76166846	1_76166846_C_G_b37	rs7550949	1.6e-08	0.49	Esophagus - Gastroesophageal Junction
ACADM	1	76166846	1:76166846	1_76166846_C_G_b37	rs7550949	2e-09	-0.53	Brain - Cerebellum	Acyl-CoA dehydrogenase, medium chain, deficiency of, 201450 (3), Autosomal recessive
MSH4	1	76166846	1:76166846	1_76166846_C_G_b37	rs7550949	7.6e-10	0.5	Colon - Transverse
ACADM	1	76166846	1:76166846	1_76166846_C_G_b37	rs7550949	5.1e-11	0.21	Whole Blood	Acyl-CoA dehydrogenase, medium chain, deficiency of, 201450 (3), Autosomal recessive
ACADM	1	76166846	1:76166846	1_76166846_C_G_b37	rs7550949	3.1e-11	0.22	Lung	Acyl-CoA dehydrogenase, medium chain, deficiency of, 201450 (3), Autosomal recessive
ACADM	1	76166846	1:76166846	1_76166846_C_G_b37	rs7550949	2.2e-11	0.48	Adrenal Gland	Acyl-CoA dehydrogenase, medium chain, deficiency of, 201450 (3), Autosomal recessive
ACADM	1	76166846	1:76166846	1_76166846_C_G_b37	rs7550949	1.4e-11	-0.65	Brain - Cerebellar Hemisphere	Acyl-CoA dehydrogenase, medium chain, deficiency of, 201450 (3), Autosomal recessive
ACADM	1	76166846	1:76166846	1_76166846_C_G_b37	rs7550949	1.4e-11	0.39	Colon - Sigmoid	Acyl-CoA dehydrogenase, medium chain, deficiency of, 201450 (3), Autosomal recessive
ACADM	1	76166846	1:76166846	1_76166846_C_G_b37	rs7550949	1.2e-11	0.32	Colon - Transverse	Acyl-CoA dehydrogenase, medium chain, deficiency of, 201450 (3), Autosomal recessive
MSH4	1	76166846	1:76166846	1_76166846_C_G_b37	rs7550949	2.9e-14	0.44	Nerve - Tibial
MSH4	1	76166846	1:76166846	1_76166846_C_G_b37	rs7550949	1.6e-15	0.55	Esophagus - Muscularis
ACADM	1	76166846	1:76166846	1_76166846_C_G_b37	rs7550949	7.6e-18	0.32	Esophagus - Muscularis	Acyl-CoA dehydrogenase, medium chain, deficiency of, 201450 (3), Autosomal recessive
ACADM	1	76166846	1:76166846	1_76166846_C_G_b37	rs7550949	7.4e-18	0.29	Heart - Left Ventricle	Acyl-CoA dehydrogenase, medium chain, deficiency of, 201450 (3), Autosomal recessive
ACADM	1	76166846	1:76166846	1_76166846_C_G_b37	rs7550949	4.1e-19	0.43	Stomach	Acyl-CoA dehydrogenase, medium chain, deficiency of, 201450 (3), Autosomal recessive
ACADM	1	76166846	1:76166846	1_76166846_C_G_b37	rs7550949	6.5e-27	0.35	Heart - Atrial Appendage	Acyl-CoA dehydrogenase, medium chain, deficiency of, 201450 (3), Autosomal recessive
ACADM	1	76166846	1:76166846	1_76166846_C_G_b37	rs7550949	3.2e-31	0.21	Muscle - Skeletal	Acyl-CoA dehydrogenase, medium chain, deficiency of, 201450 (3), Autosomal recessive
MSH4	1	76167924	1:76167924	1_76167924_T_C_b37	rs76963882	4e-07	0.39	Adipose - Visceral (Omentum)
MSH4	1	76167924	1:76167924	1_76167924_T_C_b37	rs76963882	3.9e-07	0.41	Heart - Left Ventricle
ACADM	1	76167924	1:76167924	1_76167924_T_C_b37	rs76963882	2.9e-07	0.19	Skin - Not Sun Exposed (Suprapubic)	Acyl-CoA dehydrogenase, medium chain, deficiency of, 201450 (3), Autosomal recessive
MSH4	1	76167924	1:76167924	1_76167924_T_C_b37	rs76963882	1.8e-07	0.34	Thyroid
ACADM	1	76167924	1:76167924	1_76167924_T_C_b37	rs76963882	1.6e-07	0.25	Testis	Acyl-CoA dehydrogenase, medium chain, deficiency of, 201450 (3), Autosomal recessive
ACADM	1	76167924	1:76167924	1_76167924_T_C_b37	rs76963882	1.2e-07	0.2	Thyroid	Acyl-CoA dehydrogenase, medium chain, deficiency of, 201450 (3), Autosomal recessive
MSH4	1	76167924	1:76167924	1_76167924_T_C_b37	rs76963882	1e-07	0.32	Artery - Tibial
MSH4	1	76167924	1:76167924	1_76167924_T_C_b37	rs76963882	6.3e-08	0.32	Muscle - Skeletal
ACADM	1	76167924	1:76167924	1_76167924_T_C_b37	rs76963882	4.6e-08	0.23	Skin - Sun Exposed (Lower leg)	Acyl-CoA dehydrogenase, medium chain, deficiency of, 201450 (3), Autosomal recessive
MSH4	1	76167924	1:76167924	1_76167924_T_C_b37	rs76963882	3.6e-08	0.42	Esophagus - Mucosa
MSH4	1	76167924	1:76167924	1_76167924_T_C_b37	rs76963882	3.6e-08	0.42	Skin - Not Sun Exposed (Suprapubic)
MSH4	1	76167924	1:76167924	1_76167924_T_C_b37	rs76963882	3.5e-08	0.53	Breast - Mammary Tissue
MSH4	1	76167924	1:76167924	1_76167924_T_C_b37	rs76963882	1.6e-08	0.49	Esophagus - Gastroesophageal Junction
MSH4	1	76167924	1:76167924	1_76167924_T_C_b37	rs76963882	7.5e-09	0.51	Colon - Sigmoid
ACADM	1	76167924	1:76167924	1_76167924_T_C_b37	rs76963882	2e-09	-0.53	Brain - Cerebellum	Acyl-CoA dehydrogenase, medium chain, deficiency of, 201450 (3), Autosomal recessive
MSH4	1	76167924	1:76167924	1_76167924_T_C_b37	rs76963882	7.9e-10	0.5	Colon - Transverse
ACADM	1	76167924	1:76167924	1_76167924_T_C_b37	rs76963882	1.6e-10	0.37	Colon - Sigmoid	Acyl-CoA dehydrogenase, medium chain, deficiency of, 201450 (3), Autosomal recessive
ACADM	1	76167924	1:76167924	1_76167924_T_C_b37	rs76963882	9.9e-11	0.22	Lung	Acyl-CoA dehydrogenase, medium chain, deficiency of, 201450 (3), Autosomal recessive
ACADM	1	76167924	1:76167924	1_76167924_T_C_b37	rs76963882	4.8e-11	0.21	Whole Blood	Acyl-CoA dehydrogenase, medium chain, deficiency of, 201450 (3), Autosomal recessive
ACADM	1	76167924	1:76167924	1_76167924_T_C_b37	rs76963882	2.2e-11	0.48	Adrenal Gland	Acyl-CoA dehydrogenase, medium chain, deficiency of, 201450 (3), Autosomal recessive
ACADM	1	76167924	1:76167924	1_76167924_T_C_b37	rs76963882	1.4e-11	-0.65	Brain - Cerebellar Hemisphere	Acyl-CoA dehydrogenase, medium chain, deficiency of, 201450 (3), Autosomal recessive
ACADM	1	76167924	1:76167924	1_76167924_T_C_b37	rs76963882	9.3e-12	0.32	Colon - Transverse	Acyl-CoA dehydrogenase, medium chain, deficiency of, 201450 (3), Autosomal recessive
MSH4	1	76167924	1:76167924	1_76167924_T_C_b37	rs76963882	2.9e-14	0.44	Nerve - Tibial
MSH4	1	76167924	1:76167924	1_76167924_T_C_b37	rs76963882	1.1e-15	0.55	Esophagus - Muscularis
ACADM	1	76167924	1:76167924	1_76167924_T_C_b37	rs76963882	8.8e-18	0.32	Esophagus - Muscularis	Acyl-CoA dehydrogenase, medium chain, deficiency of, 201450 (3), Autosomal recessive
ACADM	1	76167924	1:76167924	1_76167924_T_C_b37	rs76963882	7.1e-18	0.29	Heart - Left Ventricle	Acyl-CoA dehydrogenase, medium chain, deficiency of, 201450 (3), Autosomal recessive
ACADM	1	76167924	1:76167924	1_76167924_T_C_b37	rs76963882	3.4e-19	0.43	Stomach	Acyl-CoA dehydrogenase, medium chain, deficiency of, 201450 (3), Autosomal recessive
ACADM	1	76167924	1:76167924	1_76167924_T_C_b37	rs76963882	1.9e-25	0.35	Heart - Atrial Appendage	Acyl-CoA dehydrogenase, medium chain, deficiency of, 201450 (3), Autosomal recessive
ACADM	1	76167924	1:76167924	1_76167924_T_C_b37	rs76963882	1.4e-30	0.21	Muscle - Skeletal	Acyl-CoA dehydrogenase, medium chain, deficiency of, 201450 (3), Autosomal recessive
ACADM	1	76177332	1:76177332	1_76177332_G_A_b37	rs942270	7.5e-07	0.18	Skin - Not Sun Exposed (Suprapubic)	Acyl-CoA dehydrogenase, medium chain, deficiency of, 201450 (3), Autosomal recessive
ACADM	1	76177332	1:76177332	1_76177332_G_A_b37	rs942270	4.7e-07	0.24	Testis	Acyl-CoA dehydrogenase, medium chain, deficiency of, 201450 (3), Autosomal recessive
MSH4	1	76177332	1:76177332	1_76177332_G_A_b37	rs942270	3.6e-07	0.42	Heart - Left Ventricle
MSH4	1	76177332	1:76177332	1_76177332_G_A_b37	rs942270	3.1e-07	0.31	Artery - Tibial
MSH4	1	76177332	1:76177332	1_76177332_G_A_b37	rs942270	2.3e-07	0.4	Adipose - Visceral (Omentum)
ACADM	1	76177332	1:76177332	1_76177332_G_A_b37	rs942270	2.2e-07	-0.47	Brain - Cerebellum	Acyl-CoA dehydrogenase, medium chain, deficiency of, 201450 (3), Autosomal recessive
MSH4	1	76177332	1:76177332	1_76177332_G_A_b37	rs942270	1.4e-07	0.4	Skin - Not Sun Exposed (Suprapubic)
MSH4	1	76177332	1:76177332	1_76177332_G_A_b37	rs942270	1.3e-07	0.34	Thyroid
ACADM	1	76177332	1:76177332	1_76177332_G_A_b37	rs942270	6.5e-08	0.23	Skin - Sun Exposed (Lower leg)	Acyl-CoA dehydrogenase, medium chain, deficiency of, 201450 (3), Autosomal recessive
MSH4	1	76177332	1:76177332	1_76177332_G_A_b37	rs942270	6.5e-08	0.31	Muscle - Skeletal
MSH4	1	76177332	1:76177332	1_76177332_G_A_b37	rs942270	5.4e-08	0.52	Breast - Mammary Tissue
MSH4	1	76177332	1:76177332	1_76177332_G_A_b37	rs942270	1.9e-08	0.42	Esophagus - Mucosa
MSH4	1	76177332	1:76177332	1_76177332_G_A_b37	rs942270	1.1e-08	0.5	Esophagus - Gastroesophageal Junction
MSH4	1	76177332	1:76177332	1_76177332_G_A_b37	rs942270	1e-08	0.51	Colon - Sigmoid
ACADM	1	76177332	1:76177332	1_76177332_G_A_b37	rs942270	8.1e-09	0.21	Thyroid	Acyl-CoA dehydrogenase, medium chain, deficiency of, 201450 (3), Autosomal recessive
ACADM	1	76177332	1:76177332	1_76177332_G_A_b37	rs942270	1.1e-09	-0.59	Brain - Cerebellar Hemisphere	Acyl-CoA dehydrogenase, medium chain, deficiency of, 201450 (3), Autosomal recessive
MSH4	1	76177332	1:76177332	1_76177332_G_A_b37	rs942270	9.5e-10	0.5	Colon - Transverse
ACADM	1	76177332	1:76177332	1_76177332_G_A_b37	rs942270	6.6e-11	0.21	Whole Blood	Acyl-CoA dehydrogenase, medium chain, deficiency of, 201450 (3), Autosomal recessive
ACADM	1	76177332	1:76177332	1_76177332_G_A_b37	rs942270	4e-11	0.22	Lung	Acyl-CoA dehydrogenase, medium chain, deficiency of, 201450 (3), Autosomal recessive
ACADM	1	76177332	1:76177332	1_76177332_G_A_b37	rs942270	2.4e-11	0.32	Colon - Transverse	Acyl-CoA dehydrogenase, medium chain, deficiency of, 201450 (3), Autosomal recessive
ACADM	1	76177332	1:76177332	1_76177332_G_A_b37	rs942270	1.8e-11	0.48	Adrenal Gland	Acyl-CoA dehydrogenase, medium chain, deficiency of, 201450 (3), Autosomal recessive
ACADM	1	76177332	1:76177332	1_76177332_G_A_b37	rs942270	8.7e-12	0.39	Colon - Sigmoid	Acyl-CoA dehydrogenase, medium chain, deficiency of, 201450 (3), Autosomal recessive
MSH4	1	76177332	1:76177332	1_76177332_G_A_b37	rs942270	6.7e-14	0.43	Nerve - Tibial
MSH4	1	76177332	1:76177332	1_76177332_G_A_b37	rs942270	7.1e-16	0.55	Esophagus - Muscularis
ACADM	1	76177332	1:76177332	1_76177332_G_A_b37	rs942270	6.9e-17	0.41	Stomach	Acyl-CoA dehydrogenase, medium chain, deficiency of, 201450 (3), Autosomal recessive
ACADM	1	76177332	1:76177332	1_76177332_G_A_b37	rs942270	2.9e-17	0.29	Heart - Left Ventricle	Acyl-CoA dehydrogenase, medium chain, deficiency of, 201450 (3), Autosomal recessive
ACADM	1	76177332	1:76177332	1_76177332_G_A_b37	rs942270	2.7e-17	0.31	Esophagus - Muscularis	Acyl-CoA dehydrogenase, medium chain, deficiency of, 201450 (3), Autosomal recessive
ACADM	1	76177332	1:76177332	1_76177332_G_A_b37	rs942270	9.3e-25	0.34	Heart - Atrial Appendage	Acyl-CoA dehydrogenase, medium chain, deficiency of, 201450 (3), Autosomal recessive
ACADM	1	76177332	1:76177332	1_76177332_G_A_b37	rs942270	2.7e-30	0.21	Muscle - Skeletal	Acyl-CoA dehydrogenase, medium chain, deficiency of, 201450 (3), Autosomal recessive
MSH4	1	76249590	1:76249590	1_76249590_G_A_b37	rs12094842	7.9e-07	0.4	Heart - Left Ventricle
MSH4	1	76249590	1:76249590	1_76249590_G_A_b37	rs12094842	7.6e-07	0.3	Adipose - Subcutaneous
MSH4	1	76249590	1:76249590	1_76249590_G_A_b37	rs12094842	2.7e-07	0.4	Adipose - Visceral (Omentum)
MSH4	1	76249590	1:76249590	1_76249590_G_A_b37	rs12094842	2.5e-07	0.31	Artery - Tibial
MSH4	1	76249590	1:76249590	1_76249590_G_A_b37	rs12094842	2.4e-07	0.39	Skin - Not Sun Exposed (Suprapubic)
MSH4	1	76249590	1:76249590	1_76249590_G_A_b37	rs12094842	2.3e-07	0.68	Brain - Hippocampus
ACADM	1	76249590	1:76249590	1_76249590_G_A_b37	rs12094842	8.2e-08	-0.5	Brain - Cerebellum	Acyl-CoA dehydrogenase, medium chain, deficiency of, 201450 (3), Autosomal recessive
ACADM	1	76249590	1:76249590	1_76249590_G_A_b37	rs12094842	6.8e-08	0.23	Skin - Sun Exposed (Lower leg)	Acyl-CoA dehydrogenase, medium chain, deficiency of, 201450 (3), Autosomal recessive
MSH4	1	76249590	1:76249590	1_76249590_G_A_b37	rs12094842	4.6e-08	0.51	Breast - Mammary Tissue
ACADM	1	76249590	1:76249590	1_76249590_G_A_b37	rs12094842	4.4e-08	0.26	Testis	Acyl-CoA dehydrogenase, medium chain, deficiency of, 201450 (3), Autosomal recessive
ACADM	1	76249590	1:76249590	1_76249590_G_A_b37	rs12094842	3.6e-08	0.2	Thyroid	Acyl-CoA dehydrogenase, medium chain, deficiency of, 201450 (3), Autosomal recessive
MSH4	1	76249590	1:76249590	1_76249590_G_A_b37	rs12094842	3e-08	0.48	Esophagus - Gastroesophageal Junction
MSH4	1	76249590	1:76249590	1_76249590_G_A_b37	rs12094842	2e-08	0.36	Thyroid
MSH4	1	76249590	1:76249590	1_76249590_G_A_b37	rs12094842	8.4e-09	0.33	Muscle - Skeletal
MSH4	1	76249590	1:76249590	1_76249590_G_A_b37	rs12094842	3.7e-09	0.52	Colon - Sigmoid
MSH4	1	76249590	1:76249590	1_76249590_G_A_b37	rs12094842	3.7e-09	0.44	Esophagus - Mucosa
MSH4	1	76249590	1:76249590	1_76249590_G_A_b37	rs12094842	1e-09	0.49	Colon - Transverse
ACADM	1	76249590	1:76249590	1_76249590_G_A_b37	rs12094842	2e-10	0.2	Whole Blood	Acyl-CoA dehydrogenase, medium chain, deficiency of, 201450 (3), Autosomal recessive
ACADM	1	76249590	1:76249590	1_76249590_G_A_b37	rs12094842	1.2e-10	0.3	Colon - Transverse	Acyl-CoA dehydrogenase, medium chain, deficiency of, 201450 (3), Autosomal recessive
ACADM	1	76249590	1:76249590	1_76249590_G_A_b37	rs12094842	8.8e-11	0.46	Adrenal Gland	Acyl-CoA dehydrogenase, medium chain, deficiency of, 201450 (3), Autosomal recessive
ACADM	1	76249590	1:76249590	1_76249590_G_A_b37	rs12094842	6.7e-11	0.38	Colon - Sigmoid	Acyl-CoA dehydrogenase, medium chain, deficiency of, 201450 (3), Autosomal recessive
ACADM	1	76249590	1:76249590	1_76249590_G_A_b37	rs12094842	1.4e-11	0.23	Lung	Acyl-CoA dehydrogenase, medium chain, deficiency of, 201450 (3), Autosomal recessive
ACADM	1	76249590	1:76249590	1_76249590_G_A_b37	rs12094842	2.2e-12	-0.66	Brain - Cerebellar Hemisphere	Acyl-CoA dehydrogenase, medium chain, deficiency of, 201450 (3), Autosomal recessive
MSH4	1	76249590	1:76249590	1_76249590_G_A_b37	rs12094842	1.4e-14	0.44	Nerve - Tibial
MSH4	1	76249590	1:76249590	1_76249590_G_A_b37	rs12094842	4.4e-16	0.56	Esophagus - Muscularis
ACADM	1	76249590	1:76249590	1_76249590_G_A_b37	rs12094842	3.2e-17	0.41	Stomach	Acyl-CoA dehydrogenase, medium chain, deficiency of, 201450 (3), Autosomal recessive
ACADM	1	76249590	1:76249590	1_76249590_G_A_b37	rs12094842	1.4e-17	0.29	Heart - Left Ventricle	Acyl-CoA dehydrogenase, medium chain, deficiency of, 201450 (3), Autosomal recessive
ACADM	1	76249590	1:76249590	1_76249590_G_A_b37	rs12094842	2.8e-18	0.32	Esophagus - Muscularis	Acyl-CoA dehydrogenase, medium chain, deficiency of, 201450 (3), Autosomal recessive
ACADM	1	76249590	1:76249590	1_76249590_G_A_b37	rs12094842	1.3e-23	0.34	Heart - Atrial Appendage	Acyl-CoA dehydrogenase, medium chain, deficiency of, 201450 (3), Autosomal recessive
ACADM	1	76249590	1:76249590	1_76249590_G_A_b37	rs12094842	3e-28	0.2	Muscle - Skeletal	Acyl-CoA dehydrogenase, medium chain, deficiency of, 201450 (3), Autosomal recessive
DDAH1	1	85844671	1:85844671	1_85844671_T_C_b37	rs2011825	7.4e-08	0.19	Esophagus - Mucosa
RP11-131L23.1	1	85844671	1:85844671	1_85844671_T_C_b37	rs2011825	2.6e-09	0.21	Testis
DDAH1	1	85844671	1:85844671	1_85844671_T_C_b37	rs2011825	1.3e-13	0.51	Adrenal Gland
DDAH1	1	85844671	1:85844671	1_85844671_T_C_b37	rs2011825	3.1e-31	-0.8	Liver
CCBL2	1	89402379	1:89402379	1_89402379_GC_G_b37	rs397860929	9e-07	0.23	Heart - Left Ventricle
CCBL2	1	89402379	1:89402379	1_89402379_GC_G_b37	rs397860929	1.9e-07	0.53	Minor Salivary Gland
CCBL2	1	89402379	1:89402379	1_89402379_GC_G_b37	rs397860929	8.9e-08	0.36	Artery - Coronary
CCBL2	1	89402379	1:89402379	1_89402379_GC_G_b37	rs397860929	5.2e-08	0.61	Brain - Amygdala
CCBL2	1	89402379	1:89402379	1_89402379_GC_G_b37	rs397860929	4.3e-08	0.54	Brain - Substantia nigra
CCBL2	1	89402379	1:89402379	1_89402379_GC_G_b37	rs397860929	1.4e-08	0.45	Brain - Cerebellar Hemisphere
CCBL2	1	89402379	1:89402379	1_89402379_GC_G_b37	rs397860929	3.8e-09	0.3	Stomach
CCBL2	1	89402379	1:89402379	1_89402379_GC_G_b37	rs397860929	5.5e-11	0.59	Brain - Hypothalamus
CCBL2	1	89402379	1:89402379	1_89402379_GC_G_b37	rs397860929	4e-11	0.31	Skin - Not Sun Exposed (Suprapubic)
CCBL2	1	89402379	1:89402379	1_89402379_GC_G_b37	rs397860929	1.5e-11	0.63	Brain - Hippocampus
CCBL2	1	89402379	1:89402379	1_89402379_GC_G_b37	rs397860929	3.9e-12	0.37	Esophagus - Gastroesophageal Junction
CCBL2	1	89402379	1:89402379	1_89402379_GC_G_b37	rs397860929	1.3e-12	0.48	Pituitary
CCBL2	1	89402379	1:89402379	1_89402379_GC_G_b37	rs397860929	1.7e-13	0.68	Ovary
CCBL2	1	89402379	1:89402379	1_89402379_GC_G_b37	rs397860929	8.4e-14	0.34	Breast - Mammary Tissue
CCBL2	1	89402379	1:89402379	1_89402379_GC_G_b37	rs397860929	1.5e-14	0.42	Colon - Sigmoid
CCBL2	1	89402379	1:89402379	1_89402379_GC_G_b37	rs397860929	6.8e-15	0.62	Adrenal Gland
CCBL2	1	89402379	1:89402379	1_89402379_GC_G_b37	rs397860929	2.1e-15	0.73	Brain - Anterior cingulate cortex (BA24)
CCBL2	1	89402379	1:89402379	1_89402379_GC_G_b37	rs397860929	1.1e-15	0.54	Brain - Cerebellum
CCBL2	1	89402379	1:89402379	1_89402379_GC_G_b37	rs397860929	1e-15	0.59	Brain - Caudate (basal ganglia)
CCBL2	1	89402379	1:89402379	1_89402379_GC_G_b37	rs397860929	2e-16	0.71	Brain - Putamen (basal ganglia)
CCBL2	1	89402379	1:89402379	1_89402379_GC_G_b37	rs397860929	1e-16	0.25	Whole Blood
CCBL2	1	89402379	1:89402379	1_89402379_GC_G_b37	rs397860929	7.4e-18	0.33	Artery - Aorta
CCBL2	1	89402379	1:89402379	1_89402379_GC_G_b37	rs397860929	3.3e-18	0.36	Skin - Sun Exposed (Lower leg)
CCBL2	1	89402379	1:89402379	1_89402379_GC_G_b37	rs397860929	4.6e-19	0.35	Lung
CCBL2	1	89402379	1:89402379	1_89402379_GC_G_b37	rs397860929	3e-20	0.72	Brain - Frontal Cortex (BA9)
CCBL2	1	89402379	1:89402379	1_89402379_GC_G_b37	rs397860929	7.3e-21	0.48	Heart - Atrial Appendage
CCBL2	1	89402379	1:89402379	1_89402379_GC_G_b37	rs397860929	2.2e-21	0.49	Colon - Transverse
CCBL2	1	89402379	1:89402379	1_89402379_GC_G_b37	rs397860929	3.7e-23	0.87	Brain - Nucleus accumbens (basal ganglia)
CCBL2	1	89402379	1:89402379	1_89402379_GC_G_b37	rs397860929	9.5e-24	0.34	Esophagus - Mucosa
CCBL2	1	89402379	1:89402379	1_89402379_GC_G_b37	rs397860929	1.5e-24	0.86	Brain - Cortex
CCBL2	1	89402379	1:89402379	1_89402379_GC_G_b37	rs397860929	6.7e-25	0.43	Thyroid
CCBL2	1	89402379	1:89402379	1_89402379_GC_G_b37	rs397860929	2.2e-27	0.42	Adipose - Visceral (Omentum)
CCBL2	1	89402379	1:89402379	1_89402379_GC_G_b37	rs397860929	3.4e-29	0.39	Esophagus - Muscularis
CCBL2	1	89402379	1:89402379	1_89402379_GC_G_b37	rs397860929	6e-30	0.39	Muscle - Skeletal
CCBL2	1	89402379	1:89402379	1_89402379_GC_G_b37	rs397860929	8.9e-32	0.48	Adipose - Subcutaneous
CCBL2	1	89402379	1:89402379	1_89402379_GC_G_b37	rs397860929	1.9e-33	0.35	Artery - Tibial
CCBL2	1	89402379	1:89402379	1_89402379_GC_G_b37	rs397860929	2.2e-41	0.46	Nerve - Tibial
CCBL2	1	89402379	1:89402379	1_89402379_GC_G_b37	rs397860929	1.3e-46	0.59	Testis
CCBL2	1	89402379	1:89402379	1_89402379_GC_G_b37	rs397860929	2.6e-71	0.71	Cells - Transformed fibroblasts
GBP3	1	89442733	1:89442733	1_89442733_C_T_b37	rs10922532	7.7e-07	-0.27	Adipose - Subcutaneous
GBP3	1	89442733	1:89442733	1_89442733_C_T_b37	rs10922532	4.5e-07	-0.39	Cells - Transformed fibroblasts
GBP3	1	89442733	1:89442733	1_89442733_C_T_b37	rs10922532	4.3e-07	-0.19	Whole Blood
GBP3	1	89442733	1:89442733	1_89442733_C_T_b37	rs10922532	2.2e-07	-0.24	Lung
GBP3	1	89442733	1:89442733	1_89442733_C_T_b37	rs10922532	1.1e-07	-0.28	Nerve - Tibial
CCBL2	1	89442733	1:89442733	1_89442733_C_T_b37	rs10922532	5.7e-08	-0.53	Small Intestine - Terminal Ileum
CCBL2	1	89442733	1:89442733	1_89442733_C_T_b37	rs10922532	9.8e-09	-0.55	Minor Salivary Gland
CCBL2	1	89442733	1:89442733	1_89442733_C_T_b37	rs10922532	8.7e-09	-0.32	Stomach
CCBL2	1	89442733	1:89442733	1_89442733_C_T_b37	rs10922532	6.8e-09	-0.29	Skin - Not Sun Exposed (Suprapubic)
CCBL2	1	89442733	1:89442733	1_89442733_C_T_b37	rs10922532	2.7e-09	-0.52	Brain - Substantia nigra
CCBL2	1	89442733	1:89442733	1_89442733_C_T_b37	rs10922532	1.2e-09	-0.46	Brain - Cerebellar Hemisphere
CCBL2	1	89442733	1:89442733	1_89442733_C_T_b37	rs10922532	1.1e-09	-0.55	Brain - Hippocampus
CCBL2	1	89442733	1:89442733	1_89442733_C_T_b37	rs10922532	8.8e-10	-0.35	Esophagus - Gastroesophageal Junction
CCBL2	1	89442733	1:89442733	1_89442733_C_T_b37	rs10922532	8.4e-10	-0.3	Breast - Mammary Tissue
CCBL2	1	89442733	1:89442733	1_89442733_C_T_b37	rs10922532	1.6e-10	-0.55	Brain - Putamen (basal ganglia)
CCBL2	1	89442733	1:89442733	1_89442733_C_T_b37	rs10922532	1.5e-10	-0.6	Ovary
CCBL2	1	89442733	1:89442733	1_89442733_C_T_b37	rs10922532	1.4e-10	-0.54	Brain - Hypothalamus
CCBL2	1	89442733	1:89442733	1_89442733_C_T_b37	rs10922532	6.3e-11	-0.69	Brain - Amygdala
CCBL2	1	89442733	1:89442733	1_89442733_C_T_b37	rs10922532	4.8e-11	-0.65	Brain - Anterior cingulate cortex (BA24)
CCBL2	1	89442733	1:89442733	1_89442733_C_T_b37	rs10922532	1.8e-11	-0.21	Whole Blood
CCBL2	1	89442733	1:89442733	1_89442733_C_T_b37	rs10922532	6.5e-13	-0.39	Colon - Sigmoid
CCBL2	1	89442733	1:89442733	1_89442733_C_T_b37	rs10922532	3.2e-13	-0.5	Brain - Cerebellum
CCBL2	1	89442733	1:89442733	1_89442733_C_T_b37	rs10922532	1e-13	-0.61	Adrenal Gland
CCBL2	1	89442733	1:89442733	1_89442733_C_T_b37	rs10922532	9.1e-15	-0.32	Lung
CCBL2	1	89442733	1:89442733	1_89442733_C_T_b37	rs10922532	2.3e-15	-0.64	Brain - Frontal Cortex (BA9)
CCBL2	1	89442733	1:89442733	1_89442733_C_T_b37	rs10922532	3.2e-16	-0.57	Brain - Caudate (basal ganglia)
CCBL2	1	89442733	1:89442733	1_89442733_C_T_b37	rs10922532	1.7e-16	-0.52	Pituitary
CCBL2	1	89442733	1:89442733	1_89442733_C_T_b37	rs10922532	7.3e-17	-0.34	Artery - Aorta
CCBL2	1	89442733	1:89442733	1_89442733_C_T_b37	rs10922532	5.1e-18	-0.5	Colon - Transverse
CCBL2	1	89442733	1:89442733	1_89442733_C_T_b37	rs10922532	3.1e-18	-0.75	Brain - Nucleus accumbens (basal ganglia)
CCBL2	1	89442733	1:89442733	1_89442733_C_T_b37	rs10922532	1.2e-18	-0.37	Skin - Sun Exposed (Lower leg)
CCBL2	1	89442733	1:89442733	1_89442733_C_T_b37	rs10922532	1.5e-19	-0.34	Esophagus - Mucosa
CCBL2	1	89442733	1:89442733	1_89442733_C_T_b37	rs10922532	1.7e-20	-0.5	Pancreas
CCBL2	1	89442733	1:89442733	1_89442733_C_T_b37	rs10922532	5.1e-21	-0.5	Heart - Atrial Appendage
CCBL2	1	89442733	1:89442733	1_89442733_C_T_b37	rs10922532	2.5e-22	-0.43	Adipose - Subcutaneous
CCBL2	1	89442733	1:89442733	1_89442733_C_T_b37	rs10922532	2.1e-22	-0.39	Adipose - Visceral (Omentum)
CCBL2	1	89442733	1:89442733	1_89442733_C_T_b37	rs10922532	9e-23	-0.8	Brain - Cortex
CCBL2	1	89442733	1:89442733	1_89442733_C_T_b37	rs10922532	3.8e-23	-0.35	Muscle - Skeletal
CCBL2	1	89442733	1:89442733	1_89442733_C_T_b37	rs10922532	3.2e-24	-0.38	Esophagus - Muscularis
CCBL2	1	89442733	1:89442733	1_89442733_C_T_b37	rs10922532	1.4e-25	-0.44	Thyroid
CCBL2	1	89442733	1:89442733	1_89442733_C_T_b37	rs10922532	1.9e-28	-0.41	Nerve - Tibial
CCBL2	1	89442733	1:89442733	1_89442733_C_T_b37	rs10922532	3.1e-29	-0.54	Testis
CCBL2	1	89442733	1:89442733	1_89442733_C_T_b37	rs10922532	1.2e-29	-0.35	Artery - Tibial
CCBL2	1	89442733	1:89442733	1_89442733_C_T_b37	rs10922532	6e-52	-0.68	Cells - Transformed fibroblasts
HAO2	1	119923531	1:119923531	1_119923531_A_C_b37	rs2224995	6.4e-09	-0.45	Adrenal Gland
PHGDH	1	120257576	1:120257576	1_120257576_A_G_b37	rs477992	6.8e-05	-0.13	Skin - Not Sun Exposed (Suprapubic)	Neu-Laxova syndrome 1, 256520 (3), Autosomal recessive; Phosphoglycerate dehydrogenase deficiency, 601815 (3), Autosomal recessive
PHGDH	1	120257576	1:120257576	1_120257576_A_G_b37	rs477992	2.2e-22	0.64	Testis	Neu-Laxova syndrome 1, 256520 (3), Autosomal recessive; Phosphoglycerate dehydrogenase deficiency, 601815 (3), Autosomal recessive
ACP6	1	147129014	1:147129014	1_147129014_A_G_b37	rs12119079	4.6e-08	-0.47	Brain - Cerebellar Hemisphere
ACP6	1	147129014	1:147129014	1_147129014_A_G_b37	rs12119079	2.9e-08	-0.45	Vagina
ACP6	1	147129014	1:147129014	1_147129014_A_G_b37	rs12119079	2.6e-08	-0.22	Whole Blood
ACP6	1	147129014	1:147129014	1_147129014_A_G_b37	rs12119079	9e-09	-0.71	Cells - EBV-transformed lymphocytes
ACP6	1	147129014	1:147129014	1_147129014_A_G_b37	rs12119079	1.3e-09	-0.6	Minor Salivary Gland
ACP6	1	147129014	1:147129014	1_147129014_A_G_b37	rs12119079	7e-11	-0.55	Brain - Cerebellum
ACP6	1	147129014	1:147129014	1_147129014_A_G_b37	rs12119079	2.3e-11	-0.76	Brain - Spinal cord (cervical c-1)
ACP6	1	147129014	1:147129014	1_147129014_A_G_b37	rs12119079	1e-11	-0.55	Ovary
ACP6	1	147129014	1:147129014	1_147129014_A_G_b37	rs12119079	2.2e-12	-0.62	Brain - Anterior cingulate cortex (BA24)
ACP6	1	147129014	1:147129014	1_147129014_A_G_b37	rs12119079	5.1e-14	-0.54	Prostate
ACP6	1	147129014	1:147129014	1_147129014_A_G_b37	rs12119079	7.3e-15	-0.95	Brain - Substantia nigra
ACP6	1	147129014	1:147129014	1_147129014_A_G_b37	rs12119079	8.2e-16	-0.79	Spleen
ACP6	1	147129014	1:147129014	1_147129014_A_G_b37	rs12119079	4.9e-17	-0.77	Small Intestine - Terminal Ileum
ACP6	1	147129014	1:147129014	1_147129014_A_G_b37	rs12119079	1.9e-17	-0.36	Breast - Mammary Tissue
ACP6	1	147129014	1:147129014	1_147129014_A_G_b37	rs12119079	1.2e-17	-0.81	Brain - Amygdala
ACP6	1	147129014	1:147129014	1_147129014_A_G_b37	rs12119079	3.1e-18	-0.49	Artery - Coronary
ACP6	1	147129014	1:147129014	1_147129014_A_G_b37	rs12119079	1.5e-18	-0.86	Brain - Hypothalamus
ACP6	1	147129014	1:147129014	1_147129014_A_G_b37	rs12119079	1.4e-18	-0.81	Brain - Putamen (basal ganglia)
ACP6	1	147129014	1:147129014	1_147129014_A_G_b37	rs12119079	8.2e-19	-0.54	Liver
ACP6	1	147129014	1:147129014	1_147129014_A_G_b37	rs12119079	2.2e-19	-0.85	Brain - Hippocampus
ACP6	1	147129014	1:147129014	1_147129014_A_G_b37	rs12119079	1.1e-19	-0.77	Brain - Caudate (basal ganglia)
ACP6	1	147129014	1:147129014	1_147129014_A_G_b37	rs12119079	1.1e-20	-0.87	Pituitary
ACP6	1	147129014	1:147129014	1_147129014_A_G_b37	rs12119079	1.1e-21	-0.78	Brain - Cortex
ACP6	1	147129014	1:147129014	1_147129014_A_G_b37	rs12119079	4.3e-22	-0.81	Brain - Frontal Cortex (BA9)
ACP6	1	147129014	1:147129014	1_147129014_A_G_b37	rs12119079	1.5e-22	-0.45	Lung
ACP6	1	147129014	1:147129014	1_147129014_A_G_b37	rs12119079	2.9e-23	-0.86	Brain - Nucleus accumbens (basal ganglia)
ACP6	1	147129014	1:147129014	1_147129014_A_G_b37	rs12119079	2.1e-23	-0.68	Colon - Sigmoid
ACP6	1	147129014	1:147129014	1_147129014_A_G_b37	rs12119079	9.3e-26	-0.77	Esophagus - Gastroesophageal Junction
ACP6	1	147129014	1:147129014	1_147129014_A_G_b37	rs12119079	6.9e-28	-0.47	Adipose - Visceral (Omentum)
ACP6	1	147129014	1:147129014	1_147129014_A_G_b37	rs12119079	1.5e-28	-0.55	Heart - Left Ventricle
ACP6	1	147129014	1:147129014	1_147129014_A_G_b37	rs12119079	9.4e-29	-0.66	Stomach
ACP6	1	147129014	1:147129014	1_147129014_A_G_b37	rs12119079	6.2e-31	-0.52	Cells - Transformed fibroblasts
ACP6	1	147129014	1:147129014	1_147129014_A_G_b37	rs12119079	2.3e-31	-0.52	Artery - Aorta
ACP6	1	147129014	1:147129014	1_147129014_A_G_b37	rs12119079	5e-32	-0.96	Adrenal Gland
ACP6	1	147129014	1:147129014	1_147129014_A_G_b37	rs12119079	3.8e-33	-0.8	Testis
ACP6	1	147129014	1:147129014	1_147129014_A_G_b37	rs12119079	3e-33	-0.5	Nerve - Tibial
ACP6	1	147129014	1:147129014	1_147129014_A_G_b37	rs12119079	2.7e-33	-0.89	Pancreas
ACP6	1	147129014	1:147129014	1_147129014_A_G_b37	rs12119079	9.2e-36	-0.56	Adipose - Subcutaneous
ACP6	1	147129014	1:147129014	1_147129014_A_G_b37	rs12119079	1.2e-36	-0.55	Skin - Not Sun Exposed (Suprapubic)
ACP6	1	147129014	1:147129014	1_147129014_A_G_b37	rs12119079	2.9e-40	-0.67	Heart - Atrial Appendage
ACP6	1	147129014	1:147129014	1_147129014_A_G_b37	rs12119079	9.7e-43	-0.77	Colon - Transverse
ACP6	1	147129014	1:147129014	1_147129014_A_G_b37	rs12119079	1.2e-45	-0.62	Esophagus - Mucosa
ACP6	1	147129014	1:147129014	1_147129014_A_G_b37	rs12119079	4.1e-46	-0.59	Skin - Sun Exposed (Lower leg)
ACP6	1	147129014	1:147129014	1_147129014_A_G_b37	rs12119079	3.1e-49	-0.68	Esophagus - Muscularis
ACP6	1	147129014	1:147129014	1_147129014_A_G_b37	rs12119079	5.9e-52	-0.59	Artery - Tibial
ACP6	1	147129014	1:147129014	1_147129014_A_G_b37	rs12119079	5.4e-77	-0.83	Thyroid
ACP6	1	147129014	1:147129014	1_147129014_A_G_b37	rs12119079	2.1e-82	-0.67	Muscle - Skeletal
ACP6	1	147129786	1:147129786	1_147129786_G_A_b37	rs12145385	4.6e-08	-0.47	Brain - Cerebellar Hemisphere
ACP6	1	147129786	1:147129786	1_147129786_G_A_b37	rs12145385	3.1e-08	-0.44	Vagina
ACP6	1	147129786	1:147129786	1_147129786_G_A_b37	rs12145385	2.6e-08	-0.22	Whole Blood
ACP6	1	147129786	1:147129786	1_147129786_G_A_b37	rs12145385	9e-09	-0.71	Cells - EBV-transformed lymphocytes
ACP6	1	147129786	1:147129786	1_147129786_G_A_b37	rs12145385	1.3e-09	-0.6	Minor Salivary Gland
ACP6	1	147129786	1:147129786	1_147129786_G_A_b37	rs12145385	7e-11	-0.55	Brain - Cerebellum
ACP6	1	147129786	1:147129786	1_147129786_G_A_b37	rs12145385	2.3e-11	-0.76	Brain - Spinal cord (cervical c-1)
ACP6	1	147129786	1:147129786	1_147129786_G_A_b37	rs12145385	8.5e-12	-0.55	Ovary
ACP6	1	147129786	1:147129786	1_147129786_G_A_b37	rs12145385	2.2e-12	-0.62	Brain - Anterior cingulate cortex (BA24)
ACP6	1	147129786	1:147129786	1_147129786_G_A_b37	rs12145385	5.1e-14	-0.54	Prostate
ACP6	1	147129786	1:147129786	1_147129786_G_A_b37	rs12145385	7.3e-15	-0.95	Brain - Substantia nigra
ACP6	1	147129786	1:147129786	1_147129786_G_A_b37	rs12145385	6.4e-16	-0.79	Spleen
ACP6	1	147129786	1:147129786	1_147129786_G_A_b37	rs12145385	4.9e-17	-0.77	Small Intestine - Terminal Ileum
ACP6	1	147129786	1:147129786	1_147129786_G_A_b37	rs12145385	1.9e-17	-0.36	Breast - Mammary Tissue
ACP6	1	147129786	1:147129786	1_147129786_G_A_b37	rs12145385	1.2e-17	-0.81	Brain - Amygdala
ACP6	1	147129786	1:147129786	1_147129786_G_A_b37	rs12145385	3.1e-18	-0.49	Artery - Coronary
ACP6	1	147129786	1:147129786	1_147129786_G_A_b37	rs12145385	1.5e-18	-0.86	Brain - Hypothalamus
ACP6	1	147129786	1:147129786	1_147129786_G_A_b37	rs12145385	1.4e-18	-0.81	Brain - Putamen (basal ganglia)
ACP6	1	147129786	1:147129786	1_147129786_G_A_b37	rs12145385	8.2e-19	-0.54	Liver
ACP6	1	147129786	1:147129786	1_147129786_G_A_b37	rs12145385	2.2e-19	-0.85	Brain - Hippocampus
ACP6	1	147129786	1:147129786	1_147129786_G_A_b37	rs12145385	1.1e-19	-0.77	Brain - Caudate (basal ganglia)
ACP6	1	147129786	1:147129786	1_147129786_G_A_b37	rs12145385	1.1e-20	-0.87	Pituitary
ACP6	1	147129786	1:147129786	1_147129786_G_A_b37	rs12145385	1.1e-21	-0.78	Brain - Cortex
ACP6	1	147129786	1:147129786	1_147129786_G_A_b37	rs12145385	4.3e-22	-0.81	Brain - Frontal Cortex (BA9)
ACP6	1	147129786	1:147129786	1_147129786_G_A_b37	rs12145385	1.5e-22	-0.45	Lung
ACP6	1	147129786	1:147129786	1_147129786_G_A_b37	rs12145385	2.9e-23	-0.86	Brain - Nucleus accumbens (basal ganglia)
ACP6	1	147129786	1:147129786	1_147129786_G_A_b37	rs12145385	2.1e-23	-0.68	Colon - Sigmoid
ACP6	1	147129786	1:147129786	1_147129786_G_A_b37	rs12145385	9.3e-26	-0.77	Esophagus - Gastroesophageal Junction
ACP6	1	147129786	1:147129786	1_147129786_G_A_b37	rs12145385	6.9e-28	-0.47	Adipose - Visceral (Omentum)
ACP6	1	147129786	1:147129786	1_147129786_G_A_b37	rs12145385	1.5e-28	-0.55	Heart - Left Ventricle
ACP6	1	147129786	1:147129786	1_147129786_G_A_b37	rs12145385	9.4e-29	-0.66	Stomach
ACP6	1	147129786	1:147129786	1_147129786_G_A_b37	rs12145385	6.2e-31	-0.52	Cells - Transformed fibroblasts
ACP6	1	147129786	1:147129786	1_147129786_G_A_b37	rs12145385	2.3e-31	-0.52	Artery - Aorta
ACP6	1	147129786	1:147129786	1_147129786_G_A_b37	rs12145385	5e-32	-0.96	Adrenal Gland
ACP6	1	147129786	1:147129786	1_147129786_G_A_b37	rs12145385	3.8e-33	-0.8	Testis
ACP6	1	147129786	1:147129786	1_147129786_G_A_b37	rs12145385	3e-33	-0.5	Nerve - Tibial
ACP6	1	147129786	1:147129786	1_147129786_G_A_b37	rs12145385	1.3e-33	-0.89	Pancreas
ACP6	1	147129786	1:147129786	1_147129786_G_A_b37	rs12145385	8.4e-36	-0.56	Adipose - Subcutaneous
ACP6	1	147129786	1:147129786	1_147129786_G_A_b37	rs12145385	1.2e-36	-0.55	Skin - Not Sun Exposed (Suprapubic)
ACP6	1	147129786	1:147129786	1_147129786_G_A_b37	rs12145385	2.3e-40	-0.67	Heart - Atrial Appendage
ACP6	1	147129786	1:147129786	1_147129786_G_A_b37	rs12145385	9.7e-43	-0.77	Colon - Transverse
ACP6	1	147129786	1:147129786	1_147129786_G_A_b37	rs12145385	1.2e-45	-0.62	Esophagus - Mucosa
ACP6	1	147129786	1:147129786	1_147129786_G_A_b37	rs12145385	1.8e-46	-0.59	Skin - Sun Exposed (Lower leg)
ACP6	1	147129786	1:147129786	1_147129786_G_A_b37	rs12145385	2.5e-49	-0.68	Esophagus - Muscularis
ACP6	1	147129786	1:147129786	1_147129786_G_A_b37	rs12145385	1.3e-51	-0.58	Artery - Tibial
ACP6	1	147129786	1:147129786	1_147129786_G_A_b37	rs12145385	5.4e-77	-0.83	Thyroid
ACP6	1	147129786	1:147129786	1_147129786_G_A_b37	rs12145385	2.1e-82	-0.67	Muscle - Skeletal
ACP6	1	147135406	1:147135406	1_147135406_GC_G_b37	rs140291349	4.6e-07	-0.2	Whole Blood
ACP6	1	147135406	1:147135406	1_147135406_GC_G_b37	rs140291349	7.8e-08	-0.44	Vagina
ACP6	1	147135406	1:147135406	1_147135406_GC_G_b37	rs140291349	4.7e-08	-0.48	Brain - Cerebellar Hemisphere
ACP6	1	147135406	1:147135406	1_147135406_GC_G_b37	rs140291349	1.7e-08	-0.7	Cells - EBV-transformed lymphocytes
ACP6	1	147135406	1:147135406	1_147135406_GC_G_b37	rs140291349	1.3e-09	-0.6	Minor Salivary Gland
ACP6	1	147135406	1:147135406	1_147135406_GC_G_b37	rs140291349	1.6e-10	-0.55	Brain - Cerebellum
ACP6	1	147135406	1:147135406	1_147135406_GC_G_b37	rs140291349	1.2e-10	-0.54	Ovary
ACP6	1	147135406	1:147135406	1_147135406_GC_G_b37	rs140291349	2.3e-11	-0.76	Brain - Spinal cord (cervical c-1)
ACP6	1	147135406	1:147135406	1_147135406_GC_G_b37	rs140291349	2e-11	-0.62	Brain - Anterior cingulate cortex (BA24)
ACP6	1	147135406	1:147135406	1_147135406_GC_G_b37	rs140291349	7.9e-13	-0.51	Prostate
ACP6	1	147135406	1:147135406	1_147135406_GC_G_b37	rs140291349	8.9e-14	-0.75	Spleen
ACP6	1	147135406	1:147135406	1_147135406_GC_G_b37	rs140291349	7.3e-15	-0.95	Brain - Substantia nigra
ACP6	1	147135406	1:147135406	1_147135406_GC_G_b37	rs140291349	1.1e-15	-0.35	Breast - Mammary Tissue
ACP6	1	147135406	1:147135406	1_147135406_GC_G_b37	rs140291349	6.4e-17	-0.77	Small Intestine - Terminal Ileum
ACP6	1	147135406	1:147135406	1_147135406_GC_G_b37	rs140291349	1.1e-17	-0.83	Brain - Amygdala
ACP6	1	147135406	1:147135406	1_147135406_GC_G_b37	rs140291349	3.4e-18	-0.54	Liver
ACP6	1	147135406	1:147135406	1_147135406_GC_G_b37	rs140291349	3.1e-18	-0.49	Artery - Coronary
ACP6	1	147135406	1:147135406	1_147135406_GC_G_b37	rs140291349	2.2e-18	-0.87	Brain - Hypothalamus
ACP6	1	147135406	1:147135406	1_147135406_GC_G_b37	rs140291349	1.4e-18	-0.81	Brain - Putamen (basal ganglia)
ACP6	1	147135406	1:147135406	1_147135406_GC_G_b37	rs140291349	6.1e-19	-0.85	Brain - Hippocampus
ACP6	1	147135406	1:147135406	1_147135406_GC_G_b37	rs140291349	1.1e-19	-0.77	Brain - Caudate (basal ganglia)
ACP6	1	147135406	1:147135406	1_147135406_GC_G_b37	rs140291349	2.8e-20	-0.78	Brain - Cortex
ACP6	1	147135406	1:147135406	1_147135406_GC_G_b37	rs140291349	1.1e-20	-0.87	Pituitary
ACP6	1	147135406	1:147135406	1_147135406_GC_G_b37	rs140291349	3.8e-21	-0.81	Brain - Frontal Cortex (BA9)
ACP6	1	147135406	1:147135406	1_147135406_GC_G_b37	rs140291349	6.7e-23	-0.45	Lung
ACP6	1	147135406	1:147135406	1_147135406_GC_G_b37	rs140291349	2.9e-23	-0.86	Brain - Nucleus accumbens (basal ganglia)
ACP6	1	147135406	1:147135406	1_147135406_GC_G_b37	rs140291349	2.1e-23	-0.68	Colon - Sigmoid
ACP6	1	147135406	1:147135406	1_147135406_GC_G_b37	rs140291349	4.4e-25	-0.77	Esophagus - Gastroesophageal Junction
ACP6	1	147135406	1:147135406	1_147135406_GC_G_b37	rs140291349	3e-27	-0.64	Stomach
ACP6	1	147135406	1:147135406	1_147135406_GC_G_b37	rs140291349	2.6e-27	-0.47	Adipose - Visceral (Omentum)
ACP6	1	147135406	1:147135406	1_147135406_GC_G_b37	rs140291349	8.2e-29	-0.92	Adrenal Gland
ACP6	1	147135406	1:147135406	1_147135406_GC_G_b37	rs140291349	2.2e-29	-0.56	Heart - Left Ventricle
ACP6	1	147135406	1:147135406	1_147135406_GC_G_b37	rs140291349	1.9e-29	-0.51	Cells - Transformed fibroblasts
ACP6	1	147135406	1:147135406	1_147135406_GC_G_b37	rs140291349	2.5e-30	-0.52	Artery - Aorta
ACP6	1	147135406	1:147135406	1_147135406_GC_G_b37	rs140291349	1e-30	-0.78	Testis
ACP6	1	147135406	1:147135406	1_147135406_GC_G_b37	rs140291349	6.5e-31	-0.86	Pancreas
ACP6	1	147135406	1:147135406	1_147135406_GC_G_b37	rs140291349	4.7e-31	-0.49	Nerve - Tibial
ACP6	1	147135406	1:147135406	1_147135406_GC_G_b37	rs140291349	1.4e-34	-0.54	Skin - Not Sun Exposed (Suprapubic)
ACP6	1	147135406	1:147135406	1_147135406_GC_G_b37	rs140291349	6.2e-36	-0.56	Adipose - Subcutaneous
ACP6	1	147135406	1:147135406	1_147135406_GC_G_b37	rs140291349	6.1e-40	-0.75	Colon - Transverse
ACP6	1	147135406	1:147135406	1_147135406_GC_G_b37	rs140291349	2.3e-40	-0.67	Heart - Atrial Appendage
ACP6	1	147135406	1:147135406	1_147135406_GC_G_b37	rs140291349	3.6e-43	-0.61	Esophagus - Mucosa
ACP6	1	147135406	1:147135406	1_147135406_GC_G_b37	rs140291349	1.1e-45	-0.59	Skin - Sun Exposed (Lower leg)
ACP6	1	147135406	1:147135406	1_147135406_GC_G_b37	rs140291349	1.6e-48	-0.67	Esophagus - Muscularis
ACP6	1	147135406	1:147135406	1_147135406_GC_G_b37	rs140291349	5.6e-49	-0.58	Artery - Tibial
ACP6	1	147135406	1:147135406	1_147135406_GC_G_b37	rs140291349	5.2e-75	-0.82	Thyroid
ACP6	1	147135406	1:147135406	1_147135406_GC_G_b37	rs140291349	7.4e-79	-0.66	Muscle - Skeletal
S100A10	1	151839838	1:151839838	1_151839838_A_C_b37	rs12566232	9.5e-05	-0.14	Nerve - Tibial
THEM4	1	151839838	1:151839838	1_151839838_A_C_b37	rs12566232	1.7e-07	-0.19	Muscle - Skeletal
S100A10	1	151839838	1:151839838	1_151839838_A_C_b37	rs12566232	1.4e-07	-0.42	Brain - Hypothalamus
THEM4	1	151839838	1:151839838	1_151839838_A_C_b37	rs12566232	3.4e-08	-0.29	Adipose - Visceral (Omentum)
THEM4	1	151839838	1:151839838	1_151839838_A_C_b37	rs12566232	3.1e-08	-0.39	Liver
S100A10	1	151839838	1:151839838	1_151839838_A_C_b37	rs12566232	9e-09	-0.4	Brain - Cerebellum
THEM4	1	151839838	1:151839838	1_151839838_A_C_b37	rs12566232	5.5e-09	-0.44	Pancreas
THEM4	1	151839838	1:151839838	1_151839838_A_C_b37	rs12566232	4.2e-09	-0.26	Esophagus - Mucosa
THEM4	1	151839838	1:151839838	1_151839838_A_C_b37	rs12566232	2e-10	-0.31	Skin - Sun Exposed (Lower leg)
THEM4	1	151839838	1:151839838	1_151839838_A_C_b37	rs12566232	1.2e-11	-0.36	Cells - Transformed fibroblasts
THEM4	1	151839838	1:151839838	1_151839838_A_C_b37	rs12566232	6.8e-12	-0.36	Adipose - Subcutaneous
THEM4	1	151839838	1:151839838	1_151839838_A_C_b37	rs12566232	6.2e-13	-0.41	Nerve - Tibial
NBPF18P	1	151839838	1:151839838	1_151839838_A_C_b37	rs12566232	3.6e-25	-0.48	Nerve - Tibial
THEM4	1	151845650	1:151845650	1_151845650_G_C_b37	rs2338201	5.4e-07	0.47	Brain - Anterior cingulate cortex (BA24)
THEM4	1	151845650	1:151845650	1_151845650_G_C_b37	rs2338201	4.2e-07	0.49	Minor Salivary Gland
THEM4	1	151845650	1:151845650	1_151845650_G_C_b37	rs2338201	3.4e-07	0.35	Adrenal Gland
THEM4	1	151845650	1:151845650	1_151845650_G_C_b37	rs2338201	3.4e-07	0.66	Brain - Spinal cord (cervical c-1)
KRT8P28	1	151845650	1:151845650	1_151845650_G_C_b37	rs2338201	2.2e-07	-0.42	Testis
THEM4	1	151845650	1:151845650	1_151845650_G_C_b37	rs2338201	1.7e-07	0.37	Pituitary
THEM4	1	151845650	1:151845650	1_151845650_G_C_b37	rs2338201	1.1e-07	0.47	Brain - Cortex
THEM4	1	151845650	1:151845650	1_151845650_G_C_b37	rs2338201	7.7e-08	0.37	Brain - Hypothalamus
THEM4	1	151845650	1:151845650	1_151845650_G_C_b37	rs2338201	1.6e-08	0.23	Heart - Left Ventricle
THEM4	1	151845650	1:151845650	1_151845650_G_C_b37	rs2338201	9.1e-10	0.42	Colon - Sigmoid
THEM4	1	151845650	1:151845650	1_151845650_G_C_b37	rs2338201	8e-10	0.29	Colon - Transverse
THEM4	1	151845650	1:151845650	1_151845650_G_C_b37	rs2338201	5.5e-10	0.2	Whole Blood
THEM4	1	151845650	1:151845650	1_151845650_G_C_b37	rs2338201	3.5e-10	0.39	Artery - Coronary
THEM4	1	151845650	1:151845650	1_151845650_G_C_b37	rs2338201	1.9e-10	0.28	Skin - Not Sun Exposed (Suprapubic)
THEM4	1	151845650	1:151845650	1_151845650_G_C_b37	rs2338201	1.5e-10	0.2	Lung
THEM4	1	151845650	1:151845650	1_151845650_G_C_b37	rs2338201	9.8e-11	0.32	Stomach
THEM4	1	151845650	1:151845650	1_151845650_G_C_b37	rs2338201	1.6e-11	0.34	Breast - Mammary Tissue
THEM4	1	151845650	1:151845650	1_151845650_G_C_b37	rs2338201	6.6e-12	0.48	Brain - Cerebellum
THEM4	1	151845650	1:151845650	1_151845650_G_C_b37	rs2338201	2.3e-14	0.47	Pancreas
S100A10	1	151845650	1:151845650	1_151845650_G_C_b37	rs2338201	8.6e-15	-0.55	Spleen
NBPF18P	1	151845650	1:151845650	1_151845650_G_C_b37	rs2338201	4e-15	0.33	Nerve - Tibial
THEM4	1	151845650	1:151845650	1_151845650_G_C_b37	rs2338201	2.5e-15	0.35	Artery - Aorta
THEM4	1	151845650	1:151845650	1_151845650_G_C_b37	rs2338201	2.1e-15	0.33	Skin - Sun Exposed (Lower leg)
THEM4	1	151845650	1:151845650	1_151845650_G_C_b37	rs2338201	1.4e-18	0.34	Esophagus - Mucosa
THEM4	1	151845650	1:151845650	1_151845650_G_C_b37	rs2338201	5.8e-19	0.36	Esophagus - Muscularis
THEM4	1	151845650	1:151845650	1_151845650_G_C_b37	rs2338201	1.4e-19	0.29	Muscle - Skeletal
THEM4	1	151845650	1:151845650	1_151845650_G_C_b37	rs2338201	5.8e-20	0.42	Adipose - Visceral (Omentum)
THEM4	1	151845650	1:151845650	1_151845650_G_C_b37	rs2338201	9.8e-22	0.45	Cells - Transformed fibroblasts
THEM4	1	151845650	1:151845650	1_151845650_G_C_b37	rs2338201	1.1e-25	0.43	Artery - Tibial
THEM4	1	151845650	1:151845650	1_151845650_G_C_b37	rs2338201	4.8e-26	0.47	Adipose - Subcutaneous
THEM4	1	151845650	1:151845650	1_151845650_G_C_b37	rs2338201	1.2e-32	0.55	Nerve - Tibial
THEM4	1	151868892	1:151868892	1_151868892_C_T_b37	rs7542137	7.6e-07	0.33	Adrenal Gland
THEM4	1	151868892	1:151868892	1_151868892_C_T_b37	rs7542137	2.9e-07	0.64	Brain - Spinal cord (cervical c-1)
THEM4	1	151868892	1:151868892	1_151868892_C_T_b37	rs7542137	1.5e-07	0.49	Brain - Anterior cingulate cortex (BA24)
THEM4	1	151868892	1:151868892	1_151868892_C_T_b37	rs7542137	1.3e-07	0.37	Pituitary
KRT8P28	1	151868892	1:151868892	1_151868892_C_T_b37	rs7542137	8.4e-08	-0.44	Testis
THEM4	1	151868892	1:151868892	1_151868892_C_T_b37	rs7542137	4.3e-08	0.27	Breast - Mammary Tissue
THEM4	1	151868892	1:151868892	1_151868892_C_T_b37	rs7542137	3e-08	0.22	Heart - Left Ventricle
THEM4	1	151868892	1:151868892	1_151868892_C_T_b37	rs7542137	2.6e-08	0.38	Brain - Hypothalamus
THEM4	1	151868892	1:151868892	1_151868892_C_T_b37	rs7542137	8.6e-09	0.39	Colon - Sigmoid
THEM4	1	151868892	1:151868892	1_151868892_C_T_b37	rs7542137	3e-09	0.27	Colon - Transverse
THEM4	1	151868892	1:151868892	1_151868892_C_T_b37	rs7542137	8.1e-10	0.27	Skin - Not Sun Exposed (Suprapubic)
THEM4	1	151868892	1:151868892	1_151868892_C_T_b37	rs7542137	4e-10	0.38	Artery - Coronary
THEM4	1	151868892	1:151868892	1_151868892_C_T_b37	rs7542137	3.6e-10	0.45	Brain - Cerebellum
THEM4	1	151868892	1:151868892	1_151868892_C_T_b37	rs7542137	8.7e-11	0.31	Stomach
THEM4	1	151868892	1:151868892	1_151868892_C_T_b37	rs7542137	5.3e-11	0.2	Lung
THEM4	1	151868892	1:151868892	1_151868892_C_T_b37	rs7542137	3.8e-11	0.21	Whole Blood
THEM4	1	151868892	1:151868892	1_151868892_C_T_b37	rs7542137	1.8e-12	0.42	Pancreas
S100A10	1	151868892	1:151868892	1_151868892_C_T_b37	rs7542137	9.7e-15	-0.54	Spleen
THEM4	1	151868892	1:151868892	1_151868892_C_T_b37	rs7542137	6.4e-15	0.32	Skin - Sun Exposed (Lower leg)
THEM4	1	151868892	1:151868892	1_151868892_C_T_b37	rs7542137	5.3e-16	0.35	Artery - Aorta
NBPF18P	1	151868892	1:151868892	1_151868892_C_T_b37	rs7542137	1.6e-16	0.34	Nerve - Tibial
THEM4	1	151868892	1:151868892	1_151868892_C_T_b37	rs7542137	8.3e-18	0.27	Muscle - Skeletal
THEM4	1	151868892	1:151868892	1_151868892_C_T_b37	rs7542137	2.4e-18	0.33	Esophagus - Mucosa
THEM4	1	151868892	1:151868892	1_151868892_C_T_b37	rs7542137	8.9e-19	0.42	Cells - Transformed fibroblasts
THEM4	1	151868892	1:151868892	1_151868892_C_T_b37	rs7542137	8.6e-19	0.4	Adipose - Visceral (Omentum)
THEM4	1	151868892	1:151868892	1_151868892_C_T_b37	rs7542137	6.1e-19	0.35	Esophagus - Muscularis
THEM4	1	151868892	1:151868892	1_151868892_C_T_b37	rs7542137	4.5e-23	0.44	Adipose - Subcutaneous
THEM4	1	151868892	1:151868892	1_151868892_C_T_b37	rs7542137	5.9e-24	0.41	Artery - Tibial
THEM4	1	151868892	1:151868892	1_151868892_C_T_b37	rs7542137	2e-31	0.53	Nerve - Tibial
S100A10	1	151879761	1:151879761	1_151879761_G_A_b37	rs28415528	9.7e-07	-0.33	Brain - Nucleus accumbens (basal ganglia)
S100A10	1	151879761	1:151879761	1_151879761_G_A_b37	rs28415528	8.5e-07	0.34	Liver
THEM4	1	151879761	1:151879761	1_151879761_G_A_b37	rs28415528	6e-07	-0.22	Esophagus - Muscularis
THEM4	1	151879761	1:151879761	1_151879761_G_A_b37	rs28415528	4.9e-07	-0.17	Muscle - Skeletal
THEM4	1	151879761	1:151879761	1_151879761_G_A_b37	rs28415528	1.7e-07	-0.26	Adipose - Visceral (Omentum)
THEM4	1	151879761	1:151879761	1_151879761_G_A_b37	rs28415528	7.8e-08	-0.25	Skin - Not Sun Exposed (Suprapubic)
THEM4	1	151879761	1:151879761	1_151879761_G_A_b37	rs28415528	7.1e-10	-0.26	Esophagus - Mucosa
THEM4	1	151879761	1:151879761	1_151879761_G_A_b37	rs28415528	1.8e-10	-0.43	Liver
THEM4	1	151879761	1:151879761	1_151879761_G_A_b37	rs28415528	5.5e-11	-0.3	Skin - Sun Exposed (Lower leg)
THEM4	1	151879761	1:151879761	1_151879761_G_A_b37	rs28415528	1.9e-11	-0.32	Adipose - Subcutaneous
THEM4	1	151879761	1:151879761	1_151879761_G_A_b37	rs28415528	5.3e-12	-0.47	Pancreas
THEM4	1	151879761	1:151879761	1_151879761_G_A_b37	rs28415528	2.6e-14	-0.37	Cells - Transformed fibroblasts
THEM4	1	151879761	1:151879761	1_151879761_G_A_b37	rs28415528	1.9e-14	-0.4	Nerve - Tibial
NBPF18P	1	151879761	1:151879761	1_151879761_G_A_b37	rs28415528	3.4e-21	-0.41	Nerve - Tibial
S100A10	1	151920040	1:151920040	1_151920040_G_T_b37	rs7538652	8.6e-05	-0.12	Esophagus - Muscularis
THEM4	1	151920040	1:151920040	1_151920040_G_T_b37	rs7538652	8.2e-07	-0.27	Breast - Mammary Tissue
THEM4	1	151920040	1:151920040	1_151920040_G_T_b37	rs7538652	3.3e-07	-0.23	Esophagus - Muscularis
THEM4	1	151920040	1:151920040	1_151920040_G_T_b37	rs7538652	2.6e-07	-0.37	Colon - Sigmoid
S100A10	1	151920040	1:151920040	1_151920040_G_T_b37	rs7538652	9e-08	0.37	Liver
THEM4	1	151920040	1:151920040	1_151920040_G_T_b37	rs7538652	6.1e-08	-0.27	Adipose - Visceral (Omentum)
THEM4	1	151920040	1:151920040	1_151920040_G_T_b37	rs7538652	1.6e-08	-0.26	Skin - Not Sun Exposed (Suprapubic)
THEM4	1	151920040	1:151920040	1_151920040_G_T_b37	rs7538652	6.4e-09	-0.27	Artery - Tibial
THEM4	1	151920040	1:151920040	1_151920040_G_T_b37	rs7538652	2.4e-09	-0.2	Muscle - Skeletal
THEM4	1	151920040	1:151920040	1_151920040_G_T_b37	rs7538652	9.1e-11	-0.27	Esophagus - Mucosa
THEM4	1	151920040	1:151920040	1_151920040_G_T_b37	rs7538652	6.9e-11	-0.44	Liver
THEM4	1	151920040	1:151920040	1_151920040_G_T_b37	rs7538652	3.3e-12	-0.31	Skin - Sun Exposed (Lower leg)
THEM4	1	151920040	1:151920040	1_151920040_G_T_b37	rs7538652	6.3e-13	-0.49	Pancreas
THEM4	1	151920040	1:151920040	1_151920040_G_T_b37	rs7538652	5.4e-13	-0.35	Adipose - Subcutaneous
THEM4	1	151920040	1:151920040	1_151920040_G_T_b37	rs7538652	7.2e-16	-0.42	Nerve - Tibial
THEM4	1	151920040	1:151920040	1_151920040_G_T_b37	rs7538652	7.3e-18	-0.43	Cells - Transformed fibroblasts
NBPF18P	1	151920040	1:151920040	1_151920040_G_T_b37	rs7538652	2e-23	-0.42	Nerve - Tibial
S100A10	1	151921690	1:151921690	1_151921690_C_CTTCT_b37	rs57649312	8.7e-05	-0.12	Esophagus - Muscularis
LINGO4	1	151921690	1:151921690	1_151921690_C_CTTCT_b37	rs57649312	6.4e-05	-0.23	Skin - Sun Exposed (Lower leg)
THEM4	1	151921690	1:151921690	1_151921690_C_CTTCT_b37	rs57649312	9e-07	-0.22	Esophagus - Muscularis
THEM4	1	151921690	1:151921690	1_151921690_C_CTTCT_b37	rs57649312	6.5e-07	-0.28	Breast - Mammary Tissue
THEM4	1	151921690	1:151921690	1_151921690_C_CTTCT_b37	rs57649312	3.1e-07	-0.38	Colon - Sigmoid
THEM4	1	151921690	1:151921690	1_151921690_C_CTTCT_b37	rs57649312	1.3e-07	-0.25	Skin - Not Sun Exposed (Suprapubic)
THEM4	1	151921690	1:151921690	1_151921690_C_CTTCT_b37	rs57649312	6.4e-08	-0.27	Adipose - Visceral (Omentum)
S100A10	1	151921690	1:151921690	1_151921690_C_CTTCT_b37	rs57649312	4.8e-08	0.38	Liver
THEM4	1	151921690	1:151921690	1_151921690_C_CTTCT_b37	rs57649312	5.8e-09	-0.2	Muscle - Skeletal
THEM4	1	151921690	1:151921690	1_151921690_C_CTTCT_b37	rs57649312	2.9e-09	-0.28	Artery - Tibial
THEM4	1	151921690	1:151921690	1_151921690_C_CTTCT_b37	rs57649312	4.7e-10	-0.26	Esophagus - Mucosa
THEM4	1	151921690	1:151921690	1_151921690_C_CTTCT_b37	rs57649312	5.8e-11	-0.45	Pancreas
THEM4	1	151921690	1:151921690	1_151921690_C_CTTCT_b37	rs57649312	3.8e-11	-0.45	Liver
THEM4	1	151921690	1:151921690	1_151921690_C_CTTCT_b37	rs57649312	3.2e-12	-0.31	Skin - Sun Exposed (Lower leg)
THEM4	1	151921690	1:151921690	1_151921690_C_CTTCT_b37	rs57649312	1e-12	-0.34	Adipose - Subcutaneous
THEM4	1	151921690	1:151921690	1_151921690_C_CTTCT_b37	rs57649312	9.9e-16	-0.42	Nerve - Tibial
THEM4	1	151921690	1:151921690	1_151921690_C_CTTCT_b37	rs57649312	1.5e-16	-0.42	Cells - Transformed fibroblasts
NBPF18P	1	151921690	1:151921690	1_151921690_C_CTTCT_b37	rs57649312	1.2e-23	-0.43	Nerve - Tibial
S100A10	1	151930673	1:151930673	1_151930673_T_G_b37	rs6693396	8.7e-05	-0.12	Esophagus - Muscularis
S100A10	1	151930673	1:151930673	1_151930673_T_G_b37	rs6693396	9e-07	-0.34	Brain - Cerebellum
THEM4	1	151930673	1:151930673	1_151930673_T_G_b37	rs6693396	9e-07	-0.22	Esophagus - Muscularis
THEM4	1	151930673	1:151930673	1_151930673_T_G_b37	rs6693396	6.5e-07	-0.28	Breast - Mammary Tissue
THEM4	1	151930673	1:151930673	1_151930673_T_G_b37	rs6693396	4.8e-07	-0.37	Colon - Sigmoid
THEM4	1	151930673	1:151930673	1_151930673_T_G_b37	rs6693396	1.3e-07	-0.25	Skin - Not Sun Exposed (Suprapubic)
S100A10	1	151930673	1:151930673	1_151930673_T_G_b37	rs6693396	7.7e-08	0.37	Liver
THEM4	1	151930673	1:151930673	1_151930673_T_G_b37	rs6693396	6.4e-08	-0.27	Adipose - Visceral (Omentum)
THEM4	1	151930673	1:151930673	1_151930673_T_G_b37	rs6693396	6.3e-09	-0.2	Muscle - Skeletal
THEM4	1	151930673	1:151930673	1_151930673_T_G_b37	rs6693396	3.6e-09	-0.28	Artery - Tibial
THEM4	1	151930673	1:151930673	1_151930673_T_G_b37	rs6693396	2.4e-10	-0.26	Esophagus - Mucosa
THEM4	1	151930673	1:151930673	1_151930673_T_G_b37	rs6693396	5.3e-11	-0.45	Liver
THEM4	1	151930673	1:151930673	1_151930673_T_G_b37	rs6693396	1.7e-11	-0.46	Pancreas
THEM4	1	151930673	1:151930673	1_151930673_T_G_b37	rs6693396	1.3e-12	-0.34	Adipose - Subcutaneous
THEM4	1	151930673	1:151930673	1_151930673_T_G_b37	rs6693396	6.1e-13	-0.32	Skin - Sun Exposed (Lower leg)
THEM4	1	151930673	1:151930673	1_151930673_T_G_b37	rs6693396	2.2e-15	-0.42	Nerve - Tibial
THEM4	1	151930673	1:151930673	1_151930673_T_G_b37	rs6693396	8.2e-17	-0.42	Cells - Transformed fibroblasts
NBPF18P	1	151930673	1:151930673	1_151930673_T_G_b37	rs6693396	2e-24	-0.44	Nerve - Tibial
FMO3	1	171101497	1:171101497	1_171101497_C_A_b37	rs11811455	5.3e-07	0.28	Adipose - Subcutaneous	Trimethylaminuria, 602079 (3), Autosomal recessive
FMO3	1	171101497	1:171101497	1_171101497_C_A_b37	rs11811455	4e-07	0.26	Skin - Sun Exposed (Lower leg)	Trimethylaminuria, 602079 (3), Autosomal recessive
FMO3	1	171101497	1:171101497	1_171101497_C_A_b37	rs11811455	2.7e-07	0.34	Artery - Aorta	Trimethylaminuria, 602079 (3), Autosomal recessive
FMO3	1	171101497	1:171101497	1_171101497_C_A_b37	rs11811455	1.1e-07	0.38	Esophagus - Mucosa	Trimethylaminuria, 602079 (3), Autosomal recessive
FMO3	1	171101497	1:171101497	1_171101497_C_A_b37	rs11811455	1e-07	0.48	Pituitary	Trimethylaminuria, 602079 (3), Autosomal recessive
FMO3	1	171101497	1:171101497	1_171101497_C_A_b37	rs11811455	1.5e-08	0.31	Muscle - Skeletal	Trimethylaminuria, 602079 (3), Autosomal recessive
FMO2	1	171101497	1:171101497	1_171101497_C_A_b37	rs11811455	3.8e-11	0.37	Thyroid
FMO3	1	171101497	1:171101497	1_171101497_C_A_b37	rs11811455	1.7e-15	0.49	Adipose - Visceral (Omentum)	Trimethylaminuria, 602079 (3), Autosomal recessive
FMO3	1	171101497	1:171101497	1_171101497_C_A_b37	rs11811455	1.2e-15	0.5	Thyroid	Trimethylaminuria, 602079 (3), Autosomal recessive
PRRC2C	1	171347236	1:171347236	1_171347236_A_G_b37	rs147349410	5.2e-07	0.13	Artery - Tibial
FMO4	1	171347236	1:171347236	1_171347236_A_G_b37	rs147349410	3.5e-07	0.18	Skin - Sun Exposed (Lower leg)
PRRC2C	1	171347236	1:171347236	1_171347236_A_G_b37	rs147349410	2.7e-07	0.21	Artery - Aorta
FMO4	1	171347236	1:171347236	1_171347236_A_G_b37	rs147349410	4.5e-08	0.47	Prostate
FMO1	1	171347236	1:171347236	1_171347236_A_G_b37	rs147349410	4.7e-09	0.51	Liver
FMO4	1	171347236	1:171347236	1_171347236_A_G_b37	rs147349410	1.5e-09	0.18	Lung
FMO4	1	171347236	1:171347236	1_171347236_A_G_b37	rs147349410	2.1e-11	0.26	Skin - Not Sun Exposed (Suprapubic)
FMO4	1	171347236	1:171347236	1_171347236_A_G_b37	rs147349410	3.8e-15	0.37	Breast - Mammary Tissue
FMO4	1	171347236	1:171347236	1_171347236_A_G_b37	rs147349410	2.7e-15	0.49	Pancreas
FMO4	1	171347236	1:171347236	1_171347236_A_G_b37	rs147349410	9e-19	0.47	Liver
FMO4	1	171347236	1:171347236	1_171347236_A_G_b37	rs147349410	1.1e-20	0.42	Artery - Aorta
FMO4	1	171347236	1:171347236	1_171347236_A_G_b37	rs147349410	5.3e-32	0.47	Artery - Tibial
LYPLAL1	1	219360899	1:219360899	1_219360899_T_A_b37	rs6701914	2.1e-09	0.36	Esophagus - Mucosa
RP11-135J2.4	1	219360899	1:219360899	1_219360899_T_A_b37	rs6701914	7.5e-11	-0.52	Esophagus - Muscularis
LYPLAL1	1	219360899	1:219360899	1_219360899_T_A_b37	rs6701914	4.1e-13	0.39	Cells - Transformed fibroblasts
OR2W3	1	248039451	1:248039451	1_248039451_C_T_b37	rs3811444	6.1e-07	0.16	Whole Blood
TRIM54	2	27471025	2:27471025	2_27471025_C_T_b37	rs1561535	9.1e-05	-0.26	Nerve - Tibial
SLC5A6	2	27471025	2:27471025	2_27471025_C_T_b37	rs1561535	7.3e-07	-0.16	Nerve - Tibial
ATRAID	2	27471025	2:27471025	2_27471025_C_T_b37	rs1561535	7e-07	0.31	Small Intestine - Terminal Ileum
ATRAID	2	27471025	2:27471025	2_27471025_C_T_b37	rs1561535	2.5e-07	0.23	Pancreas
ATRAID	2	27471025	2:27471025	2_27471025_C_T_b37	rs1561535	6.3e-08	0.31	Brain - Cerebellum
ATRAID	2	27471025	2:27471025	2_27471025_C_T_b37	rs1561535	5.3e-08	0.17	Breast - Mammary Tissue
ATRAID	2	27471025	2:27471025	2_27471025_C_T_b37	rs1561535	2.4e-08	0.27	Stomach
ATRAID	2	27471025	2:27471025	2_27471025_C_T_b37	rs1561535	1.9e-08	0.14	Whole Blood
NRBP1	2	27471025	2:27471025	2_27471025_C_T_b37	rs1561535	1.5e-08	-0.17	Skin - Sun Exposed (Lower leg)
CAD	2	27471025	2:27471025	2_27471025_C_T_b37	rs1561535	6.9e-09	0.27	Pancreas	Epileptic encephalopathy, early infantile, 50, 616457 (3), Autosomal recessive
ATRAID	2	27471025	2:27471025	2_27471025_C_T_b37	rs1561535	3.4e-09	0.31	Esophagus - Gastroesophageal Junction
ATRAID	2	27471025	2:27471025	2_27471025_C_T_b37	rs1561535	3.1e-09	0.29	Adrenal Gland
ATRAID	2	27471025	2:27471025	2_27471025_C_T_b37	rs1561535	2.4e-09	0.52	Cells - EBV-transformed lymphocytes
ATRAID	2	27471025	2:27471025	2_27471025_C_T_b37	rs1561535	5.9e-10	0.21	Skin - Not Sun Exposed (Suprapubic)
ATRAID	2	27471025	2:27471025	2_27471025_C_T_b37	rs1561535	2.2e-10	0.24	Heart - Left Ventricle
ATRAID	2	27471025	2:27471025	2_27471025_C_T_b37	rs1561535	1.3e-11	0.26	Adipose - Visceral (Omentum)
ATRAID	2	27471025	2:27471025	2_27471025_C_T_b37	rs1561535	1e-11	0.21	Skin - Sun Exposed (Lower leg)
ATRAID	2	27471025	2:27471025	2_27471025_C_T_b37	rs1561535	6.3e-12	0.23	Adipose - Subcutaneous
SNX17	2	27471025	2:27471025	2_27471025_C_T_b37	rs1561535	2.9e-12	-0.25	Muscle - Skeletal
ATRAID	2	27471025	2:27471025	2_27471025_C_T_b37	rs1561535	2.7e-12	0.33	Colon - Transverse
ATRAID	2	27471025	2:27471025	2_27471025_C_T_b37	rs1561535	1.3e-13	0.31	Artery - Aorta
ATRAID	2	27471025	2:27471025	2_27471025_C_T_b37	rs1561535	1.2e-13	0.18	Thyroid
ATRAID	2	27471025	2:27471025	2_27471025_C_T_b37	rs1561535	2.6e-14	0.22	Artery - Tibial
ATRAID	2	27471025	2:27471025	2_27471025_C_T_b37	rs1561535	1.6e-14	0.24	Nerve - Tibial
ATRAID	2	27471025	2:27471025	2_27471025_C_T_b37	rs1561535	5.9e-15	0.3	Esophagus - Mucosa
ATRAID	2	27471025	2:27471025	2_27471025_C_T_b37	rs1561535	1.9e-16	0.31	Cells - Transformed fibroblasts
ATRAID	2	27471025	2:27471025	2_27471025_C_T_b37	rs1561535	4.4e-18	0.3	Esophagus - Muscularis
ATRAID	2	27471025	2:27471025	2_27471025_C_T_b37	rs1561535	5e-19	0.24	Lung
KRTCAP3	2	27598097	2:27598097	2_27598097_T_C_b37	rs4665972	6.7e-05	0.21	Muscle - Skeletal
AC074117.10	2	27598097	2:27598097	2_27598097_T_C_b37	rs4665972	8e-07	0.52	Brain - Cerebellum
NRBP1	2	27598097	2:27598097	2_27598097_T_C_b37	rs4665972	4.7e-07	-0.14	Cells - Transformed fibroblasts
KRTCAP3	2	27598097	2:27598097	2_27598097_T_C_b37	rs4665972	4.1e-07	0.5	Adrenal Gland
NRBP1	2	27598097	2:27598097	2_27598097_T_C_b37	rs4665972	3.1e-07	-0.15	Artery - Tibial
GCKR	2	27598097	2:27598097	2_27598097_T_C_b37	rs4665972	1.1e-07	0.26	Thyroid	Fasting plasma glucose level QTL 5, 613463 (3)
AC074117.10	2	27598097	2:27598097	2_27598097_T_C_b37	rs4665972	4.5e-08	-0.26	Cells - Transformed fibroblasts
NRBP1	2	27598097	2:27598097	2_27598097_T_C_b37	rs4665972	1.4e-08	-0.21	Adipose - Subcutaneous
NRBP1	2	27598097	2:27598097	2_27598097_T_C_b37	rs4665972	6e-10	-0.19	Skin - Not Sun Exposed (Suprapubic)
NRBP1	2	27598097	2:27598097	2_27598097_T_C_b37	rs4665972	7.8e-11	-0.18	Skin - Sun Exposed (Lower leg)
FNDC4	2	27598097	2:27598097	2_27598097_T_C_b37	rs4665972	1.1e-11	0.27	Thyroid
SNX17	2	27598097	2:27598097	2_27598097_T_C_b37	rs4665972	6.6e-22	-0.33	Muscle - Skeletal
ATRAID	2	27730940	2:27730940	2_27730940_T_C_b37	rs1260326	9.5e-05	0.15	Cells - Transformed fibroblasts
KRTCAP3	2	27730940	2:27730940	2_27730940_T_C_b37	rs1260326	8e-05	0.2	Muscle - Skeletal
NRBP1	2	27730940	2:27730940	2_27730940_T_C_b37	rs1260326	6.9e-05	-0.11	Cells - Transformed fibroblasts
GCKR	2	27730940	2:27730940	2_27730940_T_C_b37	rs1260326	9.2e-07	0.24	Thyroid	Fasting plasma glucose level QTL 5, 613463 (3)
KRTCAP3	2	27730940	2:27730940	2_27730940_T_C_b37	rs1260326	3.4e-07	0.5	Adrenal Gland
AC074117.10	2	27730940	2:27730940	2_27730940_T_C_b37	rs1260326	1e-07	-0.24	Cells - Transformed fibroblasts
AC074117.10	2	27730940	2:27730940	2_27730940_T_C_b37	rs1260326	5.7e-08	0.55	Brain - Cerebellum
NRBP1	2	27730940	2:27730940	2_27730940_T_C_b37	rs1260326	1.5e-08	-0.2	Adipose - Subcutaneous
NRBP1	2	27730940	2:27730940	2_27730940_T_C_b37	rs1260326	1.3e-08	-0.17	Skin - Not Sun Exposed (Suprapubic)
NRBP1	2	27730940	2:27730940	2_27730940_T_C_b37	rs1260326	3.5e-10	-0.17	Skin - Sun Exposed (Lower leg)
FNDC4	2	27730940	2:27730940	2_27730940_T_C_b37	rs1260326	1e-12	0.29	Thyroid
SNX17	2	27730940	2:27730940	2_27730940_T_C_b37	rs1260326	3.7e-19	-0.3	Muscle - Skeletal
SLC1A4	2	65225088	2:65225088	2_65225088_G_GC_b37	rs72538440	7.5e-41	-0.44	Muscle - Skeletal	Spastic tetraplegia, thin corpus callosum, and progressive microcephaly, 616657 (3), Autosomal recessive
NAT8	2	73713072	2:73713072	2_73713072_G_A_b37	rs13392872	9.8e-07	0.69	Brain - Cortex
ALMS1	2	73713072	2:73713072	2_73713072_G_A_b37	rs13392872	3e-07	0.18	Muscle - Skeletal	Alstrom syndrome, 203800 (3), Autosomal recessive
NAT8	2	73713072	2:73713072	2_73713072_G_A_b37	rs13392872	2.1e-07	0.44	Skin - Not Sun Exposed (Suprapubic)
NAT8	2	73713072	2:73713072	2_73713072_G_A_b37	rs13392872	1.4e-07	0.42	Esophagus - Muscularis
TPRKB	2	73713072	2:73713072	2_73713072_G_A_b37	rs13392872	1.3e-07	-0.27	Testis	Galloway-Mowat syndrome 5, 617731 (3), Autosomal recessive
ALMS1P	2	73713072	2:73713072	2_73713072_G_A_b37	rs13392872	1.1e-07	0.54	Heart - Left Ventricle
ALMS1P	2	73713072	2:73713072	2_73713072_G_A_b37	rs13392872	9.6e-08	0.57	Vagina
ALMS1P	2	73713072	2:73713072	2_73713072_G_A_b37	rs13392872	8.4e-08	0.31	Breast - Mammary Tissue
ALMS1P	2	73713072	2:73713072	2_73713072_G_A_b37	rs13392872	6.6e-08	0.4	Whole Blood
ALMS1	2	73713072	2:73713072	2_73713072_G_A_b37	rs13392872	5.9e-08	0.23	Skin - Not Sun Exposed (Suprapubic)	Alstrom syndrome, 203800 (3), Autosomal recessive
NAT8	2	73713072	2:73713072	2_73713072_G_A_b37	rs13392872	4.9e-08	0.76	Brain - Cerebellum
NAT8	2	73713072	2:73713072	2_73713072_G_A_b37	rs13392872	3.7e-08	0.56	Heart - Atrial Appendage
NAT8	2	73713072	2:73713072	2_73713072_G_A_b37	rs13392872	2.5e-08	0.67	Prostate
NAT8	2	73713072	2:73713072	2_73713072_G_A_b37	rs13392872	2e-08	0.47	Nerve - Tibial
ALMS1P	2	73713072	2:73713072	2_73713072_G_A_b37	rs13392872	1.2e-08	0.57	Artery - Coronary
ALMS1P	2	73713072	2:73713072	2_73713072_G_A_b37	rs13392872	6.6e-09	0.62	Adrenal Gland
ALMS1P	2	73713072	2:73713072	2_73713072_G_A_b37	rs13392872	4.7e-09	0.49	Artery - Aorta
ALMS1P	2	73713072	2:73713072	2_73713072_G_A_b37	rs13392872	3.7e-09	0.32	Lung
ALMS1P	2	73713072	2:73713072	2_73713072_G_A_b37	rs13392872	3e-09	0.78	Brain - Cortex
TPRKB	2	73713072	2:73713072	2_73713072_G_A_b37	rs13392872	2.7e-09	-0.22	Artery - Tibial	Galloway-Mowat syndrome 5, 617731 (3), Autosomal recessive
ALMS1P	2	73713072	2:73713072	2_73713072_G_A_b37	rs13392872	2.3e-09	0.48	Adipose - Visceral (Omentum)
ALMS1P	2	73713072	2:73713072	2_73713072_G_A_b37	rs13392872	5.1e-10	0.74	Small Intestine - Terminal Ileum
ALMS1P	2	73713072	2:73713072	2_73713072_G_A_b37	rs13392872	1.2e-10	0.6	Colon - Transverse
ALMS1	2	73713072	2:73713072	2_73713072_G_A_b37	rs13392872	6.8e-11	0.2	Whole Blood	Alstrom syndrome, 203800 (3), Autosomal recessive
ALMS1P	2	73713072	2:73713072	2_73713072_G_A_b37	rs13392872	2.1e-11	0.64	Colon - Sigmoid
NAT8	2	73713072	2:73713072	2_73713072_G_A_b37	rs13392872	2e-11	0.5	Artery - Tibial
ALMS1P	2	73713072	2:73713072	2_73713072_G_A_b37	rs13392872	1.5e-11	0.81	Brain - Cerebellar Hemisphere
NAT8	2	73713072	2:73713072	2_73713072_G_A_b37	rs13392872	1.4e-11	0.68	Pancreas
ALMS1P	2	73713072	2:73713072	2_73713072_G_A_b37	rs13392872	3.5e-12	0.65	Cells - Transformed fibroblasts
ALMS1P	2	73713072	2:73713072	2_73713072_G_A_b37	rs13392872	2.6e-12	0.62	Heart - Atrial Appendage
NAT8	2	73713072	2:73713072	2_73713072_G_A_b37	rs13392872	1.9e-12	0.78	Esophagus - Gastroesophageal Junction
NAT8	2	73713072	2:73713072	2_73713072_G_A_b37	rs13392872	1.3e-13	0.57	Skin - Sun Exposed (Lower leg)
ALMS1P	2	73713072	2:73713072	2_73713072_G_A_b37	rs13392872	4.7e-14	0.73	Esophagus - Gastroesophageal Junction
ALMS1P	2	73713072	2:73713072	2_73713072_G_A_b37	rs13392872	4.4e-14	0.62	Esophagus - Mucosa
ALMS1P	2	73713072	2:73713072	2_73713072_G_A_b37	rs13392872	2.7e-14	0.75	Stomach
ALMS1P	2	73713072	2:73713072	2_73713072_G_A_b37	rs13392872	2.6e-15	0.72	Pancreas
ALMS1P	2	73713072	2:73713072	2_73713072_G_A_b37	rs13392872	2.4e-15	0.95	Brain - Cerebellum
NAT8	2	73713072	2:73713072	2_73713072_G_A_b37	rs13392872	1.8e-15	0.64	Adipose - Subcutaneous
ALMS1P	2	73713072	2:73713072	2_73713072_G_A_b37	rs13392872	2.8e-16	0.84	Prostate
ALMS1P	2	73713072	2:73713072	2_73713072_G_A_b37	rs13392872	1.8e-16	0.54	Muscle - Skeletal
ALMS1P	2	73713072	2:73713072	2_73713072_G_A_b37	rs13392872	3e-17	0.61	Adipose - Subcutaneous
NAT8	2	73713072	2:73713072	2_73713072_G_A_b37	rs13392872	5.2e-18	0.66	Thyroid
ALMS1P	2	73713072	2:73713072	2_73713072_G_A_b37	rs13392872	4.2e-18	0.67	Esophagus - Muscularis
ALMS1P	2	73713072	2:73713072	2_73713072_G_A_b37	rs13392872	1.9e-18	0.55	Artery - Tibial
ALMS1P	2	73713072	2:73713072	2_73713072_G_A_b37	rs13392872	6.7e-20	0.68	Skin - Sun Exposed (Lower leg)
ALMS1P	2	73713072	2:73713072	2_73713072_G_A_b37	rs13392872	4.3e-21	0.86	Testis
ALMS1P	2	73713072	2:73713072	2_73713072_G_A_b37	rs13392872	2e-21	0.75	Skin - Not Sun Exposed (Suprapubic)
ALMS1P	2	73713072	2:73713072	2_73713072_G_A_b37	rs13392872	1.1e-23	1	Pituitary
ALMS1P	2	73713072	2:73713072	2_73713072_G_A_b37	rs13392872	1.3e-30	0.79	Nerve - Tibial
ALMS1P	2	73713072	2:73713072	2_73713072_G_A_b37	rs13392872	1.1e-35	0.84	Thyroid
ALMS1	2	73726605	2:73726605	2_73726605_A_G_b37	rs58603761	6.9e-07	0.18	Muscle - Skeletal	Alstrom syndrome, 203800 (3), Autosomal recessive
NAT8	2	73726605	2:73726605	2_73726605_A_G_b37	rs58603761	4.4e-07	0.71	Brain - Cortex
TPRKB	2	73726605	2:73726605	2_73726605_A_G_b37	rs58603761	1.9e-07	-0.26	Testis	Galloway-Mowat syndrome 5, 617731 (3), Autosomal recessive
NAT8	2	73726605	2:73726605	2_73726605_A_G_b37	rs58603761	1.7e-07	0.58	Pituitary
NAT8	2	73726605	2:73726605	2_73726605_A_G_b37	rs58603761	9.6e-08	0.46	Skin - Not Sun Exposed (Suprapubic)
ALMS1P	2	73726605	2:73726605	2_73726605_A_G_b37	rs58603761	7.4e-08	0.4	Whole Blood
TPRKB	2	73726605	2:73726605	2_73726605_A_G_b37	rs58603761	3.7e-08	-0.21	Artery - Tibial	Galloway-Mowat syndrome 5, 617731 (3), Autosomal recessive
ALMS1	2	73726605	2:73726605	2_73726605_A_G_b37	rs58603761	2.6e-08	0.24	Skin - Not Sun Exposed (Suprapubic)	Alstrom syndrome, 203800 (3), Autosomal recessive
ALMS1P	2	73726605	2:73726605	2_73726605_A_G_b37	rs58603761	1.8e-08	0.56	Heart - Left Ventricle
ALMS1P	2	73726605	2:73726605	2_73726605_A_G_b37	rs58603761	1.1e-08	0.57	Artery - Coronary
ALMS1P	2	73726605	2:73726605	2_73726605_A_G_b37	rs58603761	9e-09	0.32	Lung
NAT8	2	73726605	2:73726605	2_73726605_A_G_b37	rs58603761	6.7e-09	0.49	Nerve - Tibial
ALMS1P	2	73726605	2:73726605	2_73726605_A_G_b37	rs58603761	4.2e-09	0.62	Adrenal Gland
ALMS1P	2	73726605	2:73726605	2_73726605_A_G_b37	rs58603761	1.7e-09	0.48	Adipose - Visceral (Omentum)
NAT8	2	73726605	2:73726605	2_73726605_A_G_b37	rs58603761	1.3e-09	0.83	Brain - Cerebellum
ALMS1P	2	73726605	2:73726605	2_73726605_A_G_b37	rs58603761	6.2e-10	0.58	Cells - Transformed fibroblasts
ALMS1P	2	73726605	2:73726605	2_73726605_A_G_b37	rs58603761	5.3e-10	0.65	Prostate
NAT8	2	73726605	2:73726605	2_73726605_A_G_b37	rs58603761	4e-10	0.71	Esophagus - Gastroesophageal Junction
ALMS1P	2	73726605	2:73726605	2_73726605_A_G_b37	rs58603761	1.7e-10	0.77	Brain - Cerebellar Hemisphere
NAT8	2	73726605	2:73726605	2_73726605_A_G_b37	rs58603761	1.5e-10	0.66	Pancreas
ALMS1P	2	73726605	2:73726605	2_73726605_A_G_b37	rs58603761	1.3e-10	0.61	Colon - Sigmoid
ALMS1	2	73726605	2:73726605	2_73726605_A_G_b37	rs58603761	1.2e-10	0.2	Whole Blood	Alstrom syndrome, 203800 (3), Autosomal recessive
ALMS1P	2	73726605	2:73726605	2_73726605_A_G_b37	rs58603761	1e-10	0.59	Colon - Transverse
ALMS1P	2	73726605	2:73726605	2_73726605_A_G_b37	rs58603761	9.4e-11	0.65	Esophagus - Gastroesophageal Junction
NAT8	2	73726605	2:73726605	2_73726605_A_G_b37	rs58603761	8.8e-11	0.5	Artery - Tibial
ALMS1P	2	73726605	2:73726605	2_73726605_A_G_b37	rs58603761	8.5e-11	0.58	Heart - Atrial Appendage
ALMS1P	2	73726605	2:73726605	2_73726605_A_G_b37	rs58603761	3.8e-11	0.65	Stomach
ALMS1P	2	73726605	2:73726605	2_73726605_A_G_b37	rs58603761	2.4e-11	0.78	Small Intestine - Terminal Ileum
NAT8	2	73726605	2:73726605	2_73726605_A_G_b37	rs58603761	2.3e-11	0.51	Skin - Sun Exposed (Lower leg)
ALMS1P	2	73726605	2:73726605	2_73726605_A_G_b37	rs58603761	6.2e-13	0.59	Esophagus - Mucosa
ALMS1P	2	73726605	2:73726605	2_73726605_A_G_b37	rs58603761	4.4e-13	0.88	Brain - Cerebellum
ALMS1P	2	73726605	2:73726605	2_73726605_A_G_b37	rs58603761	2.9e-14	0.72	Pancreas
NAT8	2	73726605	2:73726605	2_73726605_A_G_b37	rs58603761	1.6e-15	0.65	Adipose - Subcutaneous
ALMS1P	2	73726605	2:73726605	2_73726605_A_G_b37	rs58603761	8.4e-16	0.53	Muscle - Skeletal
ALMS1P	2	73726605	2:73726605	2_73726605_A_G_b37	rs58603761	2.7e-16	0.6	Adipose - Subcutaneous
ALMS1P	2	73726605	2:73726605	2_73726605_A_G_b37	rs58603761	9.6e-17	0.64	Esophagus - Muscularis
NAT8	2	73726605	2:73726605	2_73726605_A_G_b37	rs58603761	5.7e-17	0.64	Thyroid
ALMS1P	2	73726605	2:73726605	2_73726605_A_G_b37	rs58603761	3.9e-17	0.55	Artery - Tibial
ALMS1P	2	73726605	2:73726605	2_73726605_A_G_b37	rs58603761	3.4e-18	0.65	Skin - Sun Exposed (Lower leg)
ALMS1P	2	73726605	2:73726605	2_73726605_A_G_b37	rs58603761	3.4e-18	0.8	Testis
ALMS1P	2	73726605	2:73726605	2_73726605_A_G_b37	rs58603761	3.7e-20	0.74	Skin - Not Sun Exposed (Suprapubic)
ALMS1P	2	73726605	2:73726605	2_73726605_A_G_b37	rs58603761	1.3e-24	1	Pituitary
ALMS1P	2	73726605	2:73726605	2_73726605_A_G_b37	rs58603761	1.6e-26	0.75	Nerve - Tibial
ALMS1P	2	73726605	2:73726605	2_73726605_A_G_b37	rs58603761	1.4e-34	0.82	Thyroid
NAT8	2	73751966	2:73751966	2_73751966_G_A_b37	rs7567585	6.7e-07	0.7	Brain - Cortex
ALMS1	2	73751966	2:73751966	2_73751966_G_A_b37	rs7567585	5.8e-07	0.18	Muscle - Skeletal	Alstrom syndrome, 203800 (3), Autosomal recessive
TPRKB	2	73751966	2:73751966	2_73751966_G_A_b37	rs7567585	1.9e-07	-0.26	Testis	Galloway-Mowat syndrome 5, 617731 (3), Autosomal recessive
NAT8	2	73751966	2:73751966	2_73751966_G_A_b37	rs7567585	1.6e-07	0.57	Pituitary
TPRKB	2	73751966	2:73751966	2_73751966_G_A_b37	rs7567585	9.4e-08	-0.2	Artery - Tibial	Galloway-Mowat syndrome 5, 617731 (3), Autosomal recessive
ALMS1P	2	73751966	2:73751966	2_73751966_G_A_b37	rs7567585	7.2e-08	0.4	Whole Blood
ALMS1	2	73751966	2:73751966	2_73751966_G_A_b37	rs7567585	6.1e-08	0.23	Skin - Not Sun Exposed (Suprapubic)	Alstrom syndrome, 203800 (3), Autosomal recessive
ALMS1P	2	73751966	2:73751966	2_73751966_G_A_b37	rs7567585	1.1e-08	0.57	Artery - Coronary
ALMS1P	2	73751966	2:73751966	2_73751966_G_A_b37	rs7567585	9.7e-09	0.31	Lung
ALMS1P	2	73751966	2:73751966	2_73751966_G_A_b37	rs7567585	6.7e-09	0.57	Heart - Left Ventricle
NAT8	2	73751966	2:73751966	2_73751966_G_A_b37	rs7567585	4.5e-09	0.49	Nerve - Tibial
ALMS1P	2	73751966	2:73751966	2_73751966_G_A_b37	rs7567585	4.2e-09	0.62	Adrenal Gland
ALMS1P	2	73751966	2:73751966	2_73751966_G_A_b37	rs7567585	2.2e-09	0.47	Adipose - Visceral (Omentum)
NAT8	2	73751966	2:73751966	2_73751966_G_A_b37	rs7567585	1.4e-09	0.83	Brain - Cerebellum
NAT8	2	73751966	2:73751966	2_73751966_G_A_b37	rs7567585	8.1e-10	0.7	Esophagus - Gastroesophageal Junction
ALMS1P	2	73751966	2:73751966	2_73751966_G_A_b37	rs7567585	6.2e-10	0.58	Cells - Transformed fibroblasts
ALMS1P	2	73751966	2:73751966	2_73751966_G_A_b37	rs7567585	5.3e-10	0.65	Prostate
ALMS1P	2	73751966	2:73751966	2_73751966_G_A_b37	rs7567585	4.5e-10	0.6	Colon - Sigmoid
ALMS1P	2	73751966	2:73751966	2_73751966_G_A_b37	rs7567585	3.5e-10	0.63	Esophagus - Gastroesophageal Junction
ALMS1P	2	73751966	2:73751966	2_73751966_G_A_b37	rs7567585	2.2e-10	0.58	Colon - Transverse
ALMS1	2	73751966	2:73751966	2_73751966_G_A_b37	rs7567585	1.5e-10	0.2	Whole Blood	Alstrom syndrome, 203800 (3), Autosomal recessive
NAT8	2	73751966	2:73751966	2_73751966_G_A_b37	rs7567585	1.5e-10	0.66	Pancreas
NAT8	2	73751966	2:73751966	2_73751966_G_A_b37	rs7567585	1.3e-10	0.49	Artery - Tibial
ALMS1P	2	73751966	2:73751966	2_73751966_G_A_b37	rs7567585	8.5e-11	0.58	Heart - Atrial Appendage
ALMS1P	2	73751966	2:73751966	2_73751966_G_A_b37	rs7567585	6.5e-11	0.78	Small Intestine - Terminal Ileum
ALMS1P	2	73751966	2:73751966	2_73751966_G_A_b37	rs7567585	4.7e-11	0.79	Brain - Cerebellar Hemisphere
NAT8	2	73751966	2:73751966	2_73751966_G_A_b37	rs7567585	3.2e-11	0.51	Skin - Sun Exposed (Lower leg)
ALMS1P	2	73751966	2:73751966	2_73751966_G_A_b37	rs7567585	3e-11	0.64	Stomach
ALMS1P	2	73751966	2:73751966	2_73751966_G_A_b37	rs7567585	9.2e-13	0.88	Brain - Cerebellum
ALMS1P	2	73751966	2:73751966	2_73751966_G_A_b37	rs7567585	8.5e-13	0.59	Esophagus - Mucosa
ALMS1P	2	73751966	2:73751966	2_73751966_G_A_b37	rs7567585	1.5e-14	0.72	Pancreas
NAT8	2	73751966	2:73751966	2_73751966_G_A_b37	rs7567585	1.7e-15	0.65	Adipose - Subcutaneous
ALMS1P	2	73751966	2:73751966	2_73751966_G_A_b37	rs7567585	2.6e-16	0.54	Muscle - Skeletal
ALMS1P	2	73751966	2:73751966	2_73751966_G_A_b37	rs7567585	2.1e-16	0.6	Adipose - Subcutaneous
NAT8	2	73751966	2:73751966	2_73751966_G_A_b37	rs7567585	7.4e-17	0.64	Thyroid
ALMS1P	2	73751966	2:73751966	2_73751966_G_A_b37	rs7567585	4e-17	0.64	Esophagus - Muscularis
ALMS1P	2	73751966	2:73751966	2_73751966_G_A_b37	rs7567585	1.6e-17	0.55	Artery - Tibial
ALMS1P	2	73751966	2:73751966	2_73751966_G_A_b37	rs7567585	5.3e-18	0.64	Skin - Sun Exposed (Lower leg)
ALMS1P	2	73751966	2:73751966	2_73751966_G_A_b37	rs7567585	3.4e-18	0.8	Testis
ALMS1P	2	73751966	2:73751966	2_73751966_G_A_b37	rs7567585	7e-19	0.71	Skin - Not Sun Exposed (Suprapubic)
ALMS1P	2	73751966	2:73751966	2_73751966_G_A_b37	rs7567585	2.7e-24	1	Pituitary
ALMS1P	2	73751966	2:73751966	2_73751966_G_A_b37	rs7567585	3.4e-26	0.75	Nerve - Tibial
ALMS1P	2	73751966	2:73751966	2_73751966_G_A_b37	rs7567585	1.6e-34	0.82	Thyroid
NAT8	2	73773503	2:73773503	2_73773503_G_A_b37	rs10496193	5.2e-07	0.43	Skin - Not Sun Exposed (Suprapubic)
ALMS1	2	73773503	2:73773503	2_73773503_G_A_b37	rs10496193	3.1e-07	0.18	Muscle - Skeletal	Alstrom syndrome, 203800 (3), Autosomal recessive
TPRKB	2	73773503	2:73773503	2_73773503_G_A_b37	rs10496193	1.9e-07	-0.26	Testis	Galloway-Mowat syndrome 5, 617731 (3), Autosomal recessive
NAT8	2	73773503	2:73773503	2_73773503_G_A_b37	rs10496193	1.7e-07	0.58	Pituitary
TPRKB	2	73773503	2:73773503	2_73773503_G_A_b37	rs10496193	1.2e-07	-0.2	Artery - Tibial	Galloway-Mowat syndrome 5, 617731 (3), Autosomal recessive
ALMS1P	2	73773503	2:73773503	2_73773503_G_A_b37	rs10496193	7.4e-08	0.4	Whole Blood
ALMS1	2	73773503	2:73773503	2_73773503_G_A_b37	rs10496193	1.8e-08	0.24	Skin - Not Sun Exposed (Suprapubic)	Alstrom syndrome, 203800 (3), Autosomal recessive
ALMS1P	2	73773503	2:73773503	2_73773503_G_A_b37	rs10496193	1.1e-08	0.57	Artery - Coronary
ALMS1P	2	73773503	2:73773503	2_73773503_G_A_b37	rs10496193	6.7e-09	0.57	Heart - Left Ventricle
NAT8	2	73773503	2:73773503	2_73773503_G_A_b37	rs10496193	5.9e-09	0.79	Brain - Cerebellum
ALMS1P	2	73773503	2:73773503	2_73773503_G_A_b37	rs10496193	4.5e-09	0.32	Lung
ALMS1P	2	73773503	2:73773503	2_73773503_G_A_b37	rs10496193	4.2e-09	0.62	Adrenal Gland
NAT8	2	73773503	2:73773503	2_73773503_G_A_b37	rs10496193	3.2e-09	0.49	Nerve - Tibial
NAT8	2	73773503	2:73773503	2_73773503_G_A_b37	rs10496193	3e-09	0.67	Esophagus - Gastroesophageal Junction
ALMS1P	2	73773503	2:73773503	2_73773503_G_A_b37	rs10496193	1.8e-09	0.47	Adipose - Visceral (Omentum)
ALMS1P	2	73773503	2:73773503	2_73773503_G_A_b37	rs10496193	5.7e-10	0.62	Esophagus - Gastroesophageal Junction
ALMS1P	2	73773503	2:73773503	2_73773503_G_A_b37	rs10496193	5.3e-10	0.65	Prostate
ALMS1P	2	73773503	2:73773503	2_73773503_G_A_b37	rs10496193	3.9e-10	0.59	Cells - Transformed fibroblasts
NAT8	2	73773503	2:73773503	2_73773503_G_A_b37	rs10496193	2.1e-10	0.49	Artery - Tibial
NAT8	2	73773503	2:73773503	2_73773503_G_A_b37	rs10496193	1.5e-10	0.66	Pancreas
ALMS1P	2	73773503	2:73773503	2_73773503_G_A_b37	rs10496193	1.3e-10	0.61	Colon - Sigmoid
ALMS1	2	73773503	2:73773503	2_73773503_G_A_b37	rs10496193	1.2e-10	0.2	Whole Blood	Alstrom syndrome, 203800 (3), Autosomal recessive
ALMS1P	2	73773503	2:73773503	2_73773503_G_A_b37	rs10496193	1e-10	0.59	Colon - Transverse
ALMS1P	2	73773503	2:73773503	2_73773503_G_A_b37	rs10496193	8.5e-11	0.58	Heart - Atrial Appendage
ALMS1P	2	73773503	2:73773503	2_73773503_G_A_b37	rs10496193	7.8e-11	0.77	Brain - Cerebellar Hemisphere
ALMS1P	2	73773503	2:73773503	2_73773503_G_A_b37	rs10496193	6.5e-11	0.78	Small Intestine - Terminal Ileum
ALMS1P	2	73773503	2:73773503	2_73773503_G_A_b37	rs10496193	3e-11	0.64	Stomach
NAT8	2	73773503	2:73773503	2_73773503_G_A_b37	rs10496193	2.8e-11	0.51	Skin - Sun Exposed (Lower leg)
ALMS1P	2	73773503	2:73773503	2_73773503_G_A_b37	rs10496193	2.2e-12	0.57	Esophagus - Mucosa
ALMS1P	2	73773503	2:73773503	2_73773503_G_A_b37	rs10496193	1.6e-12	0.85	Brain - Cerebellum
ALMS1P	2	73773503	2:73773503	2_73773503_G_A_b37	rs10496193	1.5e-14	0.72	Pancreas
NAT8	2	73773503	2:73773503	2_73773503_G_A_b37	rs10496193	1.2e-15	0.65	Adipose - Subcutaneous
ALMS1P	2	73773503	2:73773503	2_73773503_G_A_b37	rs10496193	9.3e-16	0.59	Adipose - Subcutaneous
NAT8	2	73773503	2:73773503	2_73773503_G_A_b37	rs10496193	3.8e-16	0.62	Thyroid
ALMS1P	2	73773503	2:73773503	2_73773503_G_A_b37	rs10496193	3.3e-16	0.54	Muscle - Skeletal
ALMS1P	2	73773503	2:73773503	2_73773503_G_A_b37	rs10496193	8.6e-17	0.54	Artery - Tibial
ALMS1P	2	73773503	2:73773503	2_73773503_G_A_b37	rs10496193	4e-17	0.64	Esophagus - Muscularis
ALMS1P	2	73773503	2:73773503	2_73773503_G_A_b37	rs10496193	9.9e-18	0.64	Skin - Sun Exposed (Lower leg)
ALMS1P	2	73773503	2:73773503	2_73773503_G_A_b37	rs10496193	3.4e-18	0.8	Testis
ALMS1P	2	73773503	2:73773503	2_73773503_G_A_b37	rs10496193	4.1e-19	0.71	Skin - Not Sun Exposed (Suprapubic)
ALMS1P	2	73773503	2:73773503	2_73773503_G_A_b37	rs10496193	1.3e-24	1	Pituitary
ALMS1P	2	73773503	2:73773503	2_73773503_G_A_b37	rs10496193	1.9e-26	0.75	Nerve - Tibial
ALMS1P	2	73773503	2:73773503	2_73773503_G_A_b37	rs10496193	2e-33	0.81	Thyroid
TPRKB	2	73785358	2:73785358	2_73785358_A_G_b37	rs6546847	7.2e-07	-0.15	Muscle - Skeletal	Galloway-Mowat syndrome 5, 617731 (3), Autosomal recessive
NAT8	2	73785358	2:73785358	2_73785358_A_G_b37	rs6546847	6.3e-07	0.39	Esophagus - Muscularis
TPRKB	2	73785358	2:73785358	2_73785358_A_G_b37	rs6546847	4e-07	-0.25	Testis	Galloway-Mowat syndrome 5, 617731 (3), Autosomal recessive
NAT8	2	73785358	2:73785358	2_73785358_A_G_b37	rs6546847	2.8e-07	0.57	Pituitary
TPRKB	2	73785358	2:73785358	2_73785358_A_G_b37	rs6546847	1.9e-07	-0.2	Artery - Tibial	Galloway-Mowat syndrome 5, 617731 (3), Autosomal recessive
ALMS1P	2	73785358	2:73785358	2_73785358_A_G_b37	rs6546847	7.8e-08	0.4	Whole Blood
ALMS1P	2	73785358	2:73785358	2_73785358_A_G_b37	rs6546847	5.3e-08	0.54	Artery - Coronary
ALMS1	2	73785358	2:73785358	2_73785358_A_G_b37	rs6546847	5.1e-08	0.23	Skin - Not Sun Exposed (Suprapubic)	Alstrom syndrome, 203800 (3), Autosomal recessive
NAT8	2	73785358	2:73785358	2_73785358_A_G_b37	rs6546847	2.1e-08	0.64	Esophagus - Gastroesophageal Junction
ALMS1P	2	73785358	2:73785358	2_73785358_A_G_b37	rs6546847	1.2e-08	0.6	Adrenal Gland
ALMS1P	2	73785358	2:73785358	2_73785358_A_G_b37	rs6546847	6.8e-09	0.32	Lung
NAT8	2	73785358	2:73785358	2_73785358_A_G_b37	rs6546847	4.3e-09	0.49	Nerve - Tibial
ALMS1P	2	73785358	2:73785358	2_73785358_A_G_b37	rs6546847	3e-09	0.47	Adipose - Visceral (Omentum)
ALMS1P	2	73785358	2:73785358	2_73785358_A_G_b37	rs6546847	2.7e-09	0.58	Heart - Left Ventricle
ALMS1P	2	73785358	2:73785358	2_73785358_A_G_b37	rs6546847	1.1e-09	0.61	Esophagus - Gastroesophageal Junction
ALMS1P	2	73785358	2:73785358	2_73785358_A_G_b37	rs6546847	1e-09	0.64	Prostate
NAT8	2	73785358	2:73785358	2_73785358_A_G_b37	rs6546847	7.6e-10	0.47	Artery - Tibial
NAT8	2	73785358	2:73785358	2_73785358_A_G_b37	rs6546847	6.8e-10	0.64	Pancreas
ALMS1P	2	73785358	2:73785358	2_73785358_A_G_b37	rs6546847	6.4e-10	0.57	Colon - Transverse
NAT8	2	73785358	2:73785358	2_73785358_A_G_b37	rs6546847	3.4e-10	0.85	Brain - Cerebellum
ALMS1P	2	73785358	2:73785358	2_73785358_A_G_b37	rs6546847	2.1e-10	0.56	Heart - Atrial Appendage
ALMS1P	2	73785358	2:73785358	2_73785358_A_G_b37	rs6546847	2e-10	0.61	Colon - Sigmoid
ALMS1P	2	73785358	2:73785358	2_73785358_A_G_b37	rs6546847	1.7e-10	0.61	Cells - Transformed fibroblasts
ALMS1P	2	73785358	2:73785358	2_73785358_A_G_b37	rs6546847	8.5e-11	0.77	Small Intestine - Terminal Ileum
ALMS1P	2	73785358	2:73785358	2_73785358_A_G_b37	rs6546847	7.8e-11	0.77	Brain - Cerebellar Hemisphere
ALMS1	2	73785358	2:73785358	2_73785358_A_G_b37	rs6546847	4.6e-11	0.2	Whole Blood	Alstrom syndrome, 203800 (3), Autosomal recessive
NAT8	2	73785358	2:73785358	2_73785358_A_G_b37	rs6546847	2.3e-11	0.51	Skin - Sun Exposed (Lower leg)
ALMS1P	2	73785358	2:73785358	2_73785358_A_G_b37	rs6546847	3.7e-12	0.85	Brain - Cerebellum
ALMS1P	2	73785358	2:73785358	2_73785358_A_G_b37	rs6546847	1.7e-12	0.58	Esophagus - Mucosa
ALMS1P	2	73785358	2:73785358	2_73785358_A_G_b37	rs6546847	1.7e-12	0.68	Stomach
ALMS1P	2	73785358	2:73785358	2_73785358_A_G_b37	rs6546847	8.9e-15	0.51	Muscle - Skeletal
ALMS1P	2	73785358	2:73785358	2_73785358_A_G_b37	rs6546847	3.9e-15	0.74	Pancreas
ALMS1P	2	73785358	2:73785358	2_73785358_A_G_b37	rs6546847	3.4e-15	0.58	Adipose - Subcutaneous
NAT8	2	73785358	2:73785358	2_73785358_A_G_b37	rs6546847	1.8e-15	0.65	Adipose - Subcutaneous
NAT8	2	73785358	2:73785358	2_73785358_A_G_b37	rs6546847	1.3e-15	0.61	Thyroid
ALMS1P	2	73785358	2:73785358	2_73785358_A_G_b37	rs6546847	5.9e-16	0.52	Artery - Tibial
ALMS1P	2	73785358	2:73785358	2_73785358_A_G_b37	rs6546847	1.2e-16	0.63	Esophagus - Muscularis
ALMS1P	2	73785358	2:73785358	2_73785358_A_G_b37	rs6546847	5.4e-17	0.76	Testis
ALMS1P	2	73785358	2:73785358	2_73785358_A_G_b37	rs6546847	8.6e-18	0.64	Skin - Sun Exposed (Lower leg)
ALMS1P	2	73785358	2:73785358	2_73785358_A_G_b37	rs6546847	3.5e-19	0.71	Skin - Not Sun Exposed (Suprapubic)
ALMS1P	2	73785358	2:73785358	2_73785358_A_G_b37	rs6546847	3.4e-24	1	Pituitary
ALMS1P	2	73785358	2:73785358	2_73785358_A_G_b37	rs6546847	3.7e-26	0.74	Nerve - Tibial
ALMS1P	2	73785358	2:73785358	2_73785358_A_G_b37	rs6546847	3.8e-33	0.8	Thyroid
MOGS	2	73788026	2:73788026	2_73788026_G_A_b37	rs7604682	6.1e-05	0.17	Cells - Transformed fibroblasts	Congenital disorder of glycosylation, type IIb, 606056 (3), Autosomal recessive
ALMS1	2	73788026	2:73788026	2_73788026_G_A_b37	rs7604682	8.4e-07	0.18	Muscle - Skeletal	Alstrom syndrome, 203800 (3), Autosomal recessive
NAT8	2	73788026	2:73788026	2_73788026_G_A_b37	rs7604682	5.2e-07	0.43	Skin - Not Sun Exposed (Suprapubic)
TPRKB	2	73788026	2:73788026	2_73788026_G_A_b37	rs7604682	4.7e-07	-0.25	Testis	Galloway-Mowat syndrome 5, 617731 (3), Autosomal recessive
NAT8	2	73788026	2:73788026	2_73788026_G_A_b37	rs7604682	1.6e-07	0.57	Pituitary
TPRKB	2	73788026	2:73788026	2_73788026_G_A_b37	rs7604682	1.4e-07	-0.2	Artery - Tibial	Galloway-Mowat syndrome 5, 617731 (3), Autosomal recessive
ALMS1P	2	73788026	2:73788026	2_73788026_G_A_b37	rs7604682	6.5e-08	0.4	Whole Blood
ALMS1P	2	73788026	2:73788026	2_73788026_G_A_b37	rs7604682	6.2e-08	0.54	Artery - Coronary
ALMS1	2	73788026	2:73788026	2_73788026_G_A_b37	rs7604682	1.6e-08	0.24	Skin - Not Sun Exposed (Suprapubic)	Alstrom syndrome, 203800 (3), Autosomal recessive
ALMS1P	2	73788026	2:73788026	2_73788026_G_A_b37	rs7604682	6.2e-09	0.57	Heart - Left Ventricle
ALMS1P	2	73788026	2:73788026	2_73788026_G_A_b37	rs7604682	4.2e-09	0.62	Adrenal Gland
ALMS1P	2	73788026	2:73788026	2_73788026_G_A_b37	rs7604682	3.9e-09	0.32	Lung
NAT8	2	73788026	2:73788026	2_73788026_G_A_b37	rs7604682	3e-09	0.67	Esophagus - Gastroesophageal Junction
ALMS1P	2	73788026	2:73788026	2_73788026_G_A_b37	rs7604682	2e-09	0.47	Adipose - Visceral (Omentum)
NAT8	2	73788026	2:73788026	2_73788026_G_A_b37	rs7604682	1.4e-09	0.82	Brain - Cerebellum
NAT8	2	73788026	2:73788026	2_73788026_G_A_b37	rs7604682	6.7e-10	0.47	Artery - Tibial
NAT8	2	73788026	2:73788026	2_73788026_G_A_b37	rs7604682	6.6e-10	0.51	Nerve - Tibial
ALMS1P	2	73788026	2:73788026	2_73788026_G_A_b37	rs7604682	5.7e-10	0.62	Esophagus - Gastroesophageal Junction
ALMS1P	2	73788026	2:73788026	2_73788026_G_A_b37	rs7604682	5.3e-10	0.65	Prostate
ALMS1P	2	73788026	2:73788026	2_73788026_G_A_b37	rs7604682	4.3e-10	0.6	Colon - Sigmoid
NAT8	2	73788026	2:73788026	2_73788026_G_A_b37	rs7604682	2.3e-10	0.66	Pancreas
ALMS1P	2	73788026	2:73788026	2_73788026_G_A_b37	rs7604682	2.1e-10	0.57	Heart - Atrial Appendage
ALMS1P	2	73788026	2:73788026	2_73788026_G_A_b37	rs7604682	1.6e-10	0.6	Cells - Transformed fibroblasts
ALMS1P	2	73788026	2:73788026	2_73788026_G_A_b37	rs7604682	1.5e-10	0.59	Colon - Transverse
ALMS1	2	73788026	2:73788026	2_73788026_G_A_b37	rs7604682	1.4e-10	0.2	Whole Blood	Alstrom syndrome, 203800 (3), Autosomal recessive
ALMS1P	2	73788026	2:73788026	2_73788026_G_A_b37	rs7604682	7.8e-11	0.77	Brain - Cerebellar Hemisphere
ALMS1P	2	73788026	2:73788026	2_73788026_G_A_b37	rs7604682	5.8e-11	0.78	Small Intestine - Terminal Ileum
NAT8	2	73788026	2:73788026	2_73788026_G_A_b37	rs7604682	3.1e-11	0.51	Skin - Sun Exposed (Lower leg)
ALMS1P	2	73788026	2:73788026	2_73788026_G_A_b37	rs7604682	2.3e-11	0.65	Stomach
ALMS1P	2	73788026	2:73788026	2_73788026_G_A_b37	rs7604682	2.4e-12	0.85	Brain - Cerebellum
ALMS1P	2	73788026	2:73788026	2_73788026_G_A_b37	rs7604682	6.7e-13	0.59	Esophagus - Mucosa
ALMS1P	2	73788026	2:73788026	2_73788026_G_A_b37	rs7604682	8.8e-15	0.73	Pancreas
ALMS1P	2	73788026	2:73788026	2_73788026_G_A_b37	rs7604682	1.8e-15	0.59	Adipose - Subcutaneous
NAT8	2	73788026	2:73788026	2_73788026_G_A_b37	rs7604682	1.8e-15	0.61	Thyroid
ALMS1P	2	73788026	2:73788026	2_73788026_G_A_b37	rs7604682	1.4e-15	0.52	Muscle - Skeletal
NAT8	2	73788026	2:73788026	2_73788026_G_A_b37	rs7604682	9.3e-16	0.66	Adipose - Subcutaneous
ALMS1P	2	73788026	2:73788026	2_73788026_G_A_b37	rs7604682	3.8e-16	0.52	Artery - Tibial
ALMS1P	2	73788026	2:73788026	2_73788026_G_A_b37	rs7604682	2e-16	0.76	Testis
ALMS1P	2	73788026	2:73788026	2_73788026_G_A_b37	rs7604682	4.3e-17	0.64	Esophagus - Muscularis
ALMS1P	2	73788026	2:73788026	2_73788026_G_A_b37	rs7604682	1.6e-17	0.63	Skin - Sun Exposed (Lower leg)
ALMS1P	2	73788026	2:73788026	2_73788026_G_A_b37	rs7604682	5.2e-19	0.71	Skin - Not Sun Exposed (Suprapubic)
ALMS1P	2	73788026	2:73788026	2_73788026_G_A_b37	rs7604682	1.2e-24	1	Pituitary
ALMS1P	2	73788026	2:73788026	2_73788026_G_A_b37	rs7604682	1.7e-26	0.75	Nerve - Tibial
ALMS1P	2	73788026	2:73788026	2_73788026_G_A_b37	rs7604682	5.2e-32	0.79	Thyroid
RP11-434P11.2	2	73849170	2:73849170	2_73849170_C_G_b37	rs6705977	5.6e-05	0.27	Skin - Sun Exposed (Lower leg)
ALMS1	2	73849170	2:73849170	2_73849170_C_G_b37	rs6705977	6.3e-07	0.18	Muscle - Skeletal	Alstrom syndrome, 203800 (3), Autosomal recessive
ALMS1P	2	73849170	2:73849170	2_73849170_C_G_b37	rs6705977	6e-07	0.36	Whole Blood
NAT8	2	73849170	2:73849170	2_73849170_C_G_b37	rs6705977	4.1e-07	0.4	Esophagus - Muscularis
TPRKB	2	73849170	2:73849170	2_73849170_C_G_b37	rs6705977	4e-07	-0.26	Testis	Galloway-Mowat syndrome 5, 617731 (3), Autosomal recessive
NAT8	2	73849170	2:73849170	2_73849170_C_G_b37	rs6705977	4e-07	0.44	Skin - Not Sun Exposed (Suprapubic)
ALMS1	2	73849170	2:73849170	2_73849170_C_G_b37	rs6705977	3.8e-07	0.22	Skin - Not Sun Exposed (Suprapubic)	Alstrom syndrome, 203800 (3), Autosomal recessive
NAT8	2	73849170	2:73849170	2_73849170_C_G_b37	rs6705977	2.8e-07	0.57	Pituitary
TPRKB	2	73849170	2:73849170	2_73849170_C_G_b37	rs6705977	2.5e-07	-0.15	Muscle - Skeletal	Galloway-Mowat syndrome 5, 617731 (3), Autosomal recessive
NAT8	2	73849170	2:73849170	2_73849170_C_G_b37	rs6705977	9.7e-08	0.44	Nerve - Tibial
ALMS1P	2	73849170	2:73849170	2_73849170_C_G_b37	rs6705977	2.9e-08	0.3	Lung
ALMS1P	2	73849170	2:73849170	2_73849170_C_G_b37	rs6705977	2e-08	0.6	Adrenal Gland
ALMS1P	2	73849170	2:73849170	2_73849170_C_G_b37	rs6705977	1.3e-08	0.53	Cells - Transformed fibroblasts
ALMS1P	2	73849170	2:73849170	2_73849170_C_G_b37	rs6705977	1e-08	0.56	Artery - Coronary
ALMS1P	2	73849170	2:73849170	2_73849170_C_G_b37	rs6705977	8.9e-09	0.56	Heart - Left Ventricle
TPRKB	2	73849170	2:73849170	2_73849170_C_G_b37	rs6705977	7.7e-09	-0.22	Artery - Tibial	Galloway-Mowat syndrome 5, 617731 (3), Autosomal recessive
NAT8	2	73849170	2:73849170	2_73849170_C_G_b37	rs6705977	8.2e-10	0.7	Esophagus - Gastroesophageal Junction
ALMS1	2	73849170	2:73849170	2_73849170_C_G_b37	rs6705977	7.5e-10	0.19	Whole Blood	Alstrom syndrome, 203800 (3), Autosomal recessive
NAT8	2	73849170	2:73849170	2_73849170_C_G_b37	rs6705977	7.3e-10	0.47	Artery - Tibial
ALMS1P	2	73849170	2:73849170	2_73849170_C_G_b37	rs6705977	3.7e-10	0.63	Esophagus - Gastroesophageal Junction
NAT8	2	73849170	2:73849170	2_73849170_C_G_b37	rs6705977	2.6e-10	0.84	Brain - Cerebellum
ALMS1P	2	73849170	2:73849170	2_73849170_C_G_b37	rs6705977	1.4e-10	0.5	Adipose - Visceral (Omentum)
ALMS1P	2	73849170	2:73849170	2_73849170_C_G_b37	rs6705977	1.3e-10	0.67	Prostate
NAT8	2	73849170	2:73849170	2_73849170_C_G_b37	rs6705977	9.3e-11	0.67	Pancreas
ALMS1P	2	73849170	2:73849170	2_73849170_C_G_b37	rs6705977	7e-11	0.58	Heart - Atrial Appendage
ALMS1P	2	73849170	2:73849170	2_73849170_C_G_b37	rs6705977	6.5e-11	0.6	Colon - Transverse
ALMS1P	2	73849170	2:73849170	2_73849170_C_G_b37	rs6705977	1.7e-11	0.79	Small Intestine - Terminal Ileum
ALMS1P	2	73849170	2:73849170	2_73849170_C_G_b37	rs6705977	5.1e-12	0.66	Colon - Sigmoid
ALMS1P	2	73849170	2:73849170	2_73849170_C_G_b37	rs6705977	3.2e-12	0.57	Esophagus - Mucosa
ALMS1P	2	73849170	2:73849170	2_73849170_C_G_b37	rs6705977	7.7e-13	0.7	Stomach
NAT8	2	73849170	2:73849170	2_73849170_C_G_b37	rs6705977	5.8e-13	0.54	Skin - Sun Exposed (Lower leg)
ALMS1P	2	73849170	2:73849170	2_73849170_C_G_b37	rs6705977	3e-13	0.84	Brain - Cerebellar Hemisphere
NAT8	2	73849170	2:73849170	2_73849170_C_G_b37	rs6705977	2.6e-14	0.63	Adipose - Subcutaneous
ALMS1P	2	73849170	2:73849170	2_73849170_C_G_b37	rs6705977	1.9e-14	0.9	Brain - Cerebellum
ALMS1P	2	73849170	2:73849170	2_73849170_C_G_b37	rs6705977	3.8e-16	0.6	Adipose - Subcutaneous
ALMS1P	2	73849170	2:73849170	2_73849170_C_G_b37	rs6705977	3.6e-16	0.53	Muscle - Skeletal
ALMS1P	2	73849170	2:73849170	2_73849170_C_G_b37	rs6705977	2.7e-16	0.76	Pancreas
ALMS1P	2	73849170	2:73849170	2_73849170_C_G_b37	rs6705977	1.4e-16	0.64	Esophagus - Muscularis
ALMS1P	2	73849170	2:73849170	2_73849170_C_G_b37	rs6705977	7.5e-17	0.53	Artery - Tibial
NAT8	2	73849170	2:73849170	2_73849170_C_G_b37	rs6705977	3.6e-17	0.63	Thyroid
ALMS1P	2	73849170	2:73849170	2_73849170_C_G_b37	rs6705977	1.3e-18	0.64	Skin - Sun Exposed (Lower leg)
ALMS1P	2	73849170	2:73849170	2_73849170_C_G_b37	rs6705977	7.7e-19	0.81	Testis
ALMS1P	2	73849170	2:73849170	2_73849170_C_G_b37	rs6705977	6.9e-20	0.73	Skin - Not Sun Exposed (Suprapubic)
ALMS1P	2	73849170	2:73849170	2_73849170_C_G_b37	rs6705977	1.2e-23	1	Pituitary
ALMS1P	2	73849170	2:73849170	2_73849170_C_G_b37	rs6705977	7.6e-29	0.76	Nerve - Tibial
ALMS1P	2	73849170	2:73849170	2_73849170_C_G_b37	rs6705977	5e-36	0.82	Thyroid
RP11-434P11.2	2	73850820	2:73850820	2_73850820_C_G_b37	rs6711001	5.6e-05	0.27	Skin - Sun Exposed (Lower leg)
ALMS1	2	73850820	2:73850820	2_73850820_C_G_b37	rs6711001	6.3e-07	0.18	Muscle - Skeletal	Alstrom syndrome, 203800 (3), Autosomal recessive
ALMS1P	2	73850820	2:73850820	2_73850820_C_G_b37	rs6711001	6e-07	0.36	Whole Blood
NAT8	2	73850820	2:73850820	2_73850820_C_G_b37	rs6711001	4.1e-07	0.4	Esophagus - Muscularis
TPRKB	2	73850820	2:73850820	2_73850820_C_G_b37	rs6711001	4e-07	-0.26	Testis	Galloway-Mowat syndrome 5, 617731 (3), Autosomal recessive
NAT8	2	73850820	2:73850820	2_73850820_C_G_b37	rs6711001	4e-07	0.44	Skin - Not Sun Exposed (Suprapubic)
ALMS1	2	73850820	2:73850820	2_73850820_C_G_b37	rs6711001	3.8e-07	0.22	Skin - Not Sun Exposed (Suprapubic)	Alstrom syndrome, 203800 (3), Autosomal recessive
NAT8	2	73850820	2:73850820	2_73850820_C_G_b37	rs6711001	2.8e-07	0.57	Pituitary
TPRKB	2	73850820	2:73850820	2_73850820_C_G_b37	rs6711001	2.5e-07	-0.15	Muscle - Skeletal	Galloway-Mowat syndrome 5, 617731 (3), Autosomal recessive
NAT8	2	73850820	2:73850820	2_73850820_C_G_b37	rs6711001	9.7e-08	0.44	Nerve - Tibial
ALMS1P	2	73850820	2:73850820	2_73850820_C_G_b37	rs6711001	2.9e-08	0.3	Lung
ALMS1P	2	73850820	2:73850820	2_73850820_C_G_b37	rs6711001	2e-08	0.6	Adrenal Gland
ALMS1P	2	73850820	2:73850820	2_73850820_C_G_b37	rs6711001	1.3e-08	0.53	Cells - Transformed fibroblasts
ALMS1P	2	73850820	2:73850820	2_73850820_C_G_b37	rs6711001	1e-08	0.56	Artery - Coronary
ALMS1P	2	73850820	2:73850820	2_73850820_C_G_b37	rs6711001	8.9e-09	0.56	Heart - Left Ventricle
TPRKB	2	73850820	2:73850820	2_73850820_C_G_b37	rs6711001	7.7e-09	-0.22	Artery - Tibial	Galloway-Mowat syndrome 5, 617731 (3), Autosomal recessive
NAT8	2	73850820	2:73850820	2_73850820_C_G_b37	rs6711001	8.2e-10	0.7	Esophagus - Gastroesophageal Junction
ALMS1	2	73850820	2:73850820	2_73850820_C_G_b37	rs6711001	7.5e-10	0.19	Whole Blood	Alstrom syndrome, 203800 (3), Autosomal recessive
NAT8	2	73850820	2:73850820	2_73850820_C_G_b37	rs6711001	7.3e-10	0.47	Artery - Tibial
ALMS1P	2	73850820	2:73850820	2_73850820_C_G_b37	rs6711001	3.7e-10	0.63	Esophagus - Gastroesophageal Junction
NAT8	2	73850820	2:73850820	2_73850820_C_G_b37	rs6711001	2.6e-10	0.84	Brain - Cerebellum
ALMS1P	2	73850820	2:73850820	2_73850820_C_G_b37	rs6711001	1.4e-10	0.5	Adipose - Visceral (Omentum)
ALMS1P	2	73850820	2:73850820	2_73850820_C_G_b37	rs6711001	1.3e-10	0.67	Prostate
NAT8	2	73850820	2:73850820	2_73850820_C_G_b37	rs6711001	9.3e-11	0.67	Pancreas
ALMS1P	2	73850820	2:73850820	2_73850820_C_G_b37	rs6711001	7e-11	0.58	Heart - Atrial Appendage
ALMS1P	2	73850820	2:73850820	2_73850820_C_G_b37	rs6711001	6.5e-11	0.6	Colon - Transverse
ALMS1P	2	73850820	2:73850820	2_73850820_C_G_b37	rs6711001	1.7e-11	0.79	Small Intestine - Terminal Ileum
ALMS1P	2	73850820	2:73850820	2_73850820_C_G_b37	rs6711001	5.1e-12	0.66	Colon - Sigmoid
ALMS1P	2	73850820	2:73850820	2_73850820_C_G_b37	rs6711001	3.2e-12	0.57	Esophagus - Mucosa
ALMS1P	2	73850820	2:73850820	2_73850820_C_G_b37	rs6711001	7.7e-13	0.7	Stomach
NAT8	2	73850820	2:73850820	2_73850820_C_G_b37	rs6711001	5.8e-13	0.54	Skin - Sun Exposed (Lower leg)
ALMS1P	2	73850820	2:73850820	2_73850820_C_G_b37	rs6711001	3e-13	0.84	Brain - Cerebellar Hemisphere
NAT8	2	73850820	2:73850820	2_73850820_C_G_b37	rs6711001	2.6e-14	0.63	Adipose - Subcutaneous
ALMS1P	2	73850820	2:73850820	2_73850820_C_G_b37	rs6711001	1.9e-14	0.9	Brain - Cerebellum
ALMS1P	2	73850820	2:73850820	2_73850820_C_G_b37	rs6711001	3.8e-16	0.6	Adipose - Subcutaneous
ALMS1P	2	73850820	2:73850820	2_73850820_C_G_b37	rs6711001	3.6e-16	0.53	Muscle - Skeletal
ALMS1P	2	73850820	2:73850820	2_73850820_C_G_b37	rs6711001	2.7e-16	0.76	Pancreas
ALMS1P	2	73850820	2:73850820	2_73850820_C_G_b37	rs6711001	1.4e-16	0.64	Esophagus - Muscularis
ALMS1P	2	73850820	2:73850820	2_73850820_C_G_b37	rs6711001	7.5e-17	0.53	Artery - Tibial
NAT8	2	73850820	2:73850820	2_73850820_C_G_b37	rs6711001	3.6e-17	0.63	Thyroid
ALMS1P	2	73850820	2:73850820	2_73850820_C_G_b37	rs6711001	1.3e-18	0.64	Skin - Sun Exposed (Lower leg)
ALMS1P	2	73850820	2:73850820	2_73850820_C_G_b37	rs6711001	7.7e-19	0.81	Testis
ALMS1P	2	73850820	2:73850820	2_73850820_C_G_b37	rs6711001	6.9e-20	0.73	Skin - Not Sun Exposed (Suprapubic)
ALMS1P	2	73850820	2:73850820	2_73850820_C_G_b37	rs6711001	1.2e-23	1	Pituitary
ALMS1P	2	73850820	2:73850820	2_73850820_C_G_b37	rs6711001	7.6e-29	0.76	Nerve - Tibial
ALMS1P	2	73850820	2:73850820	2_73850820_C_G_b37	rs6711001	5e-36	0.82	Thyroid
MCM6	2	135722143	2:135722143	2_135722143_A_C_b37	rs1592	9.2e-05	0.14	Thyroid	Lactase persistence/nonpersistence, 223100 (3), Autosomal dominant
CCNT2	2	135722143	2:135722143	2_135722143_A_C_b37	rs1592	8.7e-05	0.12	Esophagus - Mucosa
CCNT2	2	135722143	2:135722143	2_135722143_A_C_b37	rs1592	3.8e-07	0.19	Testis
TMEM163	2	135722143	2:135722143	2_135722143_A_C_b37	rs1592	2.9e-07	-0.27	Pituitary
CCNT2	2	135722143	2:135722143	2_135722143_A_C_b37	rs1592	1.9e-07	0.27	Pituitary
CCNT2	2	135722143	2:135722143	2_135722143_A_C_b37	rs1592	1.8e-07	0.19	Artery - Aorta
AC016725.4	2	135722143	2:135722143	2_135722143_A_C_b37	rs1592	1.6e-07	0.25	Testis
CCNT2	2	135722143	2:135722143	2_135722143_A_C_b37	rs1592	1.3e-07	0.13	Artery - Tibial
CCNT2	2	135722143	2:135722143	2_135722143_A_C_b37	rs1592	1.1e-07	0.16	Esophagus - Muscularis
CCNT2	2	135722143	2:135722143	2_135722143_A_C_b37	rs1592	5.1e-08	0.15	Skin - Not Sun Exposed (Suprapubic)
CCNT2	2	135722143	2:135722143	2_135722143_A_C_b37	rs1592	5.3e-09	0.16	Lung
TMEM163	2	135722143	2:135722143	2_135722143_A_C_b37	rs1592	6.2e-10	-0.41	Esophagus - Muscularis
CCNT2	2	135722143	2:135722143	2_135722143_A_C_b37	rs1592	4e-10	0.16	Thyroid
TMEM163	2	135722143	2:135722143	2_135722143_A_C_b37	rs1592	3.9e-12	0.39	Testis
CCNT2	2	135722143	2:135722143	2_135722143_A_C_b37	rs1592	7.3e-13	0.19	Nerve - Tibial
HIBCH	2	191163706	2:191163706	2_191163706_A_G_b37	rs2664260	6.4e-07	0.56	Brain - Substantia nigra	3-hydroxyisobutryl-CoA hydrolase deficiency, 250620 (3), Autosomal recessive
HIBCH	2	191163706	2:191163706	2_191163706_A_G_b37	rs2664260	5.6e-07	0.25	Esophagus - Gastroesophageal Junction	3-hydroxyisobutryl-CoA hydrolase deficiency, 250620 (3), Autosomal recessive
HIBCH	2	191163706	2:191163706	2_191163706_A_G_b37	rs2664260	5.6e-07	0.4	Minor Salivary Gland	3-hydroxyisobutryl-CoA hydrolase deficiency, 250620 (3), Autosomal recessive
INPP1	2	191163706	2:191163706	2_191163706_A_G_b37	rs2664260	4.1e-07	-0.36	Brain - Caudate (basal ganglia)
HIBCH	2	191163706	2:191163706	2_191163706_A_G_b37	rs2664260	3e-07	0.38	Spleen	3-hydroxyisobutryl-CoA hydrolase deficiency, 250620 (3), Autosomal recessive
HIBCH	2	191163706	2:191163706	2_191163706_A_G_b37	rs2664260	2.1e-07	0.48	Prostate	3-hydroxyisobutryl-CoA hydrolase deficiency, 250620 (3), Autosomal recessive
HIBCH	2	191163706	2:191163706	2_191163706_A_G_b37	rs2664260	7.9e-08	0.31	Colon - Sigmoid	3-hydroxyisobutryl-CoA hydrolase deficiency, 250620 (3), Autosomal recessive
INPP1	2	191163706	2:191163706	2_191163706_A_G_b37	rs2664260	1.8e-08	-0.51	Brain - Cerebellum
INPP1	2	191163706	2:191163706	2_191163706_A_G_b37	rs2664260	5.3e-09	-0.52	Brain - Cerebellar Hemisphere
C2orf88	2	191163706	2:191163706	2_191163706_A_G_b37	rs2664260	5.2e-09	0.24	Thyroid
HIBCH	2	191163706	2:191163706	2_191163706_A_G_b37	rs2664260	1.2e-09	0.52	Brain - Hippocampus	3-hydroxyisobutryl-CoA hydrolase deficiency, 250620 (3), Autosomal recessive
INPP1	2	191163706	2:191163706	2_191163706_A_G_b37	rs2664260	7.4e-10	-0.3	Nerve - Tibial
HIBCH	2	191163706	2:191163706	2_191163706_A_G_b37	rs2664260	6.9e-10	0.56	Brain - Hypothalamus	3-hydroxyisobutryl-CoA hydrolase deficiency, 250620 (3), Autosomal recessive
HIBCH	2	191163706	2:191163706	2_191163706_A_G_b37	rs2664260	5.2e-10	0.19	Artery - Tibial	3-hydroxyisobutryl-CoA hydrolase deficiency, 250620 (3), Autosomal recessive
HIBCH	2	191163706	2:191163706	2_191163706_A_G_b37	rs2664260	3.8e-10	0.61	Brain - Amygdala	3-hydroxyisobutryl-CoA hydrolase deficiency, 250620 (3), Autosomal recessive
HIBCH	2	191163706	2:191163706	2_191163706_A_G_b37	rs2664260	1.5e-10	0.27	Breast - Mammary Tissue	3-hydroxyisobutryl-CoA hydrolase deficiency, 250620 (3), Autosomal recessive
TMEM194B	2	191163706	2:191163706	2_191163706_A_G_b37	rs2664260	8.8e-11	-0.43	Testis
HIBCH	2	191163706	2:191163706	2_191163706_A_G_b37	rs2664260	8e-11	0.41	Brain - Anterior cingulate cortex (BA24)	3-hydroxyisobutryl-CoA hydrolase deficiency, 250620 (3), Autosomal recessive
HIBCH	2	191163706	2:191163706	2_191163706_A_G_b37	rs2664260	5.4e-11	0.23	Cells - Transformed fibroblasts	3-hydroxyisobutryl-CoA hydrolase deficiency, 250620 (3), Autosomal recessive
HIBCH	2	191163706	2:191163706	2_191163706_A_G_b37	rs2664260	2.3e-11	0.27	Whole Blood	3-hydroxyisobutryl-CoA hydrolase deficiency, 250620 (3), Autosomal recessive
HIBCH	2	191163706	2:191163706	2_191163706_A_G_b37	rs2664260	7e-12	0.46	Brain - Nucleus accumbens (basal ganglia)	3-hydroxyisobutryl-CoA hydrolase deficiency, 250620 (3), Autosomal recessive
HIBCH	2	191163706	2:191163706	2_191163706_A_G_b37	rs2664260	3.8e-12	0.43	Brain - Frontal Cortex (BA9)	3-hydroxyisobutryl-CoA hydrolase deficiency, 250620 (3), Autosomal recessive
HIBCH	2	191163706	2:191163706	2_191163706_A_G_b37	rs2664260	1.4e-12	0.39	Pancreas	3-hydroxyisobutryl-CoA hydrolase deficiency, 250620 (3), Autosomal recessive
HIBCH	2	191163706	2:191163706	2_191163706_A_G_b37	rs2664260	1.1e-12	0.46	Pituitary	3-hydroxyisobutryl-CoA hydrolase deficiency, 250620 (3), Autosomal recessive
HIBCH	2	191163706	2:191163706	2_191163706_A_G_b37	rs2664260	8.6e-13	0.22	Adipose - Subcutaneous	3-hydroxyisobutryl-CoA hydrolase deficiency, 250620 (3), Autosomal recessive
HIBCH	2	191163706	2:191163706	2_191163706_A_G_b37	rs2664260	4.4e-14	0.3	Adipose - Visceral (Omentum)	3-hydroxyisobutryl-CoA hydrolase deficiency, 250620 (3), Autosomal recessive
HIBCH	2	191163706	2:191163706	2_191163706_A_G_b37	rs2664260	9.9e-15	0.49	Testis	3-hydroxyisobutryl-CoA hydrolase deficiency, 250620 (3), Autosomal recessive
C2orf88	2	191163706	2:191163706	2_191163706_A_G_b37	rs2664260	7.8e-15	-0.47	Cells - Transformed fibroblasts
HIBCH	2	191163706	2:191163706	2_191163706_A_G_b37	rs2664260	3.5e-15	0.3	Skin - Not Sun Exposed (Suprapubic)	3-hydroxyisobutryl-CoA hydrolase deficiency, 250620 (3), Autosomal recessive
HIBCH	2	191163706	2:191163706	2_191163706_A_G_b37	rs2664260	1.9e-15	0.49	Brain - Putamen (basal ganglia)	3-hydroxyisobutryl-CoA hydrolase deficiency, 250620 (3), Autosomal recessive
HIBCH	2	191163706	2:191163706	2_191163706_A_G_b37	rs2664260	1.6e-15	0.4	Brain - Caudate (basal ganglia)	3-hydroxyisobutryl-CoA hydrolase deficiency, 250620 (3), Autosomal recessive
HIBCH	2	191163706	2:191163706	2_191163706_A_G_b37	rs2664260	3.4e-16	0.53	Brain - Cortex	3-hydroxyisobutryl-CoA hydrolase deficiency, 250620 (3), Autosomal recessive
HIBCH	2	191163706	2:191163706	2_191163706_A_G_b37	rs2664260	4.7e-19	0.66	Adrenal Gland	3-hydroxyisobutryl-CoA hydrolase deficiency, 250620 (3), Autosomal recessive
HIBCH	2	191163706	2:191163706	2_191163706_A_G_b37	rs2664260	1.4e-19	0.32	Esophagus - Muscularis	3-hydroxyisobutryl-CoA hydrolase deficiency, 250620 (3), Autosomal recessive
HIBCH	2	191163706	2:191163706	2_191163706_A_G_b37	rs2664260	3.6e-20	0.36	Esophagus - Mucosa	3-hydroxyisobutryl-CoA hydrolase deficiency, 250620 (3), Autosomal recessive
HIBCH	2	191163706	2:191163706	2_191163706_A_G_b37	rs2664260	7.7e-21	0.59	Liver	3-hydroxyisobutryl-CoA hydrolase deficiency, 250620 (3), Autosomal recessive
HIBCH	2	191163706	2:191163706	2_191163706_A_G_b37	rs2664260	1.7e-23	0.32	Skin - Sun Exposed (Lower leg)	3-hydroxyisobutryl-CoA hydrolase deficiency, 250620 (3), Autosomal recessive
HIBCH	2	191163706	2:191163706	2_191163706_A_G_b37	rs2664260	9.4e-26	0.47	Heart - Atrial Appendage	3-hydroxyisobutryl-CoA hydrolase deficiency, 250620 (3), Autosomal recessive
HIBCH	2	191163706	2:191163706	2_191163706_A_G_b37	rs2664260	3.8e-28	0.38	Colon - Transverse	3-hydroxyisobutryl-CoA hydrolase deficiency, 250620 (3), Autosomal recessive
HIBCH	2	191163706	2:191163706	2_191163706_A_G_b37	rs2664260	1.4e-28	0.59	Stomach	3-hydroxyisobutryl-CoA hydrolase deficiency, 250620 (3), Autosomal recessive
HIBCH	2	191163706	2:191163706	2_191163706_A_G_b37	rs2664260	3.8e-29	0.43	Heart - Left Ventricle	3-hydroxyisobutryl-CoA hydrolase deficiency, 250620 (3), Autosomal recessive
HIBCH	2	191163706	2:191163706	2_191163706_A_G_b37	rs2664260	5.9e-30	0.43	Lung	3-hydroxyisobutryl-CoA hydrolase deficiency, 250620 (3), Autosomal recessive
HIBCH	2	191163706	2:191163706	2_191163706_A_G_b37	rs2664260	6.7e-44	0.51	Thyroid	3-hydroxyisobutryl-CoA hydrolase deficiency, 250620 (3), Autosomal recessive
HIBCH	2	191163706	2:191163706	2_191163706_A_G_b37	rs2664260	4e-65	0.41	Muscle - Skeletal	3-hydroxyisobutryl-CoA hydrolase deficiency, 250620 (3), Autosomal recessive
HIBCH	2	191197226	2:191197226	2_191197226_G_T_b37	rs291428	7e-07	0.26	Esophagus - Gastroesophageal Junction	3-hydroxyisobutryl-CoA hydrolase deficiency, 250620 (3), Autosomal recessive
HIBCH	2	191197226	2:191197226	2_191197226_G_T_b37	rs291428	6.4e-07	0.56	Brain - Substantia nigra	3-hydroxyisobutryl-CoA hydrolase deficiency, 250620 (3), Autosomal recessive
HIBCH	2	191197226	2:191197226	2_191197226_G_T_b37	rs291428	5.6e-07	0.4	Minor Salivary Gland	3-hydroxyisobutryl-CoA hydrolase deficiency, 250620 (3), Autosomal recessive
HIBCH	2	191197226	2:191197226	2_191197226_G_T_b37	rs291428	3e-07	0.4	Small Intestine - Terminal Ileum	3-hydroxyisobutryl-CoA hydrolase deficiency, 250620 (3), Autosomal recessive
INPP1	2	191197226	2:191197226	2_191197226_G_T_b37	rs291428	1.4e-07	-0.37	Brain - Caudate (basal ganglia)
HIBCH	2	191197226	2:191197226	2_191197226_G_T_b37	rs291428	9.4e-08	0.49	Prostate	3-hydroxyisobutryl-CoA hydrolase deficiency, 250620 (3), Autosomal recessive
C2orf88	2	191197226	2:191197226	2_191197226_G_T_b37	rs291428	3.4e-08	0.23	Thyroid
HIBCH	2	191197226	2:191197226	2_191197226_G_T_b37	rs291428	2.9e-08	0.41	Spleen	3-hydroxyisobutryl-CoA hydrolase deficiency, 250620 (3), Autosomal recessive
INPP1	2	191197226	2:191197226	2_191197226_G_T_b37	rs291428	2.4e-09	-0.54	Brain - Cerebellar Hemisphere
HIBCH	2	191197226	2:191197226	2_191197226_G_T_b37	rs291428	2.2e-09	0.36	Colon - Sigmoid	3-hydroxyisobutryl-CoA hydrolase deficiency, 250620 (3), Autosomal recessive
INPP1	2	191197226	2:191197226	2_191197226_G_T_b37	rs291428	1e-09	-0.56	Brain - Cerebellum
HIBCH	2	191197226	2:191197226	2_191197226_G_T_b37	rs291428	2.3e-10	0.55	Brain - Hypothalamus	3-hydroxyisobutryl-CoA hydrolase deficiency, 250620 (3), Autosomal recessive
HIBCH	2	191197226	2:191197226	2_191197226_G_T_b37	rs291428	2e-10	0.19	Artery - Tibial	3-hydroxyisobutryl-CoA hydrolase deficiency, 250620 (3), Autosomal recessive
HIBCH	2	191197226	2:191197226	2_191197226_G_T_b37	rs291428	1.1e-10	0.63	Brain - Amygdala	3-hydroxyisobutryl-CoA hydrolase deficiency, 250620 (3), Autosomal recessive
TMEM194B	2	191197226	2:191197226	2_191197226_G_T_b37	rs291428	9.7e-11	-0.43	Testis
INPP1	2	191197226	2:191197226	2_191197226_G_T_b37	rs291428	4.4e-11	-0.32	Nerve - Tibial
HIBCH	2	191197226	2:191197226	2_191197226_G_T_b37	rs291428	3.4e-11	0.55	Brain - Hippocampus	3-hydroxyisobutryl-CoA hydrolase deficiency, 250620 (3), Autosomal recessive
HIBCH	2	191197226	2:191197226	2_191197226_G_T_b37	rs291428	2.3e-11	0.41	Brain - Frontal Cortex (BA9)	3-hydroxyisobutryl-CoA hydrolase deficiency, 250620 (3), Autosomal recessive
HIBCH	2	191197226	2:191197226	2_191197226_G_T_b37	rs291428	9e-12	0.3	Breast - Mammary Tissue	3-hydroxyisobutryl-CoA hydrolase deficiency, 250620 (3), Autosomal recessive
HIBCH	2	191197226	2:191197226	2_191197226_G_T_b37	rs291428	7.7e-12	0.28	Whole Blood	3-hydroxyisobutryl-CoA hydrolase deficiency, 250620 (3), Autosomal recessive
HIBCH	2	191197226	2:191197226	2_191197226_G_T_b37	rs291428	3.1e-12	0.24	Cells - Transformed fibroblasts	3-hydroxyisobutryl-CoA hydrolase deficiency, 250620 (3), Autosomal recessive
HIBCH	2	191197226	2:191197226	2_191197226_G_T_b37	rs291428	4e-13	0.44	Brain - Anterior cingulate cortex (BA24)	3-hydroxyisobutryl-CoA hydrolase deficiency, 250620 (3), Autosomal recessive
HIBCH	2	191197226	2:191197226	2_191197226_G_T_b37	rs291428	1.9e-13	0.48	Brain - Nucleus accumbens (basal ganglia)	3-hydroxyisobutryl-CoA hydrolase deficiency, 250620 (3), Autosomal recessive
HIBCH	2	191197226	2:191197226	2_191197226_G_T_b37	rs291428	3.5e-14	0.41	Pancreas	3-hydroxyisobutryl-CoA hydrolase deficiency, 250620 (3), Autosomal recessive
HIBCH	2	191197226	2:191197226	2_191197226_G_T_b37	rs291428	2.7e-14	0.48	Pituitary	3-hydroxyisobutryl-CoA hydrolase deficiency, 250620 (3), Autosomal recessive
HIBCH	2	191197226	2:191197226	2_191197226_G_T_b37	rs291428	2.2e-14	0.23	Adipose - Subcutaneous	3-hydroxyisobutryl-CoA hydrolase deficiency, 250620 (3), Autosomal recessive
HIBCH	2	191197226	2:191197226	2_191197226_G_T_b37	rs291428	1.3e-15	0.31	Skin - Not Sun Exposed (Suprapubic)	3-hydroxyisobutryl-CoA hydrolase deficiency, 250620 (3), Autosomal recessive
C2orf88	2	191197226	2:191197226	2_191197226_G_T_b37	rs291428	1.3e-15	-0.48	Cells - Transformed fibroblasts
HIBCH	2	191197226	2:191197226	2_191197226_G_T_b37	rs291428	4.3e-16	0.51	Testis	3-hydroxyisobutryl-CoA hydrolase deficiency, 250620 (3), Autosomal recessive
HIBCH	2	191197226	2:191197226	2_191197226_G_T_b37	rs291428	2.4e-16	0.33	Adipose - Visceral (Omentum)	3-hydroxyisobutryl-CoA hydrolase deficiency, 250620 (3), Autosomal recessive
HIBCH	2	191197226	2:191197226	2_191197226_G_T_b37	rs291428	1.2e-16	0.41	Brain - Caudate (basal ganglia)	3-hydroxyisobutryl-CoA hydrolase deficiency, 250620 (3), Autosomal recessive
HIBCH	2	191197226	2:191197226	2_191197226_G_T_b37	rs291428	6.1e-17	0.55	Brain - Cortex	3-hydroxyisobutryl-CoA hydrolase deficiency, 250620 (3), Autosomal recessive
HIBCH	2	191197226	2:191197226	2_191197226_G_T_b37	rs291428	3.5e-17	0.51	Brain - Putamen (basal ganglia)	3-hydroxyisobutryl-CoA hydrolase deficiency, 250620 (3), Autosomal recessive
HIBCH	2	191197226	2:191197226	2_191197226_G_T_b37	rs291428	4.5e-21	0.6	Liver	3-hydroxyisobutryl-CoA hydrolase deficiency, 250620 (3), Autosomal recessive
HIBCH	2	191197226	2:191197226	2_191197226_G_T_b37	rs291428	3.7e-22	0.34	Esophagus - Muscularis	3-hydroxyisobutryl-CoA hydrolase deficiency, 250620 (3), Autosomal recessive
HIBCH	2	191197226	2:191197226	2_191197226_G_T_b37	rs291428	1.5e-22	0.72	Adrenal Gland	3-hydroxyisobutryl-CoA hydrolase deficiency, 250620 (3), Autosomal recessive
HIBCH	2	191197226	2:191197226	2_191197226_G_T_b37	rs291428	1.1e-23	0.39	Esophagus - Mucosa	3-hydroxyisobutryl-CoA hydrolase deficiency, 250620 (3), Autosomal recessive
HIBCH	2	191197226	2:191197226	2_191197226_G_T_b37	rs291428	9.6e-26	0.33	Skin - Sun Exposed (Lower leg)	3-hydroxyisobutryl-CoA hydrolase deficiency, 250620 (3), Autosomal recessive
HIBCH	2	191197226	2:191197226	2_191197226_G_T_b37	rs291428	5.9e-29	0.59	Stomach	3-hydroxyisobutryl-CoA hydrolase deficiency, 250620 (3), Autosomal recessive
HIBCH	2	191197226	2:191197226	2_191197226_G_T_b37	rs291428	2.3e-29	0.5	Heart - Atrial Appendage	3-hydroxyisobutryl-CoA hydrolase deficiency, 250620 (3), Autosomal recessive
HIBCH	2	191197226	2:191197226	2_191197226_G_T_b37	rs291428	4.9e-32	0.44	Lung	3-hydroxyisobutryl-CoA hydrolase deficiency, 250620 (3), Autosomal recessive
HIBCH	2	191197226	2:191197226	2_191197226_G_T_b37	rs291428	1.1e-32	0.42	Colon - Transverse	3-hydroxyisobutryl-CoA hydrolase deficiency, 250620 (3), Autosomal recessive
HIBCH	2	191197226	2:191197226	2_191197226_G_T_b37	rs291428	5.8e-33	0.45	Heart - Left Ventricle	3-hydroxyisobutryl-CoA hydrolase deficiency, 250620 (3), Autosomal recessive
HIBCH	2	191197226	2:191197226	2_191197226_G_T_b37	rs291428	7.4e-49	0.53	Thyroid	3-hydroxyisobutryl-CoA hydrolase deficiency, 250620 (3), Autosomal recessive
HIBCH	2	191197226	2:191197226	2_191197226_G_T_b37	rs291428	2.2e-69	0.43	Muscle - Skeletal	3-hydroxyisobutryl-CoA hydrolase deficiency, 250620 (3), Autosomal recessive
PECR	2	216900528	2:216900528	2_216900528_C_G_b37	rs10178909	1e-07	0.31	Liver
UGT1A1	2	234619422	2:234619422	2_234619422_G_T_b37	rs28898590	5.5e-07	0.41	Colon - Transverse	Bilirubin, serum level of, QTL1, 601816 (3); Crigler-Najjar syndrome, type I, 218800 (3), Autosomal recessive; Crigler-Najjar syndrome, type II, 606785 (3), Autosomal recessive; Gilbert syndrome, 143500 (3), Autosomal recessive; Hyperbilirubinemia, familial transient neonatal, 237900 (3), Autosomal recessive
MROH2A	2	234619422	2:234619422	2_234619422_G_T_b37	rs28898590	1.6e-11	0.78	Stomach
RPL17P11	2	234626287	2:234626287	2_234626287_G_A_b37	rs869283	7.7e-12	0.65	Liver
UGT1A6	2	234664586	2:234664586	2_234664586_ATC_A_b37	rs369933497	7.8e-11	-0.33	Esophagus - Mucosa
RPL17P11	2	234664586	2:234664586	2_234664586_ATC_A_b37	rs369933497	3.8e-11	0.67	Liver
MROH2A	2	234668290	2:234668290	2_234668290_C_A_b37	rs34916116	1.1e-11	0.8	Stomach
UGT1A6	2	234668570	2:234668570	2_234668570_C_T_b37	rs887829	7.8e-11	-0.33	Esophagus - Mucosa
RPL17P11	2	234668570	2:234668570	2_234668570_C_T_b37	rs887829	3.8e-11	0.67	Liver
RPL17P11	2	234668879	2:234668879	2_234668879_C_CAT_b37	rs606231201	3.4e-08	0.68	Liver
UGT1A6	2	234668879	2:234668879	2_234668879_C_CAT_b37	rs606231201	4.9e-10	-0.37	Esophagus - Mucosa
UGT1A6	2	234673309	2:234673309	2_234673309_C_T_b37	rs4148325	7.8e-11	-0.33	Esophagus - Mucosa
RPL17P11	2	234673309	2:234673309	2_234673309_C_T_b37	rs4148325	3.8e-11	0.67	Liver
AGXT	2	241827696	2:241827696	2_241827696_A_G_b37	rs4675869	5.6e-07	0.29	Colon - Transverse	Hyperoxaluria, primary, type 1, 259900 (3), Autosomal recessive
C2orf54	2	241827696	2:241827696	2_241827696_A_G_b37	rs4675869	3.3e-08	0.21	Lung
C2orf54	2	241827696	2:241827696	2_241827696_A_G_b37	rs4675869	1.2e-08	0.29	Colon - Transverse
C2orf54	2	241827696	2:241827696	2_241827696_A_G_b37	rs4675869	4.6e-09	0.56	Pancreas
C2orf54	2	241827696	2:241827696	2_241827696_A_G_b37	rs4675869	4.2e-09	-0.2	Skin - Sun Exposed (Lower leg)
C2orf54	2	241827696	2:241827696	2_241827696_A_G_b37	rs4675869	1.7e-09	-0.24	Skin - Not Sun Exposed (Suprapubic)
C2orf54	2	241827696	2:241827696	2_241827696_A_G_b37	rs4675869	9.1e-10	0.56	Liver
C2orf54	2	241827696	2:241827696	2_241827696_A_G_b37	rs4675869	5.8e-11	0.35	Stomach
C2orf54	2	241827696	2:241827696	2_241827696_A_G_b37	rs4675869	3.1e-20	-0.27	Esophagus - Mucosa
LIMD1	3	45765132	3:45765132	3_45765132_T_G_b37	rs73058498	9.2e-07	0.49	Adipose - Subcutaneous
LIMD1	3	45765132	3:45765132	3_45765132_T_G_b37	rs73058498	7.2e-07	0.45	Colon - Transverse
LIMD1	3	45765132	3:45765132	3_45765132_T_G_b37	rs73058498	6.9e-07	0.38	Artery - Tibial
LIMD1	3	45765132	3:45765132	3_45765132_T_G_b37	rs73058498	5.5e-07	0.47	Skin - Sun Exposed (Lower leg)
LIMD1	3	45765132	3:45765132	3_45765132_T_G_b37	rs73058498	2.7e-08	0.66	Esophagus - Gastroesophageal Junction
LIMD1	3	45765132	3:45765132	3_45765132_T_G_b37	rs73058498	2.5e-08	0.64	Artery - Aorta
LIMD1	3	45765132	3:45765132	3_45765132_T_G_b37	rs73058498	2.9e-10	0.64	Nerve - Tibial
LIMD1	3	45814094	3:45814094	3_45814094_G_A_b37	rs17279437	6.2e-07	0.46	Colon - Transverse
LIMD1	3	45814094	3:45814094	3_45814094_G_A_b37	rs17279437	1.7e-07	0.62	Artery - Aorta
LIMD1	3	45814094	3:45814094	3_45814094_G_A_b37	rs17279437	3.3e-08	0.41	Artery - Tibial
LIMD1	3	45814094	3:45814094	3_45814094_G_A_b37	rs17279437	3.1e-08	0.67	Esophagus - Gastroesophageal Junction
LIMD1	3	45814094	3:45814094	3_45814094_G_A_b37	rs17279437	1.2e-11	0.65	Nerve - Tibial
TKT	3	53282188	3:53282188	3_53282188_T_C_b37	rs4687717	1.1e-08	0.15	Esophagus - Mucosa	Short stature, developmental delay, and congenital heart defects, 617044 (3), Autosomal recessive
SUCLG2	3	67425963	3:67425963	3_67425963_G_T_b37	rs115560420	1.5e-07	-0.32	Adipose - Subcutaneous
TMEM45A	3	100211294	3:100211294	3_100211294_A_G_b37	rs7616839	0.00012	-0.13	Muscle - Skeletal
TMEM45A	3	100211294	3:100211294	3_100211294_A_G_b37	rs7616839	0.00012	-0.12	Nerve - Tibial
NIT2	3	100211294	3:100211294	3_100211294_A_G_b37	rs7616839	9.6e-05	0.13	Skin - Sun Exposed (Lower leg)
TMEM45A	3	100211294	3:100211294	3_100211294_A_G_b37	rs7616839	5.9e-05	0.17	Esophagus - Mucosa
TOMM70A	3	100211294	3:100211294	3_100211294_A_G_b37	rs7616839	5.7e-05	-0.11	Adipose - Visceral (Omentum)
NIT2	3	100211294	3:100211294	3_100211294_A_G_b37	rs7616839	3.2e-07	0.19	Testis
TMEM45A	3	100211294	3:100211294	3_100211294_A_G_b37	rs7616839	8.7e-08	-0.22	Artery - Aorta
NIT2	3	100211294	3:100211294	3_100211294_A_G_b37	rs7616839	7.4e-09	0.44	Brain - Cortex
TMEM45A	3	100211294	3:100211294	3_100211294_A_G_b37	rs7616839	1.5e-15	0.38	Pituitary
TMEM45A	3	100211294	3:100211294	3_100211294_A_G_b37	rs7616839	2.3e-16	0.46	Whole Blood
TMEM45A	3	100211294	3:100211294	3_100211294_A_G_b37	rs7616839	7.7e-17	-0.28	Artery - Tibial
TMEM45A	3	100211294	3:100211294	3_100211294_A_G_b37	rs7616839	1.7e-33	0.67	Pancreas
RP11-71H17.9	3	124456742	3:124456742	3_124456742_G_C_b37	rs1801019	9e-07	0.61	Prostate
RP11-71H17.9	3	124456742	3:124456742	3_124456742_G_C_b37	rs1801019	6.7e-07	0.77	Brain - Anterior cingulate cortex (BA24)
RP11-71H17.9	3	124456742	3:124456742	3_124456742_G_C_b37	rs1801019	6.4e-07	0.58	Pituitary
RP11-71H17.9	3	124456742	3:124456742	3_124456742_G_C_b37	rs1801019	5.2e-07	0.64	Brain - Hippocampus
UMPS	3	124456742	3:124456742	3_124456742_G_C_b37	rs1801019	3.4e-07	-0.18	Skin - Sun Exposed (Lower leg)	Orotic aciduria, 258900 (3), Autosomal recessive
RP11-71H17.9	3	124456742	3:124456742	3_124456742_G_C_b37	rs1801019	3.1e-08	0.71	Small Intestine - Terminal Ileum
RP11-71H17.9	3	124456742	3:124456742	3_124456742_G_C_b37	rs1801019	1.9e-08	0.74	Brain - Cortex
RP11-71H17.9	3	124456742	3:124456742	3_124456742_G_C_b37	rs1801019	1.1e-08	0.61	Adrenal Gland
UMPS	3	124456742	3:124456742	3_124456742_G_C_b37	rs1801019	9.4e-09	-0.16	Esophagus - Mucosa	Orotic aciduria, 258900 (3), Autosomal recessive
RP11-71H17.9	3	124456742	3:124456742	3_124456742_G_C_b37	rs1801019	6.8e-09	0.5	Breast - Mammary Tissue
ITGB5	3	124456742	3:124456742	3_124456742_G_C_b37	rs1801019	7.7e-10	0.31	Esophagus - Mucosa
RP11-71H17.9	3	124456742	3:124456742	3_124456742_G_C_b37	rs1801019	6.1e-10	-0.44	Esophagus - Mucosa
RP11-71H17.9	3	124456742	3:124456742	3_124456742_G_C_b37	rs1801019	4.1e-10	0.7	Pancreas
RP11-71H17.9	3	124456742	3:124456742	3_124456742_G_C_b37	rs1801019	5.7e-11	0.74	Colon - Sigmoid
RP11-71H17.9	3	124456742	3:124456742	3_124456742_G_C_b37	rs1801019	1.4e-11	0.56	Artery - Aorta
RP11-71H17.9	3	124456742	3:124456742	3_124456742_G_C_b37	rs1801019	8e-12	0.61	Stomach
RP11-71H17.9	3	124456742	3:124456742	3_124456742_G_C_b37	rs1801019	2.5e-12	0.65	Heart - Atrial Appendage
RP11-71H17.9	3	124456742	3:124456742	3_124456742_G_C_b37	rs1801019	7.5e-13	0.75	Esophagus - Gastroesophageal Junction
RP11-71H17.9	3	124456742	3:124456742	3_124456742_G_C_b37	rs1801019	3.9e-13	0.73	Heart - Left Ventricle
RP11-71H17.9	3	124456742	3:124456742	3_124456742_G_C_b37	rs1801019	3.6e-13	0.64	Artery - Tibial
RP11-71H17.9	3	124456742	3:124456742	3_124456742_G_C_b37	rs1801019	3.6e-15	0.71	Nerve - Tibial
RP11-71H17.9	3	124456742	3:124456742	3_124456742_G_C_b37	rs1801019	2.7e-16	0.67	Adipose - Subcutaneous
RP11-71H17.9	3	124456742	3:124456742	3_124456742_G_C_b37	rs1801019	1.9e-16	0.58	Adipose - Visceral (Omentum)
RP11-71H17.9	3	124456742	3:124456742	3_124456742_G_C_b37	rs1801019	2e-17	0.62	Muscle - Skeletal
RP11-71H17.9	3	124456742	3:124456742	3_124456742_G_C_b37	rs1801019	1.7e-17	0.57	Lung
RP11-71H17.9	3	124456742	3:124456742	3_124456742_G_C_b37	rs1801019	8.7e-18	1.3	Cells - EBV-transformed lymphocytes
RP11-71H17.9	3	124456742	3:124456742	3_124456742_G_C_b37	rs1801019	7.7e-18	0.63	Colon - Transverse
RP11-71H17.9	3	124456742	3:124456742	3_124456742_G_C_b37	rs1801019	5.5e-19	0.67	Thyroid
RP11-71H17.9	3	124456742	3:124456742	3_124456742_G_C_b37	rs1801019	7.3e-22	0.81	Esophagus - Muscularis
RP11-71H17.9	3	124456742	3:124456742	3_124456742_G_C_b37	rs1801019	2.6e-30	0.78	Cells - Transformed fibroblasts
NPHP3	3	132396607	3:132396607	3_132396607_C_A_b37	rs73000598	4.7e-08	-0.58	Lung	Meckel syndrome 7, 267010 (3), Autosomal recessive; Nephronophthisis 3, 604387 (3), Autosomal recessive; Renal-hepatic-pancreatic dysplasia 1, 208540 (3), Autosomal recessive
PCOLCE2	3	142663950	3:142663950	3_142663950_G_A_b37	rs4683714	2.1e-13	0.44	Artery - Aorta
MCCC1	3	182819049	3:182819049	3_182819049_A_G_b37	rs6443851	8e-07	0.13	Adipose - Visceral (Omentum)	3-Methylcrotonyl-CoA carboxylase 1 deficiency, 210200 (3), Autosomal recessive
MCCC1	3	182819049	3:182819049	3_182819049_A_G_b37	rs6443851	2.5e-07	0.23	Colon - Transverse	3-Methylcrotonyl-CoA carboxylase 1 deficiency, 210200 (3), Autosomal recessive
MCCC1	3	182819049	3:182819049	3_182819049_A_G_b37	rs6443851	5.5e-08	0.17	Thyroid	3-Methylcrotonyl-CoA carboxylase 1 deficiency, 210200 (3), Autosomal recessive
MCCC1	3	182819049	3:182819049	3_182819049_A_G_b37	rs6443851	2.4e-09	0.19	Stomach	3-Methylcrotonyl-CoA carboxylase 1 deficiency, 210200 (3), Autosomal recessive
MCCC1	3	182819049	3:182819049	3_182819049_A_G_b37	rs6443851	1.4e-09	0.15	Artery - Tibial	3-Methylcrotonyl-CoA carboxylase 1 deficiency, 210200 (3), Autosomal recessive
MCCC1	3	182819049	3:182819049	3_182819049_A_G_b37	rs6443851	9.1e-10	0.16	Nerve - Tibial	3-Methylcrotonyl-CoA carboxylase 1 deficiency, 210200 (3), Autosomal recessive
MCCC1	3	182819049	3:182819049	3_182819049_A_G_b37	rs6443851	3.8e-11	0.28	Testis	3-Methylcrotonyl-CoA carboxylase 1 deficiency, 210200 (3), Autosomal recessive
MCCC1	3	182819049	3:182819049	3_182819049_A_G_b37	rs6443851	3.1e-11	0.15	Adipose - Subcutaneous	3-Methylcrotonyl-CoA carboxylase 1 deficiency, 210200 (3), Autosomal recessive
MCCC1	3	182819049	3:182819049	3_182819049_A_G_b37	rs6443851	2.5e-12	0.22	Esophagus - Muscularis	3-Methylcrotonyl-CoA carboxylase 1 deficiency, 210200 (3), Autosomal recessive
MCCC1	3	182819049	3:182819049	3_182819049_A_G_b37	rs6443851	2.4e-13	0.22	Esophagus - Mucosa	3-Methylcrotonyl-CoA carboxylase 1 deficiency, 210200 (3), Autosomal recessive
MCCC1	3	182819049	3:182819049	3_182819049_A_G_b37	rs6443851	1.3e-13	0.24	Heart - Left Ventricle	3-Methylcrotonyl-CoA carboxylase 1 deficiency, 210200 (3), Autosomal recessive
MCCC1	3	182819049	3:182819049	3_182819049_A_G_b37	rs6443851	4e-14	0.24	Heart - Atrial Appendage	3-Methylcrotonyl-CoA carboxylase 1 deficiency, 210200 (3), Autosomal recessive
MCCC1	3	182819049	3:182819049	3_182819049_A_G_b37	rs6443851	8.7e-18	0.28	Cells - Transformed fibroblasts	3-Methylcrotonyl-CoA carboxylase 1 deficiency, 210200 (3), Autosomal recessive
MCCC1	3	182819049	3:182819049	3_182819049_A_G_b37	rs6443851	1.2e-38	0.42	Muscle - Skeletal	3-Methylcrotonyl-CoA carboxylase 1 deficiency, 210200 (3), Autosomal recessive
ZDHHC19	3	195942080	3:195942080	3_195942080_T_TG_b37	rs397726270	2.7e-22	-0.54	Muscle - Skeletal
ZDHHC19	3	195942487	3:195942487	3_195942487_A_G_b37	rs2342307	9.7e-25	-0.57	Muscle - Skeletal
TMPRSS11E	4	69310287	4:69310287	4_69310287_T_C_b37	rs35111362	2.6e-07	-0.14	Esophagus - Mucosa
RP11-1267H10.1	4	69310287	4:69310287	4_69310287_T_C_b37	rs35111362	2e-07	0.58	Liver
UGT2B17	4	69310287	4:69310287	4_69310287_T_C_b37	rs35111362	1.2e-13	0.85	Liver	Bone mineral density QTL 12, osteoporosis, 612560 (3)
UGT2B17	4	69340991	4:69340991	4_69340991_T_A_b37	rs4860948	1.1e-10	0.81	Liver	Bone mineral density QTL 12, osteoporosis, 612560 (3)
UGT2B17	4	69349018	4:69349018	4_69349018_A_C_b37	rs1117816	1.1e-10	0.81	Liver	Bone mineral density QTL 12, osteoporosis, 612560 (3)
RP11-10L7.1	4	89225088	4:89225088	4_89225088_C_G_b37	rs9995984	4.6e-08	0.59	Brain - Cortex
RP11-10L7.1	4	89225088	4:89225088	4_89225088_C_G_b37	rs9995984	4.3e-08	0.59	Brain - Frontal Cortex (BA9)
RP11-10L7.1	4	89225088	4:89225088	4_89225088_C_G_b37	rs9995984	5.1e-09	0.42	Nerve - Tibial
RP11-10L7.1	4	89225088	4:89225088	4_89225088_C_G_b37	rs9995984	3.6e-09	0.65	Brain - Nucleus accumbens (basal ganglia)
RP11-10L7.1	4	89225088	4:89225088	4_89225088_C_G_b37	rs9995984	1.2e-09	0.48	Heart - Atrial Appendage
RP11-10L7.1	4	89225088	4:89225088	4_89225088_C_G_b37	rs9995984	4.1e-10	0.45	Heart - Left Ventricle
HERC6	4	89243818	4:89243818	4_89243818_C_T_b37	rs10022462	1.1e-08	0.2	Esophagus - Mucosa
PDLIM5	4	95508755	4:95508755	4_95508755_C_T_b37	rs12642449	3.7e-08	0.21	Artery - Aorta
PDLIM5	4	95508755	4:95508755	4_95508755_C_T_b37	rs12642449	4.9e-09	0.21	Skin - Not Sun Exposed (Suprapubic)
PDLIM5	4	95508755	4:95508755	4_95508755_C_T_b37	rs12642449	1.5e-10	0.23	Skin - Sun Exposed (Lower leg)
PDLIM5	4	95508755	4:95508755	4_95508755_C_T_b37	rs12642449	5.5e-15	0.33	Cells - Transformed fibroblasts
U3	4	159621185	4:159621185	4_159621185_A_T_b37	rs6856561	8.4e-07	0.62	Brain - Hypothalamus
U3	4	159621185	4:159621185	4_159621185_A_T_b37	rs6856561	7.2e-07	0.62	Brain - Cortex
U3	4	159621185	4:159621185	4_159621185_A_T_b37	rs6856561	6.3e-07	0.62	Small Intestine - Terminal Ileum
U3	4	159621185	4:159621185	4_159621185_A_T_b37	rs6856561	5.7e-07	0.52	Adrenal Gland
U3	4	159621185	4:159621185	4_159621185_A_T_b37	rs6856561	5.7e-07	0.44	Colon - Transverse
U3	4	159621185	4:159621185	4_159621185_A_T_b37	rs6856561	3.7e-07	0.57	Pituitary
U3	4	159621185	4:159621185	4_159621185_A_T_b37	rs6856561	2.7e-07	0.55	Brain - Cerebellum
PPID	4	159621185	4:159621185	4_159621185_A_T_b37	rs6856561	2.1e-07	-0.24	Thyroid
ETFDH	4	159621185	4:159621185	4_159621185_A_T_b37	rs6856561	1.3e-07	0.27	Adrenal Gland	Glutaric acidemia IIC, 231680 (3), Autosomal recessive
PPID	4	159621185	4:159621185	4_159621185_A_T_b37	rs6856561	8.9e-08	-0.22	Adipose - Visceral (Omentum)
PPID	4	159621185	4:159621185	4_159621185_A_T_b37	rs6856561	6.7e-08	-0.2	Heart - Left Ventricle
PPID	4	159621185	4:159621185	4_159621185_A_T_b37	rs6856561	5.9e-08	-0.23	Heart - Atrial Appendage
PPID	4	159621185	4:159621185	4_159621185_A_T_b37	rs6856561	4.8e-08	-0.36	Pancreas
U3	4	159621185	4:159621185	4_159621185_A_T_b37	rs6856561	3.4e-08	0.5	Esophagus - Gastroesophageal Junction
U3	4	159621185	4:159621185	4_159621185_A_T_b37	rs6856561	3.3e-08	0.53	Stomach
U3	4	159621185	4:159621185	4_159621185_A_T_b37	rs6856561	6.1e-09	0.48	Cells - Transformed fibroblasts
U3	4	159621185	4:159621185	4_159621185_A_T_b37	rs6856561	5e-09	0.5	Artery - Aorta
ETFDH	4	159621185	4:159621185	4_159621185_A_T_b37	rs6856561	4.1e-09	0.3	Nerve - Tibial	Glutaric acidemia IIC, 231680 (3), Autosomal recessive
U3	4	159621185	4:159621185	4_159621185_A_T_b37	rs6856561	1.8e-09	0.46	Esophagus - Mucosa
PPID	4	159621185	4:159621185	4_159621185_A_T_b37	rs6856561	7.8e-10	-0.26	Colon - Transverse
U3	4	159621185	4:159621185	4_159621185_A_T_b37	rs6856561	4.7e-10	0.64	Pancreas
U3	4	159621185	4:159621185	4_159621185_A_T_b37	rs6856561	4.5e-10	0.47	Lung
U3	4	159621185	4:159621185	4_159621185_A_T_b37	rs6856561	9.2e-11	0.43	Skin - Not Sun Exposed (Suprapubic)
ETFDH	4	159621185	4:159621185	4_159621185_A_T_b37	rs6856561	5.1e-11	0.3	Esophagus - Muscularis	Glutaric acidemia IIC, 231680 (3), Autosomal recessive
PPID	4	159621185	4:159621185	4_159621185_A_T_b37	rs6856561	4.9e-11	-0.24	Esophagus - Mucosa
U3	4	159621185	4:159621185	4_159621185_A_T_b37	rs6856561	2.8e-11	0.63	Testis
U3	4	159621185	4:159621185	4_159621185_A_T_b37	rs6856561	2.6e-11	0.54	Adipose - Visceral (Omentum)
PPID	4	159621185	4:159621185	4_159621185_A_T_b37	rs6856561	1.9e-11	-0.27	Skin - Sun Exposed (Lower leg)
PPID	4	159621185	4:159621185	4_159621185_A_T_b37	rs6856561	2.8e-12	-0.3	Cells - Transformed fibroblasts
U3	4	159621185	4:159621185	4_159621185_A_T_b37	rs6856561	1.3e-12	0.45	Thyroid
U3	4	159621185	4:159621185	4_159621185_A_T_b37	rs6856561	7.2e-13	0.63	Breast - Mammary Tissue
PPID	4	159621185	4:159621185	4_159621185_A_T_b37	rs6856561	6e-13	-0.28	Adipose - Subcutaneous
ETFDH	4	159621185	4:159621185	4_159621185_A_T_b37	rs6856561	5.5e-13	0.23	Heart - Left Ventricle	Glutaric acidemia IIC, 231680 (3), Autosomal recessive
ETFDH	4	159621185	4:159621185	4_159621185_A_T_b37	rs6856561	9.1e-14	0.27	Heart - Atrial Appendage	Glutaric acidemia IIC, 231680 (3), Autosomal recessive
U3	4	159621185	4:159621185	4_159621185_A_T_b37	rs6856561	1.2e-14	0.52	Esophagus - Muscularis
U3	4	159621185	4:159621185	4_159621185_A_T_b37	rs6856561	3.5e-17	0.53	Artery - Tibial
PPID	4	159621185	4:159621185	4_159621185_A_T_b37	rs6856561	5.1e-18	-0.38	Nerve - Tibial
ETFDH	4	159621185	4:159621185	4_159621185_A_T_b37	rs6856561	5.8e-20	0.44	Artery - Tibial	Glutaric acidemia IIC, 231680 (3), Autosomal recessive
U3	4	159621185	4:159621185	4_159621185_A_T_b37	rs6856561	4.7e-21	0.55	Skin - Sun Exposed (Lower leg)
U3	4	159621185	4:159621185	4_159621185_A_T_b37	rs6856561	2.4e-23	0.66	Adipose - Subcutaneous
U3	4	159621185	4:159621185	4_159621185_A_T_b37	rs6856561	4.5e-24	0.6	Nerve - Tibial
ETFDH	4	159621185	4:159621185	4_159621185_A_T_b37	rs6856561	1.1e-62	0.43	Muscle - Skeletal	Glutaric acidemia IIC, 231680 (3), Autosomal recessive
U3	4	159622910	4:159622910	4_159622910_A_T_b37	rs67481496	8.4e-07	0.62	Brain - Hypothalamus
U3	4	159622910	4:159622910	4_159622910_A_T_b37	rs67481496	6.9e-07	0.62	Small Intestine - Terminal Ileum
U3	4	159622910	4:159622910	4_159622910_A_T_b37	rs67481496	6.4e-07	0.62	Brain - Cortex
U3	4	159622910	4:159622910	4_159622910_A_T_b37	rs67481496	3.3e-07	0.44	Colon - Transverse
U3	4	159622910	4:159622910	4_159622910_A_T_b37	rs67481496	2e-07	0.55	Brain - Cerebellum
U3	4	159622910	4:159622910	4_159622910_A_T_b37	rs67481496	1.8e-07	0.59	Pituitary
PPID	4	159622910	4:159622910	4_159622910_A_T_b37	rs67481496	1.3e-07	-0.24	Thyroid
PPID	4	159622910	4:159622910	4_159622910_A_T_b37	rs67481496	9.7e-08	-0.22	Adipose - Visceral (Omentum)
PPID	4	159622910	4:159622910	4_159622910_A_T_b37	rs67481496	9.2e-08	-0.23	Heart - Atrial Appendage
U3	4	159622910	4:159622910	4_159622910_A_T_b37	rs67481496	8.3e-08	0.51	Stomach
PPID	4	159622910	4:159622910	4_159622910_A_T_b37	rs67481496	8e-08	-0.35	Pancreas
ETFDH	4	159622910	4:159622910	4_159622910_A_T_b37	rs67481496	5.4e-08	0.28	Adrenal Gland	Glutaric acidemia IIC, 231680 (3), Autosomal recessive
U3	4	159622910	4:159622910	4_159622910_A_T_b37	rs67481496	5.4e-08	0.49	Esophagus - Gastroesophageal Junction
U3	4	159622910	4:159622910	4_159622910_A_T_b37	rs67481496	1.6e-08	0.49	Artery - Aorta
PPID	4	159622910	4:159622910	4_159622910_A_T_b37	rs67481496	1.6e-08	-0.21	Heart - Left Ventricle
U3	4	159622910	4:159622910	4_159622910_A_T_b37	rs67481496	8.5e-09	0.44	Esophagus - Mucosa
ETFDH	4	159622910	4:159622910	4_159622910_A_T_b37	rs67481496	7.4e-09	0.29	Nerve - Tibial	Glutaric acidemia IIC, 231680 (3), Autosomal recessive
U3	4	159622910	4:159622910	4_159622910_A_T_b37	rs67481496	4.4e-09	0.48	Cells - Transformed fibroblasts
U3	4	159622910	4:159622910	4_159622910_A_T_b37	rs67481496	2.2e-09	0.62	Pancreas
PPID	4	159622910	4:159622910	4_159622910_A_T_b37	rs67481496	9.1e-10	-0.25	Colon - Transverse
U3	4	159622910	4:159622910	4_159622910_A_T_b37	rs67481496	3.5e-10	0.47	Lung
ETFDH	4	159622910	4:159622910	4_159622910_A_T_b37	rs67481496	3.4e-10	0.29	Esophagus - Muscularis	Glutaric acidemia IIC, 231680 (3), Autosomal recessive
U3	4	159622910	4:159622910	4_159622910_A_T_b37	rs67481496	1.1e-10	0.44	Skin - Not Sun Exposed (Suprapubic)
U3	4	159622910	4:159622910	4_159622910_A_T_b37	rs67481496	5.6e-11	0.54	Adipose - Visceral (Omentum)
PPID	4	159622910	4:159622910	4_159622910_A_T_b37	rs67481496	4.3e-11	-0.24	Esophagus - Mucosa
U3	4	159622910	4:159622910	4_159622910_A_T_b37	rs67481496	2.8e-11	0.63	Testis
PPID	4	159622910	4:159622910	4_159622910_A_T_b37	rs67481496	2e-11	-0.27	Skin - Sun Exposed (Lower leg)
PPID	4	159622910	4:159622910	4_159622910_A_T_b37	rs67481496	6.4e-12	-0.29	Cells - Transformed fibroblasts
U3	4	159622910	4:159622910	4_159622910_A_T_b37	rs67481496	5.1e-12	0.6	Breast - Mammary Tissue
U3	4	159622910	4:159622910	4_159622910_A_T_b37	rs67481496	2e-12	0.44	Thyroid
ETFDH	4	159622910	4:159622910	4_159622910_A_T_b37	rs67481496	7.4e-13	0.22	Heart - Left Ventricle	Glutaric acidemia IIC, 231680 (3), Autosomal recessive
PPID	4	159622910	4:159622910	4_159622910_A_T_b37	rs67481496	5.8e-13	-0.28	Adipose - Subcutaneous
U3	4	159622910	4:159622910	4_159622910_A_T_b37	rs67481496	1.6e-13	0.5	Esophagus - Muscularis
ETFDH	4	159622910	4:159622910	4_159622910_A_T_b37	rs67481496	4.7e-14	0.27	Heart - Atrial Appendage	Glutaric acidemia IIC, 231680 (3), Autosomal recessive
U3	4	159622910	4:159622910	4_159622910_A_T_b37	rs67481496	6.9e-17	0.52	Artery - Tibial
PPID	4	159622910	4:159622910	4_159622910_A_T_b37	rs67481496	1.1e-17	-0.38	Nerve - Tibial
U3	4	159622910	4:159622910	4_159622910_A_T_b37	rs67481496	9.8e-20	0.53	Skin - Sun Exposed (Lower leg)
ETFDH	4	159622910	4:159622910	4_159622910_A_T_b37	rs67481496	1.5e-20	0.44	Artery - Tibial	Glutaric acidemia IIC, 231680 (3), Autosomal recessive
U3	4	159622910	4:159622910	4_159622910_A_T_b37	rs67481496	1.9e-23	0.6	Nerve - Tibial
U3	4	159622910	4:159622910	4_159622910_A_T_b37	rs67481496	5.8e-24	0.67	Adipose - Subcutaneous
ETFDH	4	159622910	4:159622910	4_159622910_A_T_b37	rs67481496	7.7e-64	0.43	Muscle - Skeletal	Glutaric acidemia IIC, 231680 (3), Autosomal recessive
U3	4	159648596	4:159648596	4_159648596_C_T_b37	rs55936281	8.4e-07	0.62	Brain - Hypothalamus
U3	4	159648596	4:159648596	4_159648596_C_T_b37	rs55936281	8.4e-07	0.62	Brain - Hypothalamus
U3	4	159648596	4:159648596	4_159648596_C_T_b37	rs55936281	7.3e-07	0.64	Small Intestine - Terminal Ileum
U3	4	159648596	4:159648596	4_159648596_C_T_b37	rs55936281	7.3e-07	0.64	Small Intestine - Terminal Ileum
PPID	4	159648596	4:159648596	4_159648596_C_T_b37	rs55936281	2.8e-07	-0.23	Thyroid
PPID	4	159648596	4:159648596	4_159648596_C_T_b37	rs55936281	2.8e-07	-0.23	Thyroid
U3	4	159648596	4:159648596	4_159648596_C_T_b37	rs55936281	2.7e-07	0.5	Stomach
U3	4	159648596	4:159648596	4_159648596_C_T_b37	rs55936281	2.7e-07	0.5	Stomach
U3	4	159648596	4:159648596	4_159648596_C_T_b37	rs55936281	1.8e-07	0.59	Pituitary
U3	4	159648596	4:159648596	4_159648596_C_T_b37	rs55936281	1.8e-07	0.59	Pituitary
U3	4	159648596	4:159648596	4_159648596_C_T_b37	rs55936281	1.7e-07	0.56	Brain - Cerebellum
U3	4	159648596	4:159648596	4_159648596_C_T_b37	rs55936281	1.7e-07	0.56	Brain - Cerebellum
PPID	4	159648596	4:159648596	4_159648596_C_T_b37	rs55936281	1.5e-07	-0.35	Pancreas
PPID	4	159648596	4:159648596	4_159648596_C_T_b37	rs55936281	1.5e-07	-0.35	Pancreas
PPID	4	159648596	4:159648596	4_159648596_C_T_b37	rs55936281	1.4e-07	-0.22	Heart - Atrial Appendage
PPID	4	159648596	4:159648596	4_159648596_C_T_b37	rs55936281	1.4e-07	-0.22	Heart - Atrial Appendage
ETFDH	4	159648596	4:159648596	4_159648596_C_T_b37	rs55936281	1.2e-07	0.27	Nerve - Tibial	Glutaric acidemia IIC, 231680 (3), Autosomal recessive
ETFDH	4	159648596	4:159648596	4_159648596_C_T_b37	rs55936281	1.2e-07	0.27	Nerve - Tibial	Glutaric acidemia IIC, 231680 (3), Autosomal recessive
U3	4	159648596	4:159648596	4_159648596_C_T_b37	rs55936281	5.3e-08	0.48	Artery - Aorta
U3	4	159648596	4:159648596	4_159648596_C_T_b37	rs55936281	5.3e-08	0.48	Artery - Aorta
ETFDH	4	159648596	4:159648596	4_159648596_C_T_b37	rs55936281	5.1e-08	0.28	Adrenal Gland	Glutaric acidemia IIC, 231680 (3), Autosomal recessive
ETFDH	4	159648596	4:159648596	4_159648596_C_T_b37	rs55936281	5.1e-08	0.28	Adrenal Gland	Glutaric acidemia IIC, 231680 (3), Autosomal recessive
U3	4	159648596	4:159648596	4_159648596_C_T_b37	rs55936281	4.8e-08	0.49	Esophagus - Gastroesophageal Junction
U3	4	159648596	4:159648596	4_159648596_C_T_b37	rs55936281	4.8e-08	0.49	Esophagus - Gastroesophageal Junction
U3	4	159648596	4:159648596	4_159648596_C_T_b37	rs55936281	4.2e-08	0.57	Pancreas
U3	4	159648596	4:159648596	4_159648596_C_T_b37	rs55936281	4.2e-08	0.57	Pancreas
U3	4	159648596	4:159648596	4_159648596_C_T_b37	rs55936281	8.2e-09	0.47	Cells - Transformed fibroblasts
U3	4	159648596	4:159648596	4_159648596_C_T_b37	rs55936281	8.2e-09	0.47	Cells - Transformed fibroblasts
PPID	4	159648596	4:159648596	4_159648596_C_T_b37	rs55936281	7.8e-09	-0.24	Adipose - Visceral (Omentum)
PPID	4	159648596	4:159648596	4_159648596_C_T_b37	rs55936281	7.8e-09	-0.24	Adipose - Visceral (Omentum)
PPID	4	159648596	4:159648596	4_159648596_C_T_b37	rs55936281	6.6e-09	-0.21	Heart - Left Ventricle
PPID	4	159648596	4:159648596	4_159648596_C_T_b37	rs55936281	6.6e-09	-0.21	Heart - Left Ventricle
ETFDH	4	159648596	4:159648596	4_159648596_C_T_b37	rs55936281	5.5e-09	0.27	Esophagus - Muscularis	Glutaric acidemia IIC, 231680 (3), Autosomal recessive
ETFDH	4	159648596	4:159648596	4_159648596_C_T_b37	rs55936281	5.5e-09	0.27	Esophagus - Muscularis	Glutaric acidemia IIC, 231680 (3), Autosomal recessive
U3	4	159648596	4:159648596	4_159648596_C_T_b37	rs55936281	4.3e-09	0.4	Skin - Not Sun Exposed (Suprapubic)
U3	4	159648596	4:159648596	4_159648596_C_T_b37	rs55936281	4.3e-09	0.4	Skin - Not Sun Exposed (Suprapubic)
U3	4	159648596	4:159648596	4_159648596_C_T_b37	rs55936281	3.6e-09	0.45	Esophagus - Mucosa
U3	4	159648596	4:159648596	4_159648596_C_T_b37	rs55936281	3.6e-09	0.45	Esophagus - Mucosa
PPID	4	159648596	4:159648596	4_159648596_C_T_b37	rs55936281	3.4e-09	-0.25	Colon - Transverse
PPID	4	159648596	4:159648596	4_159648596_C_T_b37	rs55936281	3.4e-09	-0.25	Colon - Transverse
U3	4	159648596	4:159648596	4_159648596_C_T_b37	rs55936281	3.1e-09	0.44	Lung
U3	4	159648596	4:159648596	4_159648596_C_T_b37	rs55936281	3.1e-09	0.44	Lung
U3	4	159648596	4:159648596	4_159648596_C_T_b37	rs55936281	3.7e-10	0.59	Testis
U3	4	159648596	4:159648596	4_159648596_C_T_b37	rs55936281	3.7e-10	0.59	Testis
PPID	4	159648596	4:159648596	4_159648596_C_T_b37	rs55936281	1.7e-10	-0.23	Esophagus - Mucosa
PPID	4	159648596	4:159648596	4_159648596_C_T_b37	rs55936281	1.7e-10	-0.23	Esophagus - Mucosa
U3	4	159648596	4:159648596	4_159648596_C_T_b37	rs55936281	1.3e-10	0.52	Adipose - Visceral (Omentum)
U3	4	159648596	4:159648596	4_159648596_C_T_b37	rs55936281	1.3e-10	0.52	Adipose - Visceral (Omentum)
PPID	4	159648596	4:159648596	4_159648596_C_T_b37	rs55936281	1.1e-10	-0.25	Skin - Sun Exposed (Lower leg)
PPID	4	159648596	4:159648596	4_159648596_C_T_b37	rs55936281	1.1e-10	-0.25	Skin - Sun Exposed (Lower leg)
U3	4	159648596	4:159648596	4_159648596_C_T_b37	rs55936281	8.6e-11	0.41	Thyroid
U3	4	159648596	4:159648596	4_159648596_C_T_b37	rs55936281	8.6e-11	0.41	Thyroid
ETFDH	4	159648596	4:159648596	4_159648596_C_T_b37	rs55936281	1.5e-11	0.21	Heart - Left Ventricle	Glutaric acidemia IIC, 231680 (3), Autosomal recessive
ETFDH	4	159648596	4:159648596	4_159648596_C_T_b37	rs55936281	1.5e-11	0.21	Heart - Left Ventricle	Glutaric acidemia IIC, 231680 (3), Autosomal recessive
PPID	4	159648596	4:159648596	4_159648596_C_T_b37	rs55936281	6.8e-12	-0.29	Cells - Transformed fibroblasts
PPID	4	159648596	4:159648596	4_159648596_C_T_b37	rs55936281	6.8e-12	-0.29	Cells - Transformed fibroblasts
U3	4	159648596	4:159648596	4_159648596_C_T_b37	rs55936281	1.7e-12	0.48	Esophagus - Muscularis
U3	4	159648596	4:159648596	4_159648596_C_T_b37	rs55936281	1.7e-12	0.48	Esophagus - Muscularis
U3	4	159648596	4:159648596	4_159648596_C_T_b37	rs55936281	1.1e-12	0.62	Breast - Mammary Tissue
U3	4	159648596	4:159648596	4_159648596_C_T_b37	rs55936281	1.1e-12	0.62	Breast - Mammary Tissue
PPID	4	159648596	4:159648596	4_159648596_C_T_b37	rs55936281	2.5e-13	-0.28	Adipose - Subcutaneous
PPID	4	159648596	4:159648596	4_159648596_C_T_b37	rs55936281	2.5e-13	-0.28	Adipose - Subcutaneous
ETFDH	4	159648596	4:159648596	4_159648596_C_T_b37	rs55936281	7.5e-14	0.27	Heart - Atrial Appendage	Glutaric acidemia IIC, 231680 (3), Autosomal recessive
ETFDH	4	159648596	4:159648596	4_159648596_C_T_b37	rs55936281	7.5e-14	0.27	Heart - Atrial Appendage	Glutaric acidemia IIC, 231680 (3), Autosomal recessive
U3	4	159648596	4:159648596	4_159648596_C_T_b37	rs55936281	1.6e-17	0.53	Artery - Tibial
U3	4	159648596	4:159648596	4_159648596_C_T_b37	rs55936281	1.6e-17	0.53	Artery - Tibial
U3	4	159648596	4:159648596	4_159648596_C_T_b37	rs55936281	2.2e-18	0.51	Skin - Sun Exposed (Lower leg)
U3	4	159648596	4:159648596	4_159648596_C_T_b37	rs55936281	2.2e-18	0.51	Skin - Sun Exposed (Lower leg)
ETFDH	4	159648596	4:159648596	4_159648596_C_T_b37	rs55936281	1.4e-19	0.43	Artery - Tibial	Glutaric acidemia IIC, 231680 (3), Autosomal recessive
ETFDH	4	159648596	4:159648596	4_159648596_C_T_b37	rs55936281	1.4e-19	0.43	Artery - Tibial	Glutaric acidemia IIC, 231680 (3), Autosomal recessive
PPID	4	159648596	4:159648596	4_159648596_C_T_b37	rs55936281	1e-19	-0.4	Nerve - Tibial
PPID	4	159648596	4:159648596	4_159648596_C_T_b37	rs55936281	1e-19	-0.4	Nerve - Tibial
U3	4	159648596	4:159648596	4_159648596_C_T_b37	rs55936281	2.4e-22	0.59	Nerve - Tibial
U3	4	159648596	4:159648596	4_159648596_C_T_b37	rs55936281	2.4e-22	0.59	Nerve - Tibial
U3	4	159648596	4:159648596	4_159648596_C_T_b37	rs55936281	7.2e-24	0.66	Adipose - Subcutaneous
U3	4	159648596	4:159648596	4_159648596_C_T_b37	rs55936281	7.2e-24	0.66	Adipose - Subcutaneous
ETFDH	4	159648596	4:159648596	4_159648596_C_T_b37	rs55936281	9.1e-61	0.42	Muscle - Skeletal	Glutaric acidemia IIC, 231680 (3), Autosomal recessive
ETFDH	4	159648596	4:159648596	4_159648596_C_T_b37	rs55936281	9.1e-61	0.42	Muscle - Skeletal	Glutaric acidemia IIC, 231680 (3), Autosomal recessive
AGA	4	178361162	4:178361162	4_178361162_T_C_b37	rs4690523	6.2e-07	-0.51	Cells - EBV-transformed lymphocytes	Aspartylglucosaminuria, 208400 (3), Autosomal recessive
AGA	4	178361162	4:178361162	4_178361162_T_C_b37	rs4690523	4e-07	-0.56	Uterus	Aspartylglucosaminuria, 208400 (3), Autosomal recessive
AGA	4	178361162	4:178361162	4_178361162_T_C_b37	rs4690523	9.5e-08	-0.4	Brain - Hypothalamus	Aspartylglucosaminuria, 208400 (3), Autosomal recessive
AGA	4	178361162	4:178361162	4_178361162_T_C_b37	rs4690523	2.5e-08	-0.47	Brain - Anterior cingulate cortex (BA24)	Aspartylglucosaminuria, 208400 (3), Autosomal recessive
AGA	4	178361162	4:178361162	4_178361162_T_C_b37	rs4690523	1.6e-08	-0.44	Brain - Caudate (basal ganglia)	Aspartylglucosaminuria, 208400 (3), Autosomal recessive
AGA	4	178361162	4:178361162	4_178361162_T_C_b37	rs4690523	1.5e-08	-0.36	Adrenal Gland	Aspartylglucosaminuria, 208400 (3), Autosomal recessive
AGA	4	178361162	4:178361162	4_178361162_T_C_b37	rs4690523	1.3e-08	-0.54	Ovary	Aspartylglucosaminuria, 208400 (3), Autosomal recessive
AGA	4	178361162	4:178361162	4_178361162_T_C_b37	rs4690523	2.3e-09	-0.31	Pituitary	Aspartylglucosaminuria, 208400 (3), Autosomal recessive
AGA	4	178361162	4:178361162	4_178361162_T_C_b37	rs4690523	1e-09	-0.5	Brain - Cerebellar Hemisphere	Aspartylglucosaminuria, 208400 (3), Autosomal recessive
AGA	4	178361162	4:178361162	4_178361162_T_C_b37	rs4690523	8e-10	-0.23	Muscle - Skeletal	Aspartylglucosaminuria, 208400 (3), Autosomal recessive
AGA	4	178361162	4:178361162	4_178361162_T_C_b37	rs4690523	1.3e-10	-0.46	Artery - Coronary	Aspartylglucosaminuria, 208400 (3), Autosomal recessive
AGA	4	178361162	4:178361162	4_178361162_T_C_b37	rs4690523	6.1e-11	-0.48	Brain - Cortex	Aspartylglucosaminuria, 208400 (3), Autosomal recessive
AGA	4	178361162	4:178361162	4_178361162_T_C_b37	rs4690523	4.7e-11	-0.51	Brain - Cerebellum	Aspartylglucosaminuria, 208400 (3), Autosomal recessive
AGA	4	178361162	4:178361162	4_178361162_T_C_b37	rs4690523	2.9e-11	-0.55	Minor Salivary Gland	Aspartylglucosaminuria, 208400 (3), Autosomal recessive
AGA	4	178361162	4:178361162	4_178361162_T_C_b37	rs4690523	1.6e-11	-0.58	Spleen	Aspartylglucosaminuria, 208400 (3), Autosomal recessive
AGA	4	178361162	4:178361162	4_178361162_T_C_b37	rs4690523	1.4e-11	-0.39	Breast - Mammary Tissue	Aspartylglucosaminuria, 208400 (3), Autosomal recessive
AGA	4	178361162	4:178361162	4_178361162_T_C_b37	rs4690523	2.7e-12	-0.58	Small Intestine - Terminal Ileum	Aspartylglucosaminuria, 208400 (3), Autosomal recessive
AGA	4	178361162	4:178361162	4_178361162_T_C_b37	rs4690523	2.2e-12	-0.47	Vagina	Aspartylglucosaminuria, 208400 (3), Autosomal recessive
AGA	4	178361162	4:178361162	4_178361162_T_C_b37	rs4690523	1.4e-13	-0.56	Brain - Putamen (basal ganglia)	Aspartylglucosaminuria, 208400 (3), Autosomal recessive
AGA	4	178361162	4:178361162	4_178361162_T_C_b37	rs4690523	7.7e-15	-0.59	Colon - Sigmoid	Aspartylglucosaminuria, 208400 (3), Autosomal recessive
AGA	4	178361162	4:178361162	4_178361162_T_C_b37	rs4690523	4.7e-15	-0.43	Heart - Left Ventricle	Aspartylglucosaminuria, 208400 (3), Autosomal recessive
AGA	4	178361162	4:178361162	4_178361162_T_C_b37	rs4690523	1.1e-16	-0.57	Esophagus - Gastroesophageal Junction	Aspartylglucosaminuria, 208400 (3), Autosomal recessive
AGA	4	178361162	4:178361162	4_178361162_T_C_b37	rs4690523	5.1e-17	-0.44	Cells - Transformed fibroblasts	Aspartylglucosaminuria, 208400 (3), Autosomal recessive
AGA	4	178361162	4:178361162	4_178361162_T_C_b37	rs4690523	3.4e-17	-0.5	Colon - Transverse	Aspartylglucosaminuria, 208400 (3), Autosomal recessive
AGA	4	178361162	4:178361162	4_178361162_T_C_b37	rs4690523	2.6e-18	-0.49	Heart - Atrial Appendage	Aspartylglucosaminuria, 208400 (3), Autosomal recessive
AGA	4	178361162	4:178361162	4_178361162_T_C_b37	rs4690523	5.5e-19	-0.53	Pancreas	Aspartylglucosaminuria, 208400 (3), Autosomal recessive
AGA	4	178361162	4:178361162	4_178361162_T_C_b37	rs4690523	5.2e-20	-0.56	Stomach	Aspartylglucosaminuria, 208400 (3), Autosomal recessive
AGA	4	178361162	4:178361162	4_178361162_T_C_b37	rs4690523	1.3e-20	-0.49	Esophagus - Muscularis	Aspartylglucosaminuria, 208400 (3), Autosomal recessive
AGA	4	178361162	4:178361162	4_178361162_T_C_b37	rs4690523	1.2e-20	-0.49	Adipose - Subcutaneous	Aspartylglucosaminuria, 208400 (3), Autosomal recessive
AGA	4	178361162	4:178361162	4_178361162_T_C_b37	rs4690523	1.5e-22	-0.53	Artery - Aorta	Aspartylglucosaminuria, 208400 (3), Autosomal recessive
AGA	4	178361162	4:178361162	4_178361162_T_C_b37	rs4690523	5.1e-23	-0.41	Nerve - Tibial	Aspartylglucosaminuria, 208400 (3), Autosomal recessive
AGA	4	178361162	4:178361162	4_178361162_T_C_b37	rs4690523	1.9e-24	-0.37	Lung	Aspartylglucosaminuria, 208400 (3), Autosomal recessive
AGA	4	178361162	4:178361162	4_178361162_T_C_b37	rs4690523	6e-25	-0.58	Adipose - Visceral (Omentum)	Aspartylglucosaminuria, 208400 (3), Autosomal recessive
AGA	4	178361162	4:178361162	4_178361162_T_C_b37	rs4690523	6.8e-32	-0.45	Artery - Tibial	Aspartylglucosaminuria, 208400 (3), Autosomal recessive
AGA	4	178361162	4:178361162	4_178361162_T_C_b37	rs4690523	5.7e-32	-0.52	Skin - Not Sun Exposed (Suprapubic)	Aspartylglucosaminuria, 208400 (3), Autosomal recessive
AGA	4	178361162	4:178361162	4_178361162_T_C_b37	rs4690523	1.6e-32	-0.54	Esophagus - Mucosa	Aspartylglucosaminuria, 208400 (3), Autosomal recessive
AGA	4	178361162	4:178361162	4_178361162_T_C_b37	rs4690523	5e-35	-0.44	Thyroid	Aspartylglucosaminuria, 208400 (3), Autosomal recessive
AGA	4	178361162	4:178361162	4_178361162_T_C_b37	rs4690523	2.4e-36	-0.43	Skin - Sun Exposed (Lower leg)	Aspartylglucosaminuria, 208400 (3), Autosomal recessive
AGA	4	178361162	4:178361162	4_178361162_T_C_b37	rs4690523	5.7e-42	-0.66	Whole Blood	Aspartylglucosaminuria, 208400 (3), Autosomal recessive
CTD-3080P12.3	5	1183560	5:1183560	5_1183560_C_T_b37	rs11750211	7.7e-07	0.66	Uterus
CTD-3080P12.3	5	1183560	5:1183560	5_1183560_C_T_b37	rs11750211	3.3e-07	0.53	Pituitary
CTD-3080P12.3	5	1183560	5:1183560	5_1183560_C_T_b37	rs11750211	2.2e-07	0.43	Adipose - Visceral (Omentum)
CTD-3080P12.3	5	1183560	5:1183560	5_1183560_C_T_b37	rs11750211	1.1e-07	0.32	Artery - Tibial
CTD-3080P12.3	5	1183560	5:1183560	5_1183560_C_T_b37	rs11750211	4.2e-08	-0.49	Testis
CTD-3080P12.3	5	1183560	5:1183560	5_1183560_C_T_b37	rs11750211	5.2e-09	0.46	Esophagus - Muscularis
CTD-3080P12.3	5	1183560	5:1183560	5_1183560_C_T_b37	rs11750211	4.1e-09	0.5	Heart - Atrial Appendage
CTD-3080P12.3	5	1183560	5:1183560	5_1183560_C_T_b37	rs11750211	9.3e-10	0.61	Esophagus - Gastroesophageal Junction
CTD-3080P12.3	5	1183560	5:1183560	5_1183560_C_T_b37	rs11750211	4.2e-10	0.45	Nerve - Tibial
CTD-3080P12.3	5	1183560	5:1183560	5_1183560_C_T_b37	rs11750211	2.8e-10	0.46	Adipose - Subcutaneous
CTD-3080P12.3	5	1183560	5:1183560	5_1183560_C_T_b37	rs11750211	2.5e-10	0.45	Skin - Not Sun Exposed (Suprapubic)
CTD-3080P12.3	5	1183560	5:1183560	5_1183560_C_T_b37	rs11750211	3.5e-11	0.49	Esophagus - Mucosa
CTD-3080P12.3	5	1183560	5:1183560	5_1183560_C_T_b37	rs11750211	2.9e-12	0.48	Thyroid
CTD-3080P12.3	5	1183560	5:1183560	5_1183560_C_T_b37	rs11750211	7.2e-27	0.79	Lung
BHMT2	5	78319710	5:78319710	5_78319710_C_G_b37	rs6877698	3.7e-07	0.24	Nerve - Tibial
BHMT	5	78319710	5:78319710	5_78319710_C_G_b37	rs6877698	3.1e-07	-0.27	Adipose - Subcutaneous
BHMT2	5	78319710	5:78319710	5_78319710_C_G_b37	rs6877698	2.5e-08	0.17	Adipose - Subcutaneous
BHMT2	5	78319710	5:78319710	5_78319710_C_G_b37	rs6877698	1.4e-10	0.35	Artery - Tibial
BHMT	5	78372514	5:78372514	5_78372514_G_GTC_b37	rs10679800	4.2e-07	0.65	Pituitary
DMGDH	5	78372514	5:78372514	5_78372514_G_GTC_b37	rs10679800	2.5e-07	0.26	Artery - Tibial	Dimethylglycine dehydrogenase deficiency, 605850 (3), Autosomal recessive
DMGDH	5	78372514	5:78372514	5_78372514_G_GTC_b37	rs10679800	2.2e-07	0.32	Thyroid	Dimethylglycine dehydrogenase deficiency, 605850 (3), Autosomal recessive
BHMT2	5	78372514	5:78372514	5_78372514_G_GTC_b37	rs10679800	1.3e-07	0.31	Nerve - Tibial
DMGDH	5	78372514	5:78372514	5_78372514_G_GTC_b37	rs10679800	1.1e-07	0.42	Colon - Sigmoid	Dimethylglycine dehydrogenase deficiency, 605850 (3), Autosomal recessive
BHMT	5	78372514	5:78372514	5_78372514_G_GTC_b37	rs10679800	8.8e-08	0.41	Muscle - Skeletal
BHMT2	5	78372514	5:78372514	5_78372514_G_GTC_b37	rs10679800	5.1e-08	0.25	Skin - Sun Exposed (Lower leg)
BHMT	5	78372514	5:78372514	5_78372514_G_GTC_b37	rs10679800	1.7e-08	0.4	Thyroid
BHMT	5	78372514	5:78372514	5_78372514_G_GTC_b37	rs10679800	7e-09	0.68	Heart - Atrial Appendage
BHMT2	5	78372514	5:78372514	5_78372514_G_GTC_b37	rs10679800	6.5e-09	0.56	Heart - Left Ventricle
BHMT2	5	78372514	5:78372514	5_78372514_G_GTC_b37	rs10679800	1.6e-09	0.34	Stomach
BHMT	5	78372514	5:78372514	5_78372514_G_GTC_b37	rs10679800	1.5e-09	0.73	Adrenal Gland
BHMT2	5	78372514	5:78372514	5_78372514_G_GTC_b37	rs10679800	9.6e-10	0.57	Adrenal Gland
DMGDH	5	78372514	5:78372514	5_78372514_G_GTC_b37	rs10679800	7.5e-10	0.36	Muscle - Skeletal	Dimethylglycine dehydrogenase deficiency, 605850 (3), Autosomal recessive
BHMT2	5	78372514	5:78372514	5_78372514_G_GTC_b37	rs10679800	5.7e-10	0.46	Artery - Aorta
BHMT2	5	78372514	5:78372514	5_78372514_G_GTC_b37	rs10679800	2.7e-10	0.34	Adipose - Visceral (Omentum)
BHMT	5	78372514	5:78372514	5_78372514_G_GTC_b37	rs10679800	1.4e-10	0.77	Colon - Sigmoid
BHMT2	5	78372514	5:78372514	5_78372514_G_GTC_b37	rs10679800	2.5e-11	0.62	Cells - Transformed fibroblasts
BHMT	5	78372514	5:78372514	5_78372514_G_GTC_b37	rs10679800	1e-11	0.48	Nerve - Tibial
BHMT2	5	78372514	5:78372514	5_78372514_G_GTC_b37	rs10679800	7.1e-12	0.71	Colon - Sigmoid
DMGDH	5	78372514	5:78372514	5_78372514_G_GTC_b37	rs10679800	9.5e-13	0.5	Heart - Atrial Appendage	Dimethylglycine dehydrogenase deficiency, 605850 (3), Autosomal recessive
BHMT	5	78372514	5:78372514	5_78372514_G_GTC_b37	rs10679800	3.8e-13	0.6	Esophagus - Muscularis
BHMT2	5	78372514	5:78372514	5_78372514_G_GTC_b37	rs10679800	1.4e-13	0.45	Thyroid
BHMT2	5	78372514	5:78372514	5_78372514_G_GTC_b37	rs10679800	1.7e-14	0.53	Artery - Tibial
BHMT2	5	78372514	5:78372514	5_78372514_G_GTC_b37	rs10679800	1.2e-14	0.58	Lung
BHMT2	5	78372514	5:78372514	5_78372514_G_GTC_b37	rs10679800	2e-15	0.31	Adipose - Subcutaneous
BHMT2	5	78372514	5:78372514	5_78372514_G_GTC_b37	rs10679800	3.5e-19	0.76	Heart - Atrial Appendage
BHMT2	5	78372514	5:78372514	5_78372514_G_GTC_b37	rs10679800	3.4e-23	0.6	Muscle - Skeletal
RAPGEF6	5	131623358	5:131623358	5_131623358_A_G_b37	rs7705189	0.00018	-0.12	Artery - Tibial_x001A_
ACSL6	5	131623358	5:131623358	5_131623358_A_G_b37	rs7705189	8.7e-05	-0.19	Esophagus - Muscularis	Myelodysplastic syndrome (3); Myelogenous leukemia, acute (3)
P4HA2	5	131623358	5:131623358	5_131623358_A_G_b37	rs7705189	9e-07	0.19	Esophagus - Muscularis	Myopia 25, autosomal dominant, 617238 (3), Autosomal dominant
SLC22A5	5	131623358	5:131623358	5_131623358_A_G_b37	rs7705189	5.1e-07	-0.6	Spleen	Carnitine deficiency, systemic primary, 212140 (3), Autosomal recessive
SLC22A5	5	131623358	5:131623358	5_131623358_A_G_b37	rs7705189	2.9e-07	-0.29	Pancreas	Carnitine deficiency, systemic primary, 212140 (3), Autosomal recessive
AC034220.3	5	131623358	5:131623358	5_131623358_A_G_b37	rs7705189	2.6e-07	0.21	Adipose - Visceral (Omentum)
AC034220.3	5	131623358	5:131623358	5_131623358_A_G_b37	rs7705189	1.5e-07	0.27	Esophagus - Muscularis
AC034220.3	5	131623358	5:131623358	5_131623358_A_G_b37	rs7705189	1.2e-07	0.55	Brain - Nucleus accumbens (basal ganglia)
PDLIM4	5	131623358	5:131623358	5_131623358_A_G_b37	rs7705189	6.4e-08	-0.14	Adipose - Subcutaneous	Osteoporosis, susceptibility to, 166710 (3), Autosomal dominant
AC034220.3	5	131623358	5:131623358	5_131623358_A_G_b37	rs7705189	3e-08	0.67	Brain - Hypothalamus
AC034220.3	5	131623358	5:131623358	5_131623358_A_G_b37	rs7705189	1.1e-08	0.63	Brain - Caudate (basal ganglia)
AC034220.3	5	131623358	5:131623358	5_131623358_A_G_b37	rs7705189	8.6e-09	0.44	Testis
SLC22A5	5	131623358	5:131623358	5_131623358_A_G_b37	rs7705189	6.4e-09	-0.31	Adipose - Subcutaneous	Carnitine deficiency, systemic primary, 212140 (3), Autosomal recessive
AC063976.7	5	131623358	5:131623358	5_131623358_A_G_b37	rs7705189	5.3e-09	0.25	Thyroid
P4HA2	5	131623358	5:131623358	5_131623358_A_G_b37	rs7705189	1.9e-09	0.37	Pancreas	Myopia 25, autosomal dominant, 617238 (3), Autosomal dominant
PDLIM4	5	131623358	5:131623358	5_131623358_A_G_b37	rs7705189	1e-09	-0.18	Thyroid	Osteoporosis, susceptibility to, 166710 (3), Autosomal dominant
AC034220.3	5	131623358	5:131623358	5_131623358_A_G_b37	rs7705189	7e-10	0.28	Thyroid
AC116366.6	5	131623358	5:131623358	5_131623358_A_G_b37	rs7705189	1.9e-10	0.22	Whole Blood
SLC22A5	5	131623358	5:131623358	5_131623358_A_G_b37	rs7705189	5.8e-11	-0.21	Thyroid	Carnitine deficiency, systemic primary, 212140 (3), Autosomal recessive
PDLIM4	5	131623358	5:131623358	5_131623358_A_G_b37	rs7705189	4.2e-11	-0.31	Heart - Left Ventricle	Osteoporosis, susceptibility to, 166710 (3), Autosomal dominant
SLC22A5	5	131623358	5:131623358	5_131623358_A_G_b37	rs7705189	8.2e-12	-0.35	Lung	Carnitine deficiency, systemic primary, 212140 (3), Autosomal recessive
SLC22A5	5	131623358	5:131623358	5_131623358_A_G_b37	rs7705189	6.4e-14	-0.37	Artery - Tibial	Carnitine deficiency, systemic primary, 212140 (3), Autosomal recessive
P4HA2	5	131623358	5:131623358	5_131623358_A_G_b37	rs7705189	3.2e-14	0.35	Artery - Aorta	Myopia 25, autosomal dominant, 617238 (3), Autosomal dominant
AC034220.3	5	131623358	5:131623358	5_131623358_A_G_b37	rs7705189	1.4e-14	0.44	Heart - Left Ventricle
P4HA2	5	131623358	5:131623358	5_131623358_A_G_b37	rs7705189	3.3e-17	0.29	Nerve - Tibial	Myopia 25, autosomal dominant, 617238 (3), Autosomal dominant
SLC22A5	5	131623358	5:131623358	5_131623358_A_G_b37	rs7705189	1e-17	-0.46	Whole Blood	Carnitine deficiency, systemic primary, 212140 (3), Autosomal recessive
AC034220.3	5	131623358	5:131623358	5_131623358_A_G_b37	rs7705189	5.6e-18	0.47	Heart - Atrial Appendage
P4HA2	5	131623358	5:131623358	5_131623358_A_G_b37	rs7705189	3.6e-18	0.39	Testis	Myopia 25, autosomal dominant, 617238 (3), Autosomal dominant
AC034220.3	5	131623358	5:131623358	5_131623358_A_G_b37	rs7705189	2.9e-18	0.32	Muscle - Skeletal
PDLIM4	5	131623358	5:131623358	5_131623358_A_G_b37	rs7705189	1.3e-18	-0.27	Skin - Sun Exposed (Lower leg)	Osteoporosis, susceptibility to, 166710 (3), Autosomal dominant
SLC22A5	5	131623358	5:131623358	5_131623358_A_G_b37	rs7705189	1.5e-19	-0.38	Skin - Not Sun Exposed (Suprapubic)	Carnitine deficiency, systemic primary, 212140 (3), Autosomal recessive
P4HA2	5	131623358	5:131623358	5_131623358_A_G_b37	rs7705189	1.3e-20	0.24	Artery - Tibial	Myopia 25, autosomal dominant, 617238 (3), Autosomal dominant
P4HA2	5	131623358	5:131623358	5_131623358_A_G_b37	rs7705189	3.8e-25	0.45	Esophagus - Mucosa	Myopia 25, autosomal dominant, 617238 (3), Autosomal dominant
SLC22A5	5	131623358	5:131623358	5_131623358_A_G_b37	rs7705189	3.4e-26	-0.38	Esophagus - Mucosa	Carnitine deficiency, systemic primary, 212140 (3), Autosomal recessive
SLC22A5	5	131623358	5:131623358	5_131623358_A_G_b37	rs7705189	2.9e-28	-0.53	Cells - Transformed fibroblasts	Carnitine deficiency, systemic primary, 212140 (3), Autosomal recessive
SLC22A5	5	131623358	5:131623358	5_131623358_A_G_b37	rs7705189	4.8e-31	-0.42	Skin - Sun Exposed (Lower leg)	Carnitine deficiency, systemic primary, 212140 (3), Autosomal recessive
P4HA2	5	131623358	5:131623358	5_131623358_A_G_b37	rs7705189	2.2e-34	0.42	Thyroid	Myopia 25, autosomal dominant, 617238 (3), Autosomal dominant
AC034220.3	5	131629165	5:131629165	5_131629165_A_G_b37	rs162887	8.8e-07	0.34	Pancreas
AC034220.3	5	131629165	5:131629165	5_131629165_A_G_b37	rs162887	6.6e-07	0.28	Prostate
AC034220.3	5	131629165	5:131629165	5_131629165_A_G_b37	rs162887	5.9e-07	0.62	Brain - Frontal Cortex (BA9)
AC034220.3	5	131629165	5:131629165	5_131629165_A_G_b37	rs162887	4.8e-07	0.32	Liver
AC034220.3	5	131629165	5:131629165	5_131629165_A_G_b37	rs162887	2.8e-07	0.23	Artery - Tibial
P4HA2	5	131629165	5:131629165	5_131629165_A_G_b37	rs162887	2.3e-07	0.15	Artery - Tibial	Myopia 25, autosomal dominant, 617238 (3), Autosomal dominant
AC034220.3	5	131629165	5:131629165	5_131629165_A_G_b37	rs162887	2e-07	0.48	Brain - Cerebellar Hemisphere
PDLIM4	5	131629165	5:131629165	5_131629165_A_G_b37	rs162887	1.6e-07	-0.22	Skin - Not Sun Exposed (Suprapubic)	Osteoporosis, susceptibility to, 166710 (3), Autosomal dominant
AC034220.3	5	131629165	5:131629165	5_131629165_A_G_b37	rs162887	1e-07	0.38	Small Intestine - Terminal Ileum
AC034220.3	5	131629165	5:131629165	5_131629165_A_G_b37	rs162887	8.2e-08	0.71	Brain - Putamen (basal ganglia)
AC034220.3	5	131629165	5:131629165	5_131629165_A_G_b37	rs162887	6.2e-08	0.27	Skin - Not Sun Exposed (Suprapubic)
PDLIM4	5	131629165	5:131629165	5_131629165_A_G_b37	rs162887	7.5e-09	-0.14	Cells - Transformed fibroblasts	Osteoporosis, susceptibility to, 166710 (3), Autosomal dominant
P4HA2	5	131629165	5:131629165	5_131629165_A_G_b37	rs162887	7.2e-09	0.29	Artery - Aorta	Myopia 25, autosomal dominant, 617238 (3), Autosomal dominant
SLC22A5	5	131629165	5:131629165	5_131629165_A_G_b37	rs162887	7.1e-09	0.32	Brain - Cerebellum	Carnitine deficiency, systemic primary, 212140 (3), Autosomal recessive
AC034220.3	5	131629165	5:131629165	5_131629165_A_G_b37	rs162887	5.8e-09	0.75	Brain - Cortex
SLC22A5	5	131629165	5:131629165	5_131629165_A_G_b37	rs162887	5.7e-09	-0.33	Lung	Carnitine deficiency, systemic primary, 212140 (3), Autosomal recessive
AC034220.3	5	131629165	5:131629165	5_131629165_A_G_b37	rs162887	2.2e-09	0.29	Nerve - Tibial
AC034220.3	5	131629165	5:131629165	5_131629165_A_G_b37	rs162887	1.1e-09	0.33	Esophagus - Muscularis
AC034220.3	5	131629165	5:131629165	5_131629165_A_G_b37	rs162887	4.7e-10	0.33	Adipose - Subcutaneous
AC034220.3	5	131629165	5:131629165	5_131629165_A_G_b37	rs162887	3.6e-10	0.23	Colon - Transverse
AC034220.3	5	131629165	5:131629165	5_131629165_A_G_b37	rs162887	3.4e-10	0.7	Brain - Nucleus accumbens (basal ganglia)
AC034220.3	5	131629165	5:131629165	5_131629165_A_G_b37	rs162887	4.7e-11	0.53	Testis
AC034220.3	5	131629165	5:131629165	5_131629165_A_G_b37	rs162887	4.3e-11	0.28	Adipose - Visceral (Omentum)
P4HA2	5	131629165	5:131629165	5_131629165_A_G_b37	rs162887	2.3e-11	0.24	Nerve - Tibial	Myopia 25, autosomal dominant, 617238 (3), Autosomal dominant
AC034220.3	5	131629165	5:131629165	5_131629165_A_G_b37	rs162887	1e-11	0.58	Adrenal Gland
AC034220.3	5	131629165	5:131629165	5_131629165_A_G_b37	rs162887	7.6e-12	0.4	Lung
AC034220.3	5	131629165	5:131629165	5_131629165_A_G_b37	rs162887	6.4e-12	0.32	Skin - Sun Exposed (Lower leg)
PDLIM4	5	131629165	5:131629165	5_131629165_A_G_b37	rs162887	2.7e-12	-0.23	Skin - Sun Exposed (Lower leg)	Osteoporosis, susceptibility to, 166710 (3), Autosomal dominant
SLC22A4	5	131629165	5:131629165	5_131629165_A_G_b37	rs162887	2.6e-12	-0.24	Muscle - Skeletal	Rheumatoid arthritis, susceptibility to, 180300 (3)
P4HA2	5	131629165	5:131629165	5_131629165_A_G_b37	rs162887	2.1e-12	0.35	Esophagus - Mucosa	Myopia 25, autosomal dominant, 617238 (3), Autosomal dominant
AC034220.3	5	131629165	5:131629165	5_131629165_A_G_b37	rs162887	1.6e-12	0.31	Artery - Aorta
AC034220.3	5	131629165	5:131629165	5_131629165_A_G_b37	rs162887	1.2e-12	0.54	Pituitary
AC034220.3	5	131629165	5:131629165	5_131629165_A_G_b37	rs162887	8.7e-13	0.8	Brain - Caudate (basal ganglia)
AC034220.3	5	131629165	5:131629165	5_131629165_A_G_b37	rs162887	5.1e-13	0.33	Esophagus - Mucosa
SLC22A5	5	131629165	5:131629165	5_131629165_A_G_b37	rs162887	4.6e-13	-0.3	Esophagus - Mucosa	Carnitine deficiency, systemic primary, 212140 (3), Autosomal recessive
SLC22A5	5	131629165	5:131629165	5_131629165_A_G_b37	rs162887	3e-13	-0.33	Skin - Not Sun Exposed (Suprapubic)	Carnitine deficiency, systemic primary, 212140 (3), Autosomal recessive
AC034220.3	5	131629165	5:131629165	5_131629165_A_G_b37	rs162887	1.5e-13	0.77	Spleen
P4HA2	5	131629165	5:131629165	5_131629165_A_G_b37	rs162887	8.4e-17	0.34	Thyroid	Myopia 25, autosomal dominant, 617238 (3), Autosomal dominant
AC034220.3	5	131629165	5:131629165	5_131629165_A_G_b37	rs162887	7.1e-17	0.5	Heart - Atrial Appendage
[truncated: 3,960 more rows]

## Sheet: Table S6
1	METABOLITE NAME	PHENOTYPE	rg	se	z	p
[truncated: 348 more rows]

## Sheet: Table S7
Chr	Pos	SNP	Ref. Allele	Beta.Br	SE.Br	Pval.Br	Beta.Kora	SE.Kora	Pval.Kora	Region	Metabolite	hmmm	hmmm2
[truncated: 15,708 more rows]

[truncated: 2 more sheets: Table S8, Table S9]
